# Supplementary material for: Chlamydia interfere with an interaction between the mannose-6-phosphate receptor and sorting nexins to counteract host restriction
Source: eLife journal article supplement (doi:10.7554/elife.22709), 2017-03-02
Supplement: supp [file elife_poa_e22709_Supplementary_File_3.doc]

**Supplementary File 3.** Data collection and refinement statistics

|  | SNX5-PX:IncE |
| --- | --- |
| **Data collection** |  |
| X-ray source | ALS 8.3.1 |
| X-ray wavelength (Å) | 1.11587 |
| Space group | P 21 |
| Cell dimensions |  |
| *a, b, c* (Å) | 36.73, 110.10, 86.13 |
| β (°) | 90.34 |
| Resolution (Å) a | 67.84-2.31 (2.43-2.31) |
| No. of unique reflections | 29,845 (4,320) |
| Rmeas (%) | 19.9 (149.8) |
| Mean ((I)/sd(I)) | 6.5 (1.3) |
| CC1/2 | 0.987 (0.332) |
| Completeness (%) | 99.4 (98.7) |
| Redundancy | 3.6 (3.6) |
| **Refinement** |  |
| Resolution (Å) | 67.84-2.31 |
| No. of reflections | 29,799 |
| Rwork/Rfree (%) | 20.32/26.00 |
| No. of atoms |  |
| Protein | 5,549 |
| Water | 252 |
| Average B-factors (Å2) |  |
| SNX5-PX, chain A | 43.15 |
| IncE, chain P | 53.89 |
| Water | 39.65 |
| R.m.s. deviations |  |
| Bond lengths (Å) | 0.004 |
| Bond angles (°) | 0.640 |
| Ramachandran plot (%) b |  |
| Favored regions | 97.19 |
| Allowed regions | 2.81 |
| PDB ID | 5TP1 |

a Values in parentheses refer to the highest resolution shell.

b As given by MolProbity (Chen et al., 2010).
