# Supplementary material for: Chlamydia interfere with an interaction between the mannose-6-phosphate receptor and sorting nexins to counteract host restriction
Source: eLife. 2017 Mar 2;6:e22709. doi: 10.7554/eLife.22709 (PMC5364026; doi:10.7554/eLife.22709)
Supplement: Supplementary file 2. — Columns C-N show the number of peptide-charge state pairs (Num Pep/Charge) and columns O-Z show the sum of all peptide intensities (Intensity) for each protein detected in each biological replicate as indicated. Proteins are identified by UniProt accession numbers; entries with multiple UniProt accession numbers represent those identified by peptide sequences shared by multiple protein sequences. DOI: http://dx.doi.org/10.7554/eLife.22709.015 [file elife-22709-supp2.xls]

## Sheet: Data
Accession	Description	Mock	Mock	Mock	SNX5 WT_Mouse	SNX5 WT_Mouse	SNX5 WT_Mouse	SNX5 Y132D_Mouse	SNX5 Y132D_Mouse	SNX5 Y132D_Mouse	SNX5 F136D_Mouse	SNX5 F136D_Mouse	SNX5 F136D_Mouse	Mock;	Mock	Mock	SNX5 WT_Mouse	SNX5 WT_Mouse	SNX5 WT_Mouse;	SNX5 F136D_Mouse	SNX5 F136D_Mouse	SNX5 F136D_Mouse;	SNX5 Y132D_Mouse;	SNX5 Y132D_Mouse	SNX5 Y132D_Mouse
Q9HCC0	Methylcrotonoyl-CoA carboxylase beta chain, mitochondrial	2	2	0	1	2	1	0	1	0	1	1	1	2277600	1022100	0	802230	3125200	733540	12345000	6461400	14302000	0	0	583780
O75935	Dynactin subunit 3	2	3	1	1	2	1	0	1	0	2	2	1	5120500	2554750	1547500	1183000	4046100	947710	6367100	580450	4848200	0	0	684440
P19474	E3 ubiquitin-protein ligase TRIM21	5	4	3	4	5	5	3	4	4	5	5	3	19939900	5217360	4342720	12505700	26455900	5580740	23913100	3050800	20307800	11986000	8712160	12001300
P08069	Insulin-like growth factor 1 receptor;Insulin-like growth factor 1 receptor alpha chain;Insulin-like growth factor 1 receptor beta chain	0	0	0	12	9	12	0	0	0	0	0	0	0	0	0	36783110	38401600	28939180	0	0	0	0	0	0
Q14683	Structural maintenance of chromosomes protein 1A	22	19	10	20	22	17	17	18	13	18	15	13	77566400	29944110	19146230	37210910	98108720	28296060	35636820	11537380	40333020	39920010	20431650	51028900
Q13347	Eukaryotic translation initiation factor 3 subunit I	22	22	22	23	25	22	26	29	25	29	28	21	224884580	89285490	125506310	186439140	284058220	110777480	194978860	76947870	204918240	193988210	142571990	252898440
P17812	CTP synthase 1	3	1	0	4	4	3	2	1	0	2	3	1	4327300	778190	0	4005300	11470000	5407830	5737100	314840	4568000	3651800	0	1371100
P62316	Small nuclear ribonucleoprotein Sm D2	23	19	14	21	24	15	18	21	13	21	19	14	414076900	82378400	94662630	159231640	403701400	148239470	186418600	33702010	322639000	317591500	99149180	225036100
P62829	60S ribosomal protein L23	4	3	0	6	5	2	3	3	0	2	4	0	18061100	2494920	0	5031100	21485900	10593110	10456130	0	7174100	9620500	0	11986500
Q9Y3F4	Serine-threonine kinase receptor-associated protein	4	2	1	6	5	5	4	3	2	4	6	0	7408900	2817100	1331100	8526340	16582400	5234440	9166700	0	6327200	11273800	2341070	4298000
Q07866	Kinesin light chain 1	6	2	3	6	4	6	4	2	3	3	4	2	14715000	1585180	3771400	9789820	10810800	8672940	5400700	1260620	5778420	7097840	4274850	3790070
P24534	Elongation factor 1-beta	14	12	12	14	15	12	11	13	10	13	11	10	788544200	186928020	128957350	223290000	787589250	234448700	459150000	76986880	504231200	471162600	177100150	552229200
O43175	D-3-phosphoglycerate dehydrogenase	24	17	15	20	20	20	17	16	15	20	21	18	118883600	34398530	39422930	83866490	98026000	42829850	63870920	30997830	76615870	65647700	38005840	53587000
P11717	Cation-independent mannose-6-phosphate receptor	8	3	2	24	25	31	4	6	1	7	1	0	10966530	1784310	965640	80460300	83764200	33300440	914190	0	7083720	2961050	553710	5920430
P50990	T-complex protein 1 subunit theta	46	50	54	48	56	65	41	49	54	56	46	48	424616800	188567470	352146630	968191170	702080810	209550240	315212080	208996900	404198800	326909400	392051150	349554900
Q8IX12	Cell division cycle and apoptosis regulator protein 1	22	12	5	13	13	15	10	10	10	10	11	7	74407580	14698750	7067840	36384780	33602930	13965100	18146330	6128900	21032830	25363460	12127900	20632510
Q01804	OTU domain-containing protein 4	38	34	30	34	41	31	31	38	26	36	33	20	301122600	112774270	79993740	107627610	237247930	92610980	119559060	38177110	148287060	137723000	72771550	139908550
Q5T8P6	RNA-binding protein 26	5	3	1	4	4	4	1	2	0	3	3	2	15011500	2093900	1075900	6293400	7310500	3258690	4031620	1253790	4815100	1467100	0	1608820
P15586	N-acetylglucosamine-6-sulfatase	1	0	0	1	2	2	0	0	0	0	1	0	722380	0	0	1935490	2841560	565950	405320	0	0	0	0	0
Q14157	Ubiquitin-associated protein 2-like	7	3	2	5	4	5	3	3	3	3	4	3	23069100	2671600	3154000	12251000	11908640	6918830	8535450	2735660	10267700	11032800	5021930	6433930
Q07955	Serine/arginine-rich splicing factor 1	2	2	1	2	2	2	0	1	0	2	2	0	2934800	1337700	642200	2508840	2355580	892400	3261920	0	1464050	0	0	609050
Q4VCS5	Angiomotin	29	23	20	27	32	27	23	28	25	29	27	22	120280100	37763640	41975330	99031370	175512520	63316870	75344240	34731370	98052830	93793640	62840880	92714430
P61981	14-3-3 protein gamma;14-3-3 protein gamma, N-terminally processed	3	2	2	4	3	4	2	2	2	3	2	2	7660700	2342370	2382500	10640380	8552800	3141870	7378100	1701620	3333910	4126400	2029560	4171100
P62081	40S ribosomal protein S7	3	3	3	4	4	3	2	3	1	3	3	1	16930400	7086530	4499200	5701170	19179400	7386650	13089300	464540	5049780	10647500	2001500	9070800
Q14839;Q8TDI0	Chromodomain-helicase-DNA-binding protein 4;Chromodomain-helicase-DNA-binding protein 5	5	4	1	3	4	4	2	2	2	4	3	1	11578800	4348830	1681200	5400940	10627200	4360510	4409620	693490	7295960	5485900	3115700	4672500
O00231	26S proteasome non-ATPase regulatory subunit 11	12	10	8	13	16	14	12	15	12	13	14	6	74819800	23396110	17794290	59308420	102160400	29294700	45897100	8059190	50999870	51864500	27668620	54664900
P11142	Heat shock cognate 71 kDa protein	50	38	47	50	46	53	48	44	49	52	47	44	703086650	175565280	266701840	680242290	688053550	321605810	456352250	197552550	714938360	510337540	440773430	426983800
Q9NWU2	Glucose-induced degradation protein 8 homolog	0	1	0	1	0	0	2	2	1	1	0	0	0	558870	0	0	0	792200	0	0	800090	2535500	786930	2464100
P62266	40S ribosomal protein S23	2	3	1	1	2	1	2	3	3	3	3	1	4606600	3117890	784020	1651400	5138600	629370	3714830	223600	4640780	3191270	1990150	5493850
Q07065	Cytoskeleton-associated protein 4	2	5	1	1	3	1	3	4	2	2	1	0	2263180	3996220	791850	966270	8463500	1507800	1340000	0	3666200	6431100	1267170	8151500
P23526	Adenosylhomocysteinase	3	3	1	3	4	5	2	2	4	4	4	2	4106900	1828010	1907100	7641910	12336200	2316250	6935100	1448640	4863640	2069300	5167540	2968600
O95218	Zinc finger Ran-binding domain-containing protein 2	9	6	8	10	8	9	8	7	8	10	7	7	71181300	14340030	43640800	72827200	49532700	38894640	32037820	21115690	67930600	57205900	41181930	28446880
P07919	Cytochrome b-c1 complex subunit 6, mitochondrial	0	2	0	1	3	2	0	2	0	3	1	2	0	2890900	0	4282800	10318500	2257400	1912400	1600520	6360400	0	0	6841000
P62750	60S ribosomal protein L23a	6	6	3	7	7	5	5	6	4	4	5	3	23757000	10714230	4313580	8656480	24610830	8460270	12901480	2267880	13830920	13177510	6750540	17074990
Q86X55	Histone-arginine methyltransferase CARM1	1	0	1	2	2	2	1	1	0	2	3	0	1387700	0	1075500	2127270	2851060	1683710	5594700	0	2500300	817200	0	1664000
Q9Y5K5	Ubiquitin carboxyl-terminal hydrolase isozyme L5	2	1	1	2	3	2	1	1	1	3	2	1	4852700	905580	947760	4231500	6510200	1865170	2722360	514830	4041510	1737300	1020300	1644600
O43809	Cleavage and polyadenylation specificity factor subunit 5	3	2	2	3	3	3	1	2	2	3	2	3	16990200	3895000	6868800	11625300	10235300	4908400	7279400	4199000	8630900	4385200	4510200	7876000
O95400	CD2 antigen cytoplasmic tail-binding protein 2	4	4	5	4	5	5	2	4	4	3	5	6	10637500	4923250	9614600	12244250	15366800	4407040	9150700	5223500	7935500	5032700	6789500	10575500
P51610	Host cell factor 1;HCF N-terminal chain 1;HCF N-terminal chain 2;HCF N-terminal chain 3;HCF N-terminal chain 4;HCF N-terminal chain 5;HCF N-terminal chain 6;HCF C-terminal chain 1;HCF C-terminal chain 2;HCF C-terminal chain 3;HCF C-terminal chain 4;HCF C-terminal chain 5;HCF C-terminal chain 6	6	5	2	3	6	5	2	4	4	1	4	3	9818700	2303070	1410640	5446700	13897420	1618480	2329790	1276660	996450	1682680	3178880	3680160
P36776	Lon protease homolog, mitochondrial	5	0	3	2	3	4	0	2	3	3	0	2	4733360	0	2811810	5283100	2796820	630750	0	964170	3315870	0	1860760	1603970
P22234	Multifunctional protein ADE2;Phosphoribosylaminoimidazole-succinocarboxamide synthase;Phosphoribosylaminoimidazole carboxylase	14	12	11	14	13	15	12	11	11	12	12	7	134933800	37851430	43716100	96304300	88133100	52095100	54838410	23044100	79933180	73586800	41069900	44321870
Q66PJ3	ADP-ribosylation factor-like protein 6-interacting protein 4	1	0	3	1	2	2	0	0	1	0	1	1	1525800	0	3419170	2822000	8977900	1272500	1045900	761070	0	0	1026500	0
Q7L2J0	7SK snRNA methylphosphate capping enzyme	4	4	1	3	3	3	2	2	1	3	3	1	7201070	3579490	1511400	4741000	6684900	2928760	3229340	345980	4222390	2507120	398520	4139100
P09651	Heterogeneous nuclear ribonucleoprotein A1;Heterogeneous nuclear ribonucleoprotein A1, N-terminally processed	6	4	4	5	5	4	4	4	2	2	6	3	31215100	7642380	5786860	11304300	22806900	7445480	23185100	3772300	2515500	14279800	1435820	12018200
Q9H7D7	WD repeat-containing protein 26	2	2	2	1	3	2	0	2	0	3	3	1	4481200	2098290	1474450	3206600	8619400	1302500	6709000	503890	4398100	0	0	5130200
P14866	Heterogeneous nuclear ribonucleoprotein L	5	3	2	4	4	1	2	3	0	2	5	1	7493440	1917060	2739700	522100	8284410	2242780	6120670	289460	2063700	2823780	0	7921400
P26641	Elongation factor 1-gamma	44	42	34	38	44	32	40	45	33	44	38	32	1365668830	534932830	255531820	498026700	1296550500	499301880	642719300	123764000	839814690	764362700	327406000	892319400
Q8WWY3	U4/U6 small nuclear ribonucleoprotein Prp31	32	27	31	34	28	35	36	29	36	33	29	28	379654760	72193510	229197000	301350340	155328300	145179830	124453100	92097540	215099850	208996660	201552500	123610990
Q13596	Sorting nexin-1	1	0	1	75	78	78	72	72	70	76	78	56	1950700	0	1793300	2066933710	3168691000	1444816070	2857710670	445518280	3517680690	2574275780	964344010	1795485400
P35580	Myosin-10	54	55	40	45	65	53	41	58	50	46	53	42	210041200	130185060	97050580	174361130	326443900	80972400	151695360	69188420	150997370	131129990	128360200	194094910
P21333	Filamin-A	96	92	80	85	93	78	88	98	80	90	85	69	732547310	350383890	293182710	373373070	924315310	294389490	457193790	163437390	438667000	519486010	316428310	636172510
P53396	ATP-citrate synthase	25	12	15	27	24	24	20	21	15	24	22	14	129244400	20139320	33586570	124412400	124340100	69605230	54404750	20165490	100990500	75073630	30580630	57876660
P68400;Q8NEV1	Casein kinase II subunit alpha;Casein kinase II subunit alpha 3	7	8	7	8	9	8	5	8	5	6	8	5	20028800	10914850	11478510	28454800	28744900	10687610	19546800	3060500	16793300	15405400	6836270	25045800
P55209	Nucleosome assembly protein 1-like 1	7	4	2	7	5	7	4	4	4	7	3	4	41841300	4243550	1837610	27477000	23675100	14719850	15230100	4466760	30908100	22142500	4394240	12444110
Q15773	Myeloid leukemia factor 2	2	0	1	5	3	2	7	4	5	8	5	4	2705900	0	469610	3901500	6461200	8167600	16521100	5015510	46628800	28334800	9163300	8465600
P11021	78 kDa glucose-regulated protein	38	31	32	37	37	41	36	35	38	39	35	33	344860100	77958210	126670410	325716520	309783000	147968070	225081290	106287030	328871400	281732930	186258510	224799120
Q9BQA1	Methylosome protein 50	45	49	43	45	48	37	47	52	43	47	47	38	6725415500	2405946770	1888347900	2640561000	8672894000	2302230790	5364644910	806415780	5363404400	5348229200	2075938930	6200506690
P55884	Eukaryotic translation initiation factor 3 subunit B	28	25	19	23	25	22	24	28	24	23	23	16	196732300	79577900	49500330	95645500	212645400	64774830	107821370	27024680	109448300	113423810	72084880	125708000
P23381	Tryptophan--tRNA ligase, cytoplasmic;T1-TrpRS;T2-TrpRS	6	2	6	3	3	5	5	4	8	4	4	5	21485970	3515200	25475900	25334140	8633860	4637940	10182600	12293100	13171840	17537670	28527600	6213870
Q15084	Protein disulfide-isomerase A6	6	4	2	6	6	6	4	5	3	5	4	3	22356900	4218210	3731400	16903200	16902500	6150020	14036300	2203330	14425300	9574900	7267030	8629500
P04350;P68371	Tubulin beta-4A chain;Tubulin beta-4B chain	9	8	7	8	10	9	7	8	6	8	7	7	274575400	112303210	107072200	249078600	437148700	95499600	187964400	58395900	181937000	226148700	98326900	210552000
P20618	Proteasome subunit beta type-1	7	7	3	8	5	5	6	4	2	5	6	2	40373500	16748980	9433720	24779600	46010400	21279690	23997390	4254400	27819100	36620200	6554100	16022300
Q9NVA2	Septin-11	7	5	4	5	9	6	4	6	4	5	3	4	21820800	5921320	5466730	17695120	38666260	7996940	9572700	3820880	17873700	11658800	5691158	17018770
Q15276	Rab GTPase-binding effector protein 1	4	5	3	4	4	3	1	2	2	3	3	1	8617500	3504850	3274680	4009750	10500200	2864180	4652600	389480	4862000	2470000	1537470	2485310
O14654	Insulin receptor substrate 4	10	2	0	13	11	6	3	2	3	11	9	2	14399500	899670	0	13538960	32386080	27239040	9735085	921480	13905480	8012900	3068410	1554130
P17987	T-complex protein 1 subunit alpha	40	30	39	37	42	48	35	37	41	40	37	37	244701690	81440010	139848970	459861040	316173550	96858970	162635460	93824540	222607800	167464530	159893140	167105810
P25398	40S ribosomal protein S12	13	9	11	28	36	17	15	15	11	11	17	9	106153370	36652730	31161860	137070940	1025326119	305716880	705334010	28370660	57508850	69976140	45494500	160852400
O43318	Mitogen-activated protein kinase kinase kinase 7	43	38	30	43	40	38	42	36	35	46	42	26	790616100	246399550	183589360	343671080	529457580	333946060	348947650	98253080	582411790	454769090	208709610	337039180
P09651;Q32P51	Heterogeneous nuclear ribonucleoprotein A1;Heterogeneous nuclear ribonucleoprotein A1, N-terminally processed;Heterogeneous nuclear ribonucleoprotein A1-like 2	6	4	3	2	4	3	6	8	4	4	6	2	22398880	6750400	4948900	7388900	17151200	2618270	21500800	2116650	14675300	17085790	5981520	23013600
Q92598	Heat shock protein 105 kDa	22	18	14	19	22	23	18	18	19	26	18	16	68052150	30030750	38037200	95877200	88407830	31347920	61040570	18618420	81998570	59851500	44381540	55357120
O94776	Metastasis-associated protein MTA2	15	8	6	10	12	10	9	8	6	6	8	3	53830300	13627100	6812700	18683250	34344600	18207070	19408980	3536110	16178900	24510340	8860270	19820060
Q15029	116 kDa U5 small nuclear ribonucleoprotein component	18	13	12	14	18	14	13	14	10	16	18	9	64729200	22215300	17229940	37809800	75539100	25383720	46759100	9974770	46099410	39314790	19541070	37870030
Q7Z6Z7	E3 ubiquitin-protein ligase HUWE1	32	25	19	27	29	29	24	25	20	29	24	13	93264880	29951830	21815410	64358630	98435610	33373830	47084540	13084110	62099360	49817650	30726580	45358660
Q9Y5X3	Sorting nexin-5	3	17	3	118	119	126	111	107	101	113	107	99	3876390	54759220	7058200	25225884850	18912202400	13610387610	18726862700	5361325410	23782696200	17912807700	9794703510	13093317300
Q14766	Latent-transforming growth factor beta-binding protein 1	14	5	4	11	12	11	10	8	9	12	12	3	36098740	3512370	3750440	18794500	31774020	14418180	17031780	1903230	23878960	18208800	11779920	10756300
Q6P2Q9	Pre-mRNA-processing-splicing factor 8	20	18	10	17	21	11	11	15	10	12	15	9	59061800	26630170	17170950	29221900	74997900	24979320	36688810	10268580	28185700	25327450	17355030	37775440
P40222	Alpha-taxilin	2	0	3	3	6	6	2	1	3	5	2	3	4141500	0	1683560	11652360	11350640	3092850	1591170	2550990	6432900	3319300	4503780	2186100
Q13200	26S proteasome non-ATPase regulatory subunit 2	9	7	7	9	10	10	8	5	7	8	9	2	51327800	14287930	19289850	67981100	88020100	29185410	50431200	1730770	47640300	32575640	38171100	30977400
P31943	Heterogeneous nuclear ribonucleoprotein H;Heterogeneous nuclear ribonucleoprotein H, N-terminally processed	20	19	14	18	19	14	19	20	17	21	20	11	275568900	78603790	44876030	92382090	221758600	103741980	163609850	23850140	214909000	182967800	56820230	197930500
P15104	Glutamine synthetase	6	2	7	8	8	7	7	5	6	5	4	6	17966200	2470200	10977600	16456860	22679170	10605980	8685800	5643870	12083550	36841490	9017900	7195680
Q14978	Nucleolar and coiled-body phosphoprotein 1	3	1	1	4	3	4	3	2	1	3	4	2	4496850	271580	400290	3665770	2636730	2075170	2103400	818070	2253320	2548900	515960	1584090
Q14974	Importin subunit beta-1	4	1	3	4	4	5	3	3	2	3	2	2	13616800	818340	5154300	18563500	12038300	6566970	4381400	1581970	8622000	4480380	3364900	4201960
O95983	Methyl-CpG-binding domain protein 3	6	5	1	3	3	0	4	4	3	4	4	2	14915310	6539920	2209800	0	8890150	5110510	5922722	493120	11007210	5985930	2608720	5083870
O00203	AP-3 complex subunit beta-1	2	1	0	1	2	3	0	1	0	1	0	0	2737700	597770	0	6860400	1690280	835940	0	0	1560400	0	0	1063300
P62249	40S ribosomal protein S16	6	4	1	6	4	3	3	3	2	4	4	1	22246900	8883970	3227000	6550010	20154360	11906880	12272450	1788800	8956600	7938000	4034030	11017330
Q9Y2J2	Band 4.1-like protein 3;Band 4.1-like protein 3, N-terminally processed	7	5	2	5	5	2	2	4	1	6	4	1	29401300	9061110	3084600	2658190	17945200	8294100	8062850	702600	12463440	4928700	2177700	13873500
Q00839	Heterogeneous nuclear ribonucleoprotein U	27	25	15	22	25	16	19	24	15	20	22	14	199479600	77868070	30595730	54329910	184666700	61631190	93661900	17703200	79441800	78157400	32491400	111925810
P33176	Kinesin-1 heavy chain	29	18	17	22	23	22	20	21	16	22	20	7	93239900	23669120	21892440	47214130	66139770	27409240	37746930	5616480	46979940	39798230	25368780	34656880
P08670	Vimentin	22	20	19	22	21	24	17	19	14	21	22	16	115822000	47973080	58997520	118848730	96689200	51420300	60492150	28480560	77283800	63752100	40405400	67021540
Q8TC07	TBC1 domain family member 15	0	0	0	4	1	6	1	0	0	0	0	0	0	0	0	4130480	1318400	2863880	0	0	0	2221400	0	0
Q99832	T-complex protein 1 subunit eta	27	27	27	30	33	42	28	28	31	29	29	34	180956920	112531950	170852110	617228300	340192180	93007460	153461530	129967120	209111900	121411830	216051700	198486840
P40227	T-complex protein 1 subunit zeta	19	20	24	19	24	29	18	22	24	21	22	23	203232500	87338810	201281060	450221900	336361270	101773300	189743020	117039150	195243100	166687900	216080500	182360100
O75533	Splicing factor 3B subunit 1	22	19	11	20	20	14	18	19	9	19	19	9	67043510	33550350	17183830	25507330	89784250	26799300	48086260	7296390	34237510	39263600	15066710	49060460
O75688	Protein phosphatase 1B	94	81	84	83	86	88	82	82	80	86	87	84	8563337300	2236847910	3029695900	6086981880	6155812640	2335656790	5505191440	1691498370	5566392420	3992249140	3144019280	3457692230
P33993	DNA replication licensing factor MCM7	26	11	11	19	17	22	18	13	14	23	15	10	76977850	13384260	16017850	53330470	47521420	28064540	24414250	10759640	54295900	37141580	20146020	24923890
P23458	Tyrosine-protein kinase JAK1	27	17	14	31	21	22	21	20	17	31	21	10	130143000	18138090	25264790	58738830	67921100	66199810	48537540	9843290	119610460	87654700	30264590	51217120
P07737	Profilin-1	2	0	2	2	3	5	2	2	4	3	5	2	6194600	0	4207200	31332700	8692200	1639700	11833970	3142740	7730400	6108200	7305700	2207710
P49368	T-complex protein 1 subunit gamma	43	41	40	43	48	52	42	47	48	43	42	46	526212860	189984570	355429880	883536880	585152810	220358100	268869830	233142100	344712920	336090080	341894080	350009330
P04843	Dolichyl-diphosphooligosaccharide--protein glycosyltransferase subunit 1	6	5	1	5	6	2	6	6	3	6	6	2	12484400	3574000	531030	1270170	17111700	5167620	7457520	1191090	8742240	11274400	2369370	8515240
P05023;P13637;P50993	Sodium/potassium-transporting ATPase subunit alpha-1;Sodium/potassium-transporting ATPase subunit alpha-3;Sodium/potassium-transporting ATPase subunit alpha-2	2	2	0	0	2	0	0	3	1	0	1	1	4384500	1824980	0	0	4208000	0	475970	518820	0	0	636020	3895130
P62857	40S ribosomal protein S28	7	5	9	6	8	9	5	7	9	5	8	6	58010400	9304330	34198200	58824600	44207700	12168440	31174600	16959410	19604210	26228300	38047300	33197300
Q8N5C8	TGF-beta-activated kinase 1 and MAP3K7-binding protein 3	40	33	29	37	37	32	37	32	27	37	37	19	358868000	87284070	75630830	115150510	183437880	95627270	146047470	30496460	169638870	162948590	78893810	124993070
Q9UBQ5	Eukaryotic translation initiation factor 3 subunit K	7	6	6	7	7	6	6	7	5	6	4	6	43498500	13157680	11400650	24329100	48977400	14585950	20348000	6718790	27626200	27382000	12557800	31942500
O94776;Q13330	Metastasis-associated protein MTA2;Metastasis-associated protein MTA1	0	1	0	1	2	0	2	2	1	2	1	0	0	1401500	0	0	5934900	2729700	2512700	0	3003500	4286100	2238400	5051200
P35244	Replication protein A 14 kDa subunit	1	0	0	0	1	2	1	2	2	1	2	0	1472500	0	0	2769000	3187900	0	3781300	0	1034300	1912200	2825180	2728300
Q00059	Transcription factor A, mitochondrial	1	0	0	1	0	0	1	2	2	1	1	0	882070	0	0	0	0	762270	1968100	0	3049900	1022600	50735700	2009180
Q16576;Q09028	Histone-binding protein RBBP7;Histone-binding protein RBBP4	6	4	2	5	7	5	5	6	4	4	5	3	48571880	11827260	9933800	17721110	46692300	16703700	25873300	5411810	22906400	25390280	10574910	27201120
Q8WXI9	Transcriptional repressor p66-beta	1	1	1	1	2	1	2	3	1	2	1	1	1620300	1228700	370260	963220	3012700	409660	889260	464990	1663070	1614550	668550	3085230
P30566	Adenylosuccinate lyase	1	1	1	0	2	1	1	2	2	0	2	2	2095000	744030	1170100	1360000	4078500	0	1716670	740220	0	1686000	2035350	2104080
P51784	Ubiquitin carboxyl-terminal hydrolase 11	1	0	0	1	0	0	2	0	1	2	1	0	544260	0	0	0	0	410300	140460	0	2603480	720430	454650	0
Q8WXI9;Q86YP4	Transcriptional repressor p66-beta;Transcriptional repressor p66-alpha	0	1	0	0	1	0	1	1	1	1	0	0	0	3900200	0	0	6792000	0	0	0	3052200	4243700	2338900	3574900
P41567;O60739	Eukaryotic translation initiation factor 1;Eukaryotic translation initiation factor 1b	0	1	1	0	0	1	1	1	1	0	0	0	0	713450	2139200	3389500	0	0	0	0	0	1755300	1299400	1177500
P49006	MARCKS-related protein	1	0	1	0	0	1	1	1	1	1	1	1	1507700	0	1544700	1195600	0	0	838300	665380	894700	1440400	755370	452930
P68400	Casein kinase II subunit alpha	2	0	0	1	2	2	1	1	1	1	1	1	5128900	0	0	4605600	4605300	686730	2764900	591700	3656700	2735300	778090	2925400
Q8WUW1	Protein BRICK1	2	0	0	1	2	2	0	2	1	1	0	0	3297900	0	0	1558520	2757000	624740	0	0	870470	0	558850	2050530
O95248	Myotubularin-related protein 5	0	0	0	1	1	1	0	0	1	1	0	0	0	0	0	1359500	3135800	519270	0	0	1074800	0	1290200	0
P15311;P26038;P35241	Ezrin;Moesin;Radixin	0	0	0	1	1	1	1	0	0	0	0	0	0	0	0	1185900	1219200	609920	0	0	0	1257600	0	0
Q01105;P0DME0	Protein SET;Protein SETSIP	0	0	0	1	1	1	1	0	0	1	0	0	0	0	0	5651700	3446900	1665500	0	0	2677300	3166700	0	0
Q16720	Plasma membrane calcium-transporting ATPase 3	1	2	2	1	1	2	2	2	2	1	2	2	2978200	7520340	1179420	19091800	10930000	659760	7857740	11837430	504290	1213400	10032450	7066110
Q96I25	Splicing factor 45	3	1	1	3	4	1	2	3	1	3	3	1	7312300	860360	1141800	1140000	11275300	2419400	4667900	448350	5070300	2088300	1056700	4746700
Q9UNF1	Melanoma-associated antigen D2	3	2	2	5	2	5	3	2	3	5	4	2	4891820	1493340	1684960	6817190	2883080	2855900	2363610	1325290	5904520	3186230	4127110	1767020
O75348	V-type proton ATPase subunit G 1	1	0	0	1	1	1	0	1	0	1	1	1	1811100	0	0	1578900	1349700	1053600	1261900	652480	1015000	0	0	609310
P04264;CON__P04264;P04259	Keratin, type II cytoskeletal 1;Keratin, type II cytoskeletal 6B	1	1	1	0	1	0	1	1	1	0	1	1	11260000	14070000	9725700	0	6305800	0	59201000	9455000	0	18848000	1860800	7341600
P08133	Annexin A6	0	0	1	1	1	1	1	0	0	0	0	1	0	0	1064700	764220	3438100	1488800	0	514980	0	4172400	0	0
P11021;P11142;P54652;P34931	78 kDa glucose-regulated protein;Heat shock cognate 71 kDa protein;Heat shock-related 70 kDa protein 2;Heat shock 70 kDa protein 1-like	2	2	2	2	1	1	2	2	2	2	2	1	10252300	1291460	4970200	6012300	6547600	8615800	5797400	1190300	6691800	9799000	4152400	6826700
P14868	Aspartate--tRNA ligase, cytoplasmic	2	2	1	2	3	2	2	2	1	3	3	1	6294900	2685100	1107600	4918300	11567800	1788300	5577900	738850	4538100	5036200	1700300	3315100
P51148	Ras-related protein Rab-5C	0	1	0	1	1	1	0	1	0	1	1	1	0	233580	0	1379300	921960	438290	1123000	276860	377160	0	0	701590
P55786	Puromycin-sensitive aminopeptidase	0	1	0	1	1	1	0	1	0	1	0	1	0	754550	0	735760	2186100	781550	0	775210	2190200	0	0	1963900
P61254	60S ribosomal protein L26	2	2	1	1	1	1	2	2	1	1	1	0	4413800	2226460	1026700	1051100	3903600	1213600	2028700	0	555830	3162980	825430	4229300
Q07666	KH domain-containing, RNA-binding, signal transduction-associated protein 1	1	1	1	1	0	0	1	1	1	1	0	1	8978900	4130500	3983700	0	0	4734900	0	2883200	4756000	5470100	3600300	8275100
Q13409	Cytoplasmic dynein 1 intermediate chain 2	0	2	1	1	2	2	0	2	1	0	2	1	0	1883900	827760	3352800	7153500	862470	3721700	756500	0	0	851170	3358200
Q15003	Condensin complex subunit 2	1	0	0	1	1	1	1	0	0	1	1	0	1903500	0	0	1267200	2427000	457380	920320	0	1891600	593620	0	0
Q96EY7	Pentatricopeptide repeat domain-containing protein 3, mitochondrial	4	1	0	1	1	1	1	2	2	0	2	0	6706820	687480	0	831020	1740300	581400	2063120	0	0	745550	1220330	2196310
Q9C0C4	Semaphorin-4C	0	0	0	3	0	3	0	0	0	0	0	0	0	0	0	6040000	0	3869400	0	0	0	0	0	0
CON__P02769;CON__P02768-1;P02768	Serum albumin	2	2	2	1	1	1	2	1	2	1	1	2	8022700	4179400	7115600	4529500	3310700	1619600	2597200	5174500	2868700	14660300	7302500	2573200
O75348;O95670	V-type proton ATPase subunit G 1;V-type proton ATPase subunit G 2	2	1	1	0	0	1	1	1	1	2	1	2	4416600	655550	1549600	1100400	0	0	1489800	637480	4283300	1842200	1338500	1415600
P19784	Casein kinase II subunit alpha	2	1	1	2	1	2	1	1	1	2	2	0	4171700	823480	1168100	1973290	1773600	1691350	2562360	0	3095810	2608700	1179600	635120
P52815	39S ribosomal protein L12, mitochondrial	3	3	0	3	4	2	1	2	2	2	4	1	7908940	2452810	0	2732330	17579870	2334110	6099400	649270	2786520	1869400	2955800	4364500
P62308;A8MWD9	Small nuclear ribonucleoprotein G;Putative small nuclear ribonucleoprotein G-like protein 15	2	2	2	3	2	2	2	2	1	2	1	2	37585000	8657900	4770600	19522000	20309890	9595000	12485000	3455700	30773000	30413000	4158300	28108000
P62701	40S ribosomal protein S4, X isoform	1	2	1	2	2	1	1	2	0	1	1	1	5682700	2608350	893530	1656200	6165300	2542300	2275900	484580	1224000	1738100	0	3712500
C9JLW8	Protein FAM195B	1	0	1	1	1	1	0	0	1	1	1	0	1372400	0	775480	903640	1090000	490640	864280	0	913160	0	607370	0
O60684;O15131;P52294	Importin subunit alpha-7;Importin subunit alpha-6;Importin subunit alpha-5;Importin subunit alpha-5, N-terminally processed	0	1	1	1	1	1	0	1	0	1	0	0	0	438690	205950	1067700	1981200	879430	0	0	1127000	0	0	1424800
Q13148	TAR DNA-binding protein 43	2	0	0	2	0	1	1	0	0	1	1	0	2105810	0	0	1121700	0	747890	433280	0	696360	594720	0	0
Q13185;P83916	Chromobox protein homolog 3;Chromobox protein homolog 1	1	1	0	1	1	1	1	0	0	1	1	0	2512700	362340	0	1198000	705010	626660	1240300	0	1429200	2881400	0	0
Q58FG1	Putative heat shock protein HSP 90-alpha A4	1	0	1	1	1	1	0	0	1	0	0	1	2363900	0	2884000	2547900	2412000	1073200	0	407230	0	0	1430800	0
Q99878;Q96KK5;Q9BTM1;Q16777;Q6FI13;P20671;P0C0S8;Q71UI9;P0C0S5;Q93077;Q8IUE6;Q7L7L0;P04908;Q96QV6;P16104	Histone H2A type 1-J;Histone H2A type 1-H;Histone H2A.J;Histone H2A type 2-C;Histone H2A type 2-A;Histone H2A type 1-D;Histone H2A type 1;Histone H2A.V;Histone H2A.Z;Histone H2A type 1-C;Histone H2A type 2-B;Histone H2A type 3;Histone H2A type 1-B/E;Histone H2A type 1-A;Histone H2AX	1	1	0	1	1	1	0	1	0	0	1	0	2931600	893880	0	1298300	1992500	1736300	710130	0	0	0	0	714000
Q9C005	Protein dpy-30 homolog	1	1	0	1	1	1	1	0	0	1	0	1	2651200	624480	0	742340	770230	519850	0	306330	1406600	364460	0	0
Q15365;Q15366;P57721	Poly(rC)-binding protein 1;Poly(rC)-binding protein 2;Poly(rC)-binding protein 3	3	0	0	1	2	3	1	0	1	2	1	0	6983400	0	0	7581120	5877900	994740	2587400	0	3193700	1516700	3137900	0
P49915	GMP synthase [glutamine-hydrolyzing]	1	1	3	2	3	3	2	1	1	2	0	2	755600	352950	1588670	5594900	6389500	882880	0	596490	1706090	1207080	514850	1211200
P52907;P47755	F-actin-capping protein subunit alpha-1;F-actin-capping protein subunit alpha-2	1	2	2	2	2	2	1	2	1	2	1	0	6183100	3132700	2756600	6265000	7332500	2300030	3058900	0	5492800	6012800	2048000	5379300
P68371;Q13885;Q9BVA1	Tubulin beta-4B chain;Tubulin beta-2A chain;Tubulin beta-2B chain	2	1	2	1	3	2	1	2	1	2	2	1	23760300	3971900	4745530	21273600	43189200	8659900	24786300	1791500	19882400	13813000	5959000	22061400
P82930	28S ribosomal protein S34, mitochondrial	3	2	2	2	1	1	3	1	2	0	1	0	8415100	3935600	1887470	1733700	1807500	1902630	2431900	0	0	7069110	3193500	2869900
Q8N4Q1	Mitochondrial intermembrane space import and assembly protein 40	3	3	1	1	1	2	2	2	2	2	2	1	10393400	4707660	376630	1904790	4690200	1185600	5288300	283010	4558360	4352900	3161680	3940440
Q13330;Q9BTC8	Metastasis-associated protein MTA1;Metastasis-associated protein MTA3	3	2	0	0	1	0	1	2	0	0	1	0	7374100	1445630	0	0	1871300	0	1136900	0	0	1867100	0	2421200
Q13557;Q9UQM7;Q13554	Calcium/calmodulin-dependent protein kinase type II subunit delta;Calcium/calmodulin-dependent protein kinase type II subunit alpha;Calcium/calmodulin-dependent protein kinase type II subunit beta	2	1	0	1	1	1	1	0	0	1	1	0	3041020	390270	0	1511300	691320	1046900	1869800	0	1464400	1056400	0	0
Q14766;Q9NS15	Latent-transforming growth factor beta-binding protein 1;Latent-transforming growth factor beta-binding protein 3	1	1	1	1	1	1	0	1	0	1	0	0	3259500	802150	721480	1754000	2889400	1395100	0	0	1794600	0	0	1294100
Q15057;Q96P50	Arf-GAP with coiled-coil, ANK repeat and PH domain-containing protein 2;Arf-GAP with coiled-coil, ANK repeat and PH domain-containing protein 3	2	2	2	2	2	2	1	1	2	2	1	1	11312500	4167500	4973520	11291800	9518000	3375940	3014300	4025800	9426200	6667800	5151340	2838700
Q8N7H5	RNA polymerase II-associated factor 1 homolog	1	1	1	1	1	1	0	0	1	1	0	0	2283700	393670	599330	992480	1823400	809220	0	0	4736000	0	894670	0
Q92783	Signal transducing adapter molecule 1	2	0	1	1	1	1	0	1	0	1	1	0	1963040	0	395560	785150	771730	356630	720750	0	722180	0	0	448500
Q9BTE1	Dynactin subunit 5	1	1	1	1	1	1	0	0	1	0	0	0	2223800	948440	1434500	875080	4085100	1112000	0	0	0	0	1550200	0
Q9NR28	Diablo homolog, mitochondrial	2	2	3	3	1	3	2	1	2	2	3	2	5684200	887980	6064800	4563000	2754600	2605820	4059520	2120600	3488800	4376600	3409300	1511700
P60866	40S ribosomal protein S20	8	5	2	8	5	6	7	4	2	5	4	3	85181400	6501040	2753100	43218640	77838300	48045660	13274570	1966700	10898470	24247570	3423300	8499800
O75369	Filamin-B	20	12	12	13	16	16	11	14	16	15	11	7	42893700	12702060	13675680	31072120	45697500	13391550	16659380	5392520	27303400	18065730	20813620	22587610
P11586	C-1-tetrahydrofolate synthase, cytoplasmic;Methylenetetrahydrofolate dehydrogenase;Methenyltetrahydrofolate cyclohydrolase;Formyltetrahydrofolate synthetase;C-1-tetrahydrofolate synthase, cytoplasmic, N-terminally processed	6	2	3	4	4	4	2	4	2	4	4	3	14722700	1907070	11340500	8563600	8791540	2913980	8087670	2249230	6905450	4220100	3032560	4158130
O95831	Apoptosis-inducing factor 1, mitochondrial	9	5	4	8	6	6	5	6	3	6	6	3	29355200	8521800	6599200	17950170	20052600	10969950	13686770	3429260	14172470	15582300	4788920	13834640
Q5VTR2	E3 ubiquitin-protein ligase BRE1A	5	4	3	2	2	3	1	2	2	4	4	4	8913800	2852720	2099290	3495320	4580700	1480670	3872320	1806990	5123780	1347400	1637650	2863030
P35908;CON__P35908	Keratin, type II cytoskeletal 2 epidermal	5	6	19	8	6	2	0	4	0	1	28	8	7704500	6678760	111368900	2078000	19446000	5708920	206885240	13416960	672120	0	0	4501420
Q9Y5X3;Q9UNH7	Sorting nexin-5;Sorting nexin-6;Sorting nexin-6, N-terminally processed	0	0	0	3	2	2	3	3	3	4	2	2	0	0	0	10809960	56377800	120500970	61902700	10741520	85290000	77427910	24860750	39318430
P04080	Cystatin-B	0	1	0	1	0	1	2	1	1	0	1	1	0	2945000	0	1428500	0	561910	1139200	1582600	0	5249600	1636400	1235500
P04350;P68371;A6NNZ2;Q9H4B7;P07437;Q13885;Q9BVA1;Q9BUF5;Q3ZCM7	Tubulin beta-4A chain;Tubulin beta-4B chain;Tubulin beta-8 chain-like protein LOC260334;Tubulin beta-1 chain;Tubulin beta chain;Tubulin beta-2A chain;Tubulin beta-2B chain;Tubulin beta-6 chain;Tubulin beta-8 chain	4	1	1	4	4	3	4	3	2	3	4	3	61872700	7758200	9673800	29655800	80058500	24670900	40903290	5101520	33811100	26488850	10175430	37602900
CON__P08779;P08779;CON__Q9Z2K1;CON__Q3ZAW8;CON__A2A4G1;CON__P19001;CON__P35900;CON__Q9D312;P35900;CON__Q8N1A0;Q8N1A0;CON__P19012;P19012;CON__P02533;P02533;CON__Q6IFX2;CON__Q61782;CON__Q04695;Q04695	Keratin, type I cytoskeletal 16;Keratin, type I cytoskeletal 20;Keratin-like protein KRT222;Keratin, type I cytoskeletal 15;Keratin, type I cytoskeletal 14;Keratin, type I cytoskeletal 17	0	0	0	0	0	0	1	1	0	0	0	0	0	0	0	0	0	0	0	0	0	2441200	0	1317700
P00403	Cytochrome c oxidase subunit 2	0	0	0	0	0	0	1	1	0	0	0	0	0	0	0	0	0	0	0	0	0	1839800	0	789580
Q8WWR9	Pancreatic progenitor cell differentiation and proliferation factor-like protein	0	0	0	0	0	0	1	1	0	1	1	0	0	0	0	0	0	0	5967600	0	5500000	6798300	0	6455300
Q96A33	Coiled-coil domain-containing protein 47	0	0	0	0	0	0	1	1	0	0	0	0	0	0	0	0	0	0	0	0	0	1886300	0	1272400
Q9NVS9	Pyridoxine-5-phosphate oxidase	4	2	1	3	3	1	4	3	2	4	2	1	29748800	2549900	1696500	2004600	13823960	9295900	6906200	530820	14933500	16390900	1457690	13352500
P60842;Q14240	Eukaryotic initiation factor 4A-I;Eukaryotic initiation factor 4A-II;Eukaryotic initiation factor 4A-II, N-terminally processed	3	2	3	2	2	3	3	3	3	2	3	3	9464400	1808690	4725100	12482900	6144100	3245800	8190800	2922770	8074200	17470800	4095600	6936200
P11940	Polyadenylate-binding protein 1	0	1	0	0	0	0	1	1	0	0	0	0	0	755140	0	0	0	0	0	0	0	710010	0	1122800
P32969	60S ribosomal protein L9	1	0	0	0	0	0	1	1	0	0	2	0	2179600	0	0	0	0	0	3252360	0	0	1082000	0	509690
P62873	Guanine nucleotide-binding protein G(I)/G(S)/G(T) subunit beta-1	1	0	0	0	0	0	1	1	0	0	0	0	2154600	0	0	0	0	0	0	0	0	1298200	0	1191700
Q7L5D6	Golgi to ER traffic protein 4 homolog	0	1	0	0	0	0	0	1	1	0	0	0	0	721600	0	0	0	0	0	0	0	0	621980	1008300
O14979	Heterogeneous nuclear ribonucleoprotein D-like	1	1	1	0	1	1	1	2	1	2	1	0	3082400	1141800	1196000	1373100	3522600	0	1948400	0	3141600	1643800	1228100	3492100
CON__P13645;P13645;CON__P02535-1;CON__Q2M2I5;Q2M2I5	Keratin, type I cytoskeletal 10;Keratin, type I cytoskeletal 24	0	1	1	0	0	0	1	1	0	0	0	0	0	1193000	1493400	0	0	0	0	0	0	3824700	0	686620
O00571;O15523;Q9NQI0	ATP-dependent RNA helicase DDX3X;ATP-dependent RNA helicase DDX3Y;Probable ATP-dependent RNA helicase DDX4	0	1	1	0	0	0	1	1	0	0	0	0	0	2367500	3394500	0	0	0	0	0	0	3565100	0	2698000
O95202	LETM1 and EF-hand domain-containing protein 1, mitochondrial	0	0	0	1	0	1	0	0	0	0	0	0	0	0	0	2070300	0	1549600	0	0	0	0	0	0
P04264;CON__P04264;P35908;CON__P35908	Keratin, type II cytoskeletal 1;Keratin, type II cytoskeletal 2 epidermal	0	1	1	0	0	0	1	1	0	0	1	1	0	1248000	3646200	0	0	0	23246000	6108700	0	1588700	0	6153600
P05023;P13637	Sodium/potassium-transporting ATPase subunit alpha-1;Sodium/potassium-transporting ATPase subunit alpha-3	1	1	0	1	2	1	1	1	0	1	2	0	2606100	1474000	0	1185400	3614900	1106200	2253840	0	2570600	1419900	0	1685700
P08047	Transcription factor Sp1	1	1	0	0	0	0	1	1	0	1	1	0	1837700	989270	0	0	0	0	781630	0	1269900	996050	0	1154100
P08069;P06213	Insulin-like growth factor 1 receptor;Insulin-like growth factor 1 receptor alpha chain;Insulin-like growth factor 1 receptor beta chain;Insulin receptor;Insulin receptor subunit alpha;Insulin receptor subunit beta	0	0	0	1	0	1	0	0	0	0	0	0	0	0	0	1632400	0	1446300	0	0	0	0	0	0
P13861	cAMP-dependent protein kinase type II-alpha regulatory subunit	0	0	0	1	0	1	0	0	0	0	0	0	0	0	0	402770	0	497260	0	0	0	0	0	0
P60981	Destrin	2	2	2	2	3	3	2	2	2	2	3	2	3993100	1837170	2663930	6287150	10520800	1798500	5632100	1887290	2548170	1996900	4080600	4975700
P62851	40S ribosomal protein S25	1	1	0	2	2	0	1	1	0	1	1	0	999800	812090	0	0	3752200	1787970	508200	0	638590	915690	0	779660
Q01082	Spectrin beta chain, non-erythrocytic 1	1	1	0	1	2	1	1	1	0	1	0	0	1486300	904250	0	1037100	1043630	318050	0	0	362500	670010	0	554170
Q96AE4;Q96I24	Far upstream element-binding protein 1;Far upstream element-binding protein 3	1	0	1	0	0	0	0	1	1	0	0	1	962640	0	753140	0	0	0	0	304780	0	0	494610	460490
Q9BV86	N-terminal Xaa-Pro-Lys N-methyltransferase 1;N-terminal Xaa-Pro-Lys N-methyltransferase 1, N-terminally processed	0	0	0	0	1	1	0	0	0	0	1	1	0	0	0	1127600	1247800	0	978270	569300	0	0	0	0
Q9NTG1	Polycystic kidney disease and receptor for egg jelly-related protein	0	1	1	0	0	0	0	1	1	1	0	1	0	1451900	2095600	0	0	0	0	1336900	1936400	0	2381400	2543800
Q9NWV8	BRISC and BRCA1-A complex member 1	1	1	0	2	1	1	1	0	1	1	1	2	1316400	159730	0	945410	936200	1104810	1137600	556360	949250	671050	478210	0
Q8IWS0	PHD finger protein 6	2	2	0	2	3	0	1	2	0	1	4	0	3134000	1223500	0	0	4344530	1623790	3268810	0	1204100	746280	0	2646300
O94906	Pre-mRNA-processing factor 6	1	0	0	0	2	2	0	0	0	0	1	0	720610	0	0	1071540	2846000	0	959880	0	0	0	0	0
Q15751	Probable E3 ubiquitin-protein ligase HERC1	1	0	0	1	1	0	0	0	0	1	0	0	15586000	0	0	0	15285000	16595000	0	0	10438000	0	0	0
Q6UXN9	WD repeat-containing protein 82	1	0	0	1	1	0	0	0	0	0	0	0	1361100	0	0	0	1781600	659150	0	0	0	0	0	0
Q9HCN4	GPN-loop GTPase 1	0	0	1	0	1	1	0	0	0	0	0	1	0	0	9971900	4735700	37670000	0	0	15661000	0	0	0	0
Q9NZL4	Hsp70-binding protein 1	1	0	2	0	0	0	1	1	0	0	0	0	384850	0	5828600	0	0	0	0	0	0	309470	0	511780
Q5T5U3	Rho GTPase-activating protein 21	5	3	2	7	2	4	5	2	2	4	4	3	15134900	2127430	1644950	6753800	3325960	6678730	4031820	1851650	4871000	5145080	2025850	1909940
P11940;Q9H361	Polyadenylate-binding protein 1;Polyadenylate-binding protein 3	3	3	3	3	3	3	3	2	2	3	2	3	5277750	3860810	2021130	3363540	8571590	2643980	3414680	1209290	4472190	4270360	1273110	3772460
Q9Y2Q9	28S ribosomal protein S28, mitochondrial	4	4	3	3	4	4	2	4	3	3	3	3	12210800	4870110	3511280	6980280	14284700	3557490	4860400	2408220	4358430	1968800	4414240	9025200
O14639	Actin-binding LIM protein 1	2	0	2	0	0	0	0	1	1	1	0	1	4538100	0	3471000	0	0	0	0	962000	1037700	0	1081100	881530
O76094	Signal recognition particle subunit SRP72	3	1	0	2	0	2	1	0	1	1	1	0	5211630	406450	0	2754000	0	960230	396680	0	640180	863670	500210	0
P08238;Q58FF7;P07900;Q58FG0	Heat shock protein HSP 90-beta;Putative heat shock protein HSP 90-beta-3;Heat shock protein HSP 90-alpha;Putative heat shock protein HSP 90-alpha A5	1	0	1	1	0	1	0	0	0	0	0	0	1574400	0	1199700	1186500	0	1146100	0	0	0	0	0	0
P35222	Catenin beta-1	2	0	0	1	1	0	0	0	0	2	0	0	3171600	0	0	0	1429600	1038400	0	0	2065970	0	0	0
P68371;A6NNZ2;Q9H4B7;P07437;Q13885;Q9BVA1;Q3ZCM7	Tubulin beta-4B chain;Tubulin beta-8 chain-like protein LOC260334;Tubulin beta-1 chain;Tubulin beta chain;Tubulin beta-2A chain;Tubulin beta-2B chain;Tubulin beta-8 chain	0	1	1	0	1	1	0	0	0	0	0	0	0	2490500	1869200	4723400	8121600	0	0	0	0	0	0	0
Q96AG4	Leucine-rich repeat-containing protein 59	1	1	0	0	2	2	0	0	0	2	0	1	1898000	696320	0	2567300	5538200	0	0	574160	2805460	0	0	0
Q96PU8	Protein quaking	2	0	0	1	0	1	0	0	0	0	0	0	1326140	0	0	440660	0	371580	0	0	0	0	0	0
Q96QK1	Vacuolar protein sorting-associated protein 35	1	1	0	1	0	1	0	0	0	0	0	1	2108500	481230	0	2038600	0	478940	0	331460	0	0	0	0
Q99996	A-kinase anchor protein 9	0	1	1	1	1	0	0	0	0	0	1	0	0	737860	1312200	0	1023600	3930400	2222300	0	0	0	0	0
O60216	Double-strand-break repair protein rad21 homolog	2	3	1	2	3	1	1	3	0	3	3	0	5206100	2119790	1312800	1788100	11438700	2546590	4519300	0	5125900	2623900	0	6664510
P07900;Q14568	Heat shock protein HSP 90-alpha;Heat shock protein HSP 90-alpha A2	2	0	1	1	1	0	0	0	0	0	0	0	5822800	0	4229000	0	2460400	1904900	0	0	0	0	0	0
P09234	U1 small nuclear ribonucleoprotein C	3	1	1	1	2	1	1	1	0	1	2	1	9757600	1433800	1245000	1437700	7796100	1719400	4675560	967380	2061600	6215300	0	4449800
O60271	C-Jun-amino-terminal kinase-interacting protein 4	6	4	3	4	3	4	3	3	3	3	3	4	16845700	5261180	5374480	11009200	9882300	4989080	5630400	2771570	6753300	6909600	4716400	6173900
O60841	Eukaryotic translation initiation factor 5B	3	1	2	2	0	2	1	0	1	3	1	0	9432600	583820	2485000	5520200	0	2271530	844190	0	7825500	1090800	1569800	0
Q9Y5B9	FACT complex subunit SPT16	16	8	7	6	8	8	8	10	8	9	9	4	66166650	15793940	17551550	26155100	33674990	14377010	26288500	5176960	29163020	23301030	15959410	23879360
Q9BWU0	Kanadaptin	7	4	4	4	4	5	4	2	3	3	4	1	17419270	4065440	3729790	7048460	11137600	4295730	8852170	721030	6285900	8364200	5392200	3712000
Q15365	Poly(rC)-binding protein 1	3	3	3	1	2	5	1	1	4	1	1	1	5381200	2704530	3390100	14520100	4077500	1163100	1919600	695690	864600	1525500	5861100	1639300
P68104;Q5VTE0	Elongation factor 1-alpha 1;Putative elongation factor 1-alpha-like 3	16	12	14	13	13	17	12	13	16	12	14	11	289742100	79182750	124122670	329427300	204003500	83983220	139841100	83724280	180116700	146396800	171548630	118412300
Q14204	Cytoplasmic dynein 1 heavy chain 1	5	3	1	3	8	2	1	2	1	2	4	1	18577100	3678120	1096100	8093900	20050490	6522630	8516270	1971000	10634540	7080300	2380400	4189300
P35527;CON__P35527	Keratin, type I cytoskeletal 9	36	23	42	1	19	0	2	25	2	10	61	42	408057310	59783660	325365580	0	102252110	1958000	1613072860	252672300	22921790	5638000	4524200	114629010
P48444	Coatomer subunit delta	13	9	7	12	10	11	8	10	8	12	11	3	50323900	19538980	11872680	29858340	61284420	17740030	25046710	6034370	31711090	23660660	18770530	34639500
P53618	Coatomer subunit beta	10	7	4	7	10	8	3	10	5	8	7	2	29176000	7527630	6191290	17415100	41993300	5561590	15227770	1641110	21506910	9362850	10818130	19309950
P35998	26S protease regulatory subunit 7	15	19	11	15	20	20	15	16	17	20	17	11	83107700	47770630	25096180	88100770	121371300	34594010	64604540	18200940	64600110	53591500	38380550	57991700
P25705	ATP synthase subunit alpha, mitochondrial	20	9	9	15	19	12	15	17	9	15	15	9	122303400	19854070	13116800	38164000	88955000	33149490	44730370	10974840	46510230	54573900	15182830	60638920
P62191	26S protease regulatory subunit 4	12	9	7	13	14	10	11	11	10	12	8	7	51126340	17939510	12990050	47113100	59285940	17605200	27189890	7635630	37124720	38724510	19130590	31140790
P12956	X-ray repair cross-complementing protein 6	21	21	14	18	23	19	18	21	16	17	18	12	109050900	51704920	38471380	46384500	125631400	35308420	56372250	11909370	53336100	61705400	41531240	96682700
P15880	40S ribosomal protein S2	4	5	3	5	5	4	3	5	1	5	4	1	25532500	12153900	3990700	8791800	31642600	13282200	19604600	742110	19195300	7748700	1766700	26857400
Q14008	Cytoskeleton-associated protein 5	19	10	14	16	13	24	10	13	15	14	12	16	53933230	7179346	25698600	72390000	31204240	17705400	17864100	17498160	25656840	16654900	31705300	21894640
Q7KZF4	Staphylococcal nuclease domain-containing protein 1	6	2	5	6	3	7	4	3	4	4	4	6	12234900	1147850	6225920	13257120	5183000	4662690	4841930	3905230	6254210	7899800	4628460	3381930
Q9Y2L1	Exosome complex exonuclease RRP44	4	0	1	4	1	3	1	1	1	2	3	1	7590300	0	302490	3734650	1919000	2091640	1727520	313660	2185910	634500	472690	1145200
P62269	40S ribosomal protein S18	7	4	0	6	2	4	4	2	1	2	4	1	25544000	4929610	0	7674300	9023200	7742960	5540960	1790200	3685170	9738700	863450	3543900
P30153	Serine/threonine-protein phosphatase 2A 65 kDa regulatory subunit A alpha isoform	11	8	5	10	11	6	13	11	8	11	10	7	43138600	8268090	7543200	13613400	38693600	14076700	26169700	5050810	27995500	34071000	8128900	24570930
Q14697	Neutral alpha-glucosidase AB	16	6	8	10	9	14	10	7	11	12	11	8	70293200	8139160	21440000	47792900	34859970	24948090	36910670	13871510	46062980	36715000	26087320	20180000
O75643	U5 small nuclear ribonucleoprotein 200 kDa helicase	25	23	20	24	27	26	21	27	21	20	23	15	84466330	30473100	29465410	81117330	126540100	47382780	72469900	15925670	73503930	64321570	36781260	92451200
P49902	Cytosolic purine 5-nucleotidase	16	10	3	14	18	9	12	11	8	19	20	3	87718000	16470250	5391260	19158100	158552300	33930120	89221510	1779580	125416000	49443400	14699890	22911650
P63220	40S ribosomal protein S21	4	4	3	4	5	5	4	4	3	5	4	2	11710000	5702480	5399700	16365800	20669000	5214090	9115500	2781200	10948700	7927800	8042700	11977300
P06733	Alpha-enolase	12	9	18	10	14	21	12	14	22	13	17	15	49322610	16708780	66050380	137334650	53444830	17399010	65840610	38303210	53960430	62459370	67289890	36176090
Q13428	Treacle protein	5	4	2	5	7	6	5	5	5	4	3	1	13368900	5055690	4216600	12868400	19674340	5230870	6366700	1311600	8557700	6403310	7632780	10283100
Q9NXV2	BTB/POZ domain-containing protein KCTD5	31	32	20	28	31	25	29	31	27	33	34	22	1406087400	671396320	209848830	623319900	1725090615	482892350	1958292500	165901420	1758315020	1244880100	361600810	1788633300
P45880	Voltage-dependent anion-selective channel protein 2	0	0	0	0	0	0	2	1	0	0	0	0	0	0	0	0	0	0	0	0	0	3189900	0	808870
P53007	Tricarboxylate transport protein, mitochondrial	0	0	0	0	0	0	2	1	0	3	4	2	0	0	0	0	0	0	1899280680	906016910	2776074400	68343000	0	802620
P61626	Lysozyme C	0	0	0	0	0	0	2	1	0	0	0	0	0	0	0	0	0	0	0	0	0	2032820	0	1223400
P63173	60S ribosomal protein L38	7	4	4	7	8	6	6	8	4	5	6	4	36623500	8329700	7675120	22197800	56255700	16424370	23994700	4508320	22037760	17146230	7642500	32834510
P22061	Protein-L-isoaspartate(D-aspartate) O-methyltransferase	6	6	4	6	8	7	5	8	5	5	6	6	35847300	16702870	9418500	33763800	70202700	10562600	44299100	8020560	20042900	21081200	14838300	43993630
Q96DG6	Carboxymethylenebutenolidase homolog	6	5	2	4	5	3	4	6	5	6	6	3	30694080	21280740	2820100	15937000	47589800	7650200	32331930	6012500	36662100	10479900	16133890	33648580
P16403	Histone H1.2	2	1	1	0	2	1	2	2	2	1	2	0	7810300	1960000	681340	1301300	6009300	0	3163100	0	1601200	5275200	2518300	4694800
Q9BSD7	Cancer-related nucleoside-triphosphatase	2	0	0	3	2	2	3	1	0	3	2	1	3901800	0	0	1860090	2421430	2045520	1829980	449000	3117590	2154820	0	1660200
O15355	Protein phosphatase 1G	6	1	2	3	1	4	5	2	4	5	3	1	7418700	533530	910180	5217910	1142200	2003000	1401670	575400	4652680	6896370	2216463	2263440
O95881	Thioredoxin domain-containing protein 12	3	4	0	0	6	0	0	7	2	0	6	2	4878190	18397100	0	0	45780800	0	30099400	2447800	0	0	4973430	49006000
Q9Y266	Nuclear migration protein nudC	2	1	4	3	3	6	2	3	4	3	3	3	7906600	866190	5283750	12995700	6830400	5152150	3671920	3969010	5234750	2104620	8372900	2557230
P41227	N-alpha-acetyltransferase 10	1	0	1	1	2	3	1	1	1	1	0	1	1412800	0	1166300	5802100	2571600	808570	0	609450	1552300	1528100	651400	589370
P41252	Isoleucine--tRNA ligase, cytoplasmic	3	1	1	2	4	3	2	3	1	3	4	1	4332540	643560	1315900	2437900	7079900	971950	4698440	421000	4113600	2027150	335460	4443870
Q04724;Q04727;Q04725;Q04726	Transducin-like enhancer protein 1;Transducin-like enhancer protein 4;Transducin-like enhancer protein 2;Transducin-like enhancer protein 3	2	2	1	3	3	3	2	3	1	2	3	0	7043500	736390	971040	6558700	8281100	3940600	6851660	0	4471000	3139400	1131800	4273510
P08238;Q58FF7;P07900	Heat shock protein HSP 90-beta;Putative heat shock protein HSP 90-beta-3;Heat shock protein HSP 90-alpha	10	6	9	10	8	11	9	8	9	9	7	6	179862100	33986750	98430250	150470730	134308750	82152880	86158400	42718890	122588260	116327660	87484470	73507880
O95613	Pericentrin	1	1	2	0	1	0	2	1	1	0	1	1	3494500	509290	5278700	0	1814000	0	58316	7144900	0	859801	1011900	344410
Q01105	Protein SET	0	0	0	1	0	2	0	0	0	0	0	0	0	0	0	14036400	0	653410	0	0	0	0	0	0
Q13185	Chromobox protein homolog 3	4	1	2	5	3	2	3	2	2	3	4	1	9581100	757370	2328100	3489800	8228400	4221370	6674800	388850	5083900	4694800	1720830	4179200
Q15459	Splicing factor 3A subunit 1	6	7	6	7	10	5	5	9	5	7	10	3	26337900	13871120	7916190	12520810	36294100	8623290	27246900	3701410	17655900	14793300	8250590	25189900
Q8IWX8	Calcium homeostasis endoplasmic reticulum protein	5	2	1	4	4	3	3	4	1	4	3	2	11254110	3141730	1511700	5135870	9009300	3262390	4071280	902410	6290300	5102250	1253600	6922300
O75717	WD repeat and HMG-box DNA-binding protein 1	7	8	7	10	10	7	6	10	5	9	9	4	18506600	5508350	5931930	9375600	19902660	6928110	9266220	1913880	10217130	7614610	4457060	10237830
O60506	Heterogeneous nuclear ribonucleoprotein Q	2	1	1	2	3	1	1	1	1	2	3	1	5024900	1405200	897130	1361800	10149800	1913900	5608200	858000	4619200	1252500	1549500	2840000
P06493	Cyclin-dependent kinase 1	2	2	0	2	2	2	0	2	1	3	1	1	2713600	1234460	0	2748210	3076700	1247260	543060	392960	3736390	0	679070	2647670
O60573	Eukaryotic translation initiation factor 4E type 2	1	0	0	2	0	1	0	0	0	1	0	0	1228500	0	0	796150	0	1307030	0	0	735350	0	0	0
P06396;CON__Q3SX14	Gelsolin	1	0	0	0	1	2	0	0	0	2	0	0	1759100	0	0	27724000	50842000	0	0	0	78250100	0	0	0
Q9H0U9	Testis-specific Y-encoded-like protein 1	0	0	1	1	0	2	0	0	0	0	0	0	0	0	1162900	3666100	0	1583300	0	0	0	0	0	0
Q9UNZ2	NSFL1 cofactor p47	2	0	0	1	1	2	1	0	0	0	0	0	12670500	0	0	5979000	7355000	6402500	0	0	0	5576600	0	0
O75122;Q7Z460	CLIP-associating protein 2;CLIP-associating protein 1	1	2	0	3	1	1	1	0	1	0	0	0	792570	707310	0	1572600	1644900	1800010	0	0	0	778260	483350	0
Q3SY69	Mitochondrial 10-formyltetrahydrofolate dehydrogenase	2	2	0	2	2	1	0	2	0	1	3	1	7332900	1427180	0	3481200	18509100	3248560	7909600	322070	851500	0	0	11593500
P28340	DNA polymerase delta catalytic subunit	3	0	0	2	2	0	1	0	0	2	0	0	4970440	0	0	0	2697620	2279360	0	0	2268540	915650	0	0
Q9UN86	Ras GTPase-activating protein-binding protein 2	1	2	2	2	2	2	2	1	0	1	2	1	2800700	2055630	1480530	2063350	5857900	1401810	2729090	475900	1188700	2980720	0	1221700
P06730	Eukaryotic translation initiation factor 4E	2	1	0	1	0	2	0	0	0	0	0	0	2250440	1094900	0	1629630	0	625370	0	0	0	0	0	0
P19387	DNA-directed RNA polymerase II subunit RPB3	2	1	0	2	0	1	0	0	0	0	0	0	3622400	223680	0	822140	0	1291530	0	0	0	0	0	0
P62263	40S ribosomal protein S14	5	5	2	4	6	5	4	4	1	5	3	1	18617800	7794630	2912700	7444200	31673100	5462920	7009000	864500	9073850	8303800	923660	10852000
Q13464;O75116	Rho-associated protein kinase 1;Rho-associated protein kinase 2	7	5	7	7	6	6	5	5	6	6	4	5	42309500	8708810	17899540	31864700	29970100	15094320	18983760	8494160	27292480	20285200	19129750	27170600
Q8TD19	Serine/threonine-protein kinase Nek9	4	4	2	2	4	4	2	3	2	4	4	2	5424650	2289620	1817650	4402960	5726470	2132900	3388140	745570	4472020	1926650	1680370	3015750
Q96C36	Pyrroline-5-carboxylate reductase 2	3	1	1	2	1	2	1	1	0	1	2	1	9041600	927400	621580	4642300	2931500	1805960	2365850	298980	3041800	1937900	0	1486400
Q8TEQ6	Gem-associated protein 5	6	3	3	3	3	5	3	2	3	3	4	3	10995410	2050600	3557850	7865090	7656000	2934730	5955650	1991970	4028000	4616480	3231830	3730400
Q9H3G5	Probable serine carboxypeptidase CPVL	3	2	1	0	2	2	0	1	0	1	1	0	2933670	1070080	434090	1348080	3700400	0	602880	0	725190	0	0	904850
P23396	40S ribosomal protein S3	15	10	6	10	12	9	10	8	7	13	13	3	116113100	20065250	8680620	25743550	72391500	24160700	54785700	2095020	47631930	34657630	10398250	26517080
Q9Y285	Phenylalanine--tRNA ligase alpha subunit	5	5	2	6	3	3	2	3	1	4	4	1	22300500	7531940	4584700	6754200	15425000	10293080	13985910	868090	12380000	7094000	1898200	15009900
P78347	General transcription factor II-I	12	10	5	7	8	8	6	8	6	10	7	6	31695690	16065950	6747990	19884700	24417900	10432340	14335700	6171810	22407200	12143000	9748150	16902920
Q16875	6-phosphofructo-2-kinase/fructose-2,6-bisphosphatase 3;6-phosphofructo-2-kinase;Fructose-2,6-bisphosphatase	36	35	30	36	33	30	30	33	27	31	32	21	496061640	195639300	156003430	196390700	255586510	245680240	216287590	63923020	283733100	277933700	122780240	239659900
P25205	DNA replication licensing factor MCM3	14	10	5	14	14	10	13	12	10	13	13	8	99358810	28217220	11652210	38106290	54158960	34221390	48455430	12649860	70068460	43216750	22508720	59147810
P11940;Q13310	Polyadenylate-binding protein 1;Polyadenylate-binding protein 4	1	2	1	1	3	1	2	3	3	2	2	1	2947200	2405900	1677000	2912700	12591900	1234000	4247400	628910	3634000	3733600	2840910	7016900
P14625;Q58FF3	Endoplasmin;Putative endoplasmin-like protein	2	0	1	2	3	3	2	2	1	2	3	1	5823590	0	1200200	5666000	5718930	3646600	3656510	866690	4707400	4428900	1333900	2123470
Q9GZT3	SRA stem-loop-interacting RNA-binding protein, mitochondrial	3	1	2	2	1	2	2	2	4	3	3	4	8517600	1465100	3680000	4944300	3537400	2433570	5041050	2579300	8888680	2944200	4767370	3911200
Q14681	BTB/POZ domain-containing protein KCTD2	14	16	9	14	16	14	13	16	12	16	15	6	163415250	159556630	36801000	66951380	364455200	108038540	348774190	24720300	249327840	178900110	54710070	303049200
O14974	Protein phosphatase 1 regulatory subunit 12A	4	1	1	2	3	3	2	1	2	1	2	2	5854400	702930	551660	4434320	5297400	796710	1990480	979690	928350	1514680	1607610	1524900
P42766	60S ribosomal protein L35	3	3	1	3	3	2	1	2	2	3	2	1	11551400	6439700	1415100	3931600	14978200	4054800	6375900	821890	7203700	2276500	2590310	6286500
P84103	Serine/arginine-rich splicing factor 3	3	2	3	3	3	2	2	3	0	3	3	0	20369400	3202300	3957290	3292700	18278800	7337100	14385500	0	11847300	7101000	0	12514400
O43172	U4/U6 small nuclear ribonucleoprotein Prp4	6	4	4	4	6	3	2	5	3	4	3	1	12741400	3212320	7778870	3706570	15387600	3226480	4779500	555250	5808770	2168660	2465070	6824750
Q7Z353	Highly divergent homeobox	15	10	10	11	11	9	11	10	7	12	11	7	59219300	18448020	18439870	22986640	43259300	15578880	38183340	6650380	42455100	30390540	19476160	29639820
P31943;P55795	Heterogeneous nuclear ribonucleoprotein H;Heterogeneous nuclear ribonucleoprotein H, N-terminally processed;Heterogeneous nuclear ribonucleoprotein H2	8	8	7	8	9	6	9	11	6	9	8	5	134751100	38810700	26450830	52480000	119289400	58343590	71476690	8742390	90500800	92860100	26067810	104148320
Q9Y383	Putative RNA-binding protein Luc7-like 2	6	3	3	3	6	2	3	4	1	3	4	0	18297600	3586710	2923180	3481300	16118900	5110380	8271290	0	5908360	5769840	1457000	7475810
Q6UB35	Monofunctional C1-tetrahydrofolate synthase, mitochondrial	8	0	7	3	1	12	3	0	10	3	1	9	14863730	0	8309880	29246100	702140	1082090	1009800	6117540	3236060	1274470	14593580	0
P62333	26S protease regulatory subunit 10B	16	13	12	14	20	16	14	18	11	16	13	8	63233940	30932950	22611760	65736400	103212100	26574960	40717500	7311260	42477700	40049500	21243170	54198880
P22102	Trifunctional purine biosynthetic protein adenosine-3;Phosphoribosylamine--glycine ligase;Phosphoribosylformylglycinamidine cyclo-ligase;Phosphoribosylglycinamide formyltransferase	13	8	9	14	14	15	14	13	12	13	12	6	30170600	9773250	15311850	40011910	52839240	14373230	28643000	6087650	28813040	29917390	22880700	23311350
Q09028	Histone-binding protein RBBP4	12	9	8	8	14	10	11	14	11	12	13	9	106203600	25431560	32809400	51411500	114219400	24791740	64794900	16172580	64402900	61704100	34936700	86684100
P23284	Peptidyl-prolyl cis-trans isomerase B	7	2	7	6	8	9	6	7	6	6	4	6	17301990	6500500	18447830	36663200	32381300	8326940	11425700	8721760	17341160	8071330	24696920	28321970
Q9Y6A5	Transforming acidic coiled-coil-containing protein 3	7	3	3	6	6	8	5	6	5	5	5	4	13918240	3494950	4851910	12940830	14251300	4935840	5895440	2608580	7225700	4273980	6831420	8108080
O75821	Eukaryotic translation initiation factor 3 subunit G	12	9	9	11	11	12	10	11	9	10	8	9	121046900	42142830	57647400	81024690	95833800	55736150	58091300	33263090	86757400	87713800	54912870	78523500
O95757	Heat shock 70 kDa protein 4L	15	9	5	10	11	10	10	8	9	9	13	4	25096130	4939940	5532520	11320370	15324960	5897110	15529010	2137520	16341810	14222270	7681470	10645980
Q96N67	Dedicator of cytokinesis protein 7	6	6	5	7	4	6	6	4	3	3	2	1	15041200	10186020	9421100	14153800	14211300	10271710	4913200	918300	11105700	12705200	7007200	8601440
P62805	Histone H4	3	1	0	4	0	0	4	3	1	0	0	0	3724400	441390	0	0	0	6088300	0	0	0	5142350	321430	11657900
Q14011	Cold-inducible RNA-binding protein	4	5	5	6	5	3	3	5	2	5	5	2	23992200	14548760	19857000	9784600	29565800	15675200	27063900	1979020	31963200	17878700	5709700	22976900
O43143	Pre-mRNA-splicing factor ATP-dependent RNA helicase DHX15	5	1	1	3	5	5	3	4	2	6	4	0	9380200	617030	2718800	9414300	12494400	2031640	4327020	0	8599040	3707810	2133050	5796990
P04259;CON__P02538;P02538;CON__P48668;P48668;CON__P13647;P13647;CON__P04259	Keratin, type II cytoskeletal 6B;Keratin, type II cytoskeletal 6A;Keratin, type II cytoskeletal 6C;Keratin, type II cytoskeletal 5	2	1	1	0	0	0	3	1	0	0	2	1	1737030	1270900	862280	0	0	0	8707100	1063800	0	41928100	0	737080
Q04637;O43432	Eukaryotic translation initiation factor 4 gamma 1;Eukaryotic translation initiation factor 4 gamma 3	5	2	2	3	5	3	3	2	2	3	5	1	16368800	2252730	2508600	9871200	18082100	5225230	8170200	806380	8905300	8508800	2344100	4619800
Q07866;Q9H0B6	Kinesin light chain 1;Kinesin light chain 2	3	1	2	3	2	3	2	2	0	2	1	0	7300600	899610	2145230	5614300	6829800	3585300	1731100	0	4050800	4561500	0	3559200
P02545	Prelamin-A/C;Lamin-A/C	4	3	0	3	1	1	9	3	1	2	0	1	5214730	2048580	0	1379800	1783900	1646060	0	386020	1236610	20482480	673580	3052530
P61604	10 kDa heat shock protein, mitochondrial	2	2	7	3	0	7	7	4	6	2	5	7	4179900	466530	16218100	31606480	0	2185660	10535830	13713760	4869000	16638590	11126870	5069910
P22314	Ubiquitin-like modifier-activating enzyme 1	8	3	6	9	3	10	5	4	6	6	6	8	12805840	1519230	5437210	17940260	4924450	4739750	8995330	5409460	10504820	10192600	6974320	4360260
P08238	Heat shock protein HSP 90-beta	33	22	33	31	31	35	30	27	35	30	26	29	464008500	85494220	173607740	374017430	305459710	191911370	190285780	98900820	351037380	304368130	195850430	185263850
P25787	Proteasome subunit alpha type-2	6	7	3	6	7	10	6	6	6	7	8	5	17857100	10587920	3677380	31858260	42079200	10708590	23751170	4653270	21666300	20376500	9624660	14752600
Q12874	Splicing factor 3A subunit 3	8	8	6	8	8	5	4	7	5	8	7	5	30016740	16331430	9929960	12743400	37433500	11962130	20456100	5419900	20479400	15925700	8890420	23874390
CON__P02533;P02533;CON__Q6IFX2;CON__Q04695;Q04695	Keratin, type I cytoskeletal 14;Keratin, type I cytoskeletal 17	0	0	1	0	0	0	4	1	0	0	2	1	0	0	425300	0	0	0	5883320	1082200	0	529728000	0	633500
CON__Q7Z794;Q7Z794	Keratin, type II cytoskeletal 1b	1	0	0	0	0	0	4	1	0	0	1	0	686700	0	0	0	0	0	864220	0	0	11715400	0	828640
P82933	28S ribosomal protein S9, mitochondrial	4	4	1	2	3	4	1	3	0	2	2	0	10506100	3061810	2288700	3576090	4493900	1968450	2140840	0	4274000	1052200	0	5136400
Q13435	Splicing factor 3B subunit 2	28	27	15	16	26	11	18	26	19	17	22	10	116695440	55676700	30466290	35822560	142643280	18532420	90716680	13157250	61062000	49876850	34021540	102871750
P14625	Endoplasmin	34	23	27	29	24	27	30	28	27	30	25	25	276562700	46372220	72359430	155326080	160494260	93696630	94905090	52297420	177705800	163028800	69117880	111823370
P04264;CON__P04264	Keratin, type II cytoskeletal 1	47	35	49	7	24	10	44	34	9	14	64	52	539495080	158279580	526287580	18559740	134864710	7513740	1653160830	307303440	27781720	1131066130	10540060	176570540
O15372	Eukaryotic translation initiation factor 3 subunit H	18	13	10	13	24	18	14	13	14	17	17	8	112335070	35592770	30157630	85940710	164036520	31407100	60064570	12746060	76999000	57640000	35755230	75992700
O75122	CLIP-associating protein 2	17	19	13	16	13	17	13	14	12	15	16	10	60167110	37950790	29316490	47626280	53138500	22853450	40896640	9427280	33278490	31580750	21963180	36175800
P53621	Coatomer subunit alpha;Xenin;Proxenin	27	21	16	21	20	26	15	22	15	22	19	12	131150400	51537910	31236020	78607780	108089570	42055090	52979680	20166390	73203640	71561500	32892670	62052890
Q13464	Rho-associated protein kinase 1	62	50	52	57	54	65	51	56	56	53	58	47	382153940	114170190	185372720	315765130	319276130	138063840	203481190	106702720	237809130	226973340	197462680	221497640
P26640	Valine--tRNA ligase	25	21	12	25	28	22	26	25	16	25	22	10	117457400	45152090	12694490	46860380	145333030	52256790	75688250	8925220	88318620	96855510	27520000	96158680
Q14566	DNA replication licensing factor MCM6	10	4	4	6	7	9	7	4	3	9	8	3	29921830	4519060	5453460	18355800	21269600	9530220	12758700	3226470	20348910	15569400	4326590	6108800
P33991	DNA replication licensing factor MCM4	18	10	7	12	17	13	12	12	12	18	10	8	68103980	11549190	13232440	36485260	58186110	19808650	25821730	9155750	63311130	44707180	20576720	27955180
Q86YM7	Homer protein homolog 1	2	1	1	1	1	5	0	1	0	1	0	1	2178700	574560	1377100	327872650	211130000	104030000	0	775010	981800	0	0	915880
Q9BRS2	Serine/threonine-protein kinase RIO1	48	42	34	46	46	35	46	45	30	51	44	24	1120391950	352903380	215518600	293427300	841305800	398613200	616626480	87742590	781047980	637677730	181822360	603579820
P78371	T-complex protein 1 subunit beta	60	47	56	49	55	74	47	54	58	56	50	49	473094330	180534660	352203280	984472600	563895890	158832610	303076110	196058030	363251890	346073550	447284040	355565220
Q96AV8	Transcription factor E2F7	15	10	10	14	9	11	11	10	8	15	14	7	75386200	15027970	15960170	38419340	31906120	26184580	40493640	7355000	38139480	26429830	15231690	30716110
Q13561	Dynactin subunit 2	22	17	13	18	23	19	15	24	16	20	16	12	68500730	28195130	17025770	38110990	103073760	21693590	37763490	9841070	40606010	35010780	27403450	60621990
Q9UNH7	Sorting nexin-6;Sorting nexin-6, N-terminally processed	4	15	4	1	13	9	4	23	8	4	39	10	13647030	124034190	36175700	132385660	199312780	841140	906081950	42778440	4117270	7391400	68951590	431001540
Q9P1Y5	Calmodulin-regulated spectrin-associated protein 3	26	18	18	21	17	27	21	16	20	21	19	18	113221010	30640380	51022560	94003460	52693210	40215150	46726280	34285210	60923640	61760030	50496520	43509390
CON__P13647;P13647	Keratin, type II cytoskeletal 5	1	2	4	0	0	0	26	3	0	0	12	2	2719400	3457000	11368690	0	0	0	32241910	3503900	0	424874900	0	6542390
P34932	Heat shock 70 kDa protein 4	38	38	29	39	39	41	37	40	36	44	41	32	158134690	53251110	52646920	145836520	200396840	65281080	120770955	38161480	145542810	104488340	66143290	108293690
Q93009	Ubiquitin carboxyl-terminal hydrolase 7	8	3	5	3	4	7	8	6	6	6	4	4	27867300	2107610	4852720	12159100	7445400	3415920	5122480	2006300	11835100	12288030	5912390	8723680
P55072	Transitional endoplasmic reticulum ATPase	77	66	68	68	74	68	69	70	66	77	65	61	1013367070	261914210	340993780	582843830	887772400	326139550	459166600	192131390	719973800	638469700	446561200	559917560
P63244	Guanine nucleotide-binding protein subunit beta-2-like 1;Guanine nucleotide-binding protein subunit beta-2-like 1, N-terminally processed	5	2	0	3	5	6	4	3	2	3	4	2	6783140	1048250	0	7304440	10724000	1657890	4719050	2549910	2451260	5238040	1039810	2668890
O75150	E3 ubiquitin-protein ligase BRE1B	11	7	2	5	8	8	6	6	4	6	7	4	21045600	6085700	2565300	15031860	19338990	5449450	10103270	3237270	11031800	9428840	4608390	10059740
P49321	Nuclear autoantigenic sperm protein	12	9	10	12	11	13	8	9	14	13	10	9	44179910	16030220	25762770	76204000	56764500	22760170	28249240	15651490	39133900	24231700	40906420	22935400
P62195	26S protease regulatory subunit 8	15	17	17	19	19	23	17	20	16	20	20	11	77202200	35395140	44722030	81099010	109273200	33508370	65486400	19138450	63920790	49721510	41605740	65586190
P52732	Kinesin-like protein KIF11	143	157	73	125	156	79	126	154	71	124	151	57	3354810860	3164809900	284659100	390798680	5809458820	1194819680	4000084930	135199680	2057572870	2065910340	281651030	4406628700
Q8N5Z5	BTB/POZ domain-containing protein KCTD17	21	21	10	18	17	12	17	20	14	22	22	10	421552700	182270700	77743670	123651730	611770500	118146250	700112810	33198230	545007090	363000800	97844370	563242300
Q8NBS9	Thioredoxin domain-containing protein 5	2	1	0	2	2	3	5	4	2	4	3	0	6163000	732500	0	4598300	6968300	2586500	5841000	0	7272300	14303400	1758770	5321620
Q16186	Proteasomal ubiquitin receptor ADRM1	4	3	3	3	6	5	4	3	3	2	5	3	12239200	5018650	6520100	14505000	19377170	3384040	8198550	1786700	3108830	8281600	3434190	3262390
Q9UQ35	Serine/arginine repetitive matrix protein 2	14	11	10	11	15	12	12	12	10	11	13	9	31321830	10901800	11580300	20998210	35104650	9716590	17920370	4715940	16217030	15848930	10675750	23484660
P09211	Glutathione S-transferase P	10	14	7	8	15	9	9	13	6	9	14	6	59044100	65309340	17004510	43108000	268750200	17112870	184797100	8323370	41042200	59195100	16360100	118795930
P07195	L-lactate dehydrogenase B chain	2	2	4	4	3	6	5	3	6	5	5	5	9774000	1804880	15800900	42527100	16566400	5987780	21866600	12489430	20504500	17047000	18718340	7530250
P33992	DNA replication licensing factor MCM5	15	8	5	14	12	8	14	10	8	14	11	7	66762900	11532740	8449000	19142300	41055800	31607000	42378100	5059970	41116700	37479600	9136990	22234100
P62913	60S ribosomal protein L11	7	6	1	5	6	2	6	6	2	6	5	1	68229100	24336070	3491300	5204700	47689700	22818400	37011400	535080	31249200	26378840	3812400	38214370
O60232	Sjoegren syndrome/scleroderma autoantigen 1	7	5	4	3	5	6	3	5	5	5	5	3	25854900	12666790	8837600	16177700	45283000	7094760	18363400	6378900	15204220	12040100	11347160	21219100
P84090	Enhancer of rudimentary homolog	11	11	11	10	13	10	10	13	11	11	13	11	143448800	131916000	87072700	125031900	373341100	52824500	235905500	55604100	95384300	104740200	95738100	233605280
O75688;P35813	Protein phosphatase 1B;Protein phosphatase 1A	9	7	7	8	9	8	8	8	8	8	8	8	1609912300	578528000	514625600	1196320600	1321460200	648485400	1176327700	545323730	1119487400	933623400	657015900	619351600
P67936;P09493;P06753;CON__Q3SX28;P07951	Tropomyosin alpha-4 chain;Tropomyosin alpha-1 chain;Tropomyosin alpha-3 chain;Tropomyosin beta chain	5	5	4	5	4	5	5	4	4	5	5	5	38208900	8719810	22334000	35718500	24276100	17723970	20265300	15728340	35382700	51992200	13488400	19368000
Q9Y4E8	Ubiquitin carboxyl-terminal hydrolase 15	26	19	30	24	21	32	24	21	28	24	22	22	124486100	32852730	99695920	161332100	102249880	43254370	70124470	39279220	92184550	81127550	98331840	68043070
Q15208;Q9Y2H1	Serine/threonine-protein kinase 38;Serine/threonine-protein kinase 38-like	8	8	6	8	8	6	8	8	7	8	8	8	394896200	103648860	100326200	239469000	307186600	135381800	202943660	73924890	338541400	203908700	134162100	145539400
P82650	28S ribosomal protein S22, mitochondrial	6	5	3	4	6	4	4	5	4	4	4	4	18720000	6482480	3516300	6281600	19092500	4522210	8003200	3517770	7994600	6632000	4517450	11496700
P00558	Phosphoglycerate kinase 1	1	0	2	0	0	4	1	0	4	0	1	3	681680	0	2083670	7538700	0	0	1305600	1884970	0	1843800	3371260	0
P67775;P62714	Serine/threonine-protein phosphatase 2A catalytic subunit alpha isoform;Serine/threonine-protein phosphatase 2A catalytic subunit beta isoform	2	2	1	1	4	1	2	4	1	4	2	1	5901910	4402970	2216300	5663200	15509700	2442400	4608200	1205200	13432700	8773600	3664800	11524420
P17980	26S protease regulatory subunit 6A	12	14	13	12	15	12	12	15	11	9	11	12	50330150	27357200	28059380	43492250	88655500	22602590	46956560	14911570	33982700	48226820	28959700	49901490
A6NHR9	Structural maintenance of chromosomes flexible hinge domain-containing protein 1	8	7	0	6	6	1	5	6	1	6	3	0	16203800	8611360	0	1037100	10757600	5943150	3342770	0	8205920	4570830	583660	17287900
Q9NP73	Putative bifunctional UDP-N-acetylglucosamine transferase and deubiquitinase ALG13	8	10	6	10	5	5	8	5	5	7	5	4	13946740	9363770	6998190	9045350	7585990	11109980	5922060	2445270	11170410	10305970	8130420	6746010
CON__P08779;P08779	Keratin, type I cytoskeletal 16	0	0	0	0	0	0	21	0	0	0	1	0	0	0	0	0	0	0	637440	0	0	214763600	0	0
P05109	Protein S100-A8;Protein S100-A8, N-terminally processed	0	0	1	0	0	0	19	0	0	0	0	0	0	0	3099700	0	0	0	0	0	0	1308758300	0	0
Q9NZT1	Calmodulin-like protein 5	0	0	1	1	0	0	18	0	0	0	2	0	0	0	802620	0	0	850900	3925500	0	0	261326300	0	0
CON__Q5XKE5;Q5XKE5	Keratin, type II cytoskeletal 79	0	0	0	0	0	0	12	0	0	0	0	0	0	0	0	0	0	0	0	0	0	56331900	0	0
P31151	Protein S100-A7	0	0	1	0	0	0	12	0	0	0	0	1	0	0	875910	0	0	0	0	365270	0	301335200	0	0
O75223	Gamma-glutamylcyclotransferase	2	0	0	0	0	0	12	0	0	1	0	0	3047800	0	0	0	0	0	0	0	862560	79080540	0	0
P31151;Q86SG5	Protein S100-A7;Protein S100-A7A	0	0	0	0	0	0	10	0	0	0	0	0	0	0	0	0	0	0	0	0	0	228844600	0	0
CON__P02533;P02533	Keratin, type I cytoskeletal 14	0	0	3	0	0	0	9	0	0	0	4	1	0	0	2161680	0	0	0	6958950	864470	0	54339000	0	0
P27482	Calmodulin-like protein 3	0	0	0	1	0	0	6	0	0	0	0	0	0	0	0	0	0	701580	0	0	0	29543400	0	0
O00264	Membrane-associated progesterone receptor component 1	4	3	0	5	5	5	3	5	5	5	4	4	9708000	2538140	0	16620680	17384200	9975300	8851900	3415050	16340160	7029700	10718600	10488900
P14923	Junction plakoglobin	0	0	0	0	0	0	5	0	0	0	0	0	0	0	0	0	0	0	0	0	0	11902200	0	0
P31944	Caspase-14;Caspase-14 subunit p17, mature form;Caspase-14 subunit p10, mature form;Caspase-14 subunit p20, intermediate form;Caspase-14 subunit p8, intermediate form	0	0	0	0	0	0	5	0	0	0	0	0	0	0	0	0	0	0	0	0	0	38521800	0	0
P53634	Dipeptidyl peptidase 1;Dipeptidyl peptidase 1 exclusion domain chain;Dipeptidyl peptidase 1 heavy chain;Dipeptidyl peptidase 1 light chain	0	0	0	0	0	0	5	0	0	0	0	0	0	0	0	0	0	0	0	0	0	18889700	0	0
CON__P02538;P02538	Keratin, type II cytoskeletal 6A	1	0	0	0	0	0	5	0	0	0	0	0	1090500	0	0	0	0	0	0	0	0	154280100	0	0
P54577	Tyrosine--tRNA ligase, cytoplasmic;Tyrosine--tRNA ligase, cytoplasmic, N-terminally processed	0	1	2	3	0	3	3	1	3	2	3	3	0	676530	2935130	8565400	0	2259090	3852090	3126900	2992600	6855300	5564890	1113300
Q06124	Tyrosine-protein phosphatase non-receptor type 11	0	0	3	1	2	3	1	3	3	1	3	2	0	0	3686800	5198500	2312390	479510	2778010	1176490	1184000	1202600	3146530	2323970
O14773	Tripeptidyl-peptidase 1	0	0	0	2	1	2	2	1	1	2	1	0	0	0	0	2153730	2097900	1157420	558050	0	1607690	10169400	648480	804230
Q02413	Desmoglein-1	0	0	0	1	0	0	4	0	0	1	2	0	0	0	0	0	0	1491000	2714300	0	1143500	14521100	0	0
P22626	Heterogeneous nuclear ribonucleoproteins A2/B1	7	4	4	7	7	7	7	7	5	6	7	4	26727200	4095330	6161580	15481700	20139300	8122750	24270300	2411060	13184360	20338000	5588980	16335600
CON__P02533;P02533;CON__Q04695;Q04695	Keratin, type I cytoskeletal 14;Keratin, type I cytoskeletal 17	0	0	0	0	0	0	3	0	0	0	0	0	0	0	0	0	0	0	0	0	0	14051500	0	0
CON__Q9C075;Q9C075	Keratin, type I cytoskeletal 23	0	0	0	0	0	0	3	0	0	0	0	0	0	0	0	0	0	0	0	0	0	7834800	0	0
P01857;P01860;P01861	Ig gamma-1 chain C region;Ig gamma-3 chain C region;Ig gamma-4 chain C region	0	0	0	1	0	0	3	0	0	0	1	0	0	0	0	0	0	160720	189230	0	0	14147800	0	0
P05141;P12236;P12235	ADP/ATP translocase 2;ADP/ATP translocase 2, N-terminally processed;ADP/ATP translocase 3;ADP/ATP translocase 3, N-terminally processed;ADP/ATP translocase 1	3	2	1	2	3	3	3	3	3	3	3	1	14419300	3614700	2688300	14320800	19300000	6777600	8193000	806550	13964100	11856200	5813100	12719200
P22735	Protein-glutamine gamma-glutamyltransferase K	0	0	0	0	0	0	3	0	0	0	0	0	0	0	0	0	0	0	0	0	0	10055100	0	0
P23528;Q9Y281	Cofilin-1;Cofilin-2	3	3	3	3	4	4	4	4	4	3	3	3	21501400	14039600	19197600	35996170	54769200	9159300	31342600	11579600	17133470	25200770	22393610	32230900
P29508	Serpin B3	0	0	0	0	0	0	3	0	0	0	0	0	0	0	0	0	0	0	0	0	0	16413200	0	0
P32320	Cytidine deaminase	0	0	0	0	0	0	3	0	0	0	0	0	0	0	0	0	0	0	0	0	0	11639400	0	0
Q8WVV4	Protein POF1B	0	0	0	0	0	0	3	0	0	0	0	0	0	0	0	0	0	0	0	0	0	3144430	0	0
Q9NVA2;Q14141	Septin-11;Septin-6	0	0	0	1	1	0	1	1	1	0	1	0	0	0	0	0	5678100	778190	2215400	0	0	3009200	1846000	2000800
Q9UQE7	Structural maintenance of chromosomes protein 3	23	16	12	14	20	14	20	20	14	20	20	9	79528350	18965320	16490890	33189760	81577610	20189870	40492180	7088270	53143970	39884920	17033380	45356600
P51665	26S proteasome non-ATPase regulatory subunit 7	11	4	1	7	9	8	7	9	2	5	8	2	33279600	5688840	985800	14375130	28703300	7673960	12348800	1278170	10277380	17273700	3453900	18333590
P04259	Keratin, type II cytoskeletal 6B	1	0	0	0	0	0	3	0	0	0	0	0	4063700	0	0	0	0	0	0	0	0	48068000	0	0
P04259;CON__P48668;P48668;CON__P13647;P13647;CON__P04259	Keratin, type II cytoskeletal 6B;Keratin, type II cytoskeletal 6C;Keratin, type II cytoskeletal 5	0	0	1	0	0	0	3	0	0	0	0	0	0	0	1011800	0	0	0	0	0	0	38613200	0	0
P18669;P15259;Q8N0Y7	Phosphoglycerate mutase 1;Phosphoglycerate mutase 2;Probable phosphoglycerate mutase 4	1	0	0	1	0	1	1	1	1	1	1	1	1104400	0	0	2240700	0	301900	1243800	813730	1247100	4296700	1084400	696950
P22392;P15531	Nucleoside diphosphate kinase B;Nucleoside diphosphate kinase A	1	1	1	1	2	1	2	2	1	1	1	1	3035700	530560	2270800	5548800	6226300	1766900	2284900	295000	2226200	1825720	1803200	2615300
P54136	Arginine--tRNA ligase, cytoplasmic	1	2	0	1	2	0	1	2	2	1	2	0	1225100	1419560	0	0	4715900	836290	2550460	0	1119200	2160100	1642480	3203900
Q14574	Desmocollin-3	1	0	0	1	0	1	1	1	1	1	0	0	2762400	0	0	1246300	0	909560	0	0	1051900	1541100	732620	1108000
Q16878	Cysteine dioxygenase type 1	1	1	1	0	2	1	2	2	1	1	1	1	22539000	8502600	14473000	28695000	33243600	0	13338000	14915000	16842000	15416800	16937000	19962100
Q9H9J4	Ubiquitin carboxyl-terminal hydrolase 42	1	0	0	0	1	1	1	1	1	0	0	1	1694500	0	0	1526800	2368400	0	0	182860	0	2421000	898560	3249300
Q9UNH7;Q86XE0	Sorting nexin-6;Sorting nexin-6, N-terminally processed;Sorting nexin-32	0	0	1	0	0	0	0	3	0	0	6	0	0	0	2404500	0	0	0	114838400	0	0	0	0	8434730
P15170;Q8IYD1	Eukaryotic peptide chain release factor GTP-binding subunit ERF3A;Eukaryotic peptide chain release factor GTP-binding subunit ERF3B	0	0	0	1	1	1	0	1	1	0	0	0	0	0	0	4613900	2346100	1650800	0	0	0	0	2817400	1873500
P56385	ATP synthase subunit e, mitochondrial	0	1	1	2	1	2	1	1	2	2	1	0	0	583570	773000	2117460	3125200	1429950	1052400	0	2088680	708850	1416470	1633600
P63241;Q9GZV4;Q6IS14	Eukaryotic translation initiation factor 5A-1;Eukaryotic translation initiation factor 5A-2;Eukaryotic translation initiation factor 5A-1-like	2	0	0	1	2	3	1	2	1	1	2	1	3610100	0	0	3996540	4837400	1017800	3758700	390710	1483000	1892500	620570	4685500
Q9Y3R4	Sialidase-2	0	1	1	0	1	1	2	1	1	1	1	1	0	762900	1021100	2256900	3377500	0	2376700	736560	3000700	4975900	1200000	1909200
O75150;Q5VTR2	E3 ubiquitin-protein ligase BRE1B;E3 ubiquitin-protein ligase BRE1A	3	1	2	2	2	2	3	2	2	3	3	2	5899270	1344900	1614030	3156500	3807550	2507100	3356120	1620550	4655650	3392920	1862650	2204460
P17066;P48741	Heat shock 70 kDa protein 6;Putative heat shock 70 kDa protein 7	2	2	2	2	2	2	3	2	2	2	2	2	38844200	5277200	15214000	22447000	29277000	19809600	15085300	6329900	24942300	18116160	15594500	17149500
P24666	Low molecular weight phosphotyrosine protein phosphatase	2	1	1	1	2	1	2	2	1	2	2	0	5197300	802710	567470	1045400	3652300	868150	3034460	0	4286900	4922800	691070	3152800
P55735	Protein SEC13 homolog	2	2	2	2	2	2	3	2	2	2	2	2	10236600	4197500	9000400	11843100	10576400	4986500	6524500	3810600	7495000	7350400	8789000	6744200
P56270;Q14119	Myc-associated zinc finger protein;Vascular endothelial zinc finger 1	2	2	0	2	2	0	2	3	0	2	2	0	5261200	2097270	0	0	5261100	2376100	2305200	0	3206400	2293930	0	4670910
Q12905	Interleukin enhancer-binding factor 2	2	2	0	1	2	1	2	2	1	2	2	0	5895900	2038240	0	1177800	4677600	721330	3079200	0	2468640	5911100	1236800	6811000
Q15417	Calponin-3	2	0	2	2	0	2	2	1	2	2	2	2	5355100	0	2867590	5172900	0	1503500	2460440	1585130	2624630	2540890	2819370	622140
Q92522	Histone H1x	3	3	2	3	2	3	3	3	3	3	3	2	4756700	3385360	1400500	3402980	7536900	2405140	4503060	827100	2279660	3266740	1493730	5860600
Q9BQE3;Q71U36;Q13748;Q6PEY2	Tubulin alpha-1C chain;Tubulin alpha-1A chain;Tubulin alpha-3C/D chain;Tubulin alpha-3E chain	2	2	2	2	2	2	2	3	2	2	2	3	13181100	3099700	4018400	19042500	25199000	4950180	21567000	3562520	18561900	10747700	7227500	15089900
O14646	Chromodomain-helicase-DNA-binding protein 1	1	0	1	0	1	1	1	1	1	1	1	0	1557100	0	511640	690050	3138400	0	1107600	0	1828200	1241100	1154000	1620900
P04350;P68371;A6NNZ2;P07437;Q13885;Q9BVA1;Q3ZCM7	Tubulin beta-4A chain;Tubulin beta-4B chain;Tubulin beta-8 chain-like protein LOC260334;Tubulin beta chain;Tubulin beta-2A chain;Tubulin beta-2B chain;Tubulin beta-8 chain	1	1	0	0	1	1	1	1	1	1	1	1	1160700	749160	0	1438000	6045300	0	1886100	118140	2056600	1283100	945450	1859000
P05198	Eukaryotic translation initiation factor 2 subunit 1	1	0	1	0	1	1	1	1	1	1	1	0	3464600	0	2034900	3403800	2043600	0	2061600	0	2131400	3411800	1640900	3038300
P31930	Cytochrome b-c1 complex subunit 1, mitochondrial	1	1	0	1	1	0	1	1	1	1	1	0	2857400	1688700	0	0	2139300	1112200	987040	0	1709900	1589700	778010	2801000
P35908;CON__P35908;P04259;CON__P02538;P02538;CON__O95678;O95678;CON__P07744;CON__Q8VED5;CON__P48668;P48668;CON__P13647;P13647;CON__Q5XKE5;Q5XKE5;CON__P04259;CON__P05787;P05787	Keratin, type II cytoskeletal 2 epidermal;Keratin, type II cytoskeletal 6B;Keratin, type II cytoskeletal 6A;Keratin, type II cytoskeletal 75;Keratin, type II cytoskeletal 6C;Keratin, type II cytoskeletal 5;Keratin, type II cytoskeletal 79;Keratin, type II cytoskeletal 8	0	0	2	0	1	0	2	1	0	0	2	2	0	0	4240400	0	710810	0	5584200	1672800	0	20690800	0	649630
P41567	Eukaryotic translation initiation factor 1	0	1	1	0	1	1	0	1	2	0	1	0	0	748870	3319100	2711200	1696800	0	1310300	0	0	0	3532900	2649600
P42566	Epidermal growth factor receptor substrate 15	1	0	1	0	1	1	1	1	1	0	1	0	2397200	0	915650	1548300	1812400	0	1394500	0	0	1557300	1400700	821580
Q14103;O14979	Heterogeneous nuclear ribonucleoprotein D0;Heterogeneous nuclear ribonucleoprotein D-like	1	1	0	1	1	0	1	1	1	1	1	1	4813800	521110	0	0	1783900	757910	1783300	277110	2471500	2173400	759220	1503200
Q56P03	E2F-associated phosphoprotein	1	0	1	1	0	1	1	1	1	1	1	1	2583200	0	798860	1001000	0	1049900	1309200	460110	1816600	1184900	922420	1619000
Q9BVK6	Transmembrane emp24 domain-containing protein 9	1	1	0	1	0	1	1	1	1	1	1	1	1160000	523270	0	1269300	0	933100	785710	450260	1198600	1024500	909640	1023200
Q9Y657;Q9BPZ2;Q99865;Q5JUX0	Spindlin-1;Spindlin-2B;Spindlin-2A;Spindlin-3	1	0	1	0	1	1	1	1	1	1	1	1	3623000	0	1533100	4758800	2768800	0	2473800	527660	1723400	2617200	1313100	2449400
P01617;P01614;P06309;P06310	Ig kappa chain V-II region TEW;Ig kappa chain V-II region Cum;Ig kappa chain V-II region GM607;Ig kappa chain V-II region RPMI 6410	0	0	1	1	1	1	1	0	1	0	1	1	0	0	4397700	2583000	125260000	1235700	2811300	512800	0	646320	1251600	0
P10644	cAMP-dependent protein kinase type I-alpha regulatory subunit;cAMP-dependent protein kinase type I-alpha regulatory subunit, N-terminally processed	1	0	0	1	1	1	1	1	0	0	1	0	1012200	0	0	930830	3664500	483730	1186200	0	0	1256500	0	906460
Q15170	Transcription elongation factor A protein-like 1	1	0	0	1	1	1	1	0	1	2	2	1	224070	0	0	1078800	255080	376430	2264700	995540	3529610	543250	1167600	0
Q6UB35;P11586	Monofunctional C1-tetrahydrofolate synthase, mitochondrial;C-1-tetrahydrofolate synthase, cytoplasmic;Methylenetetrahydrofolate dehydrogenase;Methenyltetrahydrofolate cyclohydrolase;Formyltetrahydrofolate synthetase;C-1-tetrahydrofolate synthase, cytoplasmic, N-terminally processed	1	0	0	1	1	1	1	1	0	1	0	1	4207700	0	0	8314000	2835300	2066000	0	1001700	2555200	2756700	0	631020
Q92945;Q96AE4;Q96I24	Far upstream element-binding protein 2;Far upstream element-binding protein 1;Far upstream element-binding protein 3	0	0	1	1	1	1	1	1	0	1	1	1	0	0	1817800	6155600	3321200	2021000	2798700	1852500	3375300	3105100	0	2082000
Q9UL15	BAG family molecular chaperone regulator 5	1	0	0	1	1	1	1	1	0	0	1	0	1582200	0	0	1746900	42851000	949620	946990	0	0	1036800	0	1286400
Q9P270;Q8ND83	SLAIN motif-containing protein 2;SLAIN motif-containing protein 1	1	1	1	2	2	1	1	2	1	2	1	1	1570100	393350	864360	705810	5557800	4180710	3717400	559490	2072360	1308700	759150	4511800
O14617	AP-3 complex subunit delta-1	4	3	3	4	4	4	4	3	4	5	3	0	13509200	3663420	2103820	8102040	7884500	4385690	4049900	0	7526660	7120500	4963150	4871900
P35580;P35579	Myosin-10;Myosin-9	3	1	3	2	3	4	2	3	3	2	4	2	9704300	2407900	5088880	5208770	8862700	3121100	7736470	1607690	5655700	6250700	4736460	7846600
P52907	F-actin-capping protein subunit alpha-1	5	5	4	3	5	5	5	5	5	5	5	5	20420500	9480850	8861400	19069500	29149600	6781000	17835500	6503710	19180600	17797700	15946500	20100000
CON__P00761;Q9BYE2;CON__P07477;P07477	Transmembrane protease serine 13;Trypsin-1;Alpha-trypsin chain 1;Alpha-trypsin chain 2	1	1	1	0	1	1	1	1	1	1	1	1	5438400	6496300	8758300	6959100	10307000	0	7633400	6420700	8172000	5963400	6851100	7037700
O14737	Programmed cell death protein 5	3	1	4	2	2	5	2	2	4	2	4	4	4102600	168040	10614600	20760800	1757920	973490	4650370	5745290	3241400	1734630	12398600	2013470
O14929	Histone acetyltransferase type B catalytic subunit	1	1	0	1	1	1	1	1	0	1	0	0	3023200	787680	0	1859200	1694900	1055400	0	0	1430400	1608000	0	863540
P07900;Q58FG0	Heat shock protein HSP 90-alpha;Putative heat shock protein HSP 90-alpha A5	2	1	1	2	1	2	2	1	1	1	2	1	12524160	1191500	2262200	8684700	6357100	4718250	5214630	3057800	5187100	8477060	4502500	2715100
P17812;Q9NRF8	CTP synthase 1;CTP synthase 2	1	1	0	1	1	1	1	0	1	1	1	0	3216100	732790	0	438440	2432400	1251200	1880400	0	1903100	1562600	794050	0
P25490	Transcriptional repressor protein YY1	1	1	0	1	1	1	1	1	0	1	1	0	3684300	997740	0	508120	2058100	592850	823690	0	1515900	911080	0	1136600
P30837	Aldehyde dehydrogenase X, mitochondrial	3	1	0	2	2	1	2	1	1	2	1	2	4640160	461340	0	411130	1942910	1070040	273160	391150	2790300	2919940	1003900	961380
P42025	Beta-centractin	3	3	1	2	2	2	2	3	2	3	2	1	7195300	3023810	607690	3259300	10184300	2342000	6959600	947670	5826240	4210900	2788900	6148500
P50502;Q8NFI4	Hsc70-interacting protein;Putative protein FAM10A5	1	0	1	1	1	1	1	1	0	2	0	0	1872400	0	4034200	3803100	3368200	1987500	0	0	9250200	6550700	0	4464800
P50750	Cyclin-dependent kinase 9	4	2	1	2	1	1	2	4	1	3	3	2	12416000	2362740	1610000	1969700	4002200	3809700	5036730	1013870	5674270	4592600	1382200	6996110
P58107	Epiplakin	2	1	0	1	1	0	2	1	0	0	2	0	2744210	352440	0	0	1214700	965410	1684930	0	0	3375100	0	1456400
P60510	Serine/threonine-protein phosphatase 4 catalytic subunit	2	2	0	2	1	2	2	1	1	1	2	2	13618700	3837770	0	7604070	8920300	5736830	6603880	2799840	1594100	11831700	4463900	5152800
P61981;P31946	14-3-3 protein gamma;14-3-3 protein gamma, N-terminally processed;14-3-3 protein beta/alpha;14-3-3 protein beta/alpha, N-terminally processed	3	2	2	2	2	2	3	2	2	2	2	2	15973500	8295300	11581300	13119800	13587000	6071980	11704900	5955300	15032200	14201800	7401900	12567060
P62158;P02585;P27482	Calmodulin;Troponin C, skeletal muscle;Calmodulin-like protein 3	1	1	0	1	1	1	1	1	0	1	1	0	6913100	4185900	0	8371300	4897000	3308200	4313500	0	4574100	16957000	0	4569100
P62273	40S ribosomal protein S29	1	1	0	1	1	1	1	1	0	0	1	0	8025200	2898200	0	3675400	9524200	3144100	3455300	0	0	4350700	0	5899400
P62304	Small nuclear ribonucleoprotein E	4	5	2	4	5	3	4	4	3	4	3	2	56891400	20524220	10709900	16525860	66269900	23922920	29643300	6571720	41403000	36099600	13012100	43105900
P62701;Q8TD47	40S ribosomal protein S4, X isoform;40S ribosomal protein S4, Y isoform 2	1	1	0	1	1	1	1	1	0	1	0	0	3184900	2818200	0	2035100	3464200	2942300	0	0	1806800	2693200	0	2324200
P63208	S-phase kinase-associated protein 1	1	1	0	1	1	1	1	0	1	0	1	0	3785600	927250	0	1700200	4705300	565660	2592900	0	0	2490000	1569100	0
Q13330	Metastasis-associated protein MTA1	4	4	1	3	3	2	3	4	2	4	2	1	6858300	3782400	288370	2475600	5101870	1414970	1684960	220010	3661740	2111110	1758180	4563550
Q13557	Calcium/calmodulin-dependent protein kinase type II subunit delta	2	2	2	1	2	1	3	2	1	1	0	0	3525100	1075030	1521650	1373100	5963000	512910	0	0	487020	5334450	1220300	2215200
Q16586	Alpha-sarcoglycan	1	1	1	1	1	0	1	1	1	1	0	1	3513300	587180	1067300	0	1604400	1130400	0	394650	2514700	1304600	1014800	1231100
Q53H96	Pyrroline-5-carboxylate reductase 3	1	2	1	2	2	1	2	1	1	2	2	1	2276600	2049120	719030	1221200	5392100	2310670	3402200	662430	3428600	2837600	517840	2118700
Q6ZU80	Centrosomal protein of 128 kDa	1	1	1	1	0	1	1	1	1	1	1	1	18427000	5605500	4298100	4914900	0	2747400	8400500	2916000	10657000	7467600	3337800	8662900
Q71UM5	40S ribosomal protein S27-like	1	0	1	1	1	1	0	1	1	0	1	0	5078300	0	1140300	2348500	4348200	1463600	1631100	0	0	0	859960	1411400
Q7L2H7	Eukaryotic translation initiation factor 3 subunit M	13	8	7	6	10	9	8	12	8	7	11	7	36805200	12039050	7983550	17025240	35684300	7772590	21512790	8819370	22921700	18822400	17781300	29584500
Q8N8S7;Q9UI08	Protein enabled homolog;Ena/VASP-like protein	0	1	1	1	1	1	1	1	0	1	1	0	0	1788900	2111900	3873100	6068000	1993100	2754700	0	3342100	3432600	0	4840500
Q92665	28S ribosomal protein S31, mitochondrial	3	3	3	2	3	3	2	3	4	2	3	1	7528400	2134940	3006950	3030920	6973800	1586770	3882420	852420	3581780	3682400	2470870	4412230
Q92841;P17844	Probable ATP-dependent RNA helicase DDX17;Probable ATP-dependent RNA helicase DDX5	1	1	0	1	1	1	1	1	0	0	1	0	3003000	508020	0	1371400	1514300	1240900	880610	0	0	1584400	0	1136300
Q9H2U2	Inorganic pyrophosphatase 2, mitochondrial	1	1	1	1	0	1	1	1	1	0	1	1	3333700	1011800	2384700	4201800	0	1844400	1827100	1585300	0	2661500	2635400	2326000
Q9H814	Phosphorylated adapter RNA export protein	1	1	1	0	1	1	1	1	1	1	1	1	3835300	955290	1023700	1462700	3023000	0	1383600	684870	1507000	3232300	1124300	2240300
Q9NYL9;Q9NZR1	Tropomodulin-3;Tropomodulin-2	1	0	1	1	1	1	1	1	0	1	1	1	1046500	0	227230	575130	788570	309100	299960	227680	556980	267550	0	389280
Q9NZ01	Very-long-chain enoyl-CoA reductase	2	1	1	2	2	1	2	1	1	1	2	1	5513000	911190	702780	2456100	6241300	3430100	3515700	512330	2545300	3433600	849820	1803300
Q9Y3B4	Splicing factor 3B subunit 6	1	1	0	1	1	1	0	1	1	0	1	1	2747600	1004600	0	1319900	1991800	522940	1794700	338890	0	0	588730	4426900
O14818;Q8TAA3	Proteasome subunit alpha type-7;Proteasome subunit alpha type-7-like	6	5	5	6	7	5	6	4	5	6	6	3	23168300	9860400	8546280	15177700	44624900	9203550	18175860	4820590	20486700	19932500	10004830	18048900
P83731	60S ribosomal protein L24	8	9	7	9	9	7	7	9	7	9	8	7	30424160	20756290	10119690	17906900	46464100	15194750	22059930	6383610	23908380	16291770	14071940	33152200
P54252	Ataxin-3	1	1	2	0	1	1	1	1	1	1	1	0	989690	2548600	1194070	1105800	7089100	0	4715700	0	3143100	1022400	759740	5832900
Q15293	Reticulocalbin-1	3	0	1	1	0	1	1	1	1	2	0	0	5617840	0	1171800	3095900	0	1046800	0	0	2850000	1963200	861680	1204600
P49589	Cysteine--tRNA ligase, cytoplasmic	2	0	0	1	2	0	1	0	0	1	0	0	3164200	0	0	0	3927300	891760	0	0	1071100	1077100	0	0
O60220	Mitochondrial import inner membrane translocase subunit Tim8 A	2	0	1	1	0	2	1	0	1	0	0	2	4650660	0	1974500	4063910	0	206050	0	1721950	0	2073700	1883800	0
P50454	Serpin H1	3	0	0	2	0	3	0	1	1	1	2	1	4696670	0	0	6232530	0	1866480	3635600	701530	2899800	0	671040	1719900
P63241;Q9GZV4	Eukaryotic translation initiation factor 5A-1;Eukaryotic translation initiation factor 5A-2	1	1	1	1	1	1	1	1	0	1	1	0	7588000	2422500	2022600	8032800	10283000	3378200	9419700	0	5377900	4323900	0	6028500
P80297;P02795;P13640;P80294;P04731	Metallothionein-1X;Metallothionein-2;Metallothionein-1G;Metallothionein-1H;Metallothionein-1A	1	1	1	1	1	1	1	1	0	1	1	0	1673000	731650	1382200	3462200	1354800	497030	933080	0	892250	1125700	0	912240
Q92598;P34932	Heat shock protein 105 kDa;Heat shock 70 kDa protein 4	1	1	1	1	1	1	1	0	1	1	0	1	11014000	2119600	2915000	7599800	8387700	3374000	0	2650000	5082300	5097800	2812700	0
Q9Y5U2	Protein TSSC4	1	1	1	1	1	1	1	0	1	1	0	1	2887000	2080400	1289600	3373100	3626400	1917800	0	1162100	3178700	3922400	1964000	0
P07437;Q13885;Q9BVA1	Tubulin beta chain;Tubulin beta-2A chain;Tubulin beta-2B chain	2	3	2	2	2	3	2	2	2	2	2	2	125629000	51984120	57503300	89372000	153388000	69312600	105809400	34591700	117121700	92660500	54927900	93670800
P09012	U1 small nuclear ribonucleoprotein A	1	2	2	3	1	1	2	1	1	1	2	1	2505100	5162500	3023120	1676800	3647300	3409680	3320190	913810	1355900	2874300	1021300	2044300
P09132	Signal recognition particle 19 kDa protein	3	1	1	1	2	3	1	2	1	2	2	0	4686630	930500	440930	4743890	5290960	1480400	3478360	0	3263680	2948900	338970	2932950
P0DMV9;P0DMV8;P17066	Heat shock 70 kDa protein 1B;Heat shock 70 kDa protein 1A;Heat shock 70 kDa protein 6	3	3	3	3	3	3	2	3	3	3	3	3	61278300	15361100	16300100	45725400	93700800	28133600	64439500	15697600	74478400	52118000	32993600	68123500
P18621	60S ribosomal protein L17	5	5	2	4	4	4	3	4	4	4	2	1	19259200	14603200	2332190	10311400	27144400	8265770	5897700	931210	11733700	12584600	6356990	22183300
Q99436	Proteasome subunit beta type-7	3	4	2	2	3	4	2	2	4	4	3	1	11771000	15530430	5398800	22100500	18180500	4810450	13185000	5198000	17770100	9214600	22320030	10140900
P19338	Nucleolin	18	15	13	14	16	12	14	19	12	16	14	11	98878100	37854450	26221540	42195500	97709400	23564320	51795190	14406550	66298660	62865500	23802810	125304840
P68371;P07437;Q13885;Q9BVA1	Tubulin beta-4B chain;Tubulin beta chain;Tubulin beta-2A chain;Tubulin beta-2B chain	8	8	6	8	8	7	6	9	5	7	9	5	265202000	59646180	52271920	178164300	281549600	72221100	172234900	38602300	137979300	177632200	50173000	141929400
P04264	Keratin, type II cytoskeletal 1	1	2	6	0	1	0	6	1	0	0	3	2	30929000	14512260	87856850	0	9263200	0	192873200	38798000	0	593519500	0	23404000
P08670;P41219	Vimentin;Peripherin	3	2	3	2	2	3	2	2	2	2	3	2	7324480	2507100	4925450	7985300	5275500	1764830	3466330	1975940	2994600	3081400	3437600	3350500
P62899	60S ribosomal protein L31	4	4	3	4	3	3	3	3	3	3	4	3	14734600	11391000	4760270	7837300	25512000	7149140	12484500	2684220	9874500	8311680	4656200	14936800
Q15018	BRISC complex subunit Abro1	2	1	1	1	1	1	1	1	0	1	0	0	4367200	883060	843950	1016700	1340500	937520	0	0	1553500	1309300	0	1036900
O14776	Transcription elongation regulator 1	3	0	0	1	0	2	1	0	0	1	1	1	6581450	0	0	2152000	0	730470	878390	463230	2342100	956550	0	0
O60783	28S ribosomal protein S14, mitochondrial	2	2	2	2	2	2	0	2	2	1	2	2	6129300	5237840	3146190	4538550	5291000	4626190	3231050	1810220	3197200	0	3569310	6873700
P04264;CON__P04264;CON__Q7Z794;Q7Z794;P35908;CON__P35908;CON__Q9R0H5;CON__Q6NXH9	Keratin, type II cytoskeletal 1;Keratin, type II cytoskeletal 1b;Keratin, type II cytoskeletal 2 epidermal	1	2	2	1	1	0	1	1	1	1	2	2	21237000	15074050	18487300	0	2507500	455190	98021200	9588360	1150200	8633200	1024100	10056000
Q13136	Liprin-alpha-1	3	0	0	2	1	0	0	1	0	1	0	1	4752800	0	0	0	1214400	918290	0	251510	599660	0	0	732870
Q6PD62	RNA polymerase-associated protein CTR9 homolog	3	0	0	0	2	1	0	0	1	2	2	0	4666800	0	0	883460	2770220	0	1607480	0	3795300	0	463080	0
P67809	Nuclease-sensitive element-binding protein 1	3	5	2	3	4	3	3	4	1	3	3	1	14434600	17829460	3858900	7728700	21390000	3816140	10205630	2252100	11203680	9131000	1788200	14066700
Q14839	Chromodomain-helicase-DNA-binding protein 4	10	8	2	6	10	9	8	7	3	7	9	6	43152000	16428740	2561510	18125500	30737700	13311050	22557200	5589230	19271500	16856400	4768600	18160200
Q16181	Septin-7	17	13	10	11	16	14	12	14	12	14	12	10	88561700	33515100	33306800	58844500	87171100	27137870	44911200	15317860	65244700	41829840	32168430	49280510
Q13123	Protein Red	3	2	0	1	1	1	0	1	1	2	3	0	8599000	764980	0	1501900	797050	660830	2713020	0	2726500	0	373710	1494400
Q4V328	GRIP1-associated protein 1	4	2	0	0	1	0	0	1	2	0	0	0	7038600	1290260	0	0	1072700	0	0	0	0	0	5311790	589730
Q92922	SWI/SNF complex subunit SMARCC1	1	3	1	1	1	1	1	0	1	1	0	0	1522100	1490730	712440	2374000	1152900	295370	0	0	1267000	554220	416310	0
Q9BUQ8	Probable ATP-dependent RNA helicase DDX23	4	4	4	3	4	3	2	4	3	3	3	2	8929450	2203010	4883990	5913000	8880400	1936510	4945030	1763050	4445910	3240740	4892470	6089910
Q9BVA1	Tubulin beta-2B chain	2	2	1	1	1	1	0	1	1	1	2	0	12063800	3880430	3840700	7347900	13772000	3039100	8811520	0	7160600	0	5165600	7315800
CON__P02538;P02538;CON__O95678;O95678;CON__P48668;P48668;CON__P04259	Keratin, type II cytoskeletal 6A;Keratin, type II cytoskeletal 75;Keratin, type II cytoskeletal 6C	0	0	0	0	0	0	4	0	0	0	0	0	0	0	0	0	0	0	0	0	0	266787000	0	0
CON__P08779;P08779;CON__Q9Z2K1;CON__Q3ZAW8	Keratin, type I cytoskeletal 16	1	0	0	0	0	0	4	0	0	0	0	0	391180	0	0	0	0	0	0	0	0	53698800	0	0
CON__P19012;P19012	Keratin, type I cytoskeletal 15	1	0	0	1	1	0	3	1	0	1	0	0	1784500	0	0	0	1352900	405880	0	0	495690	5670800	0	1106600
P23528;Q9Y281;P60981	Cofilin-1;Cofilin-2;Destrin	0	0	0	1	2	1	0	2	1	1	1	1	0	0	0	4557500	14127900	1692300	5288700	1603500	2496600	0	2359400	8222100
Q01469	Fatty acid-binding protein, epidermal	0	0	1	0	0	0	4	0	0	0	0	1	0	0	1364300	0	0	0	0	394550	0	8953010	0	0
Q7RTV0	PHD finger-like domain-containing protein 5A	4	2	2	3	2	2	3	6	2	3	4	2	16462520	6200400	2556400	5157000	5374600	5736000	10791840	2017160	9420200	7932400	3562200	18942850
P08195	4F2 cell-surface antigen heavy chain	2	2	1	3	4	0	3	4	1	3	0	0	1922820	683920	385950	0	6468400	1320150	0	0	4075300	3941490	656920	4424740
Q92841	Probable ATP-dependent RNA helicase DDX17	5	4	1	3	5	3	3	5	5	4	4	1	11682800	4561800	1333400	6126890	10492000	2687610	5922300	596390	5985200	4116430	5138050	9981100
Q15393	Splicing factor 3B subunit 3	23	18	10	17	24	19	17	24	12	18	23	7	83379200	30585840	15160610	42584950	114240500	26739110	66108380	5244340	47821280	45124720	16467630	82688000
P08238;Q58FF7;P07900;Q14568;Q58FG1	Heat shock protein HSP 90-beta;Putative heat shock protein HSP 90-beta-3;Heat shock protein HSP 90-alpha;Heat shock protein HSP 90-alpha A2;Putative heat shock protein HSP 90-alpha A4	2	0	1	2	2	2	2	2	1	1	2	1	12287400	0	901490	10279600	6836100	3135980	5464500	713280	6254400	7154600	1181900	5081000
P68363;P68366;Q9H853;Q9BQE3	Tubulin alpha-1B chain;Tubulin alpha-4A chain;Putative tubulin-like protein alpha-4B;Tubulin alpha-1C chain	0	1	0	0	2	2	0	2	1	0	1	0	0	3848000	0	30038000	24950300	0	9771300	0	0	0	5568000	26527200
CON__P02538;P02538;CON__P48668;P48668	Keratin, type II cytoskeletal 6A;Keratin, type II cytoskeletal 6C	0	0	0	0	0	0	2	0	0	1	0	0	0	0	0	0	0	0	0	0	1441900	36128000	0	0
CON__P02768-1;P02768	Serum albumin	0	0	0	0	0	0	2	0	0	0	0	0	0	0	0	0	0	0	0	0	0	3987600	0	0
CON__P08779;P08779;CON__P02533;P02533	Keratin, type I cytoskeletal 16;Keratin, type I cytoskeletal 14	0	0	0	0	0	0	2	0	0	0	0	0	0	0	0	0	0	0	0	0	0	24608200	0	0
CON__P08779;P08779;CON__Q9Z2K1;CON__Q3ZAW8;CON__P02533;P02533	Keratin, type I cytoskeletal 16;Keratin, type I cytoskeletal 14	0	0	0	0	0	0	2	0	0	0	0	0	0	0	0	0	0	0	0	0	0	53729000	0	0
CON__P20930;P20930	Filaggrin	0	0	0	0	0	0	2	0	0	0	0	0	0	0	0	0	0	0	0	0	0	16181400	0	0
CON__Q5D862;Q5D862	Filaggrin-2	0	0	0	0	0	0	2	0	0	0	2	0	0	0	0	0	0	0	1102510	0	0	9403400	0	0
P04259;CON__P04259	Keratin, type II cytoskeletal 6B	0	0	0	0	0	0	2	0	0	0	0	0	0	0	0	0	0	0	0	0	0	30711800	0	0
P07195;P00338	L-lactate dehydrogenase B chain;L-lactate dehydrogenase A chain	0	0	0	0	1	0	1	1	0	0	0	0	0	0	0	0	2007000	0	0	0	0	3274400	0	1867000
P25815	Protein S100-P	0	0	0	0	0	0	2	0	0	0	0	0	0	0	0	0	0	0	0	0	0	4961300	0	0
P29508;P48594	Serpin B3;Serpin B4	0	0	0	0	0	0	2	0	0	0	0	0	0	0	0	0	0	0	0	0	0	6471300	0	0
P61313	60S ribosomal protein L15	0	0	0	1	0	0	2	0	0	0	2	0	0	0	0	0	0	863480	1945700	0	0	2700710	0	0
Q6ZVX7	F-box only protein 50	0	0	0	0	0	0	2	0	0	0	0	0	0	0	0	0	0	0	0	0	0	15100200	0	0
Q96QA5	Gasdermin-A	0	0	0	1	0	0	2	0	0	0	0	0	0	0	0	0	0	371280	0	0	0	2241390	0	0
Q99623	Prohibitin-2	2	0	0	2	1	0	2	2	0	2	2	0	985730	0	0	0	708480	669070	853050	0	1331080	1298030	0	1629560
Q9BTE3	Mini-chromosome maintenance complex-binding protein	2	0	0	1	1	1	1	2	1	1	2	0	3608100	0	0	1257200	2394900	859990	2597130	0	1683600	1048800	326260	2001340
P62158	Calmodulin	3	3	3	3	2	4	3	4	4	3	2	4	15630000	4742650	38896800	63678700	10353300	5825560	7701070	12330240	33787900	20606400	11478750	33524470
Q9BPZ2;Q99865	Spindlin-2B;Spindlin-2A	4	1	2	3	3	5	3	3	3	4	3	4	10178300	587570	2043400	15533600	5370700	1637670	3696800	3034900	6289290	3072020	3030010	2647230
Q96F86	Enhancer of mRNA-decapping protein 3	2	1	1	2	2	2	2	1	2	1	1	0	3852000	703450	1361600	1477090	3667090	1302320	831000	0	371540	1897530	900080	358450
A1A4V9	Coiled-coil domain-containing protein C16orf93	0	0	0	0	0	0	0	1	0	0	0	0	0	0	0	0	0	0	0	0	0	0	0	3083000
CON__P02533;P02533;CON__Q61782	Keratin, type I cytoskeletal 14	0	0	0	0	0	0	1	0	0	0	1	0	0	0	0	0	0	0	1734400	0	0	5088400	0	0
CON__P02533;P02533;CON__Q61782;CON__Q04695;Q04695	Keratin, type I cytoskeletal 14;Keratin, type I cytoskeletal 17	0	0	0	0	0	0	1	0	0	0	0	0	0	0	0	0	0	0	0	0	0	3451500	0	0
CON__P02533;P02533;CON__Q6IFX2	Keratin, type I cytoskeletal 14	0	1	0	0	0	0	2	0	0	0	0	0	0	551820	0	0	0	0	0	0	0	9487100	0	0
CON__P08779;P08779;CON__Q9Z2K1;CON__Q3ZAW8;CON__P35900;CON__Q9D312;P35900;CON__P02533;P02533;CON__Q6IFX2;CON__Q61782;CON__Q04695;Q04695	Keratin, type I cytoskeletal 16;Keratin, type I cytoskeletal 20;Keratin, type I cytoskeletal 14;Keratin, type I cytoskeletal 17	0	0	0	0	0	0	1	0	0	0	1	0	0	0	0	0	0	0	2051200	0	0	76766000	0	0
CON__Q8N1N4-2;CON__Q7RTT2;Q8N1N4	Keratin, type II cytoskeletal 78	0	0	0	0	0	0	1	0	0	0	0	0	0	0	0	0	0	0	0	0	0	2426200	0	0
O14578	Citron Rho-interacting kinase	0	1	0	1	0	0	1	1	0	0	1	0	0	497220	0	0	0	713700	1140800	0	0	1355900	0	1186900
O60911	Cathepsin L2	0	0	0	0	0	0	1	0	0	0	0	0	0	0	0	0	0	0	0	0	0	3004900	0	0
P01834	Ig kappa chain C region	0	0	0	0	0	0	1	0	0	0	0	0	0	0	0	0	0	0	0	0	0	2716500	0	0
P01857;P01860	Ig gamma-1 chain C region;Ig gamma-3 chain C region	0	0	0	0	0	0	1	0	0	0	0	0	0	0	0	0	0	0	0	0	0	775900	0	0
P05089	Arginase-1	0	0	0	0	0	0	1	0	0	0	0	0	0	0	0	0	0	0	0	0	0	4831800	0	0
P06396	Gelsolin	0	0	0	0	0	0	1	0	0	0	0	0	0	0	0	0	0	0	0	0	0	2359300	0	0
P18669;Q8N0Y7	Phosphoglycerate mutase 1;Probable phosphoglycerate mutase 4	0	0	1	0	0	1	1	0	1	0	0	1	0	0	973670	2356000	0	0	0	1341100	0	2254800	1547500	0
P25311	Zinc-alpha-2-glycoprotein	0	0	0	0	0	0	1	0	0	0	0	0	0	0	0	0	0	0	0	0	0	2045100	0	0
P29373	Cellular retinoic acid-binding protein 2	0	0	0	0	0	0	1	0	0	0	0	0	0	0	0	0	0	0	0	0	0	1445900	0	0
P34931	Heat shock 70 kDa protein 1-like	0	0	0	0	0	0	0	1	0	0	1	0	0	0	0	0	0	0	315830	0	0	0	0	622590
P35908;CON__P35908;P04259;CON__P02538;P02538;CON__O95678;O95678;CON__P07744;CON__P48668;P48668;CON__P13647;P13647;CON__Q5XKE5;Q5XKE5;CON__P04259	Keratin, type II cytoskeletal 2 epidermal;Keratin, type II cytoskeletal 6B;Keratin, type II cytoskeletal 6A;Keratin, type II cytoskeletal 75;Keratin, type II cytoskeletal 6C;Keratin, type II cytoskeletal 5;Keratin, type II cytoskeletal 79	0	0	1	0	0	0	2	0	0	0	2	0	0	0	1100300	0	0	0	3722000	0	0	9339500	0	0
P37802;Q9UI15	Transgelin-2;Transgelin-3	0	0	0	0	0	0	0	0	1	0	1	0	0	0	0	0	0	0	1099000	0	0	0	1466000	0
P46778	60S ribosomal protein L21	0	0	0	0	0	0	0	1	0	0	0	0	0	0	0	0	0	0	0	0	0	0	0	1134500
P50914	60S ribosomal protein L14	0	0	1	1	0	0	1	1	0	0	0	0	0	0	711940	0	0	600200	0	0	0	916390	0	1393900
P51970	NADH dehydrogenase [ubiquinone] 1 alpha subcomplex subunit 8	0	0	0	0	0	0	0	1	0	1	0	0	0	0	0	0	0	0	0	0	1370600	0	0	713810
P53999	Activated RNA polymerase II transcriptional coactivator p15	0	0	1	0	0	1	0	1	1	1	1	1	0	0	2936400	5138800	0	0	1506500	1066000	982740	0	1210100	1659600
P68363;P68366;A6NHL2;Q9BQE3;Q71U36;Q13748;Q6PEY2	Tubulin alpha-1B chain;Tubulin alpha-4A chain;Tubulin alpha chain-like 3;Tubulin alpha-1C chain;Tubulin alpha-1A chain;Tubulin alpha-3C/D chain;Tubulin alpha-3E chain	0	0	0	1	1	0	1	0	0	1	0	0	0	0	0	0	3031200	2359000	0	0	586990	1159300	0	0
P68363;Q9BQE3;Q71U36;Q13748	Tubulin alpha-1B chain;Tubulin alpha-1C chain;Tubulin alpha-1A chain;Tubulin alpha-3C/D chain	0	0	0	0	0	0	0	1	0	0	0	0	0	0	0	0	0	0	0	0	0	0	0	1330200
Q01130	Serine/arginine-rich splicing factor 2	0	0	0	0	0	0	0	1	0	1	0	0	0	0	0	0	0	0	0	0	1136200	0	0	1499200
Q07954	Prolow-density lipoprotein receptor-related protein 1;Low-density lipoprotein receptor-related protein 1 85 kDa subunit;Low-density lipoprotein receptor-related protein 1 515 kDa subunit;Low-density lipoprotein receptor-related protein 1 intracellular domain	0	0	0	0	1	1	0	1	0	0	0	0	0	0	0	329560	1402200	0	0	0	0	0	0	433380
Q13835	Plakophilin-1	0	0	0	0	0	0	1	0	0	0	0	0	0	0	0	0	0	0	0	0	0	1562300	0	0
Q15233;P23246	Non-POU domain-containing octamer-binding protein;Splicing factor, proline- and glutamine-rich	0	0	1	0	1	0	0	1	1	1	0	0	0	0	4185100	0	5517500	0	0	0	3934200	0	3083500	3461700
Q16875;Q16877	6-phosphofructo-2-kinase/fructose-2,6-bisphosphatase 3;6-phosphofructo-2-kinase;Fructose-2,6-bisphosphatase;6-phosphofructo-2-kinase/fructose-2,6-bisphosphatase 4;6-phosphofructo-2-kinase;Fructose-2,6-bisphosphatase	0	1	0	1	0	0	1	0	1	1	0	0	0	1622300	0	0	0	1777200	0	0	2724800	2239900	1328900	0
Q5VT79;P13928	Annexin A8-like protein 2;Annexin A8	0	0	0	0	0	0	1	0	0	0	0	0	0	0	0	0	0	0	0	0	0	1267900	0	0
Q6NZY4	Zinc finger CCHC domain-containing protein 8	0	0	0	0	0	0	0	1	0	0	0	0	0	0	0	0	0	0	0	0	0	0	0	1593000
Q6P4Q7	Metal transporter CNNM4	0	0	0	0	1	1	0	1	0	1	0	0	0	0	0	15003000	44641000	0	0	0	2053100	0	0	37924000
Q86U42	Polyadenylate-binding protein 2	1	0	0	1	0	0	1	1	0	1	1	0	1218300	0	0	0	0	341770	1071700	0	1648500	930860	0	1106600
Q92947	Glutaryl-CoA dehydrogenase, mitochondrial	0	0	0	0	0	0	0	1	0	0	0	0	0	0	0	0	0	0	0	0	0	0	0	452080
Q99880;Q99879;Q99877;Q93079;Q8N257;Q5QNW6;Q16778;P62807;P58876;P33778;P23527;Q96A08	Histone H2B type 1-L;Histone H2B type 1-M;Histone H2B type 1-N;Histone H2B type 1-H;Histone H2B type 3-B;Histone H2B type 2-F;Histone H2B type 2-E;Histone H2B type 1-C/E/F/G/I;Histone H2B type 1-D;Histone H2B type 1-B;Histone H2B type 1-O;Histone H2B type 1-A	0	0	0	0	0	0	1	0	0	0	0	0	0	0	0	0	0	0	0	0	0	3187500	0	0
Q9NSE4	Isoleucine--tRNA ligase, mitochondrial	0	0	0	0	0	0	0	1	0	0	0	0	0	0	0	0	0	0	0	0	0	0	0	1067800
Q9NZI8;O00425	Insulin-like growth factor 2 mRNA-binding protein 1;Insulin-like growth factor 2 mRNA-binding protein 3	1	0	0	0	1	0	1	1	0	1	1	0	901910	0	0	0	1431100	0	687300	0	405700	413030	0	1661000
Q9P2E9	Ribosome-binding protein 1	0	0	1	0	1	0	1	1	0	0	1	1	0	0	765710	0	654430	0	284810	564590	0	607310	0	523800
Q9UN37	Vacuolar protein sorting-associated protein 4A	0	0	0	0	0	0	1	0	0	0	1	0	0	0	0	0	0	0	495710	0	0	354430	0	0
Q9Y241	HIG1 domain family member 1A, mitochondrial	0	0	0	1	0	1	1	0	0	0	1	0	0	0	0	538100	0	966630	521990	0	0	1889300	0	0
Q9Y6G3	39S ribosomal protein L42, mitochondrial	0	0	0	1	0	1	1	0	0	0	1	0	0	0	0	1519500	0	669990	983310	0	0	1055500	0	0
P13797	Plastin-3	1	0	2	1	1	1	1	1	2	2	1	1	857150	0	872960	1911900	2243000	558970	872740	403500	1496360	1470800	1485290	1461400
P19388	DNA-directed RNA polymerases I, II, and III subunit RPABC1	2	2	1	1	2	2	2	2	2	2	1	1	3325100	1389440	721770	2855790	5150100	707370	1056300	578050	3387800	2689500	1994910	2454700
P68371;P07437	Tubulin beta-4B chain;Tubulin beta chain	1	2	2	2	1	2	2	2	2	2	1	1	19478000	48221000	56537000	97324000	38850000	40770000	17466000	7524500	56932000	72783000	50923000	69488000
Q07666;Q5VWX1	KH domain-containing, RNA-binding, signal transduction-associated protein 1;KH domain-containing, RNA-binding, signal transduction-associated protein 2	1	2	2	1	2	2	2	2	2	1	1	2	5395700	1822870	2260320	3988440	5521730	2118000	460570	1662120	5048700	3473410	2709330	4125610
Q4VCS5;Q8IY63	Angiomotin;Angiomotin-like protein 1	1	1	1	1	1	1	1	1	2	1	1	1	5722100	687650	1411800	3439600	4436700	1382800	4591300	1246400	3588900	3014700	2471970	2562700
Q9ULX6	A-kinase anchor protein 8-like	2	1	0	2	1	0	2	2	0	2	2	1	3057000	920550	0	0	1737200	1057170	4811100	275440	3315570	2364280	0	2740200
CON__P02538;P02538;CON__O95678;O95678;CON__P07744;CON__Q8VED5;CON__Q5XKE5;Q5XKE5;CON__Q8N1N4-2;CON__Q7RTT2;Q8N1N4	Keratin, type II cytoskeletal 6A;Keratin, type II cytoskeletal 75;Keratin, type II cytoskeletal 79;Keratin, type II cytoskeletal 78	1	0	1	0	0	0	2	0	0	0	0	0	2671200	0	385580	0	0	0	0	0	0	23653900	0	0
CON__P08779;P08779;CON__P19012;P19012;CON__P02533;P02533;CON__Q6IFX2	Keratin, type I cytoskeletal 16;Keratin, type I cytoskeletal 15;Keratin, type I cytoskeletal 14	1	0	0	0	0	0	1	0	0	0	1	0	1442800	0	0	0	0	0	4025800	0	0	5610400	0	0
O00264;O15173	Membrane-associated progesterone receptor component 1;Membrane-associated progesterone receptor component 2	0	0	0	1	0	0	0	0	0	0	0	0	0	0	0	0	0	469310	0	0	0	0	0	0
O00268	Transcription initiation factor TFIID subunit 4	1	1	0	1	0	0	1	1	0	1	2	0	2217700	781100	0	0	0	749680	1871910	0	847150	1230300	0	1005400
O43504	Ragulator complex protein LAMTOR5	1	0	0	1	1	0	0	1	0	1	0	0	2085600	0	0	0	1099900	662740	0	0	1787000	0	0	563110
O43805	Sjoegren syndrome nuclear autoantigen 1	0	0	0	1	0	0	0	0	0	0	0	0	0	0	0	0	0	539200	0	0	0	0	0	0
O60271;Q9UPT6	C-Jun-amino-terminal kinase-interacting protein 4;C-Jun-amino-terminal kinase-interacting protein 3	2	1	2	2	2	2	2	1	2	2	2	2	8354000	1096500	3826200	4100900	7379200	2848500	3576700	1785520	3714400	4090600	3657000	2217100
O60506;O43390	Heterogeneous nuclear ribonucleoprotein Q;Heterogeneous nuclear ribonucleoprotein R	4	4	3	3	4	2	5	4	2	3	5	4	11323100	10166510	6294270	7625800	21161380	4133400	17657340	3433380	3193860	13728640	4624400	12689410
O75376	Nuclear receptor corepressor 1	1	0	0	1	1	0	1	0	0	0	0	0	1014600	0	0	0	738400	229730	0	0	0	733340	0	0
O95299	NADH dehydrogenase [ubiquinone] 1 alpha subcomplex subunit 10, mitochondrial	0	0	0	1	0	0	0	0	0	0	0	0	0	0	0	0	0	1133000	0	0	0	0	0	0
P00367	Glutamate dehydrogenase 1, mitochondrial	2	0	0	0	0	3	0	0	2	1	1	0	2929800	0	0	6708200	0	0	1195100	0	1526100	0	1560880	0
P00558;P07205	Phosphoglycerate kinase 1;Phosphoglycerate kinase 2	1	0	1	0	0	1	1	0	1	1	1	1	1966200	0	1772600	4979300	0	0	2929900	2102900	1310300	2324500	1792600	0
P04049	RAF proto-oncogene serine/threonine-protein kinase	0	0	0	0	1	0	0	0	0	0	0	0	0	0	0	0	690750	0	0	0	0	0	0	0
P04259;CON__P48668;P48668;CON__P04259	Keratin, type II cytoskeletal 6B;Keratin, type II cytoskeletal 6C	1	0	0	0	0	0	1	0	0	0	0	0	1377500	0	0	0	0	0	0	0	0	10934000	0	0
P04350;P68371;P07437;Q13885;Q9BVA1;Q9BUF5	Tubulin beta-4A chain;Tubulin beta-4B chain;Tubulin beta chain;Tubulin beta-2A chain;Tubulin beta-2B chain;Tubulin beta-6 chain	1	1	1	2	1	1	1	1	1	1	2	1	37081000	5125500	4668900	20388000	26668000	17064000	23815900	2060300	16385000	18969000	5806700	16196000
P04350;Q9BUF5	Tubulin beta-4A chain;Tubulin beta-6 chain	0	0	0	0	0	1	0	0	0	1	1	0	0	0	0	643740	0	0	1215100	0	586840	0	0	0
P06744	Glucose-6-phosphate isomerase	0	0	2	0	1	2	0	0	2	1	2	1	0	0	3423300	13483400	3873700	0	4654200	742740	1393600	0	4963200	0
P07195;Q6ZMR3;P07864;P00338	L-lactate dehydrogenase B chain;L-lactate dehydrogenase A-like 6A;L-lactate dehydrogenase C chain;L-lactate dehydrogenase A chain	1	0	0	1	0	1	0	0	1	1	1	1	5458800	0	0	6734900	0	3535600	2834800	2602300	4036700	0	3997300	0
P08559;P29803	Pyruvate dehydrogenase E1 component subunit alpha, somatic form, mitochondrial;Pyruvate dehydrogenase E1 component subunit alpha, testis-specific form, mitochondrial	1	0	0	0	0	0	1	0	0	0	0	0	1929100	0	0	0	0	0	0	0	0	936680	0	0
P09429	High mobility group protein B1	0	0	0	0	0	1	0	0	0	0	0	1	0	0	0	2902600	0	0	0	386350	0	0	0	0
P09884	DNA polymerase alpha catalytic subunit	0	0	0	0	0	1	0	0	0	1	0	0	0	0	0	266390	0	0	0	0	667160	0	0	0
P16615;O14983	Sarcoplasmic/endoplasmic reticulum calcium ATPase 2;Sarcoplasmic/endoplasmic reticulum calcium ATPase 1	1	0	0	1	1	0	0	1	0	1	0	0	1646300	0	0	0	4057400	847350	0	0	1679400	0	0	1242800
P25490;O15391;Q96MM3	Transcriptional repressor protein YY1;Transcription factor YY2;Zinc finger protein 42 homolog	0	0	0	0	1	0	0	0	0	1	1	0	0	0	0	0	1975000	0	1051300	0	1252800	0	0	0
P30520	Adenylosuccinate synthetase isozyme 2	0	0	0	0	0	1	0	0	0	1	0	1	0	0	0	1185500	0	0	0	550430	739880	0	0	0
P35908;CON__P35908;CON__Q5XKE5;Q5XKE5	Keratin, type II cytoskeletal 2 epidermal;Keratin, type II cytoskeletal 79	0	0	1	0	0	0	1	0	0	0	1	1	0	0	1989500	0	0	0	4942400	319380	0	5089500	0	0
P35908;CON__P35908;P04259;CON__P02538;P02538;CON__P48668;P48668;CON__P04259	Keratin, type II cytoskeletal 2 epidermal;Keratin, type II cytoskeletal 6B;Keratin, type II cytoskeletal 6A;Keratin, type II cytoskeletal 6C	0	1	0	0	0	0	1	0	0	0	1	1	0	2717100	0	0	0	0	16185000	3127900	0	210190000	0	0
P37802	Transgelin-2	1	0	2	0	0	2	0	1	2	0	2	2	1091600	0	2181840	3465420	0	0	1929960	2061850	0	0	1991450	848480
P46821;P78559	Microtubule-associated protein 1B;MAP1B heavy chain;MAP1 light chain LC1;Microtubule-associated protein 1A;MAP1A heavy chain;MAP1 light chain LC2	1	0	0	0	1	1	0	1	0	0	1	0	1896800	0	0	583470	1653300	0	874470	0	0	0	0	1142500
P47914	60S ribosomal protein L29	1	2	0	0	2	0	1	2	0	1	1	0	1572400	1816870	0	0	3701300	0	666180	0	632610	685730	0	3116800
P49459	Ubiquitin-conjugating enzyme E2 A	0	1	1	0	0	1	0	1	1	1	0	1	0	283030	626610	693100	0	0	0	565260	616240	0	918060	583080
P49773	Histidine triad nucleotide-binding protein 1	0	0	0	0	0	1	0	0	0	0	0	0	0	0	0	1913200	0	0	0	0	0	0	0	0
P55010	Eukaryotic translation initiation factor 5	0	0	0	0	0	2	0	0	0	0	0	0	0	0	0	2309780	0	0	0	0	0	0	0	0
P55084	Trifunctional enzyme subunit beta, mitochondrial;3-ketoacyl-CoA thiolase	0	1	1	0	0	1	0	1	1	1	1	1	0	1420200	656580	1679000	0	0	2572400	612940	4149200	0	1471100	2706100
P62424	60S ribosomal protein L7a	0	0	0	0	1	0	0	0	0	0	0	0	0	0	0	0	915430	0	0	0	0	0	0	0
P62495	Eukaryotic peptide chain release factor subunit 1	1	0	0	1	0	1	1	0	0	1	1	0	1890500	0	0	1275000	0	815060	735770	0	1486200	1308000	0	0
P62873;P62879	Guanine nucleotide-binding protein G(I)/G(S)/G(T) subunit beta-1;Guanine nucleotide-binding protein G(I)/G(S)/G(T) subunit beta-2	0	0	0	0	0	1	0	0	0	0	0	0	0	0	0	764350	0	0	0	0	0	0	0	0
P63151;Q66LE6	Serine/threonine-protein phosphatase 2A 55 kDa regulatory subunit B alpha isoform;Serine/threonine-protein phosphatase 2A 55 kDa regulatory subunit B delta isoform	0	0	0	0	1	0	0	0	0	1	1	0	0	0	0	0	1159800	0	1024400	0	1120600	0	0	0
Q01650	Large neutral amino acids transporter small subunit 1	0	0	0	0	1	0	0	0	0	0	0	0	0	0	0	0	3017100	0	0	0	0	0	0	0
Q02878	60S ribosomal protein L6	1	1	0	0	1	0	1	1	0	1	1	0	2568400	1134700	0	0	1899600	0	2651700	0	1638900	1265900	0	1890200
Q06830;P32119	Peroxiredoxin-1;Peroxiredoxin-2	1	1	1	1	2	1	1	1	1	1	2	1	70905000	19830000	11172000	22717000	172653500	25829000	75786400	6256300	38787000	71267000	16138000	67812000
Q13243	Serine/arginine-rich splicing factor 5	0	1	0	0	0	0	0	1	0	0	1	1	0	725570	0	0	0	0	1030400	410920	0	0	0	971780
Q13541	Eukaryotic translation initiation factor 4E-binding protein 1	1	0	0	0	1	1	0	0	1	0	1	0	597710	0	0	573620	573200	0	768370	0	0	0	744580	0
Q15287	RNA-binding protein with serine-rich domain 1	2	1	2	2	2	2	1	2	2	1	1	0	8575600	1865700	2475720	4775300	6706200	3225300	2617100	0	1733600	1869300	2530400	3266300
Q15645	Pachytene checkpoint protein 2 homolog	0	0	0	0	0	1	0	0	0	0	0	0	0	0	0	542010	0	0	0	0	0	0	0	0
Q3ZCQ8	Mitochondrial import inner membrane translocase subunit TIM50	1	1	0	1	0	0	1	1	0	1	1	0	3516800	933290	0	0	0	1628100	1227800	0	1713300	1672800	0	1704300
Q5SW79;Q96L14	Centrosomal protein of 170 kDa;Cep170-like protein	0	0	0	1	0	0	0	0	0	0	0	0	0	0	0	0	0	336900	0	0	0	0	0	0
Q7L576;Q96F07	Cytoplasmic FMR1-interacting protein 1;Cytoplasmic FMR1-interacting protein 2	1	1	1	1	1	2	1	1	1	1	1	1	2357300	688980	877440	2366100	1732600	780240	774050	355210	896350	1951500	957380	1294500
Q7L5N1	COP9 signalosome complex subunit 6	1	0	0	1	1	0	1	0	0	1	1	0	2820100	0	0	0	2366700	1583000	1066600	0	1488800	3162900	0	0
Q86VP6;O75155	Cullin-associated NEDD8-dissociated protein 1;Cullin-associated NEDD8-dissociated protein 2	1	0	0	0	1	1	0	1	0	0	0	0	946670	0	0	2218200	1669500	0	0	0	0	0	0	1207500
Q8IZS5	Orofacial cleft 1 candidate gene 1 protein	0	0	0	0	1	0	0	0	0	0	0	0	0	0	0	0	315630	0	0	0	0	0	0	0
Q92945;Q96AE4	Far upstream element-binding protein 2;Far upstream element-binding protein 1	0	0	1	0	0	0	0	0	1	0	0	1	0	0	1438200	0	0	0	0	432120	0	0	933930	0
Q96G46	tRNA-dihydrouridine(47) synthase [NAD(P)(+)]-like	0	0	0	1	0	0	0	0	0	0	0	0	0	0	0	0	0	989240	0	0	0	0	0	0
Q99880;Q99879;Q99877;Q93079;Q8N257;Q5QNW6;Q16778;P62807;P58876;P33778;P23527;P57053;P06899;O60814;Q96A08	Histone H2B type 1-L;Histone H2B type 1-M;Histone H2B type 1-N;Histone H2B type 1-H;Histone H2B type 3-B;Histone H2B type 2-F;Histone H2B type 2-E;Histone H2B type 1-C/E/F/G/I;Histone H2B type 1-D;Histone H2B type 1-B;Histone H2B type 1-O;Histone H2B type F-S;Histone H2B type 1-J;Histone H2B type 1-K;Histone H2B type 1-A	1	1	0	1	0	0	1	1	0	0	1	0	2451500	1033400	0	0	0	1402900	801430	0	0	7296200	0	877730
Q9BW92	Threonine--tRNA ligase, mitochondrial	0	0	0	0	0	1	0	0	0	0	0	0	0	0	0	679600	0	0	0	0	0	0	0	0
Q9BXJ9	N-alpha-acetyltransferase 15, NatA auxiliary subunit	1	0	0	1	1	0	0	1	0	0	0	1	3122500	0	0	0	1905000	1151600	0	795490	0	0	0	2886000
Q9H000	Probable E3 ubiquitin-protein ligase makorin-2	0	0	0	1	0	0	0	0	0	0	1	0	0	0	0	0	0	370550	1886000	0	0	0	0	0
Q9H0B6	Kinesin light chain 2	1	1	1	1	2	1	1	1	1	1	1	1	7053600	1625800	3283400	8301100	8080850	1554700	5911200	1446900	4794700	4252900	3281700	4027200
Q9NUG6	p53 and DNA damage-regulated protein 1	0	0	0	0	1	0	0	0	0	0	0	0	0	0	0	0	2047000	0	0	0	0	0	0	0
Q9NVA2;Q14141;Q92599	Septin-11;Septin-6;Septin-8	1	2	1	1	1	1	1	2	1	1	1	0	2193600	3259090	1207600	5368900	8329200	2252200	5139300	0	3673500	4731000	2705400	10401400
Q9NVI7	ATPase family AAA domain-containing protein 3A	0	1	0	1	1	0	1	0	0	0	0	0	0	501770	0	0	460250	224380	0	0	0	265120	0	0
Q9UBB4	Ataxin-10	0	0	0	0	0	1	0	0	0	0	1	1	0	0	0	2952500	0	0	1355300	461730	0	0	0	0
Q9UBS4	DnaJ homolog subfamily B member 11	0	0	0	0	0	1	0	0	0	1	1	0	0	0	0	1084000	0	0	729300	0	696040	0	0	0
Q9UEG4	Zinc finger protein 629	1	1	0	0	1	0	1	1	0	1	1	0	1028800	757640	0	0	1832500	0	1231000	0	799860	2063800	0	1861500
Q9UHD1	Cysteine and histidine-rich domain-containing protein 1	1	0	1	0	0	1	0	1	1	0	1	0	844310	0	688310	1060600	0	0	1438300	0	0	0	626780	582120
Q9UJS0;O75746	Calcium-binding mitochondrial carrier protein Aralar2;Calcium-binding mitochondrial carrier protein Aralar1	0	0	0	1	0	0	0	0	0	0	0	0	0	0	0	0	0	1069100	0	0	0	0	0	0
Q9UJU6	Drebrin-like protein	0	0	0	0	0	1	0	0	0	0	1	0	0	0	0	925720	0	0	750340	0	0	0	0	0
Q9UK76	Hematological and neurological expressed 1 protein;Hematological and neurological expressed 1 protein, N-terminally processed	0	0	0	0	0	1	0	0	0	0	0	0	0	0	0	1587900	0	0	0	0	0	0	0	0
Q9UKK9	ADP-sugar pyrophosphatase	2	2	2	1	2	2	2	2	2	2	1	1	3806200	1100470	1735530	5978600	4677800	1057300	1988000	553300	4941300	6175500	1761060	2866600
Q9ULC4	Malignant T-cell-amplified sequence 1	0	0	0	0	0	1	0	0	0	0	0	0	0	0	0	1767600	0	0	0	0	0	0	0	0
Q9UPW6	DNA-binding protein SATB2	1	0	1	1	1	2	1	1	0	0	0	0	3357600	0	2382900	2066900	2606200	813280	0	0	0	1848000	0	1066400
Q9UQ88;P21127	Cyclin-dependent kinase 11A;Cyclin-dependent kinase 11B	0	0	1	0	0	0	0	1	0	0	0	0	0	0	1101500	0	0	0	0	0	0	0	0	668740
Q9Y2R5	28S ribosomal protein S17, mitochondrial	0	0	0	0	0	1	0	0	0	0	0	0	0	0	0	1634200	0	0	0	0	0	0	0	0
Q9Y6H1;Q5T1J5	Coiled-coil-helix-coiled-coil-helix domain-containing protein 2;Putative coiled-coil-helix-coiled-coil-helix domain-containing protein CHCHD2P9, mitochondrial	1	0	1	0	0	1	1	0	1	1	0	0	3304000	0	685220	2434300	0	0	0	0	1480800	1879100	1419500	0
P26599	Polypyrimidine tract-binding protein 1	2	3	1	2	2	4	2	2	1	1	2	1	6865300	3356910	994410	9291400	3188000	1888610	5801600	1020800	2455900	2767260	1212300	3772700
Q01844	RNA-binding protein EWS	2	1	1	1	1	2	1	1	1	1	2	1	6130100	592230	1690800	5924000	4903200	2042000	4596300	1047900	3730300	1139100	1950900	3788500
Q09161	Nuclear cap-binding protein subunit 1	3	2	1	2	3	1	2	2	1	3	2	0	7803200	1942580	732910	815110	7358600	1681190	2896000	0	4376020	2261830	937840	3268000
Q13547	Histone deacetylase 1	3	2	1	3	1	2	3	1	1	3	3	1	5843500	997170	928940	1829490	2846100	2323950	3847240	389120	3841420	2921930	426920	1067400
Q6IN85	Serine/threonine-protein phosphatase 4 regulatory subunit 3A	2	1	1	2	1	1	1	1	1	2	1	0	6656100	953050	969920	1960500	2046600	2124630	1090300	0	3336400	2047400	533680	1202600
Q92598;P34932;O95757	Heat shock protein 105 kDa;Heat shock 70 kDa protein 4;Heat shock 70 kDa protein 4L	2	1	1	1	2	1	1	1	1	1	1	1	14860000	3338200	3982900	9143100	15589900	6074000	15155000	3227900	10644000	10787000	6463500	8948400
CON__P08779;P08779;CON__A2A4G1;CON__P19001;CON__P19012;P19012;CON__P02533;P02533;CON__Q6IFX2;CON__Q04695;Q04695	Keratin, type I cytoskeletal 16;Keratin, type I cytoskeletal 15;Keratin, type I cytoskeletal 14;Keratin, type I cytoskeletal 17	1	1	0	0	0	0	1	0	0	0	1	1	1720000	1312000	0	0	0	0	3658600	740180	0	63175000	0	0
CON__P08779;P08779;CON__A2A4G1;CON__P19001;CON__Q99456;Q99456;CON__P19012;P19012;CON__P13645;P13645;CON__P02533;P02533;CON__Q04695;Q04695	Keratin, type I cytoskeletal 16;Keratin, type I cytoskeletal 12;Keratin, type I cytoskeletal 15;Keratin, type I cytoskeletal 10;Keratin, type I cytoskeletal 14;Keratin, type I cytoskeletal 17	0	1	1	0	0	0	1	0	0	0	1	1	0	1817100	1644100	0	0	0	3542200	639840	0	19349000	0	0
O00148	ATP-dependent RNA helicase DDX39A	1	0	0	0	0	1	0	0	0	0	0	0	1608900	0	0	1907700	0	0	0	0	0	0	0	0
O14545	TRAF-type zinc finger domain-containing protein 1	2	0	0	1	1	0	1	0	0	1	1	0	1456530	0	0	0	407290	230980	73313	0	466150	312030	0	0
O14980	Exportin-1	1	0	0	0	1	0	0	0	0	1	0	0	1561800	0	0	0	745050	0	0	0	899720	0	0	0
O15067	Phosphoribosylformylglycinamidine synthase	1	0	0	0	0	1	0	0	0	0	0	0	778630	0	0	646680	0	0	0	0	0	0	0	0
O43491	Band 4.1-like protein 2	1	0	0	1	0	0	0	0	0	0	0	0	2728200	0	0	0	0	861960	0	0	0	0	0	0
O60684	Importin subunit alpha-7	1	1	0	1	1	0	1	0	0	2	0	1	3036200	1015500	0	0	908230	409020	0	353000	2743340	1131700	0	0
P08670;P17661	Vimentin;Desmin	1	0	0	0	1	0	0	0	0	0	0	0	2013700	0	0	0	2022900	0	0	0	0	0	0	0
P11310	Medium-chain specific acyl-CoA dehydrogenase, mitochondrial	1	0	0	1	0	0	0	0	0	0	0	1	755000	0	0	0	0	417910	0	272590	0	0	0	0
P11940;Q4VXU2	Polyadenylate-binding protein 1;Polyadenylate-binding protein 1-like	1	0	1	1	1	0	1	0	0	1	1	1	4157900	0	1979100	0	6086800	1343900	2467000	883300	2761300	2003900	0	0
P14678	Small nuclear ribonucleoprotein-associated proteins B and B	0	0	1	0	1	0	0	0	0	0	1	0	0	0	23893	0	36566	0	25009	0	0	0	0	0
P16949	Stathmin	0	0	2	0	0	2	0	0	1	1	0	2	0	0	2445720	3286470	0	0	0	1234730	1221600	0	303150	0
P27635;Q96L21	60S ribosomal protein L10;60S ribosomal protein L10-like	1	0	0	1	0	0	0	0	0	1	1	0	2256500	0	0	0	0	785350	1539900	0	706970	0	0	0
P30050	60S ribosomal protein L12	1	0	0	1	0	0	0	0	0	0	0	0	1089800	0	0	0	0	375630	0	0	0	0	0	0
P42771	Cyclin-dependent kinase inhibitor 2A	0	2	0	1	0	1	1	0	0	0	2	0	0	660420	0	961460	0	2231500	2890420	0	0	590390	0	0
P62877	E3 ubiquitin-protein ligase RBX1;E3 ubiquitin-protein ligase RBX1, N-terminally processed	1	0	0	1	0	0	0	0	0	0	1	0	1096900	0	0	0	0	593230	700750	0	0	0	0	0
P63241;Q6IS14	Eukaryotic translation initiation factor 5A-1;Eukaryotic translation initiation factor 5A-1-like	0	1	1	1	1	0	0	1	0	1	1	1	0	1767300	1686200	0	5019500	1476200	4521800	974530	2105700	0	0	2149700
P67809;P16989	Nuclease-sensitive element-binding protein 1;Y-box-binding protein 3	0	1	1	1	1	0	0	1	0	0	1	0	0	1026700	584380	0	2215600	861090	1076300	0	0	0	0	1421500
P68133;P68032;P63267;P62736	Actin, alpha skeletal muscle;Actin, alpha cardiac muscle 1;Actin, gamma-enteric smooth muscle;Actin, aortic smooth muscle	1	0	1	1	0	1	1	0	0	0	0	0	3027800	0	4194100	9677700	0	1517600	0	0	0	3060600	0	0
Q15007	Pre-mRNA-splicing regulator WTAP	1	0	0	0	2	0	0	0	0	0	1	0	851970	0	0	0	2184790	0	458480	0	0	0	0	0
Q15021	Condensin complex subunit 1	1	1	0	0	1	1	0	0	1	0	1	0	1107500	669200	0	629180	1616900	0	851320	0	0	0	698040	0
Q15042	Rab3 GTPase-activating protein catalytic subunit	1	0	0	1	0	0	0	0	0	1	0	0	2132400	0	0	0	0	746960	0	0	1058100	0	0	0
Q3MHD2	Protein LSM12 homolog	1	1	0	1	0	1	1	0	0	1	1	0	1563300	458850	0	2055100	0	1303300	866240	0	1681800	1365600	0	0
Q4V348	Zinc finger protein 658B	1	0	0	1	0	0	0	0	0	0	0	0	6130600	0	0	0	0	679540	0	0	0	0	0	0
Q5T653	39S ribosomal protein L2, mitochondrial	1	1	0	0	0	0	0	1	0	1	0	0	1848800	777960	0	0	0	0	0	0	1235000	0	0	1801600
Q8NI27	THO complex subunit 2	1	0	0	0	1	0	0	0	0	0	0	0	1599800	0	0	0	622550	0	0	0	0	0	0	0
Q96CS2	HAUS augmin-like complex subunit 1	1	0	0	1	0	0	0	0	0	0	0	0	1292300	0	0	0	0	619480	0	0	0	0	0	0
Q96CX2	BTB/POZ domain-containing protein KCTD12	1	0	0	0	1	0	0	0	0	0	0	0	1555600	0	0	0	1095600	0	0	0	0	0	0	0
Q99426	Tubulin-folding cofactor B	1	0	0	0	0	1	0	0	0	0	0	0	1149000	0	0	2938000	0	0	0	0	0	0	0	0
Q9BWF3	RNA-binding protein 4	1	0	1	0	0	0	0	0	1	0	0	0	552860	0	519590	0	0	0	0	0	0	0	574320	0
Q9NQT5	Exosome complex component RRP40	0	1	0	0	1	0	0	0	0	0	1	1	0	673430	0	0	921490	0	881330	211620	0	0	0	0
Q9NXV2;Q14681;Q8N5Z5	BTB/POZ domain-containing protein KCTD5;BTB/POZ domain-containing protein KCTD2;BTB/POZ domain-containing protein KCTD17	1	0	1	1	1	0	1	0	0	1	0	0	529330	0	924440	0	782730	1604300	0	0	344500	489570	0	0
Q9Y247;Q14320	Protein FAM50B;Protein FAM50A	0	0	1	0	0	1	0	0	0	0	0	1	0	0	496630	884820	0	0	0	596890	0	0	0	0
Q9Y4L1	Hypoxia up-regulated protein 1	1	0	0	0	1	0	0	0	0	1	0	0	1881000	0	0	0	997310	0	0	0	1378200	0	0	0
Q9Y5Y2	Cytosolic Fe-S cluster assembly factor NUBP2	0	0	1	0	0	1	0	0	0	0	1	0	0	0	1161400	1009500	0	0	1416300	0	0	0	0	0
O94763	Unconventional prefoldin RPB5 interactor 1	2	1	0	1	0	0	1	1	0	0	0	0	2704300	369210	0	0	0	293630	0	0	0	917380	0	715660
P04264;CON__P04264;CON__H-INV:HIT000016045;P04259;CON__P02538;P02538;CON__Q8VED5;CON__P48668;P48668;CON__P13647;P13647;CON__P04259;CON__P05787;P05787	Keratin, type II cytoskeletal 1;Keratin, type II cytoskeletal 6B;Keratin, type II cytoskeletal 6A;Keratin, type II cytoskeletal 6C;Keratin, type II cytoskeletal 5;Keratin, type II cytoskeletal 8	1	1	1	0	1	0	1	1	0	0	1	1	5871200	16148000	6265700	0	3260900	0	44893000	2973900	0	11492000	0	1789700
P62847	40S ribosomal protein S24	1	1	1	0	2	1	0	2	0	0	1	0	5325500	286340	1605900	957900	4763800	0	2747800	0	0	0	0	3622510
Q00341	Vigilin	2	1	0	0	0	0	2	0	0	1	1	0	2302810	322690	0	0	0	0	389980	0	560990	2993050	0	0
Q9Y2S7	Polymerase delta-interacting protein 2	2	1	0	0	1	0	1	1	0	0	1	0	5662100	837060	0	0	1752600	0	1850400	0	0	1188900	0	1257300
P06454	Prothymosin alpha;Prothymosin alpha, N-terminally processed;Thymosin alpha-1	2	1	2	1	0	2	2	0	2	1	1	2	2902960	1483200	5677100	10438800	0	1091900	1509700	5399600	2974600	2678200	5989900	0
Q9NZI8	Insulin-like growth factor 2 mRNA-binding protein 1	3	1	1	1	2	0	1	2	1	2	3	1	5577700	814740	499840	0	5414400	428620	2729660	347120	1668070	1335900	414260	4367200
P50402	Emerin	4	3	1	2	2	1	2	3	1	2	3	1	5867000	1958010	458880	1527600	4081700	1877090	3747490	395030	2151660	3117470	1149800	2980600
O75369;P21333	Filamin-B;Filamin-A	0	1	1	0	0	1	0	0	0	1	1	0	0	465240	918240	980860	0	0	1157200	0	1771800	0	0	0
P04350	Tubulin beta-4A chain	2	0	0	0	1	0	0	0	0	1	1	0	50530500	0	0	0	74827000	0	45174000	0	40979000	0	0	0
P17858	ATP-dependent 6-phosphofructokinase, liver type	1	0	1	0	0	1	0	0	0	0	0	0	1351100	0	750180	1138000	0	0	0	0	0	0	0	0
P46779	60S ribosomal protein L28	1	1	0	0	1	0	0	0	0	0	1	0	2092200	567680	0	0	1580700	0	2764700	0	0	0	0	0
Q08378	Golgin subfamily A member 3	2	0	0	0	2	0	0	0	0	0	0	0	3112300	0	0	0	2214200	0	0	0	0	0	0	0
Q7Z5K2	Wings apart-like protein homolog	2	0	0	0	0	1	0	0	0	0	0	1	2996200	0	0	419930	0	0	0	613550	0	0	0	0
Q9P1Y5;Q5T5Y3	Calmodulin-regulated spectrin-associated protein 3;Calmodulin-regulated spectrin-associated protein 1	1	0	1	0	0	1	0	0	0	1	0	0	3916700	0	2704200	5064700	0	0	0	0	2875800	0	0	0
Q9UGP4	LIM domain-containing protein 1	2	1	1	2	1	1	0	1	1	1	2	1	4861400	889660	752330	1645500	2184300	1925100	2774900	585780	1955100	0	1109000	1208400
Q9UKX7	Nuclear pore complex protein Nup50	1	0	1	0	0	1	0	0	0	0	0	0	1175800	0	550080	1023600	0	0	0	0	0	0	0	0
CON__P07477;P07477;Q8NHM4;P07478	Trypsin-1;Alpha-trypsin chain 1;Alpha-trypsin chain 2;Putative trypsin-6;Trypsin-2	2	2	2	1	1	1	1	1	2	1	1	2	76001900	3988900	9032700	3266700	3610500	51692000	1129100	3225960	1847100	72144000	7409300	2304300
P21912	Succinate dehydrogenase [ubiquinone] iron-sulfur subunit, mitochondrial	3	3	0	2	1	0	2	1	1	1	2	0	8558400	2399460	0	0	1947200	2522800	3228700	0	1644800	2732200	622430	1366500
P26639	Threonine--tRNA ligase, cytoplasmic	2	2	1	1	2	1	1	1	1	1	1	2	3103410	1963530	371890	2516900	12136510	1023000	18235000	2096160	3220200	10820000	4170700	9237600
Q13015	Protein AF1q	1	1	1	0	0	0	1	0	0	2	1	1	1385700	300030	985370	0	0	0	393800	500990	2436800	798350	0	0
Q9BY77	Polymerase delta-interacting protein 3	3	3	0	0	2	1	0	2	2	2	3	0	6189300	1243670	0	636280	2512520	0	2915570	0	2046530	0	1306080	2624030
Q9C0C9	E2/E3 hybrid ubiquitin-protein ligase UBE2O	2	0	1	1	0	1	1	0	0	2	2	0	2979800	0	643000	2006800	0	771800	1802600	0	2422300	960220	0	0
O60610	Protein diaphanous homolog 1	10	8	2	6	8	5	5	8	5	9	9	5	22940100	6667820	2695100	7245840	21140160	6451800	11716800	3621150	14765800	7732250	4502700	9740260
P32322	Pyrroline-5-carboxylate reductase 1, mitochondrial	5	2	1	2	2	2	2	2	1	5	2	0	14942700	2165830	1860100	3685300	7123900	1356460	1610120	0	8397080	4271400	1722500	3001730
P13489	Ribonuclease inhibitor	1	1	1	0	1	0	0	0	0	1	2	0	1168600	580910	410270	0	3550500	0	1478620	0	847820	0	0	0
P30622	CAP-Gly domain-containing linker protein 1	8	10	2	5	9	5	5	9	3	6	6	3	14948400	7954540	1541440	4139070	25128600	3685540	6730780	1604420	8120680	7056890	2242650	13380400
P55060	Exportin-2	2	1	1	0	0	0	1	0	0	0	1	1	3426000	819160	866210	0	0	0	2146300	923240	0	1063100	0	0
Q02952	A-kinase anchor protein 12	1	2	0	1	0	0	0	0	0	0	0	0	1550500	708960	0	0	0	1222000	0	0	0	0	0	0
Q16877	6-phosphofructo-2-kinase/fructose-2,6-bisphosphatase 4;6-phosphofructo-2-kinase;Fructose-2,6-bisphosphatase	2	1	0	1	0	0	0	0	0	1	1	0	4169900	478120	0	0	0	903720	911280	0	1234600	0	0	0
Q9Y5K6	CD2-associated protein	1	1	1	1	0	0	0	0	0	1	1	0	1782000	650830	1060600	0	0	849770	2019900	0	2208500	0	0	0
Q9Y6Y8	SEC23-interacting protein	2	1	0	1	0	0	0	0	0	1	0	0	5907300	434510	0	0	0	964200	0	0	861240	0	0	0
Q9UNS2	COP9 signalosome complex subunit 3	5	2	3	2	1	2	3	1	2	3	2	1	11099000	2067520	2164860	2414300	1797000	1416030	2142780	485800	4454200	3239650	2319300	1765000
P08708	40S ribosomal protein S17	4	4	2	2	4	2	3	2	0	3	3	2	26087600	7407010	3441260	6035800	14080900	2867580	13953600	2778320	11455300	21055000	0	9627600
Q9H0G5	Nuclear speckle splicing regulatory protein 1	2	1	2	3	1	3	3	2	3	1	1	2	4111000	990850	2109030	5158700	1819100	2511520	997830	2364200	1976500	3193570	3725420	1394070
P60660	Myosin light polypeptide 6	3	4	4	2	4	4	3	4	4	4	3	3	17151700	11765200	23076600	29260200	31845500	3359900	11580300	11685900	24185400	14668000	16514900	25236900
P35613	Basigin	5	2	1	6	6	7	4	6	7	7	7	3	17685120	3121100	862510	29212300	27186400	16928000	18591600	3937880	28277900	21523800	13461080	16242500
P27348	14-3-3 protein theta	4	6	5	7	6	6	7	6	5	5	5	5	36641700	32676300	19491500	32138300	54471900	28748310	32754100	11551740	34224800	46448800	20940500	40955900
Q14103	Heterogeneous nuclear ribonucleoprotein D0	8	6	4	7	7	6	7	7	7	8	8	6	43647300	14737200	8308720	16803600	36294900	11668530	36791200	5655900	30301170	26755600	10850950	27919200
P50552	Vasodilator-stimulated phosphoprotein	3	3	2	3	4	4	2	4	4	3	1	1	4155700	961880	1385650	5585300	6476200	1848330	1529500	961440	3655770	1876730	4041390	4816360
Q15428	Splicing factor 3A subunit 2	9	6	6	8	10	8	8	10	5	7	7	4	21642600	7378510	8906110	11757820	43412050	9594770	14010190	4263760	13250090	17718300	2587010	25728100
Q16875;O60825	6-phosphofructo-2-kinase/fructose-2,6-bisphosphatase 3;6-phosphofructo-2-kinase;Fructose-2,6-bisphosphatase;6-phosphofructo-2-kinase/fructose-2,6-bisphosphatase 2;6-phosphofructo-2-kinase;Fructose-2,6-bisphosphatase	4	2	2	4	4	3	4	3	3	3	3	1	66485100	18555100	9488100	26733600	50427000	28466800	36518000	3105900	25607500	38075800	13582000	36134900
O43707;P35609;Q08043;P12814	Alpha-actinin-4;Alpha-actinin-2;Alpha-actinin-3;Alpha-actinin-1	2	1	2	2	3	3	2	3	2	2	1	2	7548200	883690	3141100	7883100	9114300	2479300	1502000	2193600	4700000	5641700	2567000	5437000
O75832	26S proteasome non-ATPase regulatory subunit 10	2	4	3	3	4	3	4	4	3	3	4	1	5260500	5637080	3023320	12131900	24047300	3433550	12922900	469080	8776300	8853020	7317340	8007520
Q9UHV9	Prefoldin subunit 2	8	5	4	5	7	6	6	7	6	6	7	6	32196700	8912900	8407100	27768100	40872300	9744590	32496540	9721970	24789900	21862100	17712200	25264100
P14174	Macrophage migration inhibitory factor	2	2	3	2	2	3	2	2	4	2	3	3	10018000	2708000	15159200	36868300	8243600	3251100	17344700	12801420	13031900	16924100	22843400	9159200
P28072	Proteasome subunit beta type-6	3	5	4	4	4	4	4	4	5	4	4	3	22297600	16483110	11738200	29432100	62657600	14227950	30323500	7618600	25677700	42229200	23420860	33441700
P33176;O60282	Kinesin-1 heavy chain;Kinesin heavy chain isoform 5C	5	4	5	4	5	5	4	5	6	4	4	2	24291800	7868440	6981310	14852420	20676800	8060300	10322200	2275080	15904900	14260800	10136420	13466450
Q08211	ATP-dependent RNA helicase A	5	7	1	3	5	4	4	5	4	4	5	1	7606670	5466230	434730	3095670	10752200	3123470	7134950	334060	4686810	6402500	3531900	8850400
Q16630	Cleavage and polyadenylation specificity factor subunit 6	5	5	5	5	5	5	5	5	4	4	4	4	14486900	8980120	11203400	15448700	14985000	9483250	13739660	5685680	14547500	10057640	7285480	10402560
P37108	Signal recognition particle 14 kDa protein	5	6	6	5	5	5	5	6	5	6	6	6	23799200	8934300	8589320	13299160	16093400	7030070	13125160	4512760	16514160	11359740	7672670	13660870
Q92734	Protein TFG	3	3	3	2	3	3	2	3	2	3	3	1	15119800	5422280	7743900	8492250	15419100	4212200	7946100	2711000	9299700	6120900	4972200	9024100
O95721	Synaptosomal-associated protein 29	3	4	3	3	2	2	3	2	3	3	3	2	8767800	2728610	8263300	5890800	5690600	3348890	4824600	2246350	7143460	7940600	6304600	3914600
Q9NYJ8	TGF-beta-activated kinase 1 and MAP3K7-binding protein 2	39	33	33	33	33	29	33	33	33	35	34	30	496395700	165143040	126530970	167698800	283057200	158715550	250457300	65327290	289944250	238912000	131510580	232863000
Q05639	Elongation factor 1-alpha 2	5	4	2	4	5	3	5	5	3	5	5	2	44770900	17340200	5057000	11021400	54380600	9837860	35582500	2330690	21205400	25144410	8733000	32647100
Q9P258	Protein RCC2	4	3	5	1	5	5	1	5	4	6	5	3	5572500	2829480	4322110	9508840	13451980	482580	8354580	2260160	7350760	1386800	3737890	8464000
P60900	Proteasome subunit alpha type-6	14	16	15	15	18	15	16	18	15	16	15	13	63288000	36372660	35616220	57908590	156615200	33553100	75260620	21962870	89392000	75876200	49140350	87917700
P62633	Cellular nucleic acid-binding protein	12	10	12	12	13	12	12	13	13	13	11	8	136618300	39030600	70891580	83816260	129107100	60118850	84597200	27293200	85490150	79827100	59327300	75023190
P68133;P68032;P63267;P62736;P60709;P63261	Actin, alpha skeletal muscle;Actin, alpha cardiac muscle 1;Actin, gamma-enteric smooth muscle;Actin, aortic smooth muscle;Actin, cytoplasmic 1;Actin, cytoplasmic 1, N-terminally processed;Actin, cytoplasmic 2;Actin, cytoplasmic 2, N-terminally processed	10	10	11	10	11	11	10	10	11	9	11	9	171313100	56683800	138249600	191109400	163986900	74263560	136198400	66853900	105353100	140790150	104065600	79107300
Q9Y657	Spindlin-1	34	30	30	29	29	28	29	29	30	32	28	26	952997180	248618290	373013140	520697810	616429800	247541630	483700920	188645490	524558110	448380840	392514640	489861260
CON__P00761		18	20	21	20	20	23	20	20	24	22	16	25	5152515500	4274751930	7450301100	6214207400	5883557700	3943660400	5764957900	5449214390	6372370660	6562810900	8100831240	5995145000
Q15046	Lysine--tRNA ligase	4	4	1	4	6	1	4	5	1	4	4	2	11179900	4966270	1219500	1936000	20093410	4381320	7895100	1641390	9127900	7741310	1239000	10033570
P46776	60S ribosomal protein L27a	4	6	2	2	6	2	3	6	2	5	5	2	18288500	24906510	2265640	3280760	34817700	6270760	14764000	2206580	14132840	8270610	1781250	21864520
P51649	Succinate-semialdehyde dehydrogenase, mitochondrial	28	19	2	23	22	4	21	23	2	24	16	2	271655080	40104310	811360	3810790	88113170	72254000	50718880	548380	135196500	106957380	1718340	80854780
P61247	40S ribosomal protein S3a	14	12	6	10	10	12	11	9	6	10	11	4	40709560	17791980	9014520	25092580	26900480	13606090	21840530	3332530	18230740	22084760	9781860	23609910
CON__Q04695;Q04695	Keratin, type I cytoskeletal 17	3	0	1	1	1	0	33	0	0	0	1	1	2674030	0	937920	0	1291500	206360	535710	550210	0	690638300	0	0
P04792	Heat shock protein beta-1	1	0	0	0	1	0	5	0	1	0	1	1	2936200	0	0	0	2262800	0	1355600	501270	0	45556100	926700	0
P05023	Sodium/potassium-transporting ATPase subunit alpha-1	5	3	0	4	7	4	5	2	3	6	4	0	10107700	2702930	0	7498910	36088520	3349720	15793600	0	17491140	10718470	6957140	11822000
Q07021	Complement component 1 Q subcomponent-binding protein, mitochondrial	4	3	7	7	2	4	2	3	3	3	4	2	29763640	44317700	50324850	73280200	17774400	12129610	19217000	4190700	18372710	15852900	11504100	18483660
P06702	Protein S100-A9	0	0	0	2	1	0	26	0	0	0	0	1	0	0	0	0	539060	1558560	0	389830	0	2513977610	0	0
Q15750	TGF-beta-activated kinase 1 and MAP3K7-binding protein 1	57	53	51	55	55	56	54	56	52	58	54	43	1329350500	413407210	382633850	873808200	1106748200	516872300	862931390	264713210	1172082100	898676250	583598050	741437740
P54105	Methylosome subunit pICln	17	19	17	18	17	12	17	18	16	18	18	14	868159700	298749440	366105000	469019600	862901400	274919700	808692670	126490880	729637800	788701400	290095320	852852800
P46777	60S ribosomal protein L5	8	5	5	6	4	7	5	5	3	7	7	1	30555450	6597000	9318200	18003000	18813000	11095970	22197700	1270300	25684860	13844900	5520700	9325020
P62306	Small nuclear ribonucleoprotein F	4	1	0	3	5	5	4	4	1	4	4	0	24216120	1227300	0	10923410	38259700	5000300	13711300	0	15990000	15031240	396930	13428400
Q9Y657;Q5JUX0	Spindlin-1;Spindlin-3	5	2	6	4	6	6	5	5	2	6	6	3	56818000	3149500	31656400	21297200	33286700	8592510	40263200	4074510	32499300	46136800	6203000	19774800
Q9NTJ3	Structural maintenance of chromosomes protein 4	8	4	3	6	4	6	5	5	2	6	5	4	12569330	3906430	3183400	6449950	8295320	5183300	6874880	1615740	8560820	5410270	2354500	8278250
P27816	Microtubule-associated protein 4	16	16	15	15	17	19	17	14	15	14	18	13	41851760	22506050	25333700	44926850	51663190	20562630	34862670	12076990	31676810	34083530	22151190	31814530
P07339	Cathepsin D;Cathepsin D light chain;Cathepsin D heavy chain	1	0	0	0	0	1	14	0	0	0	0	0	235450	0	0	1081600	0	0	0	0	0	73429550	0	0
P04259;CON__P02538;P02538;CON__P48668;P48668;CON__P04259	Keratin, type II cytoskeletal 6B;Keratin, type II cytoskeletal 6A;Keratin, type II cytoskeletal 6C	2	1	1	0	0	2	22	0	0	1	0	0	2615750	420760	2426300	1832310	0	0	0	0	487360	540329300	0	0
Q32MZ4	Leucine-rich repeat flightless-interacting protein 1	7	6	3	4	6	7	7	7	6	5	7	2	20320700	7244470	4674000	13056500	18016800	6352100	13843900	1215080	10710900	12281350	8202340	13046400
P07437	Tubulin beta chain	8	9	7	11	10	9	8	9	10	10	9	7	264036500	65958500	47052000	220686200	256269600	87303360	174057490	43859910	196831130	140962400	77751960	131291300
P08238;P07900	Heat shock protein HSP 90-beta;Heat shock protein HSP 90-alpha	6	3	5	3	5	6	6	6	5	5	5	4	121304800	10795460	26726900	89679400	60635800	33998100	42088100	12144900	76593200	68266900	35905100	34277200
Q15942	Zyxin	6	2	7	5	6	9	6	3	8	5	6	6	24794100	2369800	15314920	32475500	14037400	4872310	9810750	9149350	12912900	12169660	15601690	4342900
P07900	Heat shock protein HSP 90-alpha	42	28	36	39	34	42	36	37	33	40	35	35	442334100	80705220	171030990	386644790	317249100	163031420	191020050	98717710	314030750	300004760	164296250	170769900
P68104;Q5VTE0;Q05639	Elongation factor 1-alpha 1;Putative elongation factor 1-alpha-like 3;Elongation factor 1-alpha 2	19	15	15	16	18	18	17	17	15	18	19	14	355875100	144952250	120673820	394050200	306286400	146118990	288141080	53505400	189382910	249826300	212726600	236782130
P35813	Protein phosphatase 1A	27	17	25	24	19	27	25	16	26	24	21	21	288717700	41598140	125881870	225178670	119331200	90041800	98409290	56891760	187656100	152469000	124404100	70468840
P23246	Splicing factor, proline- and glutamine-rich	16	9	11	10	13	13	11	10	12	11	10	8	72603310	17327560	25623750	45892900	40696230	15881610	27127400	12876630	33860700	35082200	26907680	22643300
Q86V81	THO complex subunit 4	8	5	0	4	4	1	1	5	0	6	3	1	24324200	7201140	0	1692800	15002700	4478660	12006500	579410	17374300	888740	0	13823400
P12532	Creatine kinase U-type, mitochondrial	5	3	5	2	2	4	5	1	5	4	4	4	13032640	3412710	5460710	16818200	6306200	2174130	6734360	6147120	12127800	20426600	6162530	1514600
P00441	Superoxide dismutase [Cu-Zn]	2	2	3	2	3	5	5	4	4	0	3	5	5379000	2147510	6627810	15163920	11262500	2925430	2870310	6345940	0	17049820	7362980	6321100
P61978	Heterogeneous nuclear ribonucleoprotein K	28	19	33	24	24	32	30	28	29	28	31	27	308865300	42059570	161083500	373412600	153757000	71711620	191387210	94212080	258343900	230355200	149893300	166957510
P27708	CAD protein;Glutamine-dependent carbamoyl-phosphate synthase;Aspartate carbamoyltransferase;Dihydroorotase	19	20	11	18	18	17	13	20	15	18	16	14	63219100	32343100	19705300	38196600	81301400	25842940	43747220	14085090	45788800	39786900	26448380	56428640
P47929	Galectin-7	0	0	0	0	0	1	8	0	0	0	0	0	0	0	0	749410	0	0	0	0	0	59065600	0	0
P49327	Fatty acid synthase;[Acyl-carrier-protein] S-acetyltransferase;[Acyl-carrier-protein] S-malonyltransferase;3-oxoacyl-[acyl-carrier-protein] synthase;3-oxoacyl-[acyl-carrier-protein] reductase;3-hydroxyacyl-[acyl-carrier-protein] dehydratase;Enoyl-[acyl-carrier-protein] reductase;Oleoyl-[acyl-carrier-protein] hydrolase	68	48	43	66	59	68	61	65	51	65	57	36	316151230	83160040	86794350	256787050	317617420	141683570	163183170	49008830	293717730	233305040	125668080	206922980
Q9UNM6	26S proteasome non-ATPase regulatory subunit 13	10	5	6	7	11	9	9	8	6	7	10	6	40167800	17771720	14963260	40565600	63754300	20131900	33929700	11346790	27859100	26160440	16978250	31829900
P07858	Cathepsin B;Cathepsin B light chain;Cathepsin B heavy chain	1	0	0	0	1	0	7	0	0	1	2	0	11054000	0	0	0	1541500	0	1315140	0	7597800	58067300	0	0
P14618	Pyruvate kinase PKM	18	9	14	15	14	18	17	13	10	13	15	9	69816800	19976110	33595290	70353370	59913830	28920020	40007120	9994780	40132970	77556930	30722530	40684860
		5.49189	4.21351	3.87635	4.83649	5.22973	5.10135	5.08311	5.1	4.18176	5.10743	5.12973	3.62905	71500000	26700000	32200000	74000000	94500000	41500000	76500000	23500000	81200000	75200000	41900000	65200000
Q5T749	Keratinocyte proline-rich protein	0	0	1	0	1	0	6	0	0	0	0	1	0	0	430070	0	876780	0	0	340790	0	23167590	0	0
P07355	Annexin A2	0	0	2	0	0	1	6	0	0	0	0	1	0	0	1319110	566040	0	0	0	485060	0	32385200	0	0
P07237	Protein disulfide-isomerase	4	0	3	4	2	7	4	3	1	3	1	2	7956200	0	4767240	12767300	4048900	3406220	565180	1853590	5385050	7514780	974160	4413000
P62937	Peptidyl-prolyl cis-trans isomerase A;Peptidyl-prolyl cis-trans isomerase A, N-terminally processed	10	11	12	9	14	12	11	15	11	13	13	14	71852400	53228730	51553120	116723100	190930600	29320030	121815560	52293560	65948860	81684900	64477500	131473800
P04350;P68371;P07437;Q13885;Q9BVA1	Tubulin beta-4A chain;Tubulin beta-4B chain;Tubulin beta chain;Tubulin beta-2A chain;Tubulin beta-2B chain	8	4	5	7	13	10	9	11	6	9	10	3	182036020	39738090	43419020	167895200	266353700	53040370	146207000	20199300	141800170	108606800	60243000	132012970
O00487	26S proteasome non-ATPase regulatory subunit 14	3	2	0	4	4	7	5	3	5	5	5	1	4724000	1576030	0	21655400	13845500	3657960	16238500	767650	12954300	10297400	7307880	7601500
Q5W0B1	RING finger protein 219	6	2	6	7	7	7	5	6	8	7	5	3	22668600	2555590	9356050	16552000	17124200	7195340	8524240	3010870	14788310	10381300	13772360	9873200
P49721	Proteasome subunit beta type-2	4	3	2	4	6	5	5	5	3	5	4	2	9386560	3263300	5154050	14021700	17326800	5730740	7369900	1634640	10639400	10954270	3032710	9263440
Q5JUX0	Spindlin-3	12	4	5	7	7	8	8	9	7	9	8	5	60309200	5579600	8762500	18853800	27049100	7107960	19141760	4343650	23621400	15163410	11608010	20505900
P61254;Q9UNX3	60S ribosomal protein L26;60S ribosomal protein L26-like 1	5	4	2	3	6	5	4	5	3	5	5	3	33980200	10856400	2063500	13597690	41002000	5084000	15306150	6456820	24003000	15578400	5086960	28406500
P47756	F-actin-capping protein subunit beta	5	6	5	4	7	6	5	6	4	6	4	4	20680800	9130830	8768060	17884000	35729900	6864300	11998200	6717200	13422610	14937400	9970200	20507610
P84098	60S ribosomal protein L19	5	6	5	4	4	5	5	6	4	5	4	5	22810000	17947300	8910870	13537500	18509600	9838800	14328300	5426390	17591800	14239240	7668100	25959000
Q13642	Four and a half LIM domains protein 1	12	8	6	7	9	9	8	8	7	10	13	5	37910900	8731150	9126200	18515360	40379600	9321850	34564440	4794510	23420770	16697790	11284320	20760700
Q99733	Nucleosome assembly protein 1-like 4	3	0	0	1	3	3	2	1	2	3	2	1	7038000	0	0	4952960	7729200	554590	1465790	442790	4918210	1729820	1332460	2204500
Q8ND83	SLAIN motif-containing protein 1	0	1	1	2	1	2	0	2	1	1	2	1	0	246530	477470	1976290	2201900	1365820	1039340	390410	1663300	0	393940	1120570
Q96AE4	Far upstream element-binding protein 1	0	0	2	1	0	0	0	1	2	1	0	2	0	0	2397800	0	0	332700	0	1353160	1096400	0	2270200	519740
O00193	Small acidic protein	2	1	1	2	1	3	1	2	1	3	2	1	3753600	1395800	2433600	7339300	4382700	2826200	2441600	792020	4922500	1119700	1066100	4283300
P47813;O14602	Eukaryotic translation initiation factor 1A, X-chromosomal;Eukaryotic translation initiation factor 1A, Y-chromosomal	1	1	2	2	1	3	1	2	1	2	1	2	4235000	1136100	5202200	10272080	5150300	3647000	2685700	3933500	5182200	2256500	3194500	6118800
P51991	Heterogeneous nuclear ribonucleoprotein A3	2	2	1	0	1	2	2	2	1	0	1	2	5937400	1319670	548410	3037400	2670700	0	1503000	1250060	0	4183300	916930	5484800
Q9Y6D9	Mitotic spindle assembly checkpoint protein MAD1	2	1	1	0	1	0	2	0	1	0	1	1	3772430	786290	1137900	0	2634700	0	233690	835270	0	2489800	1123700	0
O43390	Heterogeneous nuclear ribonucleoprotein R	2	2	0	0	3	1	1	1	0	1	2	0	3606900	1815900	0	989900	4560250	0	3312700	0	1423300	1187900	0	1074400
P46783	40S ribosomal protein S10	4	2	1	2	2	3	3	1	1	2	2	1	10294200	2205580	1392000	14327500	4569800	2732610	3433700	731770	3936100	5128850	628480	1269800
Q05048	Cleavage stimulation factor subunit 1	1	1	2	0	1	2	1	0	0	1	1	0	2196700	421950	2206090	1903100	2595100	0	601450	0	1156900	471820	0	0
P52292	Importin subunit alpha-1	6	2	1	6	7	6	8	5	2	7	5	3	11941400	932810	859620	8345830	15537600	5700750	6176270	1212480	12703500	10618300	1701550	6029030
O60884	DnaJ homolog subfamily A member 2	1	1	1	2	4	3	3	3	1	3	4	1	2432700	457970	1317600	9841400	17131900	4950200	11465700	1009700	11073200	10114600	1962000	10569400
Q9Y2H8	Zinc finger protein 510	0	0	0	1	1	0	0	2	2	1	2	1	0	0	0	0	9579200	1966200	11967650	3908800	4503100	0	6052400	18230600
P05141;P12236	ADP/ATP translocase 2;ADP/ATP translocase 2, N-terminally processed;ADP/ATP translocase 3;ADP/ATP translocase 3, N-terminally processed	1	2	0	3	3	2	2	4	0	3	3	0	1746600	826180	0	1747350	7766000	3247340	4164920	0	4800600	2435910	0	8453400
P62258	14-3-3 protein epsilon	11	8	15	11	16	16	14	13	10	13	15	10	97164000	35510210	54526070	114283990	145387410	53066150	94508290	30172120	104685230	100260500	52731960	85491050
P49411	Elongation factor Tu, mitochondrial	25	16	17	23	24	19	25	23	12	25	20	16	332846200	62299070	56777040	101521160	216666600	108007560	139312180	36833940	188704910	199350080	45582600	132829080
O60763	General vesicular transport factor p115	6	2	3	5	3	5	4	4	3	5	4	3	20782000	1966460	4958400	10844070	6509850	11166200	6443100	2074090	12962390	8406300	3405710	5118260
P62136;P36873;P62140	Serine/threonine-protein phosphatase PP1-alpha catalytic subunit;Serine/threonine-protein phosphatase PP1-gamma catalytic subunit;Serine/threonine-protein phosphatase PP1-beta catalytic subunit	2	1	1	0	0	2	1	2	1	1	1	1	2212990	225380	636320	2854900	0	0	699620	439390	907960	2176700	1083200	1617160
Q92599	Septin-8	3	2	2	2	4	3	3	3	1	3	3	1	7405500	2562400	2537910	4656800	11817300	3547240	4927700	641800	5917900	5194500	1758800	4964540
Q9HAV7	GrpE protein homolog 1, mitochondrial	2	0	0	1	2	1	2	0	0	1	0	1	5806600	0	0	2442500	3264400	972220	0	527130	1805500	6115400	0	0
Q9UNE7	E3 ubiquitin-protein ligase CHIP	7	4	5	5	6	10	7	5	3	8	8	3	14480330	2333390	6991240	22894990	15714110	4467650	12368570	4494510	11179440	11239630	3632560	5490770
P34897	Serine hydroxymethyltransferase, mitochondrial	2	2	2	0	1	1	2	0	2	1	1	1	6257500	1732470	7394700	5466100	8509000	0	2476300	672740	1838300	4211400	5129200	0
O43776	Asparagine--tRNA ligase, cytoplasmic	6	4	1	4	3	2	3	4	0	5	4	0	14626300	3875390	1471700	3757900	6368200	4150290	5759040	0	12623200	6862000	0	6759130
P60891;P11908	Ribose-phosphate pyrophosphokinase 1;Ribose-phosphate pyrophosphokinase 2	14	4	11	11	12	12	12	11	10	13	12	11	337397600	7323100	47973090	196265500	240155900	52366670	169039800	42916240	237794900	195733600	53540900	109713400
O43719	HIV Tat-specific factor 1	12	10	10	13	11	12	11	12	11	11	12	9	86829400	24528860	33418700	54197800	79597000	28552200	62957920	14744240	46755800	60545500	40712000	64793000
P60709;P63261	Actin, cytoplasmic 1;Actin, cytoplasmic 1, N-terminally processed;Actin, cytoplasmic 2;Actin, cytoplasmic 2, N-terminally processed	14	9	11	12	12	14	14	10	10	13	14	8	183596000	26739190	66062400	242237000	167557700	31210100	126202800	35219870	169620500	165189900	65085500	85768300
P67870	Casein kinase II subunit beta	8	6	4	5	4	7	4	5	5	5	4	4	36705900	9783950	8579750	23458020	22285300	9423900	12267790	4859740	19942700	16929800	13322280	16558800
P31948	Stress-induced-phosphoprotein 1	16	4	14	12	8	22	13	8	17	16	11	15	61644400	4095360	36325630	91368070	29056200	18392390	26825000	31006730	53414540	42168320	42855590	17626000
P35520	Cystathionine beta-synthase	6	8	4	7	10	8	8	10	3	8	7	4	19065100	15284070	4084990	14498800	37133200	13929000	13194960	1795990	16058200	17642100	2675680	32483800
O00232	26S proteasome non-ATPase regulatory subunit 12	9	8	5	7	7	10	7	8	5	9	6	7	31122200	11902920	8140370	32891800	18199900	10427320	14173000	6176530	20272570	15060610	6898700	18869130
Q92620	Pre-mRNA-splicing factor ATP-dependent RNA helicase PRP16	27	11	14	20	15	17	21	15	12	22	16	11	147608200	22954310	26850460	41481260	63277700	51503110	43460550	12207110	90648300	79337080	19607480	36744350
P31153	S-adenosylmethionine synthase isoform type-2	10	5	7	11	4	12	10	6	6	11	5	8	39017200	4428480	12341900	37745000	8181800	19517000	10677400	10008490	40562900	31656280	11144940	10468000
Q15008	26S proteasome non-ATPase regulatory subunit 6	9	5	2	5	5	8	7	4	2	6	5	3	33678100	10362060	3432800	19275240	38463800	11242080	15442620	5445300	21500200	22280020	8071600	14408700
Q99613;B5ME19	Eukaryotic translation initiation factor 3 subunit C;Eukaryotic translation initiation factor 3 subunit C-like protein	41	34	30	34	39	35	40	40	33	35	39	24	227393630	79258230	56079190	126265600	229203000	70090303	126858748	36659430	132897720	135284750	79285480	148314210
P46821	Microtubule-associated protein 1B;MAP1B heavy chain;MAP1 light chain LC1	14	14	7	12	16	6	7	13	9	14	11	6	40571460	19779710	8802070	10091520	53069000	14966980	23345300	2979110	22386900	12187900	13467410	28987200
Q9Y6Y0	Influenza virus NS1A-binding protein	58	33	45	45	60	51	48	53	49	59	53	37	1445743400	122457600	396098640	820434000	1718127000	339464690	826519160	213917880	1225498610	779828730	578439760	606299750
P30041	Peroxiredoxin-6	12	8	9	9	14	12	14	15	10	12	13	5	111959530	22648700	35671760	46202870	85140300	27074540	74789500	10238950	82789600	94375100	35896450	68784270
P30048	Thioredoxin-dependent peroxide reductase, mitochondrial	3	1	5	2	5	10	4	4	5	2	3	5	5522500	623670	6919700	31308100	13386000	759890	5945000	6429550	2187000	6169740	7901830	5773900
P07814	Bifunctional glutamate/proline--tRNA ligase;Glutamate--tRNA ligase;Proline--tRNA ligase	18	21	8	14	24	17	15	24	13	12	20	10	44883650	28080420	9865630	31117330	78030810	16408470	38233170	8400480	21993700	28672980	15762910	50000870
P0DMV9;P0DMV8	Heat shock 70 kDa protein 1B;Heat shock 70 kDa protein 1A	51	42	44	45	56	51	46	56	47	49	50	43	391723280	114203920	145669970	411486460	634525260	160772170	393385890	112694980	377037930	290492820	224953900	393068920
P11908	Ribose-phosphate pyrophosphokinase 2	13	1	8	9	11	7	12	9	9	11	9	6	144414800	1927100	18420630	37219100	79135900	21383780	50326100	14583400	102308900	75458400	24609160	37084320
P28066	Proteasome subunit alpha type-5	4	5	2	4	7	7	6	5	4	7	5	6	25134800	16527250	12472820	36279700	57818900	13530620	28551700	12231000	41460400	35308500	29005900	42013100
P31947	14-3-3 protein sigma	1	1	1	1	1	1	5	0	1	1	1	0	13471000	7798700	6565000	16552000	22874000	11602000	14842000	0	15549000	38583800	6852700	0
P13674	Prolyl 4-hydroxylase subunit alpha-1	3	0	0	0	4	4	2	1	2	2	2	2	6789700	0	0	3722350	6551800	0	1609050	765080	3801500	2332400	1365720	1952800
Q06830	Peroxiredoxin-1	22	18	14	18	25	17	20	25	9	20	24	6	238721300	100995840	43999760	106548910	539651100	86911590	289426790	18392170	156607440	177561100	34675420	292611430
P38646	Stress-70 protein, mitochondrial	38	31	33	37	31	36	34	33	34	35	35	30	316842190	95149530	168262390	305672450	360978800	137380660	220637210	103723320	256009790	230344240	212376740	200758380
P14678;P63162	Small nuclear ribonucleoprotein-associated proteins B and B;Small nuclear ribonucleoprotein-associated protein N	17	15	15	14	18	16	15	14	16	18	16	14	468616900	94548400	172909900	273923800	499085100	84294630	253000750	74104000	350608000	166925210	174302800	191647300
Q9GZS3	WD repeat-containing protein 61;WD repeat-containing protein 61, N-terminally processed	4	3	1	0	4	4	2	2	1	3	4	1	7751960	2618000	889980	4653100	13483100	0	6602400	827580	6045100	2498000	1161800	5841200
CON__P13645;P13645;CON__P02535-1	Keratin, type I cytoskeletal 10	2	5	6	2	2	1	6	2	0	0	6	4	3942100	25252600	17133670	1980400	3399760	1589690	20680800	4847180	0	85846100	0	2415030
Q7L0Y3	Mitochondrial ribonuclease P protein 1	30	16	3	22	13	5	19	15	3	21	16	3	252573300	40728500	141859680	6216040	64146700	59856420	55474840	2644780	105691600	93088200	6489500	70144100
P15924	Desmoplakin	9	1	4	4	5	6	22	3	3	4	7	5	10351810	503850	2683790	3746220	3915280	1522950	5201790	2036130	2562680	75143840	1445350	1755390
CON__P13645;P13645	Keratin, type I cytoskeletal 10	4	14	17	3	6	4	28	1	2	0	18	7	12533800	65973050	95927110	7297060	9499890	2020250	120624970	11562670	0	1337660440	1551700	2712500
P35579	Myosin-9	38	56	39	34	51	46	50	55	38	40	40	41	101325570	90653500	73368550	128068470	230213100	46886940	95997000	45043560	85896000	162928350	73906760	133726930
P25786	Proteasome subunit alpha type-1	10	7	7	8	13	10	10	12	6	14	11	6	32911210	18454620	19195800	31544470	91138650	9313790	28626870	10503920	48604860	35222550	13253470	35716670
Q9BT78	COP9 signalosome complex subunit 4	4	0	0	1	4	4	3	3	0	3	2	1	7413100	0	0	6778790	10325800	1183900	2183990	457350	3935210	7337600	0	3159620
Q70IA6	MOB kinase activator 2	14	8	12	12	8	10	10	12	11	10	9	9	149073200	32930430	59366940	63164720	79766600	43919570	67883800	22279980	63428880	81049100	44856140	88375360
O43707	Alpha-actinin-4	19	9	12	10	13	17	14	11	9	13	9	7	71187900	9025580	19981320	35563660	41453000	12331130	12271550	7186860	24714140	32274090	17362200	22417650
P98175	RNA-binding protein 10	110	94	112	95	96	104	94	99	104	95	99	91	3627104570	1317787940	2401227310	2763626840	1877161210	1153515570	1627444740	1031560540	2025984450	1718819180	2017628300	1954231100
P25789	Proteasome subunit alpha type-4	10	3	1	9	6	6	9	7	3	10	5	3	42252000	2697810	978740	13204300	27564780	20607080	19396000	1649480	42114200	38772600	3539490	30131160
P68363;P68366	Tubulin alpha-1B chain;Tubulin alpha-4A chain	5	4	3	3	5	5	6	5	4	6	6	5	48671200	9352820	15709200	71731900	93363100	19675900	87990700	10803500	77287700	56225300	30567900	73634700
P27824	Calnexin	7	5	4	6	7	9	8	7	3	7	8	5	29142580	10013880	6040160	28423890	40362600	16158800	22074300	5112270	36497500	36928880	9021500	22968680
P48556	26S proteasome non-ATPase regulatory subunit 8	2	1	0	2	2	3	2	3	0	2	2	1	10033900	3829800	0	7667550	11492300	2468950	5224460	3112500	9371300	7105350	0	8578090
Q9HB71	Calcyclin-binding protein	2	1	2	1	1	4	1	2	1	2	3	3	3279700	749090	22438360	8942500	818070	923830	21440000	15013800	2341570	2214000	2114500	9747124
Q13283	Ras GTPase-activating protein-binding protein 1	4	3	3	3	3	3	3	4	0	4	5	1	19510300	5551100	5619670	9079300	13026900	6216200	19431900	1892000	14177100	9751300	0	26119400
Q99714	3-hydroxyacyl-CoA dehydrogenase type-2	19	14	5	17	16	12	17	17	9	17	16	8	298013600	45341820	5343170	31349770	129484600	84695860	97242900	7700370	178378600	151875900	12508940	132763800
P31689	DnaJ homolog subfamily A member 1	10	6	5	8	9	10	9	9	7	8	11	5	25547850	5292420	3616280	18595550	20607320	9821180	17332590	3770730	14949860	14584310	7169350	15916570
P06748	Nucleophosmin	13	10	10	11	12	8	14	12	7	14	14	8	67769200	19905490	26552160	31225500	62583670	25870300	53163090	9834540	83764150	111303140	17623380	57784900
P48643	T-complex protein 1 subunit epsilon	68	48	67	60	65	79	64	65	68	62	58	58	808203300	212496320	510725440	1190448700	866281150	258096820	456261650	285701907	622080110	599191680	708756050	525706460
P11142;P54652	Heat shock cognate 71 kDa protein;Heat shock-related 70 kDa protein 2	8	8	8	9	9	8	10	8	9	8	9	9	306775800	68751600	89892500	249657600	333664800	134657420	215662200	81356610	271398200	246272590	184673430	174721600
P68363;Q9BQE3;Q71U36;Q13748;Q6PEY2	Tubulin alpha-1B chain;Tubulin alpha-1C chain;Tubulin alpha-1A chain;Tubulin alpha-3C/D chain;Tubulin alpha-3E chain	8	6	8	7	9	7	8	8	6	7	8	7	91566800	26738200	35311980	142384300	170676700	59603800	99050000	28530400	83668100	69788600	38344600	85401200
Q9H2G2	STE20-like serine/threonine-protein kinase	1	0	0	3	1	2	2	2	1	2	2	0	1800300	0	0	1875960	799820	1708610	866560	0	1836260	1937980	238180	883390
P30101	Protein disulfide-isomerase A3	2	0	3	1	0	6	3	2	4	2	3	3	1488590	0	3337630	6658360	0	74679	2799590	2586000	1765480	5688510	4891250	2948800
Q15274	Nicotinate-nucleotide pyrophosphorylase [carboxylating]	5	4	0	6	6	0	5	7	1	6	7	0	18364200	13255660	0	0	40711960	13744630	28395450	0	35271200	24988010	1208100	36838560
P61981;Q04917;P31946;P27348;P31947;P62258;P63104	14-3-3 protein gamma;14-3-3 protein gamma, N-terminally processed;14-3-3 protein eta;14-3-3 protein beta/alpha;14-3-3 protein beta/alpha, N-terminally processed;14-3-3 protein theta;14-3-3 protein sigma;14-3-3 protein epsilon;14-3-3 protein zeta/delta	3	1	3	4	3	2	3	4	3	3	3	3	23178700	1341500	9912790	5435800	20720400	14639410	17741200	5422330	16107500	14751100	7413890	14787040
Q14C86	GTPase-activating protein and VPS9 domain-containing protein 1	1	1	1	1	1	2	2	2	1	1	1	1	4600600	1412500	1969200	5381300	2300200	1865900	1632100	1431900	1558700	4214860	1305600	3642990
Q9H6T3	RNA polymerase II-associated protein 3	1	0	0	0	1	1	1	2	0	2	1	0	2773600	0	0	1685000	3313600	0	1510700	0	3214000	1887800	0	3003400
O75396	Vesicle-trafficking protein SEC22b	0	0	0	0	0	1	1	1	0	0	2	0	0	0	0	495370	0	0	2006090	0	0	1411400	0	974120
O75940	Survival of motor neuron-related-splicing factor 30	0	0	0	0	1	0	1	0	1	0	0	0	0	0	0	0	1746500	0	0	0	0	1133300	1079000	0
Q00610	Clathrin heavy chain 1	0	0	0	1	1	1	0	2	0	0	2	0	0	0	0	826910	1595300	221220	2004860	0	0	0	0	2179800
P62826	GTP-binding nuclear protein Ran	2	2	3	3	3	4	4	2	3	3	3	2	8902900	7049900	11598200	26046500	24726500	8030500	21305300	4120300	10136950	18060400	10054400	5178300
P09661	U2 small nuclear ribonucleoprotein A	1	1	0	2	1	1	1	2	0	1	2	1	1101000	651910	0	967750	1312400	660970	2583500	392360	1257600	1545100	0	2359650
P04075;P09972	Fructose-bisphosphate aldolase A;Fructose-bisphosphate aldolase C	0	0	0	0	1	1	1	0	0	1	1	0	0	0	0	4207000	2905000	0	3184100	0	2682700	3823500	0	0
P08238;P07900;Q14568	Heat shock protein HSP 90-beta;Heat shock protein HSP 90-alpha;Heat shock protein HSP 90-alpha A2	0	0	1	0	0	1	1	1	0	0	0	0	0	0	759170	2584600	0	0	0	0	0	1580900	0	885450
P13995	Bifunctional methylenetetrahydrofolate dehydrogenase/cyclohydrolase, mitochondrial;NAD-dependent methylenetetrahydrofolate dehydrogenase;Methenyltetrahydrofolate cyclohydrolase	1	0	0	1	0	0	0	1	1	1	0	0	535310	0	0	0	0	663920	0	0	1225300	0	332580	980900
P63167	Dynein light chain 1, cytoplasmic	1	0	0	1	0	2	0	1	1	0	0	1	1739700	0	0	3279720	0	1247100	0	398590	0	0	497010	1266200
P0DMV9;P0DMV8;P17066;P48741;P34931	Heat shock 70 kDa protein 1B;Heat shock 70 kDa protein 1A;Heat shock 70 kDa protein 6;Putative heat shock 70 kDa protein 7;Heat shock 70 kDa protein 1-like	2	0	1	1	2	2	2	1	1	2	2	1	18232700	0	4558600	16177900	16759700	13366000	11319100	3396300	10576800	15680900	4873300	12079000
P68133;P68032;P63267;P62736;P60709;P63261;Q562R1	Actin, alpha skeletal muscle;Actin, alpha cardiac muscle 1;Actin, gamma-enteric smooth muscle;Actin, aortic smooth muscle;Actin, cytoplasmic 1;Actin, cytoplasmic 1, N-terminally processed;Actin, cytoplasmic 2;Actin, cytoplasmic 2, N-terminally processed;Beta-actin-like protein 2	2	1	2	2	3	2	3	2	1	2	2	3	12792900	2576300	20813700	25247700	38942900	5705260	14356600	14604290	19073600	37642100	8523600	8588000
Q9H773	dCTP pyrophosphatase 1	1	1	1	0	1	2	1	2	1	2	0	2	1688400	807160	762850	3866800	2311200	0	0	1292440	1769830	1647200	1788800	2254720
P62280	40S ribosomal protein S11	3	3	1	4	4	1	3	3	2	3	3	2	20335500	12027400	3269100	4945200	39932500	13097670	17472800	3055200	17089800	21698700	5244800	22776600
O00148;Q13838	ATP-dependent RNA helicase DDX39A;Spliceosome RNA helicase DDX39B	0	1	2	1	1	0	2	0	1	1	1	1	0	1209400	1677040	0	2700300	1206800	2375600	476960	2639300	4004000	1433900	0
O43684	Mitotic checkpoint protein BUB3	1	1	1	2	1	1	1	2	0	1	2	1	1452300	477780	812060	1606100	595780	1089410	3092700	142330	1556100	949820	0	1809950
P22392;O60361;P15531	Nucleoside diphosphate kinase B;Putative nucleoside diphosphate kinase;Nucleoside diphosphate kinase A	2	1	1	1	2	2	2	1	1	1	2	1	4472800	675640	2829400	6274400	8007500	1043800	4185800	715970	1641200	5591500	932070	1181800
P35908;CON__P35908;P04259;CON__P02538;P02538;CON__O95678;O95678;CON__Q8VED5;CON__P48668;P48668;CON__P13647;P13647;CON__Q5XKE5;Q5XKE5;CON__P04259	Keratin, type II cytoskeletal 2 epidermal;Keratin, type II cytoskeletal 6B;Keratin, type II cytoskeletal 6A;Keratin, type II cytoskeletal 75;Keratin, type II cytoskeletal 6C;Keratin, type II cytoskeletal 5;Keratin, type II cytoskeletal 79	1	1	1	1	0	1	2	1	0	0	1	1	2684700	2716200	9392700	1356400	0	1265700	30802000	4288200	0	104877000	0	3323400
P56192	Methionine--tRNA ligase, cytoplasmic	2	1	0	2	1	1	1	2	0	1	1	0	3237300	1044000	0	989840	1615100	1322610	1126500	0	1582700	1196600	0	4476600
P61758	Prefoldin subunit 3	2	2	2	1	4	3	3	2	1	4	2	2	3281800	1025850	1770940	3114000	6568310	422140	5196790	615560	6649570	2463710	602020	2111860
P61962	DDB1- and CUL4-associated factor 7	2	1	0	1	0	1	2	1	0	1	2	0	4123300	996400	0	689420	0	551850	4529400	0	3494200	4941900	0	1459600
Q9BQ67	Glutamate-rich WD repeat-containing protein 1	1	1	0	0	2	1	1	1	0	1	0	0	3347900	599360	0	306470	3970700	0	0	0	1297400	739450	0	1561400
Q9NQ92	Coordinator of PRMT5 and differentiation stimulator	4	2	2	4	3	2	3	2	3	3	3	2	85437800	43113000	29635000	26882000	86800800	62145660	53246160	12185600	68948000	62018700	11920580	54148000
P14854	Cytochrome c oxidase subunit 6B1	1	0	1	1	0	1	0	1	0	1	1	0	1736700	0	797810	1291500	0	1046700	693040	0	1277900	0	0	1900800
P54819	Adenylate kinase 2, mitochondrial;Adenylate kinase 2, mitochondrial, N-terminally processed	1	0	1	0	1	1	1	0	0	1	1	1	1364600	0	1516400	2764700	2453400	0	1547700	1094300	1841600	1993400	0	0
P12814	Alpha-actinin-1	6	1	3	3	2	3	4	3	2	4	4	2	11737050	543330	2801930	5234800	3696300	2710580	3247270	810070	6784500	9312700	2168000	2543990
P14618;P30613	Pyruvate kinase PKM;Pyruvate kinase PKLR	2	1	2	2	1	2	1	2	1	0	2	1	6010800	1077200	2463800	2907880	2323500	1986250	5603700	292900	0	3385300	699290	3576100
P78527	DNA-dependent protein kinase catalytic subunit	3	4	0	2	3	2	3	2	1	3	2	0	4572620	4900100	0	3194100	7021500	1514730	3087790	0	5224600	4492030	597910	3139000
CON__P13645;P13645;CON__Q148H6;CON__Q7Z3Y7;Q7Z3Y7;CON__Q7Z3Z0;CON__Q7Z3Y8;Q7Z3Z0;Q7Z3Y8	Keratin, type I cytoskeletal 10;Keratin, type I cytoskeletal 28;Keratin, type I cytoskeletal 25;Keratin, type I cytoskeletal 27	1	1	1	0	1	1	1	0	0	0	1	1	2335800	6740500	4965300	499400	2679000	0	8898700	1728900	0	53014000	0	0
P82921	28S ribosomal protein S21, mitochondrial	3	2	2	1	2	1	2	1	2	1	2	2	6095200	2319300	2177140	1401700	4944000	878420	2847600	933610	1008900	2429800	1714210	1529600
Q7Z4H8	KDEL motif-containing protein 2	5	1	0	3	1	1	2	2	0	2	1	1	12298500	428520	0	871580	1051400	2021570	1169900	234720	3510600	2474900	0	2647180
Q92552	28S ribosomal protein S27, mitochondrial	1	1	1	0	1	1	1	0	0	0	1	0	3179500	928570	1418300	2443500	2382900	0	2840500	0	0	2061300	0	0
Q9HA64	Ketosamine-3-kinase	3	3	1	2	3	1	1	2	2	2	3	1	3944880	1778070	550370	1819600	5386310	825240	3518190	969620	2359900	492380	2142760	2180500
Q9UPN9	E3 ubiquitin-protein ligase TRIM33	1	1	1	1	0	1	0	1	0	0	1	1	2512300	1533100	1359000	1042200	0	651790	1072600	589090	0	0	0	1848900
Q86YP4	Transcriptional repressor p66-alpha	4	4	1	4	2	1	3	3	0	2	3	0	8635400	4002780	589030	683890	4450400	2309510	3000140	0	1588670	3272090	0	5344940
Q9UPQ9	Trinucleotide repeat-containing gene 6B protein	13	9	10	8	3	13	9	4	8	6	4	10	28637760	8254920	13350080	23786380	7049200	8145890	4688750	7681340	11431950	10801950	10541250	4890330
P12004	Proliferating cell nuclear antigen	13	9	2	15	11	7	13	13	5	15	13	5	65009380	12707080	1739290	18544200	55143800	34122130	40040260	3171780	49500700	49900030	3879480	38579600
Q9H3K6	BolA-like protein 2	15	12	12	15	14	14	13	16	16	14	13	11	319355200	62093800	129280970	210529600	181675600	123541970	135336900	67960700	187369200	201327800	159614700	192572430
Q96J01	THO complex subunit 3	5	2	9	6	5	8	5	6	7	9	5	8	17389800	2681900	38179100	63498300	16659700	7499110	14095900	22586400	35751700	24184900	35377600	15749320
P51571	Translocon-associated protein subunit delta	3	1	1	3	3	2	2	4	1	2	1	1	8508900	704130	660320	5152600	8353800	3710200	1463600	709440	3238600	5364000	432960	4443240
Q04917	14-3-3 protein eta	5	2	4	3	4	5	4	5	4	4	3	2	17994260	2924590	11127670	23075620	19248000	5643290	14344700	2730050	6590480	17025070	7115480	13318190
P49458	Signal recognition particle 9 kDa protein	2	2	2	2	3	3	3	2	2	2	2	1	11939100	2894680	2206280	11857800	18484300	4786400	8435400	1167600	7310000	11206800	3554120	6561100
Q3V6T2	Girdin	6	4	1	5	5	3	4	4	4	7	6	2	10966220	3091470	982490	3264110	11998680	4140560	5135150	1623860	8332820	5637190	3771440	5194510
Q92905	COP9 signalosome complex subunit 5	3	2	1	3	3	2	2	4	1	4	1	0	4160330	1692170	2304000	3646800	8316490	4620190	1621100	0	7627410	6671800	2760200	3486660
P15311	Ezrin	4	1	3	2	2	3	3	1	4	5	2	1	7410510	223950	3892000	3623470	2254500	2130990	1695380	801280	8675120	4687080	3719650	883960
Q14247	Src substrate cortactin	9	7	8	7	9	10	9	7	8	9	8	6	48525000	12136160	24761100	45143830	23687450	11394260	24828120	11196230	33797620	26846870	20057650	15796010
P40227;Q92526	T-complex protein 1 subunit zeta;T-complex protein 1 subunit zeta-2	6	6	6	4	7	7	5	6	6	6	6	5	32906300	10199910	21037000	53401000	46225400	8076750	14902350	11799500	25608260	19261700	19557300	26456600
P62314	Small nuclear ribonucleoprotein Sm D1	10	7	6	6	7	8	7	8	7	9	10	6	176845100	61671500	71189400	129110100	130834600	37852200	170149640	26299600	92523430	147140200	70013500	179865800
O75400	Pre-mRNA-processing factor 40 homolog A	4	5	4	4	3	3	3	4	4	4	4	5	10532770	6884930	5591450	5981040	7711000	5536500	7867900	4532660	10539100	5441900	5909840	7936260
P42025;P61163	Beta-centractin;Alpha-centractin	3	5	1	1	4	3	2	3	2	2	3	2	26798500	11475000	2570000	11311300	25408500	2959700	14659200	1644510	6311700	7766800	3686600	15830400
Q14839;Q8TDI0;Q12873	Chromodomain-helicase-DNA-binding protein 4;Chromodomain-helicase-DNA-binding protein 5;Chromodomain-helicase-DNA-binding protein 3	6	3	3	4	4	3	3	5	2	4	4	2	21388350	6516220	5218980	3578460	15628900	9107820	3669970	3692440	7571860	7585100	1382920	13285750
P46782	40S ribosomal protein S5;40S ribosomal protein S5, N-terminally processed	6	4	1	2	2	4	1	3	3	3	3	2	18980000	2862960	785410	5977100	6293300	3523800	6859600	1251830	8326900	3433100	2926750	7179300
P0DMV9;P0DMV8;P34931	Heat shock 70 kDa protein 1B;Heat shock 70 kDa protein 1A;Heat shock 70 kDa protein 1-like	11	12	13	12	13	13	13	12	12	13	13	9	222719200	105714320	86367820	231738240	343798650	137058650	247081590	73106770	235813540	219157460	137859690	217984800
P07355;A6NMY6	Annexin A2;Putative annexin A2-like protein	1	1	2	1	0	6	14	1	0	0	3	2	1535600	232370	1757790	6628520	0	454470	2841270	733940	0	84800800	0	923360
Q99615	DnaJ homolog subfamily C member 7	18	11	2	16	9	7	16	14	5	16	12	2	69514200	15791680	2901300	10842080	25522800	28770680	25422690	1242310	62494200	47353900	7754390	37192720
P12268	Inosine-5-monophosphate dehydrogenase 2	18	5	9	15	10	13	13	13	9	13	8	7	76421900	5651680	16590050	30385950	34621000	27167400	21818000	6817490	43470600	42022500	16010790	35277800
P68133;P68032	Actin, alpha skeletal muscle;Actin, alpha cardiac muscle 1	3	0	3	1	4	6	4	2	2	3	5	2	11740670	0	7374700	63721200	19398400	1213600	35508400	2591720	23933400	45289600	9161600	8516800
O14744	Protein arginine N-methyltransferase 5;Protein arginine N-methyltransferase 5, N-terminally processed	81	84	80	81	87	75	79	90	71	82	79	65	11118926900	5708394850	4284583600	4669831500	13659478700	5124294380	9152763700	1606517410	8707111800	8035616200	3460647530	10582372100
Q99873	Protein arginine N-methyltransferase 1	6	4	3	3	5	5	6	6	3	4	5	3	23951750	5430760	5174800	13752400	16406900	5204000	10728500	2506390	10736000	18411200	5573500	14317800
P04181	Ornithine aminotransferase, mitochondrial;Ornithine aminotransferase, hepatic form;Ornithine aminotransferase, renal form	3	0	6	1	1	5	3	0	2	0	1	4	6538700	0	7877080	16897200	1797100	656770	857410	3359500	0	6826300	4773100	0
Q9Y490	Talin-1	11	7	4	3	2	7	4	5	5	4	6	2	20218390	4933070	2635260	8367810	2379770	2877420	3863560	724640	5781250	5290520	3102170	5042910
O95347	Structural maintenance of chromosomes protein 2	9	7	5	5	4	6	4	6	3	4	5	3	14187930	6981940	5101710	7925890	10428900	5451220	8243190	1369770	4032020	3468150	1975540	8760390
Q96DI7	U5 small nuclear ribonucleoprotein 40 kDa protein	4	4	3	3	5	6	6	6	4	6	6	4	12280900	6562960	5806440	20563600	30265300	4479180	15139290	5369300	19594100	17286400	6447940	17822500
P55795	Heterogeneous nuclear ribonucleoprotein H2	6	5	3	5	6	3	8	7	1	7	6	2	18156400	4000970	1789700	5333920	15594500	7777960	12321290	1470720	15571000	16606920	665540	13657220
Q13045	Protein flightless-1 homolog	6	5	3	4	3	6	3	5	3	5	2	3	13250400	5435120	3087540	8594720	6895400	4061230	3414600	2476010	8387000	4524680	3139460	7989680
Q14203	Dynactin subunit 1	23	17	13	15	22	15	19	20	9	18	23	11	68212860	24089020	16390770	24480590	90648910	17562410	44218640	7480670	28844560	42814550	10378390	50757480
Q99460	26S proteasome non-ATPase regulatory subunit 1	15	9	5	6	18	13	11	14	8	10	10	5	38339310	13688420	7456440	33056770	73113200	9845940	27564800	5995220	29173400	25242300	8176860	32801680
O60256	Phosphoribosyl pyrophosphate synthase-associated protein 2	32	7	19	25	29	26	30	26	20	32	30	23	524361100	3883690	56686400	165385600	285158500	75318180	176260420	46974060	332880000	251288520	73825920	127684520
P04406	Glyceraldehyde-3-phosphate dehydrogenase	7	2	7	6	4	12	12	7	7	6	9	8	12333160	1530340	9862360	75835500	8072440	4595800	23591890	8283200	13805900	138150100	15372970	20331150
O60749	Sorting nexin-2	4	4	1	103	103	97	102	107	96	111	108	89	7093220	2777120	994930	6262438990	10218166630	5720643680	9878000500	2139663500	10910019300	7506218170	3611506500	7055121910
O60343	TBC1 domain family member 4	8	3	2	3	3	6	4	4	2	5	5	2	17357250	1419640	3812400	9307430	5868500	2108370	4004180	1216450	6860300	6482100	2312280	6164200
P50991	T-complex protein 1 subunit delta	31	29	32	31	33	42	27	33	44	31	29	34	278014200	125283550	169411040	596209650	421794520	119694560	180367570	128185020	221924000	166664800	322251060	206300420
Q9Y2W1	Thyroid hormone receptor-associated protein 3	22	22	16	16	20	17	16	21	15	16	25	12	129981580	93780220	49964420	69300840	220205100	43413110	153443000	27723720	65247380	50455200	50647180	132956760
P68363;Q9BQE3;Q71U36	Tubulin alpha-1B chain;Tubulin alpha-1C chain;Tubulin alpha-1A chain	10	10	10	10	13	14	12	13	10	13	14	10	319607600	80669990	121878930	349912800	488880800	132442030	367762500	77126830	331591100	326776400	136075200	292956700
CON__P02769		9	13	13	14	10	14	16	10	13	14	12	11	29694800	27737310	28432500	28736150	23836780	21130740	30256320	21556430	28247180	62840380	27649280	22386040
P10599	Thioredoxin	10	10	9	9	13	12	10	13	10	11	14	11	198171500	89638770	144978700	218688670	318800300	71756850	270280300	95256250	135176010	150656800	193393000	249707510
P28070	Proteasome subunit beta type-4	1	3	2	2	4	3	4	3	3	4	4	3	2302100	3654110	2600070	4780110	14380200	2017210	7185850	1227450	7994040	7065300	3406310	6569400
P68363;P68366;Q9BQE3;Q71U36;Q13748	Tubulin alpha-1B chain;Tubulin alpha-4A chain;Tubulin alpha-1C chain;Tubulin alpha-1A chain;Tubulin alpha-3C/D chain	3	3	3	4	3	4	4	5	3	3	4	3	73417000	25080700	32794700	114611550	164702000	48718700	87166900	17161300	80878000	57812100	37018000	78753200
Q9UHX1	Poly(U)-binding-splicing factor PUF60	5	2	1	3	4	5	3	5	3	4	3	2	11294100	973110	1436900	8151170	11626100	3459230	3425600	1832780	5531860	5764040	3191810	7852500
O15371	Eukaryotic translation initiation factor 3 subunit D	25	26	25	25	26	25	23	30	25	23	26	25	279608000	139018520	118700940	189659850	312237800	95807316	199764140	67293150	184761200	188602390	127143990	222350300
P28074	Proteasome subunit beta type-5	7	5	4	7	5	8	7	7	4	7	7	4	24309500	10358130	8522700	31296480	36380700	17727260	24110500	4866530	32723900	28494800	9018080	25212510
P55036	26S proteasome non-ATPase regulatory subunit 4	7	6	5	4	8	7	6	7	7	5	4	5	42684200	17517100	13508600	30306500	48333900	13824600	20680600	8221050	21661400	24503600	23632310	30736800
Q04637	Eukaryotic translation initiation factor 4 gamma 1	10	7	5	9	7	9	9	8	7	11	7	5	41856300	13761530	11961040	29201700	26030100	15042170	17794000	7001110	28341230	25403530	12892220	19560280
Q16204	Coiled-coil domain-containing protein 6	2	1	0	1	0	3	1	2	2	1	2	1	3840900	316610	0	3504720	0	929540	2661700	205660	1106600	1027400	1540630	1766310
O00233	26S proteasome non-ATPase regulatory subunit 9	1	0	1	1	2	2	1	0	3	2	1	2	837040	0	1244500	2479300	4238400	1185700	989430	1684840	2572400	397300	2014790	0
O00571	ATP-dependent RNA helicase DDX3X	3	2	1	2	3	4	2	4	2	3	2	1	12535600	1717130	657140	8627700	7604200	2960170	3798800	362510	6932700	5808200	1441010	8026600
P06753	Tropomyosin alpha-3 chain	2	2	3	2	3	3	4	2	3	3	2	2	8766300	2237700	13725600	22313800	13152600	3797100	4834900	4261600	11910800	24013900	12517000	6359900
Q13885;Q9BVA1	Tubulin beta-2A chain;Tubulin beta-2B chain	3	3	0	2	3	5	2	5	1	2	5	2	22480000	6785960	0	18505190	19520600	1963140	19552300	924430	11833300	8354600	1978500	17491600
Q9Y4E1;Q641Q2	WASH complex subunit FAM21C;WASH complex subunit FAM21A	3	0	3	3	2	5	3	4	1	3	2	1	8185700	0	3413120	4913150	3002400	2033900	1337430	378060	2909800	2870620	634880	4245290
Q12931	Heat shock protein 75 kDa, mitochondrial	2	0	1	1	0	4	2	0	2	2	0	0	2301970	0	1375200	7104800	0	335410	0	0	1556350	3004700	1415490	0
P05455	Lupus La protein	6	3	3	5	5	4	5	6	2	5	4	3	19031320	3292330	3785060	8086820	16193200	10497400	6524770	2292000	12123170	10202600	1694100	11116500
P27635	60S ribosomal protein L10	3	4	2	3	3	4	3	4	2	4	3	2	15988800	8932490	2855200	10265600	21430200	5763600	12968600	2476520	16802100	14214800	5120800	16529090
P46060	Ran GTPase-activating protein 1	1	2	2	2	2	0	1	2	2	2	2	2	990150	1998640	2385600	0	6361800	3429380	4591970	1886890	2833400	2285400	3092500	3697780
O60925	Prefoldin subunit 1	4	2	1	3	2	2	1	2	3	3	3	1	7012400	1520150	1085300	4680500	3433900	3508760	8455200	574480	4594350	2552300	3390350	3826900
P62244	40S ribosomal protein S15a	2	2	1	2	1	2	2	2	0	1	2	0	10588600	2746900	807410	2635000	2461000	2921300	3671100	0	1845200	4311300	0	3149300
Q8IWI9	MAX gene-associated protein	3	2	1	2	2	1	0	2	2	0	2	0	5645360	1092250	913300	1134500	4135000	1149200	1514390	0	0	0	2209500	2124440
P43487	Ran-specific GTPase-activating protein	4	2	2	3	3	4	3	5	3	3	3	3	15492600	2598010	3671030	15139300	17144400	4963200	7063560	2631750	9823300	13658200	4479660	11750440
P68363;P68366;Q9BQE3;Q71U36;Q13748;Q6PEY2	Tubulin alpha-1B chain;Tubulin alpha-4A chain;Tubulin alpha-1C chain;Tubulin alpha-1A chain;Tubulin alpha-3C/D chain;Tubulin alpha-3E chain	7	5	6	5	8	9	6	8	7	8	7	5	63005600	11273050	20728700	118171600	146576700	40755900	95022200	13841920	60248500	54825400	32068860	64320000
P00338	L-lactate dehydrogenase A chain	1	2	1	2	0	6	2	2	2	3	4	3	5178500	753930	1269000	33396200	0	1895890	13543380	3039830	9373000	11774700	3340330	2687440
P09429;B2RPK0	High mobility group protein B1;Putative high mobility group protein B1-like 1	2	2	1	3	2	3	3	3	1	3	3	2	4426100	1482500	2048300	24744600	12941000	12280310	19142000	5035300	14144400	14741100	2762200	11880000
P16152	Carbonyl reductase [NADPH] 1	0	0	0	0	1	2	0	2	0	0	1	0	0	0	0	2839700	1631500	0	758690	0	0	0	0	1833440
Q7Z4H7	HAUS augmin-like complex subunit 6	0	0	0	0	0	1	0	2	0	0	2	1	0	0	0	733430	0	0	3052010	403060	0	0	0	3245250
Q9UBN7	Histone deacetylase 6	1	0	6	1	0	7	0	2	7	2	1	3	906710	0	11658510	27321900	0	626510	154810	1844470	2087800	0	13615290	1661250
Q15019	Septin-2	18	8	12	14	11	11	10	16	13	15	11	8	83964800	18185700	28249830	42813700	61401100	25896970	31944100	9633990	50924640	50996000	28228720	51224120
O15212	Prefoldin subunit 6	0	1	1	1	3	0	1	1	1	1	3	1	0	705740	743100	0	4512100	596290	3750000	460360	1649200	1616000	765230	981260
O95816	BAG family molecular chaperone regulator 2	2	0	0	1	1	0	3	0	0	4	3	1	1643450	0	0	0	1582100	804940	3443170	464720	5269070	3807830	0	0
CON__P08779;P08779;CON__Q9Z2K1;CON__Q3ZAW8;CON__A2A4G1;CON__P35900;CON__Q9D312;P35900;CON__P19012;P19012;CON__P02533;P02533;CON__Q6IFX2;CON__Q61782;CON__Q04695;Q04695	Keratin, type I cytoskeletal 16;Keratin, type I cytoskeletal 20;Keratin, type I cytoskeletal 15;Keratin, type I cytoskeletal 14;Keratin, type I cytoskeletal 17	0	0	1	0	1	0	2	0	0	0	2	0	0	0	291680	0	828540	0	2256750	0	0	22838100	0	0
P0DMV9;P0DMV8;P17066;P34931	Heat shock 70 kDa protein 1B;Heat shock 70 kDa protein 1A;Heat shock 70 kDa protein 6;Heat shock 70 kDa protein 1-like	0	0	0	0	2	0	1	0	0	1	1	0	0	0	0	0	5463300	0	3149400	0	4423400	1777800	0	0
Q16527	Cysteine and glycine-rich protein 2	2	2	3	2	2	3	2	4	2	2	4	3	3564300	1652510	4698070	4795100	5559500	1439850	6435100	2412970	2597300	2411020	2407900	5141800
P10412;P16402;P16403	Histone H1.4;Histone H1.3;Histone H1.2	4	4	3	3	4	4	4	4	2	4	4	4	39167100	30479900	8191800	19471100	66775200	9043800	31530000	10310140	8981650	22715400	12573100	46466200
CON__P08779;P08779;CON__A2A4G1;CON__P13645;P13645;CON__P02533;P02533	Keratin, type I cytoskeletal 16;Keratin, type I cytoskeletal 10;Keratin, type I cytoskeletal 14	2	1	1	0	1	1	2	1	0	0	1	1	7081400	1495700	6940500	1610500	2726900	0	7109200	1042200	0	38415900	0	1923300
O95163	Elongator complex protein 1	2	1	1	2	0	0	1	2	0	1	0	0	1380190	1068700	210790	0	0	1952370	0	0	570360	246930	0	1833390
O15042	U2 snRNP-associated SURP motif-containing protein	4	1	0	1	1	1	1	3	0	0	1	0	8692200	1080900	0	906260	1735400	891890	1453700	0	0	1561600	0	4737150
Q13151	Heterogeneous nuclear ribonucleoprotein A0	2	3	0	1	1	2	1	2	0	1	1	1	5308500	3961700	0	3818500	3462600	683810	1448100	557430	1926000	1219100	0	3550700
Q8TDY2	RB1-inducible coiled-coil protein 1	3	1	1	2	0	0	1	2	0	1	1	1	113925500	6034700	14684000	0	0	6907650	18785000	4584700	9006100	11087000	0	9131700
P63151	Serine/threonine-protein phosphatase 2A 55 kDa regulatory subunit B alpha isoform	3	1	0	0	2	0	1	0	0	1	2	0	6300300	1019700	0	0	2644850	0	2321770	0	1080200	1505900	0	0
Q9NY27	Serine/threonine-protein phosphatase 4 regulatory subunit 2	4	1	0	1	2	0	2	0	0	3	1	0	7614710	398740	0	0	5264200	552320	1613300	0	4694300	2264850	0	0
Q14315	Filamin-C	2	1	3	3	5	4	5	4	4	4	3	2	4208800	1000300	3337840	5263700	10328110	1859630	2875330	1938370	6188220	4788120	5134300	4759190
Q15369	Transcription elongation factor B polypeptide 1	2	1	1	1	3	3	3	3	2	3	2	0	3625600	437640	527300	3535010	9105800	1307500	3114900	0	3569990	6040500	1700520	3577250
P05141	ADP/ATP translocase 2;ADP/ATP translocase 2, N-terminally processed	8	6	4	6	7	7	6	9	6	9	8	4	56972300	23299820	13868600	38510050	66979000	19273800	58505100	10457200	75205300	23711300	21893900	65124300
Q16576	Histone-binding protein RBBP7	6	6	7	7	7	8	5	8	8	5	9	5	44318100	14766800	15570670	31631670	47400400	15695100	29781850	8266330	25451100	29073300	17471430	32089200
P04350;P68371;P07437	Tubulin beta-4A chain;Tubulin beta-4B chain;Tubulin beta chain	3	3	3	4	2	4	4	4	3	3	3	2	87090000	20568510	18173100	65396810	96630000	48501480	61014900	13588300	74056300	54987870	21853700	53803390
P68363;P68366;Q71U36;Q13748;Q6PEY2	Tubulin alpha-1B chain;Tubulin alpha-4A chain;Tubulin alpha-1A chain;Tubulin alpha-3C/D chain;Tubulin alpha-3E chain	5	4	4	4	5	6	4	6	4	5	4	5	63508600	29276900	26806500	93833300	131322600	37455500	87368000	18799130	102110600	59351000	37978300	112019000
P68363;P68366;A6NHL2;Q9BQE3;Q71U36;Q13748	Tubulin alpha-1B chain;Tubulin alpha-4A chain;Tubulin alpha chain-like 3;Tubulin alpha-1C chain;Tubulin alpha-1A chain;Tubulin alpha-3C/D chain	4	4	3	5	4	4	3	5	4	4	4	3	44175200	15081950	20384300	68938900	100502400	28673100	52844800	10260220	41109620	26252900	20999220	54350700
P56270	Myc-associated zinc finger protein	11	10	0	9	12	1	9	10	2	10	10	0	54263900	23858280	0	979320	46797730	23667590	28115720	0	30287440	29407260	1015470	36956280
Q92878	DNA repair protein RAD50	8	6	4	1	5	5	2	5	3	1	5	1	15170260	5505770	5042590	7041770	9362340	1083900	5512540	463160	1162800	1793530	11697640	8148930
none		9	9	10	7	15	8	8	12	12	10	9	8	172806690	55445690	70945330	148021300	140109100	61340310	97810010	42724500	109314520	128204100	159603040	142801600
P29401	Transketolase	1	0	2	1	0	3	3	1	1	2	2	2	1800400	0	3300300	11688700	0	1085600	3289200	2266600	3200500	6015400	1848400	647860
Q92945	Far upstream element-binding protein 2	12	6	10	11	8	12	10	10	10	9	8	8	36137180	6411750	17090580	34919400	24283470	11171420	17301170	12125960	18995350	22640100	18322130	15548390
P52272	Heterogeneous nuclear ribonucleoprotein M	1	0	2	3	0	2	1	2	1	1	3	1	1800700	0	2143740	1752730	0	2400020	5344500	641040	1734300	5505600	924210	2389340
O00571;O15523	ATP-dependent RNA helicase DDX3X;ATP-dependent RNA helicase DDX3Y	8	2	3	4	4	3	6	5	1	4	2	3	17405970	1374430	2595120	6103600	8471000	4462300	5699000	1176650	6982260	12878690	718550	7703030
Q96AY4	Tetratricopeptide repeat protein 28	5	1	0	0	1	3	2	2	1	0	2	1	6836540	304040	0	1886930	1418300	0	1806730	361350	0	1709520	616150	1511150
Q9P270	SLAIN motif-containing protein 2	17	12	9	13	11	12	11	13	11	14	13	7	63810890	17426800	13322340	26124760	31493500	24871620	26544040	7083970	41197200	26007580	14586690	27732030
P41250	Glycine--tRNA ligase	4	1	2	6	3	4	5	5	2	4	4	2	7606300	628610	1999350	6934320	7665400	4646640	5135060	1191780	6644000	7223990	2000950	5788690
Q5SWX8	Protein odr-4 homolog	8	4	2	4	6	6	6	5	4	6	6	2	24288600	2631100	1066910	8854930	23064100	3331580	8268260	999740	10711400	12661910	4191520	6020650
Q99729	Heterogeneous nuclear ribonucleoprotein A/B	9	10	7	8	13	5	7	11	7	9	11	3	41979100	20081430	13531010	10073740	67184310	9703790	38937700	3342140	32950080	18825500	9431110	39547900
P13010	X-ray repair cross-complementing protein 5	9	9	5	6	9	6	5	11	4	6	7	4	36432800	17324900	8956350	12912230	38988300	11057680	23071500	4022650	18538700	18074600	5191410	31910400
O43242	26S proteasome non-ATPase regulatory subunit 3	18	12	6	12	18	13	13	16	15	14	14	8	51939160	13982160	11703130	40595300	66431260	18030140	32513740	8825420	40803900	28555560	24417270	33258610
P42704	Leucine-rich PPR motif-containing protein, mitochondrial	11	3	8	6	9	14	11	9	6	11	8	7	31524400	1984510	11137910	36288700	20493600	6066190	11768220	6095450	22009050	22519270	6571050	11666580
Q16543	Hsp90 co-chaperone Cdc37;Hsp90 co-chaperone Cdc37, N-terminally processed	8	5	6	6	8	9	9	7	8	8	7	6	42011000	6008210	11828710	29695900	35624500	14297600	20217700	8398740	28146300	29955000	15667400	15735100
Q03393	6-pyruvoyl tetrahydrobiopterin synthase	8	6	8	7	7	11	8	8	8	8	9	6	64824900	23803700	48845700	124321430	94875000	29072450	66013780	34168870	82039400	57467920	59976800	54838600
P18669	Phosphoglycerate mutase 1	0	1	1	1	0	4	2	1	1	1	1	1	0	994590	2825600	10354700	0	517390	2408300	2109600	2245600	3451800	4595400	1081700
Q9BUF5	Tubulin beta-6 chain	2	5	2	3	2	2	2	5	1	1	1	2	3094600	8112540	3833400	5512000	5403400	4166210	1751500	1445670	1496400	7000500	1406200	12021340
P35637	RNA-binding protein FUS	8	6	6	6	7	7	7	8	4	9	6	5	64438000	13706570	24397300	60998800	59746700	16963700	38203300	11954800	41451350	34908300	28946500	58895600
Q14558	Phosphoribosyl pyrophosphate synthase-associated protein 1	27	2	14	17	23	19	23	21	17	27	20	17	224836500	892820	25537880	56538460	125491000	34432070	62845540	17406360	134824920	119576400	37207490	65882300
Q15233	Non-POU domain-containing octamer-binding protein	24	20	13	17	21	20	22	18	16	19	20	14	139671750	41174500	45681400	90465400	109977150	50626750	75286980	24234220	96267300	90837970	57223340	70772500
P39019	40S ribosomal protein S19	9	4	4	8	5	10	8	7	7	9	9	3	45621400	2380920	6427540	20954230	13743570	9175870	17449800	2548940	87953080	12143450	11367470	11753850
Q8NBJ5	Procollagen galactosyltransferase 1	5	2	0	1	5	3	3	2	3	4	4	0	10490600	1110180	0	3673890	9754400	1489000	6027410	0	5719500	4956000	2382150	3209400
P62241	40S ribosomal protein S8	9	9	7	9	8	8	9	10	5	8	8	4	32735140	27071600	13340430	24599670	69873100	18411990	30163000	5571300	26078800	32253700	16203200	50162800
P67936	Tropomyosin alpha-4 chain	4	0	4	1	3	1	3	0	1	1	2	4	6606000	0	6067730	2609800	6326100	692070	4345260	3926310	1979900	5202500	2556100	0
CON__Q86YZ3;Q86YZ3	Hornerin	7	0	12	0	4	0	3	2	0	1	38	14	6564820	0	12156400	0	2606110	0	155585580	12312470	486370	1731470	0	447090
Q8N8S7	Protein enabled homolog	9	12	13	13	10	14	11	13	14	14	7	12	35423500	14269470	27559200	55096900	39624400	20072220	15879200	23523860	49113800	27945600	38031270	35590930
Q9BXP5	Serrate RNA effector molecule homolog	16	4	11	14	7	14	16	9	11	12	8	9	52708900	6140390	20737830	33766500	15764680	16160960	13548580	8351260	31681580	35617510	16753210	17342870
P14314	Glucosidase 2 subunit beta	9	6	7	10	6	9	8	9	7	7	6	5	54664000	9582760	24667850	42709300	35619900	19395030	21630700	8775050	23879550	36564930	22670700	20642330
O00303	Eukaryotic translation initiation factor 3 subunit F	11	10	11	10	13	11	12	15	8	14	11	6	45127700	16367090	19516280	41695500	89489400	19380270	41820600	6833740	55763500	52231600	16934700	61220900
P29692	Elongation factor 1-delta	26	24	14	21	25	20	23	27	17	25	22	15	721891200	270930490	120851470	302283350	727533500	232136340	375127800	74226910	445368700	402908900	131597740	537377020
P13639	Elongation factor 2	16	13	18	14	18	29	19	18	22	19	25	19	59493100	22724550	45711190	134847290	88331900	20687880	69601020	35808000	48158740	60297210	60891890	47051190
P60228	Eukaryotic translation initiation factor 3 subunit E	15	13	8	13	20	15	16	17	14	19	20	11	106057700	36804050	22019870	65528000	153847900	40774920	67684350	19937200	82252690	73257500	41266470	78376800
P40926	Malate dehydrogenase, mitochondrial	0	0	6	0	0	6	3	1	3	0	1	2	0	0	8266710	20213600	0	0	2406300	2075180	0	5240520	2548630	337570
P09874	Poly [ADP-ribose] polymerase 1	9	6	8	5	4	9	6	7	6	8	8	7	31706000	6646710	19634300	26705920	13556500	9015740	15077940	8225060	15752590	14643910	11516860	12830290
P25788	Proteasome subunit alpha type-3	9	9	5	8	14	8	10	10	9	11	12	8	27304400	13755310	10012850	25836700	83170800	13881790	33585450	10535580	38185690	37445470	18268690	26503290
Q9Y2H1	Serine/threonine-protein kinase 38-like	40	33	34	32	30	38	31	34	36	38	30	31	657683580	142293600	244244500	423199000	292964790	196920000	250669700	94824770	435380800	349443900	226385200	224059090
Q8NC51	Plasminogen activator inhibitor 1 RNA-binding protein	10	5	9	11	8	11	11	12	8	11	9	10	53008600	16276100	41849460	61983800	37475420	31073350	41739800	19793120	48050910	53897570	35616400	45581680
P04075	Fructose-bisphosphate aldolase A	8	4	14	7	8	19	13	8	11	11	12	11	21460670	5851290	37446040	83758100	27282650	9722570	29712010	21693110	34818550	39803180	33593840	19409750
P12277	Creatine kinase B-type	5	3	9	3	5	11	7	5	8	8	7	8	17102220	2796930	26880750	62427860	9692730	2184120	17500030	19053130	24674780	16589200	22472270	12745100
P62979	Ubiquitin-40S ribosomal protein S27a;Ubiquitin;40S ribosomal protein S27a	8	7	8	11	9	5	7	9	8	8	7	6	32305230	18460120	25262310	22643000	48557500	21703460	30552280	16540080	29226840	35801590	26147550	36688790
Q16531	DNA damage-binding protein 1	22	15	10	13	19	21	18	21	12	18	20	10	93687200	32952650	24313130	80020700	76102700	27330890	76271680	12882350	50334550	52425450	34992290	75327290
Q08945	FACT complex subunit SSRP1	9	6	5	11	5	8	8	9	6	9	8	3	32246600	4689960	9143200	15521840	14996400	17039980	15619460	2018390	25945500	20648400	8529400	19333210
Q8NCE2	Myotubularin-related protein 14	26	20	7	24	14	4	18	23	3	23	18	1	222040700	82365230	13788770	4387420	77103700	107286510	78361100	399560	170338480	112559200	3216870	123818580
Q9P2R3	Rabankyrin-5	48	39	43	44	48	46	41	47	51	47	44	41	395835190	114990910	181918590	306295860	385230750	138659340	227460470	90917540	259039410	250728340	220121680	217251590
P32119	Peroxiredoxin-2	8	5	5	4	8	7	8	8	2	6	9	3	16957310	5236070	18227390	15622500	56520100	3251170	26922400	3040820	13745700	27125300	2718800	26693600
P16615	Sarcoplasmic/endoplasmic reticulum calcium ATPase 2	1	1	0	1	6	2	6	2	0	1	1	0	2202500	335150	0	2463550	11168200	1163000	813630	0	1565300	6284710	0	2947200
P60891	Ribose-phosphate pyrophosphokinase 1	25	6	15	16	21	20	21	16	19	26	21	14	445252300	7460640	48787880	117284800	277385000	68731570	200885800	48627200	353623070	263794100	83485910	126727100
Q9NYF8	Bcl-2-associated transcription factor 1	19	20	16	8	24	19	13	19	18	15	22	15	63618450	36182160	32323510	50951460	158028780	9474170	82638340	14461350	41016940	30467920	31321590	71874930
Q9BUA3	Uncharacterized protein C11orf84	29	20	19	23	19	26	19	26	22	26	26	18	476944100	103102010	152148930	270758400	256968830	147067850	304921000	83852480	280360300	237022230	187655000	240958360
Q14152	Eukaryotic translation initiation factor 3 subunit A	63	54	54	55	57	52	53	64	46	63	54	36	547733000	245970640	231603120	321253120	650847100	217917540	313617551	101046720	356196230	353699750	205187310	454326760
P10809	60 kDa heat shock protein, mitochondrial	63	49	48	54	53	57	50	64	49	52	48	44	761918470	225048310	276584380	473446260	602989650	230619450	340199220	166965140	509037600	477921370	296973710	464151620
Q13263	Transcription intermediary factor 1-beta	32	25	25	28	32	33	31	33	29	34	29	27	247780300	61582990	101749580	157704570	223329510	84540680	124005130	53142640	172247750	137795200	101008380	135831240
P06576	ATP synthase subunit beta, mitochondrial	21	19	14	16	27	21	19	28	17	23	15	16	150866900	52399100	34448690	91809700	258092700	50830000	62221500	21147110	111769650	110397500	47352260	157631160
Q15208	Serine/threonine-protein kinase 38	52	43	42	50	47	48	47	49	49	49	53	41	2235123300	516504270	575273800	938941800	1314830250	771795940	1353500310	363411390	1440112490	1086389300	699941500	923335960
Q9UHD8	Septin-9	11	7	6	6	14	10	11	12	7	10	10	5	33740300	11575740	10137200	22335880	48557600	8889050	26805680	4811280	28898300	26116610	12875690	30458480
P60174	Triosephosphate isomerase	1	0	3	2	0	7	2	1	6	4	4	6	1317800	0	4521800	17230000	0	776270	5138740	6601550	5619430	3395600	7497720	2088100
O43707;P12814	Alpha-actinin-4;Alpha-actinin-1	3	2	2	3	3	6	4	4	4	6	2	2	8787500	1519264	1421220	18844040	10472290	2061610	6540900	1568550	17462370	17783700	3434035	6884030
P43686	26S protease regulatory subunit 6B	14	13	13	15	16	14	15	15	15	17	16	10	72377700	38713380	42480570	79790100	133124900	44307230	86984700	27022790	77452500	70455610	55570500	70310000
Q13098	COP9 signalosome complex subunit 1	6	2	1	6	5	2	4	6	3	4	4	2	16247900	1836230	647900	2714400	12248400	6958910	5941980	1679740	7282000	6026400	2665000	9847120
P35606	Coatomer subunit beta	8	8	6	8	7	10	7	12	6	7	7	4	36040500	12430290	6075470	27028940	28500500	14129480	20349200	4999850	21357500	19944500	10174320	31447970
O60568	Procollagen-lysine,2-oxoglutarate 5-dioxygenase 3	2	1	0	0	5	1	1	4	1	3	5	1	6592100	413810	0	1185100	7965950	0	4327570	213130	3473400	1241000	751910	4169510
O75369;P21333;Q14315	Filamin-B;Filamin-A;Filamin-C	3	3	2	4	4	3	4	3	4	3	3	3	22913400	15640000	11340000	23414700	64797400	22814200	29371300	12328500	23490600	28161800	19259000	34455600
P0DMV9;P0DMV8;P11142;P54652;P34931	Heat shock 70 kDa protein 1B;Heat shock 70 kDa protein 1A;Heat shock cognate 71 kDa protein;Heat shock-related 70 kDa protein 2;Heat shock 70 kDa protein 1-like	1	1	0	1	2	2	1	3	1	3	2	1	19982000	7557200	0	32692400	29537300	1665000	30563100	7554000	35203860	26876000	19048000	23837500
P11177	Pyruvate dehydrogenase E1 component subunit beta, mitochondrial	0	0	0	1	1	1	1	2	0	1	2	0	0	0	0	651100	2156800	581380	2468400	0	1192600	1300100	0	2595100
P54886	Delta-1-pyrroline-5-carboxylate synthase;Glutamate 5-kinase;Gamma-glutamyl phosphate reductase	3	0	0	2	1	3	2	2	2	1	1	1	6592390	0	0	5969500	1373700	2018360	628640	926670	1961200	2952500	2078290	1344360
Q12904	Aminoacyl tRNA synthase complex-interacting multifunctional protein 1;Endothelial monocyte-activating polypeptide 2	1	1	0	2	2	1	2	3	0	0	2	0	1442500	622950	0	1065400	3662400	1329190	2985880	0	0	1979530	0	3233260
Q9Y383;Q9NQ29	Putative RNA-binding protein Luc7-like 2;Putative RNA-binding protein Luc7-like 1	3	0	0	1	3	2	2	2	2	2	2	1	9579400	0	0	2187990	7346600	602570	3287900	425630	2976300	3411200	1917190	3695100
Q9Y678	Coatomer subunit gamma-1	8	8	3	8	8	6	7	9	6	9	6	4	31836000	13423800	5682700	15725200	27847100	16307590	14591960	3078600	23905660	17994200	12180800	29034500
Q9Y3I0	tRNA-splicing ligase RtcB homolog	3	2	3	3	3	4	3	4	3	4	4	1	5224790	1291960	3811070	6250700	5938600	3758340	5706600	686980	6300900	6540800	3669630	6373250
P09543	2,3-cyclic-nucleotide 3-phosphodiesterase	2	2	0	3	3	0	3	2	1	4	2	0	6550500	2459710	0	0	4278880	3046670	2790900	0	6360140	4108190	713430	2243410
Q05519	Serine/arginine-rich splicing factor 11	1	0	0	1	2	0	2	1	0	1	1	0	3045700	0	0	0	3897900	585430	1078500	0	2238200	3188300	0	770610
Q15366	Poly(rC)-binding protein 2	3	0	1	2	2	2	3	2	1	2	3	0	6237700	0	1236500	5906100	5101500	1836350	4097900	0	1632620	4363000	768650	3024800
O95785	Protein Wiz	0	0	0	1	1	0	0	1	1	0	0	0	0	0	0	0	3095900	386980	0	0	0	0	1143100	1891700
P31946;P27348;P63104	14-3-3 protein beta/alpha;14-3-3 protein beta/alpha, N-terminally processed;14-3-3 protein theta;14-3-3 protein zeta/delta	0	0	0	0	1	1	1	0	1	0	0	0	0	0	0	895590	1323100	0	0	0	0	855290	402680	0
P67775;P62714;P60510	Serine/threonine-protein phosphatase 2A catalytic subunit alpha isoform;Serine/threonine-protein phosphatase 2A catalytic subunit beta isoform;Serine/threonine-protein phosphatase 4 catalytic subunit	0	0	0	1	0	1	1	1	0	1	0	0	0	0	0	1483700	0	1057600	0	0	2007900	2148600	0	1140500
Q00978	Interferon regulatory factor 9	0	0	0	1	0	1	1	1	0	1	1	0	0	0	0	5041300	0	3225500	4106500	0	3719100	2793200	0	2936900
Q08379	Golgin subfamily A member 2	0	0	0	1	1	0	0	1	1	1	0	0	0	0	0	0	689650	345200	0	0	467630	0	256980	411890
Q9Y5M8	Signal recognition particle receptor subunit beta	0	0	0	1	0	1	2	0	0	1	1	1	0	0	0	974270	0	1177000	1470900	883450	1590300	3695300	0	0
O15397	Importin-8	5	3	2	3	4	5	4	4	4	4	4	4	13062000	1650800	2757800	19092000	17111700	3195830	7852500	3477900	11544300	8397500	8056600	7039420
P55209;Q99733	Nucleosome assembly protein 1-like 1;Nucleosome assembly protein 1-like 4	3	2	1	3	2	3	3	3	2	3	3	2	17152000	3478500	1995600	11701300	13005500	5599200	8505200	2223890	13127000	13043100	4283200	8185700
Q15181	Inorganic pyrophosphatase	2	0	5	1	3	5	3	1	5	3	2	5	3980000	0	12464100	21087800	10683600	696570	3124400	7418230	5578020	4037300	15689860	1690400
Q6Y7W6	PERQ amino acid-rich with GYF domain-containing protein 2	5	1	1	3	3	3	4	4	1	4	3	3	10546800	261870	918860	3918570	6214200	2918790	2991700	1560290	4769690	5559420	357460	4277680
Q9BQE3	Tubulin alpha-1C chain	4	4	1	3	4	4	4	4	3	4	3	3	13429700	3604580	1512600	22387100	28554000	7044300	10398300	2906290	14871700	16721100	5192900	16240400
Q99417	C-Myc-binding protein	9	5	8	9	7	7	8	9	6	7	6	4	105709100	22798340	30096900	52194260	95892600	43635500	41914590	7119080	48292590	49298300	34529500	52552860
Q9Y265	RuvB-like 1	15	7	8	8	13	10	11	12	8	13	11	6	43934700	11525640	18676890	24915780	75723100	20248210	33020130	6875080	44182990	35982600	16659120	43865240
P30876	DNA-directed RNA polymerase II subunit RPB2	7	3	1	4	5	3	3	6	3	6	4	2	13102500	4138280	610980	3815200	8288700	3982800	5559300	1068300	8710080	3421980	2012110	8032180
P61201	COP9 signalosome complex subunit 2	3	3	2	2	3	4	3	4	2	3	2	2	10026900	3907830	1818760	9534100	9371600	2533000	2390000	1240560	7449200	5417330	1858000	6459800
Q58FF8	Putative heat shock protein HSP 90-beta 2	2	2	2	3	1	3	3	2	2	3	2	3	10771900	2647850	4919900	16351000	5946600	7275600	4838600	3048120	10385400	11972800	3743200	5378200
Q8N163	Cell cycle and apoptosis regulator protein 2	5	3	3	3	6	3	4	6	2	3	5	3	13941700	3832070	3458030	5007300	19570200	3350980	9545300	2098920	6887800	7698500	3049500	13462160
Q15654	Thyroid receptor-interacting protein 6	2	0	0	1	1	1	2	0	1	3	2	1	2293100	0	0	710810	1244500	358300	1948780	239050	2802980	1801630	491650	0
O75629	Protein CREG1	0	0	0	0	0	1	1	0	0	0	0	0	0	0	0	1758600	0	0	0	0	0	18730000	0	0
P04259;CON__P02538;P02538;CON__O95678;O95678;CON__P48668;P48668;CON__P04259	Keratin, type II cytoskeletal 6B;Keratin, type II cytoskeletal 6A;Keratin, type II cytoskeletal 75;Keratin, type II cytoskeletal 6C	0	0	0	0	0	1	1	0	0	0	0	1	0	0	0	656510	0	0	0	89767	0	9712800	0	0
P22392;O60361	Nucleoside diphosphate kinase B;Putative nucleoside diphosphate kinase	0	0	1	0	1	1	1	0	1	0	1	1	0	0	480720	1099200	1307500	0	860790	503640	0	1556500	420640	0
P55786;A6NEC2	Puromycin-sensitive aminopeptidase;Puromycin-sensitive aminopeptidase-like protein	0	0	0	0	1	0	0	0	1	1	0	0	0	0	0	0	1946300	0	0	0	968660	0	875070	0
Q13573	SNW domain-containing protein 1	0	0	0	0	0	1	0	1	0	0	1	0	0	0	0	1104200	0	0	3479800	0	0	0	0	1121400
Q15691	Microtubule-associated protein RP/EB family member 1	1	0	0	0	0	2	0	1	1	1	1	0	2027500	0	0	2099650	0	0	1787000	0	1786300	0	743490	805140
Q86XE0	Sorting nexin-32	0	0	0	0	1	0	0	0	1	0	0	0	0	0	0	0	8331000	0	0	0	0	0	1218200	0
Q8IYF3	Testis-expressed sequence 11 protein	0	0	0	0	0	1	0	1	0	0	0	1	0	0	0	312650	0	0	0	414550	0	0	0	4829600
Q99880;Q99879;Q99877;Q93079;Q8N257;Q5QNW6;Q16778;P62807;P58876;P33778;P23527;P57053;P06899;O60814	Histone H2B type 1-L;Histone H2B type 1-M;Histone H2B type 1-N;Histone H2B type 1-H;Histone H2B type 3-B;Histone H2B type 2-F;Histone H2B type 2-E;Histone H2B type 1-C/E/F/G/I;Histone H2B type 1-D;Histone H2B type 1-B;Histone H2B type 1-O;Histone H2B type F-S;Histone H2B type 1-J;Histone H2B type 1-K	0	0	0	1	0	0	0	1	0	0	0	0	0	0	0	0	0	955130	0	0	0	0	0	4559800
O00410	Importin-5	2	0	1	2	1	1	1	2	1	1	1	1	2536640	0	471820	1824400	1830800	1340440	1003800	462680	1333800	646550	736950	1684200
P05141;Q9H0C2;P12236;P12235	ADP/ATP translocase 2;ADP/ATP translocase 2, N-terminally processed;ADP/ATP translocase 4;ADP/ATP translocase 4, N-terminally processed;ADP/ATP translocase 3;ADP/ATP translocase 3, N-terminally processed;ADP/ATP translocase 1	1	1	1	2	1	1	1	2	1	1	1	1	11691000	4272100	2398600	9102900	17741000	8281550	7318300	2078400	9894100	10420000	2509000	13906410
P36542	ATP synthase subunit gamma, mitochondrial	4	1	0	2	2	2	3	2	1	3	1	1	6711800	552490	0	2361580	4436800	2866800	1130900	913720	4521760	4231700	1711000	3025090
Q96BD8	Spindle and kinetochore-associated protein 1	4	1	2	3	2	3	2	3	3	4	3	3	8898400	654440	2205380	7219300	3609700	2983160	4462230	2364810	7631800	2713000	3867200	3711650
Q9HC35	Echinoderm microtubule-associated protein-like 4	4	1	2	2	3	3	3	3	2	1	2	1	9364800	922140	3193700	6429700	8698400	1195330	2244900	988180	1518100	3464380	1734530	5156800
O14920	Inhibitor of nuclear factor kappa-B kinase subunit beta	0	1	1	1	0	1	1	1	0	1	1	1	0	14449000	13535000	15726000	0	9660800	18197000	11009000	16100000	10612000	0	11549000
O94991	SLIT and NTRK-like protein 5	2	1	1	1	0	3	2	1	1	1	1	1	4275150	1000500	244250	7671060	0	196840	1918100	1086300	4425200	4858160	1573000	1766400
O95239	Chromosome-associated kinesin KIF4A	2	1	1	2	2	0	2	1	1	1	2	1	1760480	311090	362550	0	998360	687150	761780	169810	642670	911900	221600	361160
P00367;P49448	Glutamate dehydrogenase 1, mitochondrial;Glutamate dehydrogenase 2, mitochondrial	1	0	1	0	1	1	1	0	1	0	1	1	1898900	0	766710	1415100	1539700	0	940240	401480	0	1831800	1176900	0
P06753;CON__Q3SX28;P07951	Tropomyosin alpha-3 chain;Tropomyosin beta chain	1	1	0	0	1	1	1	0	1	1	0	1	518190	141940	0	526400	421320	0	0	194380	382730	834190	433590	0
P07910	Heterogeneous nuclear ribonucleoproteins C1/C2	0	0	1	0	1	0	1	0	0	0	0	0	0	0	596930	0	1108900	0	0	0	0	2996000	0	0
P08238;P07900;Q14568;Q58FF8	Heat shock protein HSP 90-beta;Heat shock protein HSP 90-alpha;Heat shock protein HSP 90-alpha A2;Putative heat shock protein HSP 90-beta 2	4	3	2	2	3	4	4	2	3	3	3	3	98211900	17932200	14243000	92081200	54037300	16490800	40268900	20469000	26612600	56619500	15541700	13552900
P12236	ADP/ATP translocase 3;ADP/ATP translocase 3, N-terminally processed	1	1	0	1	1	0	0	2	0	0	0	0	936310	887400	0	0	757650	461370	0	0	0	0	0	5402600
P23528	Cofilin-1	12	10	13	9	12	14	9	13	13	10	14	12	60072600	21643890	37249310	76394280	109417100	16179520	73765390	24781950	35999420	33445400	42242880	54981220
P31943;P52597	Heterogeneous nuclear ribonucleoprotein H;Heterogeneous nuclear ribonucleoprotein H, N-terminally processed;Heterogeneous nuclear ribonucleoprotein F;Heterogeneous nuclear ribonucleoprotein F, N-terminally processed	2	2	2	2	2	2	3	3	0	2	2	2	17086800	1751010	3477600	4906200	5306200	4408400	9410500	1169590	7055500	11085000	0	8727000
P31946	14-3-3 protein beta/alpha;14-3-3 protein beta/alpha, N-terminally processed	3	3	5	5	2	4	5	4	2	4	3	2	8579500	2987020	6951550	13601600	9529400	7454270	5505100	3047100	13549350	11085720	4842660	10358560
P42167	Lamina-associated polypeptide 2, isoforms beta/gamma;Thymopoietin;Thymopentin	0	1	0	1	0	0	0	0	1	0	1	0	0	928870	0	0	0	885270	1611400	0	0	0	657990	0
P50502;Q8NFI4;Q8IZP2	Hsc70-interacting protein;Putative protein FAM10A5;Putative protein FAM10A4	1	1	0	1	0	1	0	1	1	1	0	1	1519400	258090	0	1496800	0	694550	0	915000	1529600	0	869950	987500
P51858	Hepatoma-derived growth factor	1	0	1	0	0	2	1	0	1	1	0	1	1288700	0	1939400	3437250	0	0	0	1270900	1698100	1205000	1085700	0
P62753	40S ribosomal protein S6	6	6	6	4	7	7	6	6	6	7	6	6	39764900	18810200	10159080	24665820	52127300	11583200	26428050	6566070	23941670	22540320	11384100	28927920
P78347;Q86UP8;Q6EKJ0	General transcription factor II-I;General transcription factor II-I repeat domain-containing protein 2A;General transcription factor II-I repeat domain-containing protein 2B	1	0	1	1	0	1	1	1	0	1	1	0	1860200	0	500650	797300	0	571330	751260	0	1029700	794780	0	640530
Q14141	Septin-6	4	2	2	2	2	4	2	3	3	2	2	2	10679800	3211000	3582040	6357050	9191800	1700660	2238030	1697500	2630620	3904800	3687870	7290700
Q14444	Caprin-1	2	2	0	2	1	1	1	2	1	1	2	1	8552800	2591970	0	2311300	7283300	2261320	5518300	1057500	3699100	3246700	1614900	4266770
Q15057	Arf-GAP with coiled-coil, ANK repeat and PH domain-containing protein 2	18	11	16	15	12	18	13	15	17	18	17	15	76603300	19413520	59857110	72196100	34010220	23182770	40112840	18470330	63490100	31627500	35742170	44652570
Q16629	Serine/arginine-rich splicing factor 7	1	1	0	0	1	1	1	1	0	0	1	0	4949200	1701700	0	2312900	6280000	0	2927400	0	0	1927100	0	2244800
Q2TAY7	WD40 repeat-containing protein SMU1;WD40 repeat-containing protein SMU1, N-terminally processed	4	1	1	1	2	3	2	2	2	3	4	2	9049700	983030	1393400	4851650	4183300	1094900	6838820	836520	2663610	3112700	1596980	3087200
Q4G0J3	La-related protein 7	2	2	0	2	2	0	1	2	1	1	1	0	6312700	2087050	0	0	4480500	2187730	1656500	0	2441700	2313700	865680	5669400
Q562R1	Beta-actin-like protein 2	1	0	1	1	0	1	0	1	1	1	1	0	1281700	0	18049000	52495000	0	16668000	19380000	0	44990000	0	438070	592100
Q6P1J9	Parafibromin	5	4	2	4	3	4	2	5	4	3	4	4	8115820	3101600	1884700	4112000	5591400	2894380	4461510	1617880	3942200	2508100	2972370	4413840
Q7L014	Probable ATP-dependent RNA helicase DDX46	4	2	1	2	2	3	3	2	2	3	3	2	10608300	3998800	1318400	3965900	5461600	3070800	5613090	1283000	5751400	5164800	1944490	4289400
Q8IX18	Probable ATP-dependent RNA helicase DHX40	2	0	0	0	0	2	0	1	1	1	0	0	4152000	0	0	1669310	0	0	0	0	622660	0	523930	378090
Q8WWM7	Ataxin-2-like protein	0	1	1	1	0	1	0	1	1	0	0	1	0	1068000	1365900	1368900	0	767130	0	580040	0	0	800160	2044100
Q92499	ATP-dependent RNA helicase DDX1	1	1	0	1	1	0	2	0	0	1	2	0	599380	530160	0	0	692050	2796900	1267220	0	458020	2059240	0	0
Q96FW1	Ubiquitin thioesterase OTUB1	0	2	1	1	0	2	0	1	2	1	0	1	0	1776490	1017600	5231600	0	381700	0	404740	1052900	0	2768200	1937000
Q9BPX3	Condensin complex subunit 3	1	0	0	0	0	1	1	0	0	0	0	0	750300	0	0	975070	0	0	0	0	0	818290	0	0
Q9HCK8	Chromodomain-helicase-DNA-binding protein 8	1	0	0	1	0	0	0	1	0	0	0	0	1344200	0	0	0	0	852380	0	0	0	0	0	667390
Q9NSB8	Homer protein homolog 2	1	1	1	1	0	2	0	2	1	1	2	1	1695300	1093700	2134500	4502100	0	786880	2724700	653810	954980	0	1367300	2566390
Q9NYL9	Tropomodulin-3	4	1	1	2	1	3	2	2	2	3	3	0	8598640	564750	1541400	4539770	2832000	1696050	3733300	0	6223300	2664220	1794490	2123880
Q9UBF2	Coatomer subunit gamma-2	0	1	0	0	0	1	0	1	0	0	0	0	0	569200	0	815920	0	0	0	0	0	0	0	1388900
O14818	Proteasome subunit alpha type-7	8	5	6	6	9	3	5	8	5	5	9	4	21999300	12009700	16378400	19819000	45704700	12718540	27661420	8348500	26243100	27707700	14205700	31080990
P52597	Heterogeneous nuclear ribonucleoprotein F;Heterogeneous nuclear ribonucleoprotein F, N-terminally processed	5	3	5	3	3	6	4	4	4	4	4	4	8821300	2015990	7348200	14975900	6026500	1564020	5008560	2755330	5125000	5550950	6297730	5242420
Q9UHB9	Signal recognition particle subunit SRP68	4	4	3	3	3	4	3	4	3	3	2	3	13824300	3952610	4602700	10366200	7945060	3891200	4097400	2645940	13597000	8235200	3836450	7093900
Q9UMS4	Pre-mRNA-processing factor 19	3	2	3	3	4	0	1	4	2	4	3	1	9077000	1846810	2752810	0	10307400	3627490	5097400	271480	5441300	1739700	2175770	7204650
Q49A26	Putative oxidoreductase GLYR1	2	2	2	2	2	1	1	2	2	1	0	1	6563600	1685180	3350800	1090800	3702600	2244920	0	466350	3797000	814430	1585600	2508800
Q5H9R7	Serine/threonine-protein phosphatase 6 regulatory subunit 3	2	1	1	2	1	0	1	0	2	2	1	1	2807400	556420	470600	0	1221400	1157410	725870	376600	1258480	779970	834040	0
Q8IXB1	DnaJ homolog subfamily C member 10	4	1	1	3	1	1	1	4	0	3	1	1	11639600	1607500	1391900	3018200	7243200	3263490	2812300	949800	4715970	2267600	0	6446030
P15170	Eukaryotic peptide chain release factor GTP-binding subunit ERF3A	1	1	0	0	0	1	1	0	0	0	0	1	2381900	522800	0	2464700	0	0	0	725950	0	2729300	0	0
Q13885;Q9BVA1;Q9BUF5	Tubulin beta-2A chain;Tubulin beta-2B chain;Tubulin beta-6 chain	1	0	1	0	0	1	1	0	0	0	0	0	2887100	0	477420	1479600	0	0	0	0	0	1141100	0	0
Q5TAQ9	DDB1- and CUL4-associated factor 8	0	1	1	0	1	0	1	0	0	1	1	1	0	516640	538610	0	2474200	0	1232200	205860	578320	817960	0	0
Q9H857	5-nucleotidase domain-containing protein 2	1	0	1	0	1	0	1	0	0	1	2	0	2403200	0	517880	0	2015200	0	2352200	0	1112000	1136300	0	0
Q9Y490;Q9Y4G6	Talin-1;Talin-2	2	0	0	0	1	0	1	0	0	0	0	0	2958400	0	0	0	568190	0	0	0	0	662910	0	0
O43617	Trafficking protein particle complex subunit 3	1	1	1	0	1	1	1	1	0	1	1	0	1471500	330060	638240	1135300	1671600	0	744020	0	1050900	753540	0	1501600
O94915	Protein furry homolog-like	1	2	0	1	1	0	0	2	0	0	2	0	740950	1704860	0	0	5018400	377740	24276200	0	0	0	0	3275330
P05386	60S acidic ribosomal protein P1	1	1	1	0	1	1	1	1	0	1	1	1	4936900	1193600	1090100	1683900	5119400	0	4336500	274590	3904100	5066600	0	5197500
P08670;P04259;CON__P02538;P02538;CON__O95678;O95678;CON__P07744;CON__Q8VED5;CON__P48668;P48668;CON__P13647;P13647;CON__Q5XKE5;Q5XKE5;CON__P04259;CON__P05787;P05787;CON__H-INV:HIT000292931;CON__Q8N1N4-2;CON__Q7RTT2;Q8N1N4	Vimentin;Keratin, type II cytoskeletal 6B;Keratin, type II cytoskeletal 6A;Keratin, type II cytoskeletal 75;Keratin, type II cytoskeletal 6C;Keratin, type II cytoskeletal 5;Keratin, type II cytoskeletal 79;Keratin, type II cytoskeletal 8;Keratin, type II cytoskeletal 78	1	1	1	0	1	1	1	1	0	0	1	1	12552000	4908900	4647700	5325800	7587700	0	11220000	3075300	0	30819000	0	5923600
P32322;Q96C36	Pyrroline-5-carboxylate reductase 1, mitochondrial;Pyrroline-5-carboxylate reductase 2	1	1	1	1	0	1	0	1	1	1	1	1	2682900	511830	1034200	1361400	0	841430	1217600	678930	3545000	0	540770	887760
Q9NRN7	L-aminoadipate-semialdehyde dehydrogenase-phosphopantetheinyl transferase	1	1	1	1	0	1	0	1	1	0	1	0	341860	681040	249090	774230	0	357270	475250	0	0	0	244120	416450
O14530	Thioredoxin domain-containing protein 9	2	1	2	1	2	1	2	1	1	1	2	1	5877800	1098500	2345850	3891000	5397540	1412800	3085970	1282800	3726500	5981800	2153800	2044300
P37198	Nuclear pore glycoprotein p62	2	1	2	1	1	2	0	2	2	1	0	1	6045500	305670	2663140	6201300	2202600	879220	0	383900	2316400	0	2685050	3040310
P60709	Actin, cytoplasmic 1;Actin, cytoplasmic 1, N-terminally processed	2	1	2	1	2	1	1	1	2	1	1	2	28928700	8111700	23113100	26640000	23204900	10457000	15295000	9210500	17181000	18761000	15674500	17328000
P60842	Eukaryotic initiation factor 4A-I	3	3	3	3	2	3	3	3	2	2	3	2	14474100	5490170	8646500	15791400	10109200	6851600	12434300	5506860	7678400	13750400	8526000	10569300
Q15637	Splicing factor 1	1	2	2	1	2	1	1	1	2	0	1	0	2633300	2398510	3230800	2955600	6696200	1270000	1473800	0	0	1736200	3837700	2232600
Q92769	Histone deacetylase 2	4	4	2	4	2	3	3	5	1	3	4	1	9904600	2678080	1885020	5471200	6475600	4059860	4302910	343300	3498590	3445500	1271800	6737010
P08865	40S ribosomal protein SA	6	3	5	5	4	4	4	4	5	6	8	3	15778980	2734670	3964150	13173920	13519950	4859300	18729000	2342160	16230540	15548500	7987930	6547300
Q14257	Reticulocalbin-2	7	4	6	5	4	7	4	6	6	6	7	3	47881800	10268380	19300300	35341440	24790600	19304800	22826800	6839600	28606130	21057600	15843360	20483300
Q01518	Adenylyl cyclase-associated protein 1	11	4	7	6	6	8	8	6	6	8	7	4	43566500	5559820	12513230	18929720	27286100	13206430	13127860	4822220	24912350	24352470	11320380	16045400
O43852	Calumenin	6	2	5	5	2	4	4	4	3	3	4	5	27942900	1186980	10545300	14265600	3753800	7695500	6939400	5241720	10497400	11451700	5356000	5938800
Q6PKG0	La-related protein 1	4	5	2	3	4	2	3	3	3	2	3	3	7840300	4253900	753210	2330800	7915500	1501060	1635750	995330	2104390	2831820	1783840	3515280
P49588	Alanine--tRNA ligase, cytoplasmic	2	1	1	1	0	1	2	0	0	1	1	0	1687810	223770	373720	546400	0	480740	230860	0	910220	1258210	0	0
Q01433	AMP deaminase 2	2	1	1	0	0	2	1	1	0	1	2	1	4138100	1117800	1171400	2423330	0	0	1413700	343000	1387300	1126900	0	1353000
Q3YEC7	Rab-like protein 6	2	1	1	1	0	1	0	1	1	0	1	1	5021400	1304400	1936800	1634600	0	912990	1877000	979950	0	0	1539300	1919400
Q13247	Serine/arginine-rich splicing factor 6	3	2	2	3	1	1	1	3	1	2	4	0	5353600	2455260	1378150	660730	1423800	3007030	6236700	0	2937900	1016800	253170	4002710
Q8N684	Cleavage and polyadenylation specificity factor subunit 7	2	2	2	1	2	1	1	1	2	2	0	3	4240400	1345910	2402600	722270	3047800	740060	0	2089750	2417970	1667300	1920570	555080
Q96D71	RalBP1-associated Eps domain-containing protein 1	1	2	0	1	0	0	0	0	1	0	1	0	552000	556026	0	0	0	66019	2508200	0	0	0	330210	0
Q9BT25	HAUS augmin-like complex subunit 8	1	1	1	0	1	0	1	0	0	1	0	0	1862300	425430	852640	0	2084000	0	0	0	2778000	1323400	0	0
Q9BTA9	WW domain-containing adapter protein with coiled-coil	1	0	2	1	0	0	0	1	0	2	2	0	2838900	0	2061490	0	0	386780	2821400	0	4046600	0	0	1680600
Q9BY41	Histone deacetylase 8	1	2	3	0	1	3	1	0	3	1	1	2	3121200	2089960	11840700	23818300	8015900	0	4155100	4839600	2017600	2028000	10106310	0
Q9P2J5	Leucine--tRNA ligase, cytoplasmic	3	2	2	0	2	3	1	1	3	1	1	2	4185000	1328690	2670800	6476700	3343700	0	1749800	1451190	1817600	2082800	4651000	1043400
Q9Y5L4	Mitochondrial import inner membrane translocase subunit Tim13	2	0	1	0	0	1	1	0	0	0	0	1	2999900	0	662090	931250	0	0	0	344030	0	769320	0	0
P08238;Q58FF7	Heat shock protein HSP 90-beta;Putative heat shock protein HSP 90-beta-3	10	8	8	7	8	8	8	9	6	10	9	7	119074600	22550430	45221060	74856800	61010400	37444300	44678580	20192030	83786900	67784600	40685480	42348410
Q99613	Eukaryotic translation initiation factor 3 subunit C	4	3	1	2	1	2	1	1	3	3	2	2	23386000	7822100	3543700	7967200	10388000	5098970	5885210	3695400	12985100	5218400	7258090	3885600
O15294	UDP-N-acetylglucosamine--peptide N-acetylglucosaminyltransferase 110 kDa subunit	2	2	0	1	0	0	0	1	0	1	0	0	4485800	1526260	0	0	0	992280	0	0	730420	0	0	1114200
P17844	Probable ATP-dependent RNA helicase DDX5	4	1	1	1	1	1	1	2	0	1	1	1	5488980	556520	250300	575320	636740	489240	514160	282900	2178100	614910	0	1299880
P46940	Ras GTPase-activating-like protein IQGAP1	4	1	0	0	1	1	1	0	1	0	1	0	7785020	630650	0	1360400	933580	0	1503200	0	0	1470200	761210	0
P63104	14-3-3 protein zeta/delta	12	8	11	8	9	11	12	10	6	9	10	9	51819980	24422820	37595340	71693000	57685600	22567760	41728080	14151090	47198100	66592400	21256350	41862100
Q15020	Squamous cell carcinoma antigen recognized by T-cells 3	11	3	3	6	2	6	6	5	3	4	3	1	25418500	3049810	3155880	10405720	3790700	6561900	7962200	731630	9783200	13297600	3307110	8039950
Q9BWJ5	Splicing factor 3B subunit 5	5	5	4	5	4	2	4	4	3	2	5	2	38501400	15214750	9789400	10066200	35077200	10013200	17233640	3274300	13175200	14556800	11827900	27322700
P11171	Protein 4.1	3	2	0	1	0	0	0	1	0	0	0	0	5585200	978580	0	0	0	2385500	0	0	0	0	0	2369100
O60825	6-phosphofructo-2-kinase/fructose-2,6-bisphosphatase 2;6-phosphofructo-2-kinase;Fructose-2,6-bisphosphatase	20	12	4	15	10	6	10	16	5	14	10	1	84079680	19276940	3582860	9140930	28710100	26603080	24964393	408550	40745490	30127410	6460720	34136690
Q9UJW0	Dynactin subunit 4	4	4	4	1	4	1	2	3	1	4	1	1	9658600	3424790	4466430	604260	9989400	996560	1319100	918080	5987900	1438900	980670	5338200
P23588	Eukaryotic translation initiation factor 4B	86	82	95	87	75	90	83	81	88	89	78	82	5006452570	1303123590	6462319060	8928914210	3301671060	2045798240	2956329060	2634853710	3968792150	3198806140	4784238360	2068427530
O60749;Q13596	Sorting nexin-2;Sorting nexin-1	0	0	0	2	2	2	2	2	2	2	2	2	0	0	0	128310000	180176000	109378000	172461000	23535400	163924000	133149000	63690000	92987000
P04085	Platelet-derived growth factor subunit A	0	0	2	2	2	2	2	2	2	1	2	3	0	0	1151450	1951190	4027270	1189490	2218460	1324210	1268900	1678960	1731690	1937340
P63261	Actin, cytoplasmic 2;Actin, cytoplasmic 2, N-terminally processed	1	2	3	2	2	2	3	3	3	3	3	2	25584000	13362750	44839430	45231700	26005200	14530480	27495000	2472220	33562100	22663800	29596750	28675500
Q9NR30	Nucleolar RNA helicase 2	0	0	0	1	1	1	1	1	1	1	2	1	0	0	0	2579100	11245000	2267000	5639200	2192500	4696400	6551700	3612800	3192200
Q9Y230	RuvB-like 2	16	11	10	17	16	13	15	14	11	18	16	11	56047200	17739820	16623390	42173400	61163700	22591730	40371830	10972570	47981180	43539060	19414820	41135830
Q9Y262	Eukaryotic translation initiation factor 3 subunit L	19	20	9	17	21	16	16	20	15	19	16	10	97872700	33310740	16037950	56451600	126887800	40395630	64400560	13409470	74212870	69057500	36558500	83225700
O14579	Coatomer subunit epsilon	6	6	4	6	6	6	6	6	6	6	3	3	22396300	10928710	6288700	16889600	34175200	9576530	11027100	3906650	20420900	20000600	14152600	23090800
P05387	60S acidic ribosomal protein P2	3	1	0	3	3	0	3	3	0	4	3	1	9118300	491610	0	0	4332510	2762420	6954300	449550	6879500	6922500	0	3882100
P35080	Profilin-2	2	0	2	2	2	2	2	2	2	2	2	2	2891100	0	1397520	4411400	9243500	2091650	3260100	1484340	3800800	3203500	2705100	2871000
P42677;Q71UM5	40S ribosomal protein S27;40S ribosomal protein S27-like	2	1	1	2	2	2	2	2	2	2	2	1	33352100	10147000	11634000	25207400	50033000	19110800	25826100	6748800	25070700	28074500	12080400	20674400
P67809;P16989;Q9Y2T7	Nuclease-sensitive element-binding protein 1;Y-box-binding protein 3;Y-box-binding protein 2	0	0	1	1	1	1	1	1	1	1	1	1	0	0	561370	560240	1579600	737680	922700	200760	804040	689050	410480	1381300
Q13162	Peroxiredoxin-4	2	1	1	2	2	2	2	2	2	1	2	1	15497800	2541900	3548400	9883700	7393900	6094200	6168200	1618600	4376000	7158100	6016000	6026300
Q16659	Mitogen-activated protein kinase 6	2	0	1	2	1	2	2	1	2	1	1	2	4124280	0	1591300	2567970	1397600	2625320	466140	1643610	1073000	3845290	3506400	958970
Q6PK81	Zinc finger protein 773	0	1	0	1	1	1	1	1	1	1	1	0	0	405470	0	20152000	39393000	18895000	35799000	0	39942000	25925000	12241000	27932000
Q92598;O95757	Heat shock protein 105 kDa;Heat shock 70 kDa protein 4L	2	1	1	2	2	2	2	2	2	2	2	1	3867400	843240	974850	3542300	3908200	2405200	2767810	796470	3267180	3211810	1833460	3334900
Q96EA4	Protein Spindly	1	0	0	2	1	0	2	1	0	1	1	0	1500400	0	0	0	1351100	1366210	562490	0	642470	1775770	0	429500
Q96S59	Ran-binding protein 9	0	1	0	1	1	1	1	1	1	1	1	2	0	1036900	0	1265100	2543400	545910	939840	943330	838750	1130100	744530	1329000
Q99627	COP9 signalosome complex subunit 8	1	0	0	1	1	1	1	1	1	1	1	1	1752300	0	0	1169200	1846300	1262700	837440	540380	1713400	1337700	1295800	960260
Q9Y608	Leucine-rich repeat flightless-interacting protein 2	1	1	1	2	1	2	2	1	2	1	2	1	3617000	1456900	1225500	4459500	3189700	2109010	2180100	1747300	1650700	2854600	2133000	2350600
P11142;P54652;P17066	Heat shock cognate 71 kDa protein;Heat shock-related 70 kDa protein 2;Heat shock 70 kDa protein 6	3	2	2	3	3	3	3	3	3	3	3	3	35990000	6640750	5538460	41795100	45048400	14306900	31534500	9151580	40510700	31988300	20332300	24496200
P60709;Q6S8J3;P63261	Actin, cytoplasmic 1;Actin, cytoplasmic 1, N-terminally processed;POTE ankyrin domain family member E;Actin, cytoplasmic 2;Actin, cytoplasmic 2, N-terminally processed	2	2	2	1	2	2	2	3	3	3	2	2	7596300	1664880	5290400	17342900	3757400	1135200	7058000	2790060	10850200	10721400	5283050	8689750
P61163	Alpha-centractin	3	2	1	3	5	3	2	4	2	2	3	2	15120900	5375970	3152900	11347600	25437200	8331500	16533100	4933500	8752900	11312800	5484700	21317500
Q00325	Phosphate carrier protein, mitochondrial	3	3	0	4	4	3	3	3	2	4	4	1	7299800	3445890	0	5890700	13851700	6969100	6537100	608460	8841300	6836000	2858400	8364700
Q14558;O60256	Phosphoribosyl pyrophosphate synthase-associated protein 1;Phosphoribosyl pyrophosphate synthase-associated protein 2	3	2	2	3	3	3	3	3	3	3	3	3	95432000	1259320	2954100	19640000	45603600	13480400	28024900	6541790	42274300	38840100	10690100	18575800
P49736	DNA replication licensing factor MCM2	14	5	8	12	10	12	10	8	10	15	8	8	55386550	8218240	15559960	45283200	36551340	23028990	22020550	9947990	49448960	37025000	21323700	18918850
P61927	60S ribosomal protein L37	3	3	2	3	3	3	3	3	3	3	3	2	13224100	6513240	2753910	5301090	17189400	5927520	9652230	2691700	6150370	7083550	4622050	9371860
P68363;P68366;A6NHL2;Q9BQE3;Q71U36	Tubulin alpha-1B chain;Tubulin alpha-4A chain;Tubulin alpha chain-like 3;Tubulin alpha-1C chain;Tubulin alpha-1A chain	3	2	3	3	3	3	3	3	3	3	3	2	77378400	18173700	20565800	92494800	150053000	55531300	97266800	14729400	63249000	51248600	30591400	92689600
P68363;P68366;Q9BQE3;Q71U36	Tubulin alpha-1B chain;Tubulin alpha-4A chain;Tubulin alpha-1C chain;Tubulin alpha-1A chain	2	3	3	3	3	3	3	3	3	3	3	3	16464700	9551400	15410800	21795000	71957400	17301650	32328300	7275240	25027300	17758900	13831300	34884500
O00743	Serine/threonine-protein phosphatase 6 catalytic subunit;Serine/threonine-protein phosphatase 6 catalytic subunit, N-terminally processed	1	0	1	1	1	1	1	1	1	1	1	1	2321100	0	874540	2006600	5478100	2582700	2624400	1240800	2479200	3505500	2353900	3866400
O15541	RING finger protein 113A	1	0	1	1	1	1	1	1	1	1	0	1	2917000	0	1001100	1420600	1501900	1104500	0	386440	2092200	1908500	1484800	1081400
O75369;Q14315	Filamin-B;Filamin-C	1	1	0	1	1	1	1	1	1	1	1	1	2238700	744880	0	2075100	2468700	1083400	2246400	783420	1920300	2445900	1127600	2090000
P0DMV9;P0DMV8;P11142;P54652;P17066;P34931	Heat shock 70 kDa protein 1B;Heat shock 70 kDa protein 1A;Heat shock cognate 71 kDa protein;Heat shock-related 70 kDa protein 2;Heat shock 70 kDa protein 6;Heat shock 70 kDa protein 1-like	1	1	0	1	1	1	1	1	1	1	1	1	16003000	5459300	0	12877000	12169000	7562800	12885000	4781600	13280000	14341000	6391400	10947000
P10412;P16402;Q02539;P22492;P16401;P16403	Histone H1.4;Histone H1.3;Histone H1.1;Histone H1t;Histone H1.5;Histone H1.2	1	1	0	1	1	1	1	1	1	0	1	1	11763000	153530	0	3777700	8662400	3677500	4886400	1533500	0	3853500	1960900	7942300
P18669;P15259	Phosphoglycerate mutase 1;Phosphoglycerate mutase 2	1	0	1	1	1	1	1	1	1	1	1	1	1124700	0	1579700	3504100	1021900	494910	1472200	1692700	1165600	2337000	1661400	965570
P23458;O60674	Tyrosine-protein kinase JAK1;Tyrosine-protein kinase JAK2	1	1	0	1	1	1	1	1	1	1	1	1	8028100	1239000	0	3491100	5221800	3499400	2535300	838400	4385400	3431500	2155400	3110700
P29692;P24534	Elongation factor 1-delta;Elongation factor 1-beta	1	1	0	1	1	1	1	1	1	1	1	0	43308000	9372500	0	14029000	40583000	8029900	15669000	0	833100	15160000	7950100	33418000
P35527	Keratin, type I cytoskeletal 9	1	1	0	1	1	1	1	1	1	1	1	0	23563000	1889300	0	505280	7558200	397450	77678000	0	1165700	550980	1472900	6232200
P39687	Acidic leucine-rich nuclear phosphoprotein 32 family member A	1	0	1	0	1	2	0	1	2	1	0	1	3131300	0	981230	6519600	3297100	0	0	1302400	4212700	0	3946690	2911000
P42167;P42166	Lamina-associated polypeptide 2, isoforms beta/gamma;Thymopoietin;Thymopentin;Lamina-associated polypeptide 2, isoform alpha;Thymopoietin;Thymopentin	1	0	1	1	1	1	1	1	1	1	1	0	1584700	0	529700	1703400	2279300	810250	983480	0	956450	872630	592040	1212500
P42677	40S ribosomal protein S27	1	1	0	1	1	1	1	1	1	1	1	1	4391100	2741700	0	4543000	5735500	2974200	4040600	1388900	3514000	2263300	1629800	4531600
P55036;A2A3N6	26S proteasome non-ATPase regulatory subunit 4;Putative PIP5K1A and PSMD4-like protein	1	1	0	1	1	1	1	1	1	1	0	0	2104400	513660	0	1744700	2106600	439850	0	0	1419000	1007500	695400	1672900
P60468	Protein transport protein Sec61 subunit beta	1	1	0	1	1	1	1	1	1	1	1	0	2742900	994420	0	1645800	3333700	1544700	1515400	0	1252100	1808600	457390	1358600
P61964	WD repeat-containing protein 5	1	1	0	1	1	1	1	1	1	1	1	0	1549500	691210	0	1102900	1667400	864750	1282200	0	1096000	848970	668020	1215400
P62195;Q8NB90	26S protease regulatory subunit 8;Spermatogenesis-associated protein 5	1	0	1	1	1	1	1	1	1	1	1	1	4944500	0	1964700	6253100	8805400	2335300	4089600	1228400	3331800	3130000	2459500	3728300
P68133;P68032;P63267;P62736;P60709;Q6S8J3;A5A3E0;P0CG38;P0CG39;P63261	Actin, alpha skeletal muscle;Actin, alpha cardiac muscle 1;Actin, gamma-enteric smooth muscle;Actin, aortic smooth muscle;Actin, cytoplasmic 1;Actin, cytoplasmic 1, N-terminally processed;POTE ankyrin domain family member E;POTE ankyrin domain family member F;POTE ankyrin domain family member I;POTE ankyrin domain family member J;Actin, cytoplasmic 2;Actin, cytoplasmic 2, N-terminally processed	1	0	1	1	1	1	1	1	1	1	1	0	74917000	0	40320000	80553000	38648000	40844000	36511000	0	43751000	40407000	40016000	35294000
Q13885	Tubulin beta-2A chain	1	1	0	1	1	1	1	1	1	1	1	0	4991800	2486900	0	5975000	8116600	2711400	3480200	0	5303900	5668100	3124600	6328500
Q15366;P57721	Poly(rC)-binding protein 2;Poly(rC)-binding protein 3	1	1	0	1	1	1	1	1	1	1	1	1	3856600	560970	0	3422900	1891600	752490	1602000	451180	1486000	1714800	1217100	1456400
Q9NQX3	Gephyrin;Molybdopterin adenylyltransferase;Molybdopterin molybdenumtransferase	1	1	0	1	1	1	1	1	1	0	1	0	2222300	1454300	0	2095600	3117800	868150	2330400	0	0	1875600	1130200	2536600
CON__Q04695;Q04695;CON__Q99PS0;CON__Q9C075;Q9C075	Keratin, type I cytoskeletal 17;Keratin, type I cytoskeletal 23	0	0	0	1	0	0	1	0	0	0	0	0	0	0	0	0	0	11822000	0	0	0	5375300	0	0
O15269	Serine palmitoyltransferase 1	1	0	0	1	1	0	1	1	0	0	1	0	1308800	0	0	0	1048200	570580	943760	0	0	908920	0	731930
O75607	Nucleoplasmin-3	0	0	0	1	0	0	1	0	0	0	0	0	0	0	0	0	0	1287700	0	0	0	2079500	0	0
P12236;P12235	ADP/ATP translocase 3;ADP/ATP translocase 3, N-terminally processed;ADP/ATP translocase 1	1	0	0	1	1	0	1	1	0	1	0	0	1751000	0	0	0	1379500	784370	0	0	1436900	1042200	0	1557700
P16615;Q93084	Sarcoplasmic/endoplasmic reticulum calcium ATPase 2;Sarcoplasmic/endoplasmic reticulum calcium ATPase 3	1	0	0	1	1	0	1	1	0	0	0	0	1810100	0	0	0	1751000	679720	0	0	0	1347300	0	900800
P17612	cAMP-dependent protein kinase catalytic subunit alpha	1	0	0	1	1	0	1	1	0	0	1	0	3171600	0	0	0	1972000	932980	1181400	0	0	1236500	0	1296300
P50502;Q8IZP2	Hsc70-interacting protein;Putative protein FAM10A4	1	0	0	1	0	1	1	0	1	0	0	0	1853100	0	0	1028700	0	884570	0	0	0	1377700	354410	0
Q9NX55	Huntingtin-interacting protein K	0	0	0	0	0	1	0	0	1	0	0	0	0	0	0	1749400	0	0	0	0	0	0	1439600	0
O60563	Cyclin-T1	2	1	2	2	2	2	2	2	2	2	2	2	5688000	1040700	2078430	1970190	4138300	1657770	2656640	1184360	1949690	3110410	1082250	2476040
P0DMV9;P0DMV8;P11142;P54652;P17066;P48741;P34931	Heat shock 70 kDa protein 1B;Heat shock 70 kDa protein 1A;Heat shock cognate 71 kDa protein;Heat shock-related 70 kDa protein 2;Heat shock 70 kDa protein 6;Putative heat shock 70 kDa protein 7;Heat shock 70 kDa protein 1-like	2	1	2	2	2	2	2	2	2	2	2	2	97577400	18919000	29428200	81416700	88717900	48352300	64627000	21818600	67469100	61579100	37823200	53448900
P10412	Histone H1.4	2	2	1	2	2	2	2	2	2	2	2	1	11807300	5215500	1056100	4911000	13368500	2871900	6034800	626110	11260900	9279100	3296700	7960400
P57081	tRNA (guanine-N(7)-)-methyltransferase non-catalytic subunit WDR4	1	1	1	1	1	2	1	1	2	1	1	1	17400000	5310900	9105700	63273000	18258000	5129700	16514000	4047500	17182000	10280000	9653200	5128900
P62937;F5H284	Peptidyl-prolyl cis-trans isomerase A;Peptidyl-prolyl cis-trans isomerase A, N-terminally processed;Peptidyl-prolyl cis-trans isomerase A-like 4D	2	2	1	2	2	2	2	2	2	2	2	2	9123100	10230210	4156200	16982200	19850100	4724080	19839900	6254160	9794590	7078850	11398500	17937300
P80297;P02795;P13640;CON__P67983;Q8N339;P04732	Metallothionein-1X;Metallothionein-2;Metallothionein-1G;Metallothionein-1M;Metallothionein-1E	1	1	1	1	1	2	1	1	2	1	1	1	1731800	957340	2586400	4441780	2602600	817680	1300500	2331100	987740	1264300	2474270	894570
Q9Y3D9	28S ribosomal protein S23, mitochondrial	2	2	1	2	2	2	2	2	2	2	2	2	6716800	4138100	1860000	4780500	8284300	3355700	7138300	2619300	5447100	4841200	4810800	7308700
Q06830;Q13162	Peroxiredoxin-1;Peroxiredoxin-4	4	4	2	4	4	3	4	4	3	4	3	3	104852400	51152960	14234600	45878000	248031300	37120100	133559000	14030500	95294900	95245700	20073000	157831800
A1XBS5	Protein FAM92A1	0	0	0	0	0	0	0	0	0	0	1	0	0	0	0	0	0	0	1874700	0	0	0	0	0
CON__P02666		0	0	0	0	0	0	0	0	0	2	0	0	0	0	0	0	0	0	0	0	9093100	0	0	0
CON__P02668		0	0	0	0	0	0	0	0	0	5	0	0	0	0	0	0	0	0	0	0	30729700	0	0	0
CON__P02754		0	0	0	0	0	0	0	0	0	3	0	0	0	0	0	0	0	0	0	0	21746600	0	0	0
CON__P05787;P05787	Keratin, type II cytoskeletal 8	0	0	0	0	0	0	0	0	0	0	1	0	0	0	0	0	0	0	581170	0	0	0	0	0
CON__P05787;P05787;CON__H-INV:HIT000292931	Keratin, type II cytoskeletal 8	0	0	0	0	0	0	0	0	0	0	0	0	0	0	0	0	0	0	0	0	0	0	0	0
CON__P05787;P05787;CON__H-INV:HIT000292931;CON__REFSEQ:XP_092267;CON__Q9H552	Keratin, type II cytoskeletal 8	0	0	0	0	0	0	0	0	0	0	0	0	0	0	0	0	0	0	0	0	0	0	0	0
O00311	Cell division cycle 7-related protein kinase	0	0	0	0	0	0	0	0	0	0	0	0	0	0	0	0	0	0	0	0	0	0	0	0
O00629	Importin subunit alpha-3	1	1	1	1	1	1	1	1	1	1	1	0	1908100	942440	1198600	1411200	2057200	1252000	1382300	0	1502500	1322400	1196100	1304600
O14734	Acyl-coenzyme A thioesterase 8	0	0	0	0	0	0	0	0	0	0	0	0	0	0	0	0	0	0	0	0	0	0	0	0
O15084	Serine/threonine-protein phosphatase 6 regulatory ankyrin repeat subunit A	0	0	0	0	0	0	0	0	0	0	0	0	0	0	0	0	0	0	0	0	0	0	0	0
O15235	28S ribosomal protein S12, mitochondrial	0	0	0	0	0	0	0	0	0	1	0	0	0	0	0	0	0	0	0	0	549460	0	0	0
O43324	Eukaryotic translation elongation factor 1 epsilon-1	1	1	1	1	1	1	1	1	1	1	1	1	2695600	1739300	834210	1661900	3722100	1201600	2485600	580240	1391800	2072900	769490	3306600
O43395	U4/U6 small nuclear ribonucleoprotein Prp3	1	0	0	0	1	0	0	1	0	0	1	0	8222600	0	0	0	3198400	0	1689900	0	0	0	0	1383400
O43583	Density-regulated protein	1	0	0	0	0	1	0	0	1	0	0	0	1967700	0	0	1660500	0	0	0	0	0	0	1524600	0
O43593	Lysine-specific demethylase hairless	0	0	0	0	0	0	0	0	0	0	0	0	0	0	0	0	0	0	0	0	0	0	0	0
O43765	Small glutamine-rich tetratricopeptide repeat-containing protein alpha	0	0	0	0	0	0	0	0	0	0	0	0	0	0	0	0	0	0	0	0	0	0	0	0
O43819	Protein SCO2 homolog, mitochondrial	0	0	0	0	0	0	0	0	0	0	0	0	0	0	0	0	0	0	0	0	0	0	0	0
O75419	Cell division control protein 45 homolog	0	0	0	0	0	0	0	0	0	0	0	0	0	0	0	0	0	0	0	0	0	0	0	0
O75880	Protein SCO1 homolog, mitochondrial	1	1	0	1	1	0	1	1	0	1	1	0	2118300	839830	0	0	2119700	955980	1444800	0	1503400	2303400	0	1082200
P04350;P68371;A6NNZ2;P07437;Q13885;Q9BVA1;Q9BUF5;Q3ZCM7	Tubulin beta-4A chain;Tubulin beta-4B chain;Tubulin beta-8 chain-like protein LOC260334;Tubulin beta chain;Tubulin beta-2A chain;Tubulin beta-2B chain;Tubulin beta-6 chain;Tubulin beta-8 chain	4	4	3	4	4	3	4	4	3	4	4	3	109448400	26895330	21851300	95849400	163035400	47862900	96155200	15507860	79308000	77518000	33431200	80642000
P04350;P68371;P07437;Q9BVA1;Q9BUF5	Tubulin beta-4A chain;Tubulin beta-4B chain;Tubulin beta chain;Tubulin beta-2B chain;Tubulin beta-6 chain	0	0	0	0	0	0	0	0	0	0	1	0	0	0	0	0	0	0	7342600	0	0	0	0	0
P04350;P68371;Q3ZCM7	Tubulin beta-4A chain;Tubulin beta-4B chain;Tubulin beta-8 chain	2	2	2	2	2	2	2	2	2	2	2	1	50835600	18000800	21729500	42482800	47846300	27816300	34749600	12031000	39822800	35142400	15694700	34410000
P05023;P13637;P50993;Q13733	Sodium/potassium-transporting ATPase subunit alpha-1;Sodium/potassium-transporting ATPase subunit alpha-3;Sodium/potassium-transporting ATPase subunit alpha-2;Sodium/potassium-transporting ATPase subunit alpha-4	3	1	1	3	3	2	2	2	1	2	2	1	10417800	1321600	602720	2847200	9531300	4621500	3698400	1235800	4780700	5558400	637820	5723300
P05976;P08590	Myosin light chain 1/3, skeletal muscle isoform;Myosin light chain 3	1	1	1	1	1	1	1	1	1	1	1	0	5388100	1308100	2137700	2789400	3322900	1332800	1998200	0	5567100	1886300	1457700	2197900
P06493;P24941;Q00526	Cyclin-dependent kinase 1;Cyclin-dependent kinase 2;Cyclin-dependent kinase 3	1	1	0	1	1	0	1	1	0	0	1	0	1617000	531570	0	0	1603600	766890	697350	0	0	848850	0	705130
P06733;P13929	Alpha-enolase;Beta-enolase	0	0	0	0	0	0	0	0	0	0	0	0	0	0	0	0	0	0	0	0	0	0	0	0
P07900;Q14568;Q58FG0	Heat shock protein HSP 90-alpha;Heat shock protein HSP 90-alpha A2;Putative heat shock protein HSP 90-alpha A5	1	1	1	1	1	1	1	1	1	1	1	1	14707000	3550800	5747200	10903000	9376800	3639100	4938700	4191600	5710900	6172200	5785100	4614400
P07910;P0DMR1;O60812;B7ZW38;B2RXH8	Heterogeneous nuclear ribonucleoproteins C1/C2;Heterogeneous nuclear ribonucleoprotein C-like 4;Heterogeneous nuclear ribonucleoprotein C-like 1;Heterogeneous nuclear ribonucleoprotein C-like 3;Heterogeneous nuclear ribonucleoprotein C-like 2	0	0	0	0	0	0	0	0	0	0	0	0	0	0	0	0	0	0	0	0	0	0	0	0
P08238;P14625	Heat shock protein HSP 90-beta;Endoplasmin	2	2	2	2	2	2	2	2	2	2	2	2	23576300	1880090	4585500	12453900	16555800	6485000	5099460	2194910	9338900	9785300	4254390	4916000
P08238;Q58FF7;P07900;Q58FF8	Heat shock protein HSP 90-beta;Putative heat shock protein HSP 90-beta-3;Heat shock protein HSP 90-alpha;Putative heat shock protein HSP 90-beta 2	0	0	0	0	0	0	0	0	0	0	0	0	0	0	0	0	0	0	0	0	0	0	0	0
P08238;Q58FF8	Heat shock protein HSP 90-beta;Putative heat shock protein HSP 90-beta 2	1	1	1	1	1	1	1	1	1	1	1	1	19031000	2469700	6118700	9906300	7034200	6732300	6615900	2546500	7508200	8835700	4147000	4073400
P08559	Pyruvate dehydrogenase E1 component subunit alpha, somatic form, mitochondrial	0	0	0	0	0	0	0	0	0	0	0	0	0	0	0	0	0	0	0	0	0	0	0	0
P08579	U2 small nuclear ribonucleoprotein B	2	3	0	1	3	1	1	3	1	1	0	0	8033760	6402350	0	3303700	8916280	2499900	0	0	3594400	3336600	1663900	7444690
P08670;P17661;Q16352;P07197	Vimentin;Desmin;Alpha-internexin;Neurofilament medium polypeptide	1	1	1	1	1	1	1	1	1	1	1	1	4227700	1290000	2185300	6601100	5299100	1958900	3646400	1224200	3555600	3339900	2488700	4203400
P0DMV9;P0DMV8;P11142	Heat shock 70 kDa protein 1B;Heat shock 70 kDa protein 1A;Heat shock cognate 71 kDa protein	1	1	1	1	1	1	1	1	1	1	2	1	10220000	3200300	7815000	8527000	9400100	10664000	9073910	2970700	7079800	7556000	3931200	7100600
P0DMV9;P0DMV8;P11142;P54652;P17066;P48741	Heat shock 70 kDa protein 1B;Heat shock 70 kDa protein 1A;Heat shock cognate 71 kDa protein;Heat shock-related 70 kDa protein 2;Heat shock 70 kDa protein 6;Putative heat shock 70 kDa protein 7	0	0	0	0	0	0	0	0	0	0	0	0	0	0	0	0	0	0	0	0	0	0	0	0
P0DMV9;P0DMV8;P17066;P48741	Heat shock 70 kDa protein 1B;Heat shock 70 kDa protein 1A;Heat shock 70 kDa protein 6;Putative heat shock 70 kDa protein 7	4	4	4	4	4	4	4	4	4	5	4	4	89800800	29478120	30345500	96601800	237737500	72630600	122238700	37581100	140838400	120368400	59186500	122419500
P10412;P16402	Histone H1.4;Histone H1.3	1	1	1	1	1	1	1	1	1	1	1	1	5934800	4835300	2231700	4112000	14947000	2873300	5170700	2217000	6667900	8971100	4118900	9751000
P10412;P16402;Q02539;P22492;P16403	Histone H1.4;Histone H1.3;Histone H1.1;Histone H1t;Histone H1.2	3	3	3	3	3	3	3	3	3	3	3	3	54765500	48256700	16924000	30483700	131280200	13912100	48075700	18739490	34963400	46783500	15818600	61142800
P11021;P0DMV9;P0DMV8;P11142;P54652;P34931	78 kDa glucose-regulated protein;Heat shock 70 kDa protein 1B;Heat shock 70 kDa protein 1A;Heat shock cognate 71 kDa protein;Heat shock-related 70 kDa protein 2;Heat shock 70 kDa protein 1-like	0	1	1	0	1	1	0	1	1	0	1	1	0	3097100	2437400	5583000	5979100	0	5484600	1913600	0	0	3460600	4477700
P11940;Q4VXU2;Q96DU9	Polyadenylate-binding protein 1;Polyadenylate-binding protein 1-like;Polyadenylate-binding protein 5	1	1	1	1	1	1	1	1	1	1	1	1	1543600	1457800	935540	23635000	27579000	15377000	16796000	8117800	25948000	15866000	8540100	13652000
P12111	Collagen alpha-3(VI) chain	0	0	0	0	0	0	0	0	0	0	0	0	0	0	0	0	0	0	0	0	0	0	0	0
P17028	Zinc finger protein 24	1	0	0	0	1	0	0	1	0	0	0	0	2344900	0	0	0	3063900	0	0	0	0	0	0	859340
P17858;P08237;Q01813	ATP-dependent 6-phosphofructokinase, liver type;ATP-dependent 6-phosphofructokinase, muscle type;ATP-dependent 6-phosphofructokinase, platelet type	0	0	0	0	0	0	0	0	0	0	0	0	0	0	0	0	0	0	0	0	0	0	0	0
P18615	Negative elongation factor E	0	0	1	0	0	1	0	0	1	0	0	1	0	0	546200	1599700	0	0	0	389260	0	0	469740	0
P18887	DNA repair protein XRCC1	0	0	0	0	0	0	0	0	0	0	0	0	0	0	0	0	0	0	0	0	0	0	0	0
P21333;Q14315	Filamin-A;Filamin-C	1	1	1	1	1	1	1	1	1	0	1	0	4440600	1032000	1321900	1381100	2224400	1253200	1459300	0	0	1529100	1129600	1370800
P27694	Replication protein A 70 kDa DNA-binding subunit;Replication protein A 70 kDa DNA-binding subunit, N-terminally processed	1	1	0	1	1	0	1	1	0	0	1	0	1514000	708410	0	0	2121500	454870	951950	0	0	720550	0	950200
P28799	Granulins;Acrogranin;Paragranulin;Granulin-1;Granulin-2;Granulin-3;Granulin-4;Granulin-5;Granulin-6;Granulin-7	0	0	0	0	0	0	0	0	0	0	1	0	0	0	0	0	0	0	2406300	0	0	0	0	0
P31040	Succinate dehydrogenase [ubiquinone] flavoprotein subunit, mitochondrial	5	4	2	5	4	2	5	4	2	3	4	3	10762200	2916350	2977990	3295800	6349230	4012120	4650990	1419050	4974160	6743200	1914840	7041730
P33402	Guanylate cyclase soluble subunit alpha-2	0	0	0	0	0	0	0	0	0	0	0	0	0	0	0	0	0	0	0	0	0	0	0	0
P35251	Replication factor C subunit 1	0	0	0	0	0	0	0	0	0	0	0	0	0	0	0	0	0	0	0	0	0	0	0	0
P35268	60S ribosomal protein L22	0	0	0	0	0	0	0	0	0	0	0	0	0	0	0	0	0	0	0	0	0	0	0	0
P49189	4-trimethylaminobutyraldehyde dehydrogenase	0	0	0	0	0	0	0	0	0	0	0	0	0	0	0	0	0	0	0	0	0	0	0	0
P49756	RNA-binding protein 25	1	1	1	1	1	1	1	1	1	1	1	1	1208400	534680	544750	1206300	1113800	403750	924050	339250	866480	960550	373870	716220
P49916	DNA ligase 3	0	0	0	0	0	0	0	0	0	0	0	0	0	0	0	0	0	0	0	0	0	0	0	0
P50502	Hsc70-interacting protein	1	0	0	0	0	1	0	0	1	1	0	0	3931900	0	0	5647100	0	0	0	0	4059700	0	2976500	0
P51784;Q13107	Ubiquitin carboxyl-terminal hydrolase 11;Ubiquitin carboxyl-terminal hydrolase 4	0	0	0	0	0	0	0	0	0	0	0	0	0	0	0	0	0	0	0	0	0	0	0	0
P52434	DNA-directed RNA polymerases I, II, and III subunit RPABC3	0	1	0	0	1	0	0	1	0	0	0	0	0	282300	0	0	1762200	0	0	0	0	0	0	1639200
P52565	Rho GDP-dissociation inhibitor 1	0	0	0	0	0	0	0	0	0	0	0	1	0	0	0	0	0	0	0	1853100	0	0	0	0
P56134	ATP synthase subunit f, mitochondrial	0	0	0	0	0	0	0	0	0	0	0	0	0	0	0	0	0	0	0	0	0	0	0	0
P60660;P14649	Myosin light polypeptide 6;Myosin light chain 6B	2	2	2	2	2	2	2	2	2	2	2	2	25461000	13041500	16544800	19589500	37383000	11159000	16078800	10958800	15915400	17330300	12975500	26526000
P61289	Proteasome activator complex subunit 3	1	1	1	1	1	1	1	1	1	1	1	1	2196900	772710	7725300	2621100	1607300	812290	1470300	1241100	1345500	1914700	1930600	1268900
P61981;Q04917;P31946;P63104	14-3-3 protein gamma;14-3-3 protein gamma, N-terminally processed;14-3-3 protein eta;14-3-3 protein beta/alpha;14-3-3 protein beta/alpha, N-terminally processed;14-3-3 protein zeta/delta	1	0	1	0	1	1	0	1	1	1	1	0	1721900	0	921570	1701900	2200600	0	2892000	0	1664800	0	1745200	1740900
P62906	60S ribosomal protein L10a	0	0	0	0	0	0	0	0	0	0	0	0	0	0	0	0	0	0	0	0	0	0	0	0
P63313	Thymosin beta-10	0	0	1	0	0	1	0	0	1	0	1	1	0	0	2854700	2872500	0	0	1563600	1481500	0	0	1555800	0
P68133;P68032;P60709;Q6S8J3;A5A3E0;P0CG38;Q9BYX7;P0CG39;P63261	Actin, alpha skeletal muscle;Actin, alpha cardiac muscle 1;Actin, cytoplasmic 1;Actin, cytoplasmic 1, N-terminally processed;POTE ankyrin domain family member E;POTE ankyrin domain family member F;POTE ankyrin domain family member I;Putative beta-actin-like protein 3;Putative beta-actin-like protein 3, N-terminally processed;POTE ankyrin domain family member J;Actin, cytoplasmic 2;Actin, cytoplas…	1	1	1	1	1	1	1	1	1	1	1	1	4869500	615720	1897800	3160900	1945800	1544700	1518900	387950	2420000	1429600	1560100	3356000
P68133;P68032;P63267;P62736;P60709;Q6S8J3;A5A3E0;P0CG38;P63261	Actin, alpha skeletal muscle;Actin, alpha cardiac muscle 1;Actin, gamma-enteric smooth muscle;Actin, aortic smooth muscle;Actin, cytoplasmic 1;Actin, cytoplasmic 1, N-terminally processed;POTE ankyrin domain family member E;POTE ankyrin domain family member F;POTE ankyrin domain family member I;Actin, cytoplasmic 2;Actin, cytoplasmic 2, N-terminally processed	2	2	2	2	2	2	2	2	2	2	2	2	40268000	14477500	27463900	38880200	45899000	13986700	22346400	16242500	22886600	33252400	31016800	22289300
P68133;P68032;P63267;P62736;P60709;Q6S8J3;A5A3E0;Q9BYX7;P63261;Q562R1	Actin, alpha skeletal muscle;Actin, alpha cardiac muscle 1;Actin, gamma-enteric smooth muscle;Actin, aortic smooth muscle;Actin, cytoplasmic 1;Actin, cytoplasmic 1, N-terminally processed;POTE ankyrin domain family member E;POTE ankyrin domain family member F;Putative beta-actin-like protein 3;Putative beta-actin-like protein 3, N-terminally processed;Actin, cytoplasmic 2;Actin, cytoplasmic 2, N-…	2	2	2	2	2	2	2	2	2	2	2	0	24444900	9070300	12733100	33322800	20722100	10774100	18002500	0	22273900	32680100	13665600	13780500
P68371	Tubulin beta-4B chain	3	3	3	3	3	3	3	3	3	3	3	3	62583300	27722700	24580100	59656700	85226400	27625900	55933400	23655400	53385400	54481100	29547600	50692000
P98175;P78332	RNA-binding protein 10;RNA-binding protein 6	1	1	1	1	1	1	1	1	1	1	1	1	137300000	40356000	76262000	65971000	54193000	36648000	46296000	32423000	54996000	55201000	51006000	59285000
Q03252	Lamin-B2	0	0	0	0	0	0	0	0	0	0	0	0	0	0	0	0	0	0	0	0	0	0	0	0
Q06187	Tyrosine-protein kinase BTK	0	0	0	0	0	0	0	0	0	0	0	0	0	0	0	0	0	0	0	0	0	0	0	0
Q13136;O75335;O75145;O75334	Liprin-alpha-1;Liprin-alpha-4;Liprin-alpha-3;Liprin-alpha-2	0	0	0	0	0	0	0	0	0	0	0	0	0	0	0	0	0	0	0	0	0	0	0	0
Q13247;Q08170;Q13243	Serine/arginine-rich splicing factor 6;Serine/arginine-rich splicing factor 4;Serine/arginine-rich splicing factor 5	1	1	1	1	1	1	1	1	1	1	1	1	6754500	2815000	2151900	3057700	6304900	1896000	8188300	709530	3527300	2646500	1203000	3747000
Q13585	Melatonin-related receptor	0	0	0	0	0	0	0	0	0	0	0	0	0	0	0	0	0	0	0	0	0	0	0	0
Q13619;Q13620	Cullin-4A;Cullin-4B	0	0	0	0	0	0	0	0	0	0	0	0	0	0	0	0	0	0	0	0	0	0	0	0
Q13724	Mannosyl-oligosaccharide glucosidase	0	0	0	0	0	0	0	0	0	0	0	0	0	0	0	0	0	0	0	0	0	0	0	0
Q14498	RNA-binding protein 39	0	0	0	0	0	0	0	0	0	0	0	0	0	0	0	0	0	0	0	0	0	0	0	0
Q15154	Pericentriolar material 1 protein	0	0	0	0	0	0	0	0	0	0	0	0	0	0	0	0	0	0	0	0	0	0	0	0
Q15390	Mitochondrial fission regulator 1	0	0	0	0	0	0	0	0	0	0	0	0	0	0	0	0	0	0	0	0	0	0	0	0
Q16181;Q6ZU15	Septin-7;Septin-14	1	1	1	1	1	1	1	1	1	1	1	1	5629200	1256500	1952400	4303600	7645100	1707300	3031700	969550	3564100	2301800	1791300	4248400
Q16720;P23634;Q01814;P20020	Plasma membrane calcium-transporting ATPase 3;Plasma membrane calcium-transporting ATPase 4;Plasma membrane calcium-transporting ATPase 2;Plasma membrane calcium-transporting ATPase 1	0	0	0	0	0	0	0	0	0	0	0	0	0	0	0	0	0	0	0	0	0	0	0	0
Q3ZCM7	Tubulin beta-8 chain	3	3	2	3	4	4	2	3	3	3	4	3	104998000	27711500	24441900	80943800	115816900	46523900	86967100	18384900	85629000	53576000	23608000	75065000
Q4V348;P0CG24;P58317;P17036;P17023;Q86W11;Q96NJ6;Q9HBT8;Q8NF99;Q6ZMS4;P15622;Q8N883;P17027;Q5MCW4;Q9P0L1;Q5TYW1	Zinc finger protein 658B;Zinc finger protein 883;Zinc finger protein 121;Zinc finger protein 3;Zinc finger protein 19;Zinc finger and SCAN domain-containing protein 30;Zinc finger protein 3 homolog;Zinc finger protein 286A;Zinc finger protein 397;Zinc finger protein 852;Zinc finger protein 250;Zinc finger protein 614;Zinc finger protein 23;Zinc finger protein 569;Zinc finger protein with KRAB and…	0	0	0	0	0	0	0	0	0	0	0	0	0	0	0	0	0	0	0	0	0	0	0	0
Q569G3	Uncharacterized protein C5orf47	1	1	1	1	1	1	1	1	1	1	0	1	17555000	11064000	6066600	6757600	31341000	10579000	0	1168800	23780000	21013000	5807200	20544000
Q5SW79	Centrosomal protein of 170 kDa	0	0	0	0	0	0	0	0	0	0	0	0	0	0	0	0	0	0	0	0	0	0	0	0
Q5T890	DNA excision repair protein ERCC-6-like 2	0	0	0	0	0	0	0	0	0	0	0	0	0	0	0	0	0	0	0	0	0	0	0	0
Q6IN85;Q5MIZ7	Serine/threonine-protein phosphatase 4 regulatory subunit 3A;Serine/threonine-protein phosphatase 4 regulatory subunit 3B	1	1	1	1	1	1	1	1	1	1	1	1	4195500	756260	760790	1566600	3092700	1328100	1378100	464180	1803600	1909500	935580	2117700
Q6ZUT9	DENN domain-containing protein 5B	0	0	0	0	0	0	0	0	0	0	0	0	0	0	0	0	0	0	0	0	0	0	0	0
Q71U36;Q13748;Q6PEY2	Tubulin alpha-1A chain;Tubulin alpha-3C/D chain;Tubulin alpha-3E chain	0	0	0	0	0	0	0	0	0	0	0	0	0	0	0	0	0	0	0	0	0	0	0	0
Q7L576	Cytoplasmic FMR1-interacting protein 1	1	1	1	1	1	1	1	1	1	1	1	1	3164200	1591300	12537000	5429900	141390000	1537400	7431200	3046000	4059000	3574500	6488100	3945400
Q7Z4H3	HD domain-containing protein 2	0	0	0	0	0	0	0	0	0	0	0	0	0	0	0	0	0	0	0	0	0	0	0	0
Q8IWJ2	GRIP and coiled-coil domain-containing protein 2	0	0	0	0	0	0	0	0	0	0	0	0	0	0	0	0	0	0	0	0	0	0	0	0
Q8IWP9	Coiled-coil domain-containing protein 28A	0	0	0	0	0	0	0	0	0	0	0	0	0	0	0	0	0	0	0	0	0	0	0	0
Q8N0Z3	Spindle and centriole-associated protein 1	0	0	0	0	0	0	0	0	0	0	0	0	0	0	0	0	0	0	0	0	0	0	0	0
Q8NDH2	Coiled-coil domain-containing protein 168	0	0	0	0	0	0	0	0	0	0	0	0	0	0	0	0	0	0	0	0	0	0	0	0
Q8TBN0;Q96QF0	Guanine nucleotide exchange factor for Rab-3A;Rab-3A-interacting protein	1	1	0	1	1	0	1	1	0	0	1	0	528110	814150	0	0	961150	1013000	649780	0	0	865820	0	1251500
Q92526	T-complex protein 1 subunit zeta-2	0	0	0	0	0	0	0	0	0	0	0	0	0	0	0	0	0	0	0	0	0	0	0	0
Q92572	AP-3 complex subunit sigma-1	0	0	0	0	0	0	0	0	0	0	0	0	0	0	0	0	0	0	0	0	0	0	0	0
Q96K76	Ubiquitin carboxyl-terminal hydrolase 47	0	0	0	0	0	0	0	0	0	0	0	0	0	0	0	0	0	0	0	0	0	0	0	0
Q96KB5	Lymphokine-activated killer T-cell-originated protein kinase	0	0	0	0	0	0	0	0	0	1	1	1	0	0	0	0	0	0	8840300	2442700	17610000	0	0	0
Q96SN8	CDK5 regulatory subunit-associated protein 2	0	0	0	0	0	0	0	0	0	0	0	0	0	0	0	0	0	0	0	0	0	0	0	0
Q9BQ75	Protein CMSS1	0	0	0	0	0	0	0	0	0	0	0	0	0	0	0	0	0	0	0	0	0	0	0	0
Q9BRK5	45 kDa calcium-binding protein	1	0	0	1	0	0	1	0	0	2	0	0	1400700	0	0	0	0	702620	0	0	2593900	967680	0	0
Q9BRX2	Protein pelota homolog	0	0	0	0	0	0	0	0	0	0	1	0	0	0	0	0	0	0	1613200	0	0	0	0	0
Q9BUJ2	Heterogeneous nuclear ribonucleoprotein U-like protein 1	1	2	0	1	1	1	1	1	1	1	1	0	1791100	1423740	0	1260200	2151600	667420	809710	0	911330	748940	679330	1566000
Q9BW62	Katanin p60 ATPase-containing subunit A-like 1	0	0	0	0	0	0	0	0	0	1	1	1	0	0	0	0	0	0	14725000	1753700	11895000	0	0	0
Q9GZM8	Nuclear distribution protein nudE-like 1	0	0	0	0	0	0	0	0	0	0	0	0	0	0	0	0	0	0	0	0	0	0	0	0
Q9H000;Q9UHC7	Probable E3 ubiquitin-protein ligase makorin-2;E3 ubiquitin-protein ligase makorin-1	0	0	0	0	0	0	0	0	0	0	0	0	0	0	0	0	0	0	0	0	0	0	0	0
Q9H2M9	Rab3 GTPase-activating protein non-catalytic subunit	1	0	0	0	0	1	0	0	1	1	0	1	1158000	0	0	4503700	0	0	0	2424600	5352200	0	2427200	0
Q9H2U1	ATP-dependent RNA helicase DHX36	1	1	1	1	1	1	1	1	1	1	0	0	1470500	421650	633640	376160	1089900	549000	0	0	844280	1074000	402780	875240
Q9H9Q2	COP9 signalosome complex subunit 7b	1	1	1	1	1	1	1	1	1	1	1	1	3864200	1696800	988350	1464600	4151700	1448900	1419700	691280	3110400	2112100	853850	2857600
Q9HCN8	Stromal cell-derived factor 2-like protein 1	2	1	1	1	2	1	1	2	1	2	2	1	4379200	934560	1588400	3942100	5080080	1535300	4623530	1286400	6409100	2595200	1666400	3571870
Q9NUQ3	Gamma-taxilin	0	0	0	0	0	0	0	0	0	0	0	0	0	0	0	0	0	0	0	0	0	0	0	0
Q9NUU7;Q9UMR2	ATP-dependent RNA helicase DDX19A;ATP-dependent RNA helicase DDX19B	0	0	0	0	0	0	0	0	0	0	0	0	0	0	0	0	0	0	0	0	0	0	0	0
Q9NVI7;Q5T9A4	ATPase family AAA domain-containing protein 3A;ATPase family AAA domain-containing protein 3B	0	0	0	0	0	0	0	0	0	0	0	0	0	0	0	0	0	0	0	0	0	0	0	0
Q9NXR1;Q9GZM8	Nuclear distribution protein nudE homolog 1;Nuclear distribution protein nudE-like 1	0	0	0	0	0	0	0	0	0	0	0	0	0	0	0	0	0	0	0	0	0	0	0	0
Q9NXV2;Q14681	BTB/POZ domain-containing protein KCTD5;BTB/POZ domain-containing protein KCTD2	1	0	1	1	1	0	1	1	0	1	1	0	6662600	0	2172000	0	6721800	3476500	8431700	0	4972000	6597000	0	5429500
Q9NYJ8;Q8N5C8	TGF-beta-activated kinase 1 and MAP3K7-binding protein 2;TGF-beta-activated kinase 1 and MAP3K7-binding protein 3	1	1	1	1	1	1	1	1	1	1	1	0	14424000	2293000	1699900	2657800	3984700	3001900	3700800	0	3766200	5296200	2104800	2461400
Q9P225	Dynein heavy chain 2, axonemal	0	0	0	0	0	0	0	0	0	0	0	0	0	0	0	0	0	0	0	0	0	0	0	0
Q9P2E3	NFX1-type zinc finger-containing protein 1	0	0	0	0	0	0	0	0	0	0	0	0	0	0	0	0	0	0	0	0	0	0	0	0
Q9UBX3	Mitochondrial dicarboxylate carrier	1	0	0	0	1	0	0	1	0	0	0	0	580530	0	0	0	648500	0	0	0	0	0	0	578440
Q9UJS0	Calcium-binding mitochondrial carrier protein Aralar2	1	1	0	1	1	0	1	1	0	1	0	0	1891400	729720	0	0	1302400	710630	0	0	1455100	777120	0	2039400
Q9UKT4	F-box only protein 5	0	0	0	0	0	0	0	0	0	0	0	0	0	0	0	0	0	0	0	0	0	0	0	0
Q9Y2X9	Zinc finger protein 281	0	0	0	0	0	0	0	0	0	0	0	0	0	0	0	0	0	0	0	0	0	0	0	0
Q9Y399	28S ribosomal protein S2, mitochondrial	2	1	1	2	1	1	2	1	1	1	1	1	6269300	1335900	1482500	2159900	2921800	2207640	1374700	1058400	1549400	3341300	996110	649030
Q9Y3M2	Protein chibby homolog 1	0	0	0	0	0	0	0	0	0	0	0	0	0	0	0	0	0	0	0	0	0	0	0	0
Q9Y3Z3	Deoxynucleoside triphosphate triphosphohydrolase SAMHD1	0	0	0	0	0	0	0	0	0	0	0	0	0	0	0	0	0	0	0	0	0	0	0	0
Q9Y4B6	Protein VPRBP	1	0	0	0	1	0	0	1	0	1	1	0	1305900	0	0	0	3094700	0	1259600	0	1124600	0	0	762400
Q9Y4E8;P51784;Q13107	Ubiquitin carboxyl-terminal hydrolase 15;Ubiquitin carboxyl-terminal hydrolase 11;Ubiquitin carboxyl-terminal hydrolase 4	1	1	1	1	1	1	1	1	1	1	1	1	6289100	2390200	6379600	9989500	4882900	5101000	4338300	3516700	6453700	6952400	4590300	3902400
Q9Y5A9	YTH domain-containing family protein 2	1	1	1	1	1	1	1	1	1	1	1	0	2102400	598270	962130	1061400	1846300	805380	864160	0	896090	892830	477570	1221800
Q9Y5B8	Nucleoside diphosphate kinase 7	0	0	0	0	0	0	0	0	0	0	0	0	0	0	0	0	0	0	0	0	0	0	0	0
Q9Y657;Q56A73;Q9BPZ2;Q99865	Spindlin-1;Spindlin-4;Spindlin-2B;Spindlin-2A	1	1	1	1	1	1	1	1	1	1	1	1	43881000	14475000	873670	22783000	32678000	11042000	16583000	10705000	26902000	17001000	19037000	21194000
Q9Y676	28S ribosomal protein S18b, mitochondrial	2	1	0	1	1	1	1	1	1	1	2	1	3372500	1622400	0	1248700	2551600	779500	2517100	346060	1138400	1163600	727110	1826100
Q9Y678;Q9UBF2	Coatomer subunit gamma-1;Coatomer subunit gamma-2	0	0	0	0	0	0	0	0	0	1	0	0	0	0	0	0	0	0	0	0	3000300	0	0	0
P10412;P16402;Q02539;P16401;P16403	Histone H1.4;Histone H1.3;Histone H1.1;Histone H1.5;Histone H1.2	4	4	3	4	4	2	4	4	2	4	4	3	20789300	25354400	14388000	14140800	52189800	17702470	26930160	7682820	21602800	25791400	9825100	32897200
P48634	Protein PRRC2A	2	1	3	2	1	2	2	1	2	2	0	2	4141700	644220	2818270	4992700	1466300	2396010	0	1409170	2463650	2999000	1585170	1211400
P63167;Q96FJ2	Dynein light chain 1, cytoplasmic;Dynein light chain 2, cytoplasmic	3	2	1	2	1	2	2	1	2	2	2	0	5891400	1832570	1301600	4090700	3573300	1775660	4019300	0	3870300	3501290	1979010	2069800
Q13547;Q92769	Histone deacetylase 1;Histone deacetylase 2	4	1	1	3	3	2	2	2	1	2	2	0	13838700	1657900	1999900	1900980	12003000	4419900	5490190	0	6161600	4809800	2968400	6112980
Q96S55	ATPase WRNIP1	2	1	1	1	1	1	1	1	1	2	1	1	6380400	1464600	1986600	3428300	3991100	1758800	2008200	1342100	4770900	1932100	1578500	2965200
CON__P02662		1	0	0	0	0	0	0	0	0	3	0	0	682340	0	0	0	0	0	0	0	70224000	0	0	0
O75694	Nuclear pore complex protein Nup155	1	0	0	0	0	0	0	0	0	0	0	0	2270400	0	0	0	0	0	0	0	0	0	0	0
P07737;CON__P02584	Profilin-1	0	0	1	0	0	0	0	0	0	0	0	0	0	0	6517800	0	0	0	0	0	0	0	0	0
P12270	Nucleoprotein TPR	0	1	0	0	0	0	0	0	0	0	0	0	0	1153900	0	0	0	0	0	0	0	0	0	0
P12694	2-oxoisovalerate dehydrogenase subunit alpha, mitochondrial	1	0	0	0	0	0	0	0	0	0	0	0	1659600	0	0	0	0	0	0	0	0	0	0	0
P16949;Q93045	Stathmin;Stathmin-2	1	0	1	0	0	1	0	0	1	1	0	1	1014900	0	1349700	2294400	0	0	0	1081100	668990	0	1591300	0
P17066	Heat shock 70 kDa protein 6	0	1	0	0	0	0	0	0	0	0	0	0	0	480270	0	0	0	0	0	0	0	0	0	0
P26373	60S ribosomal protein L13	0	1	0	0	0	0	0	0	0	0	0	0	0	338570	0	0	0	0	0	0	0	0	0	0
P31751	RAC-beta serine/threonine-protein kinase	1	0	0	0	0	0	0	0	0	0	0	0	892530	0	0	0	0	0	0	0	0	0	0	0
P40939	Trifunctional enzyme subunit alpha, mitochondrial;Long-chain enoyl-CoA hydratase;Long chain 3-hydroxyacyl-CoA dehydrogenase	1	0	0	0	0	0	0	0	0	0	0	0	843940	0	0	0	0	0	0	0	0	0	0	0
P42771;P42772	Cyclin-dependent kinase inhibitor 2A;Cyclin-dependent kinase 4 inhibitor B	1	0	0	0	0	0	0	0	0	0	0	0	1104100	0	0	0	0	0	0	0	0	0	0	0
P46783;Q9NQ39	40S ribosomal protein S10;Putative 40S ribosomal protein S10-like	1	0	0	1	1	1	0	0	0	0	0	0	2125700	0	0	1142900	3024900	852640	0	0	0	0	0	0
P47755	F-actin-capping protein subunit alpha-2	1	0	0	0	0	0	0	0	0	0	0	0	1749800	0	0	0	0	0	0	0	0	0	0	0
P49720	Proteasome subunit beta type-3	1	0	0	1	1	1	0	0	0	0	0	0	1140800	0	0	3150000	1543900	208010	0	0	0	0	0	0
P60709;Q6S8J3;A5A3E0;P0CG38;Q9BYX7;P0CG39;P63261	Actin, cytoplasmic 1;Actin, cytoplasmic 1, N-terminally processed;POTE ankyrin domain family member E;POTE ankyrin domain family member F;POTE ankyrin domain family member I;Putative beta-actin-like protein 3;Putative beta-actin-like protein 3, N-terminally processed;POTE ankyrin domain family member J;Actin, cytoplasmic 2;Actin, cytoplasmic 2, N-terminally processed	0	0	1	0	0	0	0	0	0	0	0	0	0	0	2650700	0	0	0	0	0	0	0	0	0
P62917	60S ribosomal protein L8	0	0	1	0	0	0	0	0	0	0	0	0	0	0	340510	0	0	0	0	0	0	0	0	0
P63151;Q66LE6;Q00005	Serine/threonine-protein phosphatase 2A 55 kDa regulatory subunit B alpha isoform;Serine/threonine-protein phosphatase 2A 55 kDa regulatory subunit B delta isoform;Serine/threonine-protein phosphatase 2A 55 kDa regulatory subunit B beta isoform	1	0	0	0	0	0	0	0	0	0	0	0	2070200	0	0	0	0	0	0	0	0	0	0	0
P68104;Q05639	Elongation factor 1-alpha 1;Elongation factor 1-alpha 2	1	1	0	0	0	1	0	0	1	0	0	0	2710800	688950	0	1394900	0	0	0	0	0	0	1278000	0
Q04724;Q04727	Transducin-like enhancer protein 1;Transducin-like enhancer protein 4	0	1	0	0	0	0	0	0	0	0	0	0	0	454680	0	0	0	0	0	0	0	0	0	0
Q13155	Aminoacyl tRNA synthase complex-interacting multifunctional protein 2	1	0	0	0	0	0	0	0	0	1	0	0	416100	0	0	0	0	0	0	0	294480	0	0	0
Q13405	39S ribosomal protein L49, mitochondrial	1	0	0	0	0	0	0	0	0	0	1	0	923170	0	0	0	0	0	538520	0	0	0	0	0
Q5VT79	Annexin A8-like protein 2	0	0	1	0	0	0	0	0	0	0	0	0	0	0	51645000	0	0	0	0	0	0	0	0	0
Q6P3W7	SCY1-like protein 2	0	1	0	0	0	0	0	0	0	0	0	0	0	654790	0	0	0	0	0	0	0	0	0	0
Q6UN15	Pre-mRNA 3-end-processing factor FIP1	1	0	0	0	0	0	0	0	0	0	0	0	1274000	0	0	0	0	0	0	0	0	0	0	0
Q6UX04	Peptidyl-prolyl cis-trans isomerase CWC27 homolog	1	0	0	0	0	0	0	0	0	0	1	0	1296100	0	0	0	0	0	875240	0	0	0	0	0
Q86XP3	ATP-dependent RNA helicase DDX42	1	0	0	0	0	0	0	0	0	1	0	0	2135100	0	0	0	0	0	0	0	1026500	0	0	0
Q99878;Q96KK5;Q9BTM1;Q16777;Q6FI13;P20671;P0C0S8	Histone H2A type 1-J;Histone H2A type 1-H;Histone H2A.J;Histone H2A type 2-C;Histone H2A type 2-A;Histone H2A type 1-D;Histone H2A type 1	1	0	0	0	0	0	0	0	0	0	0	0	1678100	0	0	0	0	0	0	0	0	0	0	0
Q9BRP8	Partner of Y14 and mago	1	1	0	0	1	0	0	1	0	1	1	0	1381100	1110700	0	0	3272100	0	1334900	0	1402600	0	0	1018300
Q9H2W6	39S ribosomal protein L46, mitochondrial	1	0	0	0	0	0	0	0	0	0	0	0	1177000	0	0	0	0	0	0	0	0	0	0	0
Q9NSV4	Protein diaphanous homolog 3	1	0	0	0	0	0	0	0	0	0	0	0	700500	0	0	0	0	0	0	0	0	0	0	0
Q9NXR1	Nuclear distribution protein nudE homolog 1	0	0	1	0	0	0	0	0	0	0	0	0	0	0	3182300	0	0	0	0	0	0	0	0	0
Q9UJZ1	Stomatin-like protein 2, mitochondrial	1	0	0	0	0	0	0	0	0	0	0	0	1206000	0	0	0	0	0	0	0	0	0	0	0
Q9UPT8	Zinc finger CCCH domain-containing protein 4	1	0	0	1	1	1	0	0	0	0	0	0	1117000	0	0	199890	399520	415440	0	0	0	0	0	0
Q9Y2R9	28S ribosomal protein S7, mitochondrial	1	0	0	0	0	0	0	0	0	0	0	0	3519900	0	0	0	0	0	0	0	0	0	0	0
CON__P08779;P08779;CON__Q9Z2K1;CON__Q3ZAW8;CON__A2A4G1;CON__P19001;CON__Q14525;CON__Q9UE12;CON__Q15323;CON__A2A5Y0;CON__P05784;CON__Q92764;CON__Q14532;CON__A2AB72;CON__Q497I4;CON__O76015;CON__O76013;CON__O76014;CON__REFSEQ:XP_986630;Q14525;Q15323;Q14532;O76014;Q92764;O76015;O76013;CON__P19012;P19012;CON__P13645;P13645;CON__P02535-1;CON__Q148H6;CON__Q7Z3Y7;CON__Q2M2I5;Q7Z3Y7;Q2M2I5;CON__P02533;P02…	Keratin, type I cytoskeletal 16;Keratin, type I cuticular Ha3-II;Keratin, type I cuticular Ha1;Keratin, type I cuticular Ha2;Keratin, type I cuticular Ha7;Keratin, type I cuticular Ha5;Keratin, type I cuticular Ha8;Keratin, type I cuticular Ha6;Keratin, type I cytoskeletal 15;Keratin, type I cytoskeletal 10;Keratin, type I cytoskeletal 28;Keratin, type I cytoskeletal 24;Keratin, type I cytoskelet…	1	1	1	1	1	0	1	1	0	1	1	1	4894500	9637000	15362000	0	4995000	2808700	17631000	3679000	1330100	223460000	0	5972900
O95983;Q9UBB5	Methyl-CpG-binding domain protein 3;Methyl-CpG-binding domain protein 2	1	1	1	1	1	0	1	1	0	1	1	1	3486200	1184100	1787600	0	4819200	953240	2764400	899340	1609300	3230500	0	3842300
P25490;O15391	Transcriptional repressor protein YY1;Transcription factor YY2	1	1	1	1	1	0	1	1	0	1	1	0	2061000	672170	223810	0	1181600	337470	643460	0	1003200	492350	0	796320
P82673	28S ribosomal protein S35, mitochondrial	1	1	1	0	1	1	0	1	1	1	1	0	2795300	2743100	1776900	2807400	2728700	0	2992700	0	2391200	0	1230400	3766900
Q13283;Q9UN86	Ras GTPase-activating protein-binding protein 1;Ras GTPase-activating protein-binding protein 2	1	1	1	0	1	1	0	1	1	0	1	1	2435200	1618700	930570	1104100	3081100	0	1489100	480810	0	0	1228300	3113000
Q9Y4Y9	U6 snRNA-associated Sm-like protein LSm5	1	1	1	0	1	1	0	1	1	0	1	1	2035800	1160100	1702400	1014300	3553400	0	919730	1281300	0	0	1228100	2901100
P19105;O14950	Myosin regulatory light chain 12A;Myosin regulatory light chain 12B	2	1	2	2	1	1	2	1	1	2	2	1	13949600	6249700	7462900	13250000	17217000	7965150	12224700	2601500	11117200	9559700	9731300	7836900
P46781	40S ribosomal protein S9	3	2	2	2	3	1	2	3	1	2	2	1	7703600	2233460	1642630	1521600	8690300	2439900	3636200	1140200	3416100	3098800	1093400	6401900
P47813	Eukaryotic translation initiation factor 1A, X-chromosomal	3	3	3	2	3	3	2	3	3	3	2	2	11980300	2411560	5339900	9005100	8752300	2312110	3156120	2870500	4908330	2724780	8353400	8804400
Q8ND56	Protein LSM14 homolog A	3	3	1	2	3	1	2	3	1	3	3	1	18860600	11088500	1427900	2650200	24816200	7099300	17487400	1890700	11522300	8980300	1248600	14745000
P62318	Small nuclear ribonucleoprotein Sm D3	20	20	19	19	20	19	19	20	19	21	21	18	632049200	190780300	268158600	375713000	734084900	171016580	493263140	131613210	515643400	402393400	258705800	425511700
P35908	Keratin, type II cytoskeletal 2 epidermal	1	0	1	0	0	0	0	0	0	0	1	0	689480	0	1713000	0	0	0	4202200	0	0	0	0	0
P61244	Protein max	2	1	1	0	1	1	0	1	1	0	0	0	3678000	597770	1113200	999330	2589800	0	0	0	0	0	825680	1932100
P62136	Serine/threonine-protein phosphatase PP1-alpha catalytic subunit	2	0	0	1	1	1	0	0	0	0	1	0	3083800	0	0	1055700	1204300	728940	520810	0	0	0	0	0
P82912	28S ribosomal protein S11, mitochondrial	1	1	0	0	0	0	0	0	0	0	0	1	2153300	971440	0	0	0	0	0	972900	0	0	0	0
Q8N283	Ankyrin repeat domain-containing protein 35	0	1	1	0	0	0	0	0	0	0	0	0	0	885900	10842000	0	0	0	0	0	0	0	0	0
Q8TBN0	Guanine nucleotide exchange factor for Rab-3A	2	0	0	0	0	0	0	0	0	0	0	0	2164700	0	0	0	0	0	0	0	0	0	0	0
Q9HD33	39S ribosomal protein L47, mitochondrial	1	1	0	0	0	0	0	0	0	0	0	0	815090	773750	0	0	0	0	0	0	0	0	0	0
Q9P015	39S ribosomal protein L15, mitochondrial	1	1	0	0	0	0	0	0	0	1	0	0	1719100	983130	0	0	0	0	0	0	1069000	0	0	0
Q9Y4Z0	U6 snRNA-associated Sm-like protein LSm4	1	1	0	1	1	1	0	0	0	0	1	0	1599100	475700	0	1427600	1350700	602130	2002700	0	0	0	0	0
P28482	Mitogen-activated protein kinase 1	2	1	0	1	0	0	1	0	0	0	0	0	3016200	324530	0	0	0	1135100	0	0	0	1044100	0	0
P35908;CON__P35908;CON__Q9R0H5;CON__Q6NXH9;CON__Q3SY84;CON__Q7RTS7;CON__Q32MB2;Q3SY84;Q7RTS7;Q86Y46	Keratin, type II cytoskeletal 2 epidermal;Keratin, type II cytoskeletal 71;Keratin, type II cytoskeletal 74;Keratin, type II cytoskeletal 73	1	1	1	1	0	0	1	0	0	1	1	1	692110	400290	1744400	0	0	395390	2764300	518430	367480	281390	0	0
P52701	DNA mismatch repair protein Msh6	1	1	1	1	0	0	1	0	0	1	1	0	1549400	701580	1031200	0	0	806950	1610000	0	962070	1009000	0	0
P98179	RNA-binding protein 3	3	2	2	3	2	3	2	1	2	3	1	2	10852900	4020190	5774500	7610250	2881900	4162150	580970	2251160	8065400	6081250	3769410	1157300
Q9Y2A7	Nck-associated protein 1	2	3	2	1	2	2	1	2	2	2	2	2	5427100	1989240	1594410	1985060	3528100	373630	1674770	639570	2343460	946340	1301300	1979860
P38606	V-type proton ATPase catalytic subunit A	4	4	2	2	3	3	2	3	3	3	4	2	14158200	6809180	4224090	10862500	6817600	3382400	6093690	3565550	7820000	6065300	5491430	5298120
O43264	Centromere/kinetochore protein zw10 homolog	1	1	1	0	0	0	0	0	0	1	0	0	808990	256400	826000	0	0	0	0	0	430320	0	0	0
O94776;Q13330;Q9BTC8	Metastasis-associated protein MTA2;Metastasis-associated protein MTA1;Metastasis-associated protein MTA3	1	1	1	0	0	0	0	0	0	0	1	0	2398300	456030	328140	0	0	0	1108700	0	0	0	0	0
P60842;Q14240;P38919	Eukaryotic initiation factor 4A-I;Eukaryotic initiation factor 4A-II;Eukaryotic initiation factor 4A-II, N-terminally processed;Eukaryotic initiation factor 4A-III;Eukaryotic initiation factor 4A-III, N-terminally processed	2	2	2	2	2	2	1	1	1	2	2	1	19234800	6155100	8217400	11849200	11611200	5680300	12472600	3960500	11291300	11521000	5728100	7682500
P61221	ATP-binding cassette sub-family E member 1	4	1	1	4	4	4	1	1	1	1	3	1	4085170	252380	457090	7904120	5976150	2707680	1887340	230760	1000800	907030	771700	555780
Q5T9A4	ATPase family AAA domain-containing protein 3B	1	2	0	1	1	1	0	0	0	0	0	0	1100300	1861610	0	1478300	1960000	699090	0	0	0	0	0	0
Q8IUD2	ELKS/Rab6-interacting/CAST family member 1	0	3	0	1	1	1	0	0	0	1	0	0	0	2416830	0	1081200	1705800	824760	0	0	2383900	0	0	0
Q8WXF1	Paraspeckle component 1	3	1	1	0	1	1	0	1	1	1	3	0	8861600	772220	1123500	1128500	1712400	0	4443500	0	1609300	0	770910	1027300
Q8WUA2	Peptidyl-prolyl cis-trans isomerase-like 4	5	1	5	4	3	6	2	1	4	5	4	3	12192940	1163700	8127200	12916600	8134400	3841870	6383420	4238670	9443290	5155500	6572410	2992400
P61923	Coatomer subunit zeta-1	3	3	2	2	2	3	1	1	2	2	1	2	9253800	3542650	3191200	12370500	9833300	2387700	2447200	1839410	4607600	1767800	3117600	1940000

## Sheet: #peptidespectra
Accession	Description	<Mock>	<SNX5 Y132D_Mouse>	<SNX5 WT_Mouse>	<SNX5 F136D_Mouse>	<SNX5 WT_Mouse>	FDR<.1
P16615	Sarcoplasmic/endoplasmic reticulum calcium ATPase 2	845883	3.0773e+06	4.93158e+06	792977	4.93158e+06	ATP2A2
P11717	Cation-independent mannose-6-phosphate receptor	4572160	3.14506e+06	6.58416e+07	2665970	6.58416e+07	CI-MPR
A1XBS5	Protein FAM92A1	0	0	0	624900	0	FAM92A1
P34932	Heat shock 70 kDa protein 4	8.80109e+07	9.29751e+07	137171480	1.01492e+08	137171480	HSPA4
O95757	Heat shock 70 kDa protein 4L	1.18562e+07	1.08499e+07	10847480	1.13361e+07	10847480	HSPA4L
P17066	Heat shock 70 kDa protein 6	160090	0	0	0	0	HSPA6
P08069	Insulin-like growth factor 1 receptor;Insulin-like growth factor 1 receptor alpha chain;Insulin-like growth factor 1 receptor beta chain	0	0	3.4708e+07	0	3.4708e+07	IGF1R
Q15773	Myeloid leukemia factor 2	1.0585e+06	1.53212e+07	6.17677e+06	2.27218e+07	6.17677e+06	MLF2
Q15390	Mitochondrial fission regulator 1	0	0	0	0	0	MTFR1
O95613	Pericentrin	3.09416e+06	738704	604667	2401072	604667	PCNT
O00264	Membrane-associated progesterone receptor component 1	4.08205e+06	9412400	14660060	9.5357e+06	14660060	PGRMC1
Q9P2E9	Ribosome-binding protein 1	255237	377037	218143	283133	218143	RRBP1
Q13596	Sorting nexin-1	1248000	1.77804e+09	2.22681e+09	2.27364e+09	2.22681e+09	SNX1
O60749	Sorting nexin-2	3.62176e+06	6.05762e+09	7.40042e+09	7642561100	7.40042e+09	SNX2
Q86XE0	Sorting nexin-32	0	406067	2777000	0	2777000	SNX32
Q9Y5X3	Sorting nexin-5	2.18979e+07	13600276170	19249491620	1.5957e+10	19249491620	SNX5
Q9UNH7	Sorting nexin-6;Sorting nexin-6, N-terminally processed	5.79523e+07	1.69115e+08	1.10847e+08	317659220	1.10847e+08	SNX6
Q9UNE7	E3 ubiquitin-protein ligase CHIP	7.93499e+06	6.78765e+06	1.43589e+07	9.34751e+06	1.43589e+07	STUB1
Q8TC07	TBC1 domain family member 15	0	740467	2770920	0	2770920	TBC1D15
P51784	Ubiquitin carboxyl-terminal hydrolase 11	181420	391693	136767	914647	136767	USP11
Q9HCC0	Methylcrotonoyl-CoA carboxylase beta chain, mitochondrial	1099900	194593	1.55366e+06	1.10361e+07	1.55366e+06
O75935	Dynactin subunit 3	3074250	228147	2.05894e+06	3.93192e+06	2.05894e+06
P19474	E3 ubiquitin-protein ligase TRIM21	9.83333e+06	10899820	1.48474e+07	1.57572e+07	1.48474e+07
Q14683	Structural maintenance of chromosomes protein 1A	4.22189e+07	3.71269e+07	5.45386e+07	2.91691e+07	5.45386e+07
Q13347	Eukaryotic translation initiation factor 3 subunit I	1.46559e+08	1.96486e+08	193758280	1.58948e+08	193758280
P17812	CTP synthase 1	1701830	1674300	6.96104e+06	3539980	6.96104e+06
P62316	Small nuclear ribonucleoprotein Sm D2	197039310	2.13926e+08	2.37058e+08	180919870	2.37058e+08
P62829	60S ribosomal protein L23	6.85201e+06	7.20233e+06	1.237e+07	5.87674e+06	1.237e+07
Q9Y3F4	Serine-threonine kinase receptor-associated protein	3.85237e+06	5.97096e+06	1.01144e+07	5.16463e+06	1.01144e+07
Q07866	Kinesin light chain 1	6.69053e+06	5.05425e+06	9.75785e+06	4146580	9.75785e+06
P24534	Elongation factor 1-beta	368143190	4.00164e+08	4.15109e+08	346789360	4.15109e+08
O43175	D-3-phosphoglycerate dehydrogenase	64235020	5.24135e+07	7.49074e+07	57161540	7.49074e+07
P50990	T-complex protein 1 subunit theta	3.21777e+08	3.56172e+08	6.26607e+08	309469260	6.26607e+08
Q8IX12	Cell division cycle and apoptosis regulator protein 1	3.20581e+07	1.93746e+07	27984270	1.51027e+07	27984270
Q01804	OTU domain-containing protein 4	1.6463e+08	1.16801e+08	145828840	1.02008e+08	145828840
Q5T8P6	RNA-binding protein 26	6.06043e+06	1.02531e+06	5.62086e+06	3.36684e+06	5.62086e+06
P15586	N-acetylglucosamine-6-sulfatase	240793	0	1781000	135107	1781000
Q14157	Ubiquitin-associated protein 2-like	9.63157e+06	7496220	10359490	7.1796e+06	10359490
Q07955	Serine/arginine-rich splicing factor 1	1.63823e+06	203017	1918940	1.57532e+06	1918940
Q4VCS5	Angiomotin	6.6673e+07	8.31163e+07	1.1262e+08	6.93761e+07	1.1262e+08
P61981	14-3-3 protein gamma;14-3-3 protein gamma, N-terminally processed	4.12852e+06	3.44235e+06	7.44502e+06	4.13788e+06	7.44502e+06
P62081	40S ribosomal protein S7	9.50538e+06	7.23993e+06	10755740	6.20121e+06	10755740
Q14839;Q8TDI0	Chromodomain-helicase-DNA-binding protein 4;Chromodomain-helicase-DNA-binding protein 5	5869610	4424700	6.79622e+06	4.13302e+06	6.79622e+06
O00231	26S proteasome non-ATPase regulatory subunit 11	3.86701e+07	4.47327e+07	63587840	3.49854e+07	63587840
P11142	Heat shock cognate 71 kDa protein	381784590	4.59365e+08	563300550	4.56281e+08	563300550
Q9NWU2	Glucose-induced degradation protein 8 homolog	186290	1.92884e+06	264067	266697	264067
P62266	40S ribosomal protein S23	2836170	3.55842e+06	2.47312e+06	2.85974e+06	2.47312e+06
Q07065	Cytoskeleton-associated protein 4	2.35042e+06	5.28326e+06	3.64586e+06	1.66873e+06	3.64586e+06
P23526	Adenosylhomocysteinase	2.614e+06	3.40181e+06	7.43145e+06	4.41579e+06	7.43145e+06
O95218	Zinc finger Ran-binding domain-containing protein 2	4.3054e+07	4.22782e+07	5.37515e+07	40361370	5.37515e+07
P07919	Cytochrome b-c1 complex subunit 6, mitochondrial	963633	2.28033e+06	5.61957e+06	3.29111e+06	5.61957e+06
P62750	60S ribosomal protein L23a	12928270	1.23343e+07	1.39092e+07	9666760	1.39092e+07
Q86X55	Histone-arginine methyltransferase CARM1	821067	827067	2220680	2.69833e+06	2220680
Q9Y5K5	Ubiquitin carboxyl-terminal hydrolase isozyme L5	2.23535e+06	1467400	4202290	2.42623e+06	4202290
O43809	Cleavage and polyadenylation specificity factor subunit 5	9.25133e+06	5.59047e+06	8923000	6703100	8923000
O95400	CD2 antigen cytoplasmic tail-binding protein 2	8.39178e+06	7465900	1.06727e+07	7.43657e+06	1.06727e+07
P51610	Host cell factor 1;HCF N-terminal chain 1;HCF N-terminal chain 2;HCF N-terminal chain 3;HCF N-terminal chain 4;HCF N-terminal chain 5;HCF N-terminal chain 6;HCF C-terminal chain 1;HCF C-terminal chain 2;HCF C-terminal chain 3;HCF C-terminal chain 4;HCF C-terminal chain 5;HCF C-terminal chain 6	4.5108e+06	2847240	6.98753e+06	1534300	6.98753e+06
P36776	Lon protease homolog, mitochondrial	2.51506e+06	1154910	2.90356e+06	1426680	2.90356e+06
P22234	Multifunctional protein ADE2;Phosphoribosylaminoimidazole-succinocarboxamide synthase;Phosphoribosylaminoimidazole carboxylase	72167110	5.29929e+07	7.88442e+07	52605230	7.88442e+07
Q66PJ3	ADP-ribosylation factor-like protein 6-interacting protein 4	1.64832e+06	342167	4.35747e+06	602323	4.35747e+06
Q7L2J0	7SK snRNA methylphosphate capping enzyme	4097320	2.34825e+06	4.78489e+06	2.59924e+06	4.78489e+06
P09651	Heterogeneous nuclear ribonucleoprotein A1;Heterogeneous nuclear ribonucleoprotein A1, N-terminally processed	1.48814e+07	9.24461e+06	1.38522e+07	9824300	1.38522e+07
Q9H7D7	WD repeat-containing protein 26	2.68465e+06	1.71007e+06	4.37617e+06	3870330	4.37617e+06
P14866	Heterogeneous nuclear ribonucleoprotein L	4.05007e+06	3.58173e+06	3.6831e+06	2824610	3.6831e+06
P26641	Elongation factor 1-gamma	718711160	661362700	764626360	5.35433e+08	764626360
Q8WWY3	U4/U6 small nuclear ribonucleoprotein Prp31	227015090	1.78053e+08	200619490	1.43883e+08	200619490
P35580	Myosin-10	1.45759e+08	1.51195e+08	193925810	1.2396e+08	193925810
P21333	Filamin-A	4.58705e+08	490695610	5.30693e+08	3.53099e+08	5.30693e+08
P53396	ATP-citrate synthase	6.09901e+07	5.45103e+07	1.06119e+08	5.85202e+07	1.06119e+08
P68400;Q8NEV1	Casein kinase II subunit alpha;Casein kinase II subunit alpha 3	14140720	15762490	2.26291e+07	1.31335e+07	2.26291e+07
P55209	Nucleosome assembly protein 1-like 1	1.59742e+07	1.29936e+07	2.19573e+07	16868320	2.19573e+07
P11021	78 kDa glucose-regulated protein	1.83163e+08	2.3093e+08	2.61156e+08	2.2008e+08	2.61156e+08
Q9BQA1	Methylosome protein 50	3.67324e+09	4.54156e+09	4538561930	3.84482e+09	4538561930
P55884	Eukaryotic translation initiation factor 3 subunit B	108603510	1.03739e+08	1.24355e+08	81431450	1.24355e+08
P23381	Tryptophan--tRNA ligase, cytoplasmic;T1-TrpRS;T2-TrpRS	16825690	17426380	1.28686e+07	1.18825e+07	1.28686e+07
Q15084	Protein disulfide-isomerase A6	10102170	8.49048e+06	1.33186e+07	1.02216e+07	1.33186e+07
P04350;P68371	Tubulin beta-4A chain;Tubulin beta-4B chain	164650270	1.78343e+08	2.60576e+08	1.42766e+08	2.60576e+08
P20618	Proteasome subunit beta type-1	22185400	19732200	3.06899e+07	1.86903e+07	3.06899e+07
Q9NVA2	Septin-11	1.10696e+07	1.14562e+07	2.14528e+07	1.04224e+07	2.14528e+07
Q15276	Rab GTPase-binding effector protein 1	5.13234e+06	2164260	5.79138e+06	3301360	5.79138e+06
O14654	Insulin receptor substrate 4	5.09972e+06	4.21181e+06	2.4388e+07	8.18735e+06	2.4388e+07
P17987	T-complex protein 1 subunit alpha	1.5533e+08	164821160	290964520	1.59689e+08	290964520
P25398	40S ribosomal protein S12	57989320	92107680	489371313	263737840	489371313
O43318	Mitogen-activated protein kinase kinase kinase 7	4.06868e+08	333505960	402358240	3.43204e+08	402358240
P09651;Q32P51	Heterogeneous nuclear ribonucleoprotein A1;Heterogeneous nuclear ribonucleoprotein A1, N-terminally processed;Heterogeneous nuclear ribonucleoprotein A1-like 2	11366060	1.53603e+07	9052790	12764250	9052790
Q92598	Heat shock protein 105 kDa	4.53734e+07	53196720	71877650	5.38859e+07	71877650
O94776	Metastasis-associated protein MTA2	24756700	1.77302e+07	2.3745e+07	13041330	2.3745e+07
Q15029	116 kDa U5 small nuclear ribonucleoprotein component	3.47248e+07	3.2242e+07	4.62442e+07	34277760	4.62442e+07
Q7Z6Z7	E3 ubiquitin-protein ligase HUWE1	48344040	41967630	6.53894e+07	4.0756e+07	6.53894e+07
Q14766	Latent-transforming growth factor beta-binding protein 1	14453850	1.35817e+07	2.16622e+07	1.42713e+07	2.16622e+07
Q6P2Q9	Pre-mRNA-processing-splicing factor 8	34287640	2.68193e+07	4.30664e+07	2.50477e+07	4.30664e+07
P40222	Alpha-taxilin	1.94169e+06	3.33639e+06	8.69862e+06	3525020	8.69862e+06
Q13200	26S proteasome non-ATPase regulatory subunit 2	28301860	3.3908e+07	61728870	3.32674e+07	61728870
P31943	Heterogeneous nuclear ribonucleoprotein H;Heterogeneous nuclear ribonucleoprotein H, N-terminally processed	133016240	1.45906e+08	1.39294e+08	1.34123e+08	1.39294e+08
P15104	Glutamine synthetase	1.04713e+07	1.7685e+07	16580670	8.80441e+06	16580670
Q14978	Nucleolar and coiled-body phosphoprotein 1	1.72291e+06	1549650	2.79256e+06	1724930	2.79256e+06
Q14974	Importin subunit beta-1	6.52981e+06	4.01575e+06	12389590	4861790	12389590
O95983	Methyl-CpG-binding domain protein 3	7.88834e+06	4.55951e+06	4.66689e+06	5807684	4.66689e+06
O00203	AP-3 complex subunit beta-1	1.11182e+06	354433	3.12887e+06	520133	3.12887e+06
P62249	40S ribosomal protein S16	1.14526e+07	7663120	1.28704e+07	7.67262e+06	1.28704e+07
Q9Y2J2	Band 4.1-like protein 3;Band 4.1-like protein 3, N-terminally processed	1.3849e+07	6993300	9.6325e+06	7.0763e+06	9.6325e+06
Q00839	Heterogeneous nuclear ribonucleoprotein U	102647800	7.41915e+07	1.00209e+08	63602300	1.00209e+08
P33176	Kinesin-1 heavy chain	4.62672e+07	33274630	4.6921e+07	30114450	4.6921e+07
P08670	Vimentin	74264200	57059680	8.89861e+07	5.54188e+07	8.89861e+07
Q99832	T-complex protein 1 subunit eta	1.5478e+08	1.7865e+08	3.50143e+08	1.6418e+08	3.50143e+08
P40227	T-complex protein 1 subunit zeta	163950790	1.88376e+08	2.96119e+08	1.67342e+08	2.96119e+08
O75533	Splicing factor 3B subunit 1	39259230	34463590	4.73636e+07	2.98734e+07	4.73636e+07
O75688	Protein phosphatase 1B	4609960370	3.53132e+09	4859483770	4.25436e+09	4859483770
P33993	DNA replication licensing factor MCM7	3.546e+07	27403830	4.29721e+07	2.98233e+07	4.29721e+07
P23458	Tyrosine-protein kinase JAK1	5.78486e+07	5.63788e+07	64286580	59330430	64286580
P07737	Profilin-1	3.46727e+06	5.2072e+06	13888200	7.56904e+06	13888200
P49368	T-complex protein 1 subunit gamma	3.57209e+08	3.42664e+08	563015930	2.82242e+08	563015930
P04843	Dolichyl-diphosphooligosaccharide--protein glycosyltransferase subunit 1	5529810	7.38634e+06	7849830	5796950	7849830
P05023;P13637;P50993	Sodium/potassium-transporting ATPase subunit alpha-1;Sodium/potassium-transporting ATPase subunit alpha-3;Sodium/potassium-transporting ATPase subunit alpha-2	2.06983e+06	1.51038e+06	1.40267e+06	331597	1.40267e+06
P62857	40S ribosomal protein S28	3.38376e+07	3.2491e+07	3.84002e+07	2.25794e+07	3.84002e+07
Q8N5C8	TGF-beta-activated kinase 1 and MAP3K7-binding protein 3	1.73928e+08	122278490	131405220	1.15394e+08	131405220
Q9UBQ5	Eukaryotic translation initiation factor 3 subunit K	22685610	2.39608e+07	2.92975e+07	1.8231e+07	2.92975e+07
O94776;Q13330	Metastasis-associated protein MTA2;Metastasis-associated protein MTA1	467167	3.85857e+06	2888200	1.83873e+06	2888200
P35244	Replication protein A 14 kDa subunit	490833	2488560	1.98563e+06	1605200	1.98563e+06
Q00059	Transcription factor A, mitochondrial	294023	1.79225e+07	254090	1.67267e+06	254090
Q16576;Q09028	Histone-binding protein RBBP7;Histone-binding protein RBBP4	2.34443e+07	2.10554e+07	2.7039e+07	1.80638e+07	2.7039e+07
Q8WXI9	Transcriptional repressor p66-beta	1.07309e+06	1.78944e+06	1461860	1.00577e+06	1461860
P30566	Adenylosuccinate lyase	1.33638e+06	1941810	1.81283e+06	818963	1.81283e+06
Q8WXI9;Q86YP4	Transcriptional repressor p66-beta;Transcriptional repressor p66-alpha	1.30007e+06	3.38583e+06	2264000	1017400	2264000
P41567;O60739	Eukaryotic translation initiation factor 1;Eukaryotic translation initiation factor 1b	950883	1.41073e+06	1.12983e+06	0	1.12983e+06
P49006	MARCKS-related protein	1.01747e+06	882900	398533	799460	398533
P68400	Casein kinase II subunit alpha	1.70963e+06	2.14626e+06	3299210	2.33777e+06	3299210
Q8WUW1	Protein BRICK1	1099300	869793	1.64675e+06	290157	1.64675e+06
O95248	Myotubularin-related protein 5	0	430067	1.67152e+06	358267	1.67152e+06
P15311;P26038;P35241	Ezrin;Moesin;Radixin	0	419200	1.00501e+06	0	1.00501e+06
Q01105;P0DME0	Protein SET;Protein SETSIP	0	1.05557e+06	3.58803e+06	892433	3.58803e+06
Q16720	Plasma membrane calcium-transporting ATPase 3	3.89265e+06	6.10399e+06	1.02272e+07	6.73315e+06	1.02272e+07
Q96I25	Splicing factor 45	3104820	2.63057e+06	4944900	3.39552e+06	4944900
Q9UNF1	Melanoma-associated antigen D2	2690040	3.02679e+06	4185390	3.19781e+06	4185390
O75348	V-type proton ATPase subunit G 1	603700	203103	1327400	976460	1327400
P04264;CON__P04264;P04259	Keratin, type II cytoskeletal 1;Keratin, type II cytoskeletal 6B	1.16852e+07	9.35013e+06	2.10193e+06	2.28853e+07	2.10193e+06
P08133	Annexin A6	354900	1390800	1897040	171660	1897040
P11021;P11142;P54652;P34931	78 kDa glucose-regulated protein;Heat shock cognate 71 kDa protein;Heat shock-related 70 kDa protein 2;Heat shock 70 kDa protein 1-like	5.50465e+06	6.92603e+06	7.05857e+06	4.55983e+06	7.05857e+06
P14868	Aspartate--tRNA ligase, cytoplasmic	3.36253e+06	3.35053e+06	6.09147e+06	3.61828e+06	6.09147e+06
P51148	Ras-related protein Rab-5C	77860	233863	913183	592340	913183
P55786	Puromycin-sensitive aminopeptidase	251517	654633	1234470	988470	1234470
P61254	60S ribosomal protein L26	2.55565e+06	2.73924e+06	2056100	861510	2056100
Q07666	KH domain-containing, RNA-binding, signal transduction-associated protein 1	5697700	5.78183e+06	1578300	2546400	1578300
Q13409	Cytoplasmic dynein 1 intermediate chain 2	903887	1.40312e+06	3789590	1.49273e+06	3789590
Q15003	Condensin complex subunit 2	634500	197873	1383860	937307	1383860
Q96EY7	Pentatricopeptide repeat domain-containing protein 3, mitochondrial	2.46477e+06	1.3874e+06	1.05091e+06	687707	1.05091e+06
Q9C0C4	Semaphorin-4C	0	0	3.30313e+06	0	3.30313e+06
CON__P02769;CON__P02768-1;P02768	Serum albumin	6.43923e+06	8.17867e+06	3.15327e+06	3546800	3.15327e+06
O75348;O95670	V-type proton ATPase subunit G 1;V-type proton ATPase subunit G 2	2207250	1532100	366800	2136860	366800
P19784	Casein kinase II subunit alpha	2.05443e+06	1.47447e+06	1.81275e+06	1.88606e+06	1.81275e+06
P52815	39S ribosomal protein L12, mitochondrial	3.45392e+06	3.06323e+06	7548770	3.1784e+06	7548770
P62308;A8MWD9	Small nuclear ribonucleoprotein G;Putative small nuclear ribonucleoprotein G-like protein 15	17004500	20893100	16475630	1.55712e+07	16475630
P62701	40S ribosomal protein S4, X isoform	3.06153e+06	1.81687e+06	3454600	1328160	3454600
C9JLW8	Protein FAM195B	715960	202457	828093	592480	828093
O60684;O15131;P52294	Importin subunit alpha-7;Importin subunit alpha-6;Importin subunit alpha-5;Importin subunit alpha-5, N-terminally processed	214880	474933	1.30944e+06	375667	1.30944e+06
Q13148	TAR DNA-binding protein 43	701937	198240	623197	376547	623197
Q13185;P83916	Chromobox protein homolog 3;Chromobox protein homolog 1	958347	960467	843223	889833	843223
Q58FG1	Putative heat shock protein HSP 90-alpha A4	1749300	476933	2.01103e+06	135743	2.01103e+06
Q99878;Q96KK5;Q9BTM1;Q16777;Q6FI13;P20671;P0C0S8;Q71UI9;P0C0S5;Q93077;Q8IUE6;Q7L7L0;P04908;Q96QV6;P16104	Histone H2A type 1-J;Histone H2A type 1-H;Histone H2A.J;Histone H2A type 2-C;Histone H2A type 2-A;Histone H2A type 1-D;Histone H2A type 1;Histone H2A.V;Histone H2A.Z;Histone H2A type 1-C;Histone H2A type 2-B;Histone H2A type 3;Histone H2A type 1-B/E;Histone H2A type 1-A;Histone H2AX	1275160	238000	1675700	236710	1675700
Q9C005	Protein dpy-30 homolog	1.09189e+06	121487	677473	570977	677473
Q15365;Q15366;P57721	Poly(rC)-binding protein 1;Poly(rC)-binding protein 2;Poly(rC)-binding protein 3	2327800	1.55153e+06	4817920	1.92703e+06	4817920
P49915	GMP synthase [glutamine-hydrolyzing]	899073	977710	4.28909e+06	767527	4.28909e+06
P52907;P47755	F-actin-capping protein subunit alpha-1;F-actin-capping protein subunit alpha-2	4.02413e+06	4.48003e+06	5.29918e+06	2.85057e+06	5.29918e+06
P68371;Q13885;Q9BVA1	Tubulin beta-4B chain;Tubulin beta-2A chain;Tubulin beta-2B chain	10825910	1.39445e+07	2.43742e+07	1.54867e+07	2.43742e+07
P82930	28S ribosomal protein S34, mitochondrial	4.74606e+06	4.3775e+06	1814610	810633	1814610
Q8N4Q1	Mitochondrial intermembrane space import and assembly protein 40	5159230	3818340	2593530	3.37656e+06	2593530
Q13330;Q9BTC8	Metastasis-associated protein MTA1;Metastasis-associated protein MTA3	2939910	1.42943e+06	623767	378967	623767
Q13557;Q9UQM7;Q13554	Calcium/calmodulin-dependent protein kinase type II subunit delta;Calcium/calmodulin-dependent protein kinase type II subunit alpha;Calcium/calmodulin-dependent protein kinase type II subunit beta	1.14376e+06	352133	1.08317e+06	1111400	1.08317e+06
Q14766;Q9NS15	Latent-transforming growth factor beta-binding protein 1;Latent-transforming growth factor beta-binding protein 3	1.59438e+06	431367	2.01283e+06	598200	2.01283e+06
Q15057;Q96P50	Arf-GAP with coiled-coil, ANK repeat and PH domain-containing protein 2;Arf-GAP with coiled-coil, ANK repeat and PH domain-containing protein 3	6817840	4.88595e+06	8.06191e+06	5.48877e+06	8.06191e+06
Q8N7H5	RNA polymerase II-associated factor 1 homolog	1.09223e+06	298223	1.20837e+06	1.57867e+06	1.20837e+06
Q92783	Signal transducing adapter molecule 1	786200	149500	637837	480977	637837
Q9BTE1	Dynactin subunit 5	1535580	516733	2024060	0	2024060
Q9NR28	Diablo homolog, mitochondrial	4.21233e+06	3099200	3.30781e+06	3.22297e+06	3.30781e+06
P60866	40S ribosomal protein S20	3.14785e+07	12056890	5.63675e+07	8.71325e+06	5.63675e+07
O75369	Filamin-B	23090480	2.0489e+07	3.00537e+07	1.64518e+07	3.00537e+07
P11586	C-1-tetrahydrofolate synthase, cytoplasmic;Methylenetetrahydrofolate dehydrogenase;Methenyltetrahydrofolate cyclohydrolase;Formyltetrahydrofolate synthetase;C-1-tetrahydrofolate synthase, cytoplasmic, N-terminally processed	9.32342e+06	3.8036e+06	6.75637e+06	5747450	6.75637e+06
O95831	Apoptosis-inducing factor 1, mitochondrial	14825400	1.1402e+07	16324240	10429500	16324240
Q5VTR2	E3 ubiquitin-protein ligase BRE1A	4.62194e+06	1949360	3.18556e+06	3601030	3.18556e+06
P35908;CON__P35908	Keratin, type II cytoskeletal 2 epidermal	4.19174e+07	1.50047e+06	9077640	7.36581e+07	9077640
Q9Y5X3;Q9UNH7	Sorting nexin-5;Sorting nexin-6;Sorting nexin-6, N-terminally processed	0	4.72024e+07	62562910	52644740	62562910
P04080	Cystatin-B	981667	2.70717e+06	663470	907267	663470
P04350;P68371;A6NNZ2;Q9H4B7;P07437;Q13885;Q9BVA1;Q9BUF5;Q3ZCM7	Tubulin beta-4A chain;Tubulin beta-4B chain;Tubulin beta-8 chain-like protein LOC260334;Tubulin beta-1 chain;Tubulin beta chain;Tubulin beta-2A chain;Tubulin beta-2B chain;Tubulin beta-6 chain;Tubulin beta-8 chain	26434900	2.47557e+07	4.47951e+07	2.66053e+07	4.47951e+07
CON__P08779;P08779;CON__Q9Z2K1;CON__Q3ZAW8;CON__A2A4G1;CON__P19001;CON__P35900;CON__Q9D312;P35900;CON__Q8N1A0;Q8N1A0;CON__P19012;P19012;CON__P02533;P02533;CON__Q6IFX2;CON__Q61782;CON__Q04695;Q04695	Keratin, type I cytoskeletal 16;Keratin, type I cytoskeletal 20;Keratin-like protein KRT222;Keratin, type I cytoskeletal 15;Keratin, type I cytoskeletal 14;Keratin, type I cytoskeletal 17	0	1.25297e+06	0	0	0
P00403	Cytochrome c oxidase subunit 2	0	876460	0	0	0
Q8WWR9	Pancreatic progenitor cell differentiation and proliferation factor-like protein	0	4.41787e+06	0	3.82253e+06	0
Q96A33	Coiled-coil domain-containing protein 47	0	1052900	0	0	0
Q9NVS9	Pyridoxine-5-phosphate oxidase	1.13317e+07	1.04004e+07	8374820	7456840	8374820
P60842;Q14240	Eukaryotic initiation factor 4A-I;Eukaryotic initiation factor 4A-II;Eukaryotic initiation factor 4A-II, N-terminally processed	5332730	9.50087e+06	7.29093e+06	6.39592e+06	7.29093e+06
P11940	Polyadenylate-binding protein 1	251713	610937	0	0	0
P32969	60S ribosomal protein L9	726533	530563	0	1084120	0
P62873	Guanine nucleotide-binding protein G(I)/G(S)/G(T) subunit beta-1	718200	829967	0	0	0
Q7L5D6	Golgi to ER traffic protein 4 homolog	240533	543427	0	0	0
O14979	Heterogeneous nuclear ribonucleoprotein D-like	1.80673e+06	2.12133e+06	1631900	1.69667e+06	1631900
CON__P13645;P13645;CON__P02535-1;CON__Q2M2I5;Q2M2I5	Keratin, type I cytoskeletal 10;Keratin, type I cytoskeletal 24	895467	1.50377e+06	0	0	0
O00571;O15523;Q9NQI0	ATP-dependent RNA helicase DDX3X;ATP-dependent RNA helicase DDX3Y;Probable ATP-dependent RNA helicase DDX4	1.92067e+06	2087700	0	0	0
O95202	LETM1 and EF-hand domain-containing protein 1, mitochondrial	0	0	1.20663e+06	0	1.20663e+06
P04264;CON__P04264;P35908;CON__P35908	Keratin, type II cytoskeletal 1;Keratin, type II cytoskeletal 2 epidermal	1631400	2.58077e+06	0	9784900	0
P05023;P13637	Sodium/potassium-transporting ATPase subunit alpha-1;Sodium/potassium-transporting ATPase subunit alpha-3	1.36003e+06	1035200	1.96883e+06	1.60815e+06	1.96883e+06
P08047	Transcription factor Sp1	942323	716717	0	683843	0
P08069;P06213	Insulin-like growth factor 1 receptor;Insulin-like growth factor 1 receptor alpha chain;Insulin-like growth factor 1 receptor beta chain;Insulin receptor;Insulin receptor subunit alpha;Insulin receptor subunit beta	0	0	1.02623e+06	0	1.02623e+06
P13861	cAMP-dependent protein kinase type II-alpha regulatory subunit	0	0	300010	0	300010
P60981	Destrin	2831400	3684400	6202150	3.35585e+06	6202150
P62851	40S ribosomal protein S25	603963	565117	1.84672e+06	382263	1.84672e+06
Q01082	Spectrin beta chain, non-erythrocytic 1	796850	408060	799593	120833	799593
Q96AE4;Q96I24	Far upstream element-binding protein 1;Far upstream element-binding protein 3	571927	318367	0	101593	0
Q9BV86	N-terminal Xaa-Pro-Lys N-methyltransferase 1;N-terminal Xaa-Pro-Lys N-methyltransferase 1, N-terminally processed	0	0	791800	515857	791800
Q9NTG1	Polycystic kidney disease and receptor for egg jelly-related protein	1182500	1.64173e+06	0	1091100	0
Q9NWV8	BRISC and BRCA1-A complex member 1	492043	383087	995473	881070	995473
Q8IWS0	PHD finger protein 6	1452500	1130860	1989440	1490970	1989440
O94906	Pre-mRNA-processing factor 6	240203	0	1.30585e+06	319960	1.30585e+06
Q15751	Probable E3 ubiquitin-protein ligase HERC1	5.19533e+06	0	1.06267e+07	3.47933e+06	1.06267e+07
Q6UXN9	WD repeat-containing protein 82	453700	0	813583	0	813583
Q9HCN4	GPN-loop GTPase 1	3.32397e+06	0	1.41352e+07	5.22033e+06	1.41352e+07
Q9NZL4	Hsp70-binding protein 1	2071150	273750	0	0	0
Q5T5U3	Rho GTPase-activating protein 21	6.30243e+06	3.02696e+06	5.58616e+06	3.58482e+06	5.58616e+06
P11940;Q9H361	Polyadenylate-binding protein 1;Polyadenylate-binding protein 3	3.7199e+06	3105310	4.8597e+06	3.03205e+06	4.8597e+06
Q9Y2Q9	28S ribosomal protein S28, mitochondrial	6.86406e+06	5136080	8.27416e+06	3.87568e+06	8.27416e+06
O14639	Actin-binding LIM protein 1	2669700	654210	0	666567	0
O76094	Signal recognition particle subunit SRP72	1.87269e+06	454627	1.23808e+06	345620	1.23808e+06
P08238;Q58FF7;P07900;Q58FG0	Heat shock protein HSP 90-beta;Putative heat shock protein HSP 90-beta-3;Heat shock protein HSP 90-alpha;Putative heat shock protein HSP 90-alpha A5	924700	0	777533	0	777533
P35222	Catenin beta-1	1057200	0	822667	688657	822667
P68371;A6NNZ2;Q9H4B7;P07437;Q13885;Q9BVA1;Q3ZCM7	Tubulin beta-4B chain;Tubulin beta-8 chain-like protein LOC260334;Tubulin beta-1 chain;Tubulin beta chain;Tubulin beta-2A chain;Tubulin beta-2B chain;Tubulin beta-8 chain	1.45323e+06	0	4.28167e+06	0	4.28167e+06
Q96AG4	Leucine-rich repeat-containing protein 59	864773	0	2.70183e+06	1126540	2.70183e+06
Q96PU8	Protein quaking	442047	0	270747	0	270747
Q96QK1	Vacuolar protein sorting-associated protein 35	863243	0	839180	110487	839180
Q99996	A-kinase anchor protein 9	683353	0	1.65133e+06	740767	1.65133e+06
O60216	Double-strand-break repair protein rad21 homolog	2.87956e+06	3.09614e+06	5.2578e+06	3.21507e+06	5.2578e+06
P07900;Q14568	Heat shock protein HSP 90-alpha;Heat shock protein HSP 90-alpha A2	3350600	0	1455100	0	1455100
P09234	U1 small nuclear ribonucleoprotein C	4.14547e+06	3.55503e+06	3.65107e+06	2568180	3.65107e+06
O60271	C-Jun-amino-terminal kinase-interacting protein 4	9.16045e+06	5933300	8626860	5.05176e+06	8626860
O60841	Eukaryotic translation initiation factor 5B	4167140	886867	2.59724e+06	2.8899e+06	2.59724e+06
Q9Y5B9	FACT complex subunit SPT16	3.31707e+07	21046600	24735700	2.02095e+07	24735700
Q9BWU0	Kanadaptin	8.40483e+06	5822800	7493930	5.28637e+06	7493930
Q15365	Poly(rC)-binding protein 1	3.82528e+06	3.00863e+06	6586900	1.15996e+06	6586900
P68104;Q5VTE0	Elongation factor 1-alpha 1;Putative elongation factor 1-alpha-like 3	1.64349e+08	1.45453e+08	2.05805e+08	1.34561e+08	2.05805e+08
Q14204	Cytoplasmic dynein 1 heavy chain 1	7.78377e+06	4550000	1.15557e+07	7.0406e+06	1.15557e+07
P35527;CON__P35527	Keratin, type I cytoskeletal 9	2.64402e+08	41597070	3.47367e+07	629555650	3.47367e+07
P48444	Coatomer subunit delta	2.72452e+07	25690230	3.62943e+07	2.09307e+07	3.62943e+07
P53618	Coatomer subunit beta	1.42983e+07	1.31636e+07	2.16567e+07	12791930	2.16567e+07
P35998	26S protease regulatory subunit 7	5.19915e+07	4.99879e+07	81355360	4.91352e+07	81355360
P25705	ATP synthase subunit alpha, mitochondrial	51758090	4.34652e+07	53422830	3.40718e+07	53422830
P62191	26S protease regulatory subunit 4	2.7352e+07	2.96653e+07	4.13347e+07	2.39834e+07	4.13347e+07
P12956	X-ray repair cross-complementing protein 6	6.64091e+07	66639780	6.91081e+07	40539240	6.91081e+07
P15880	40S ribosomal protein S2	1.38924e+07	1.21243e+07	1.79055e+07	13180670	1.79055e+07
Q14008	Cytoskeleton-associated protein 5	2.89371e+07	23418280	4.04332e+07	20339700	4.04332e+07
Q7KZF4	Staphylococcal nuclease domain-containing protein 1	6.53622e+06	5.3034e+06	7.70094e+06	5.00046e+06	7.70094e+06
Q9Y2L1	Exosome complex exonuclease RRP44	2630930	750797	2.58176e+06	1409030	2.58176e+06
P62269	40S ribosomal protein S18	10157870	4715350	8146820	3672110	8146820
P30153	Serine/threonine-protein phosphatase 2A 65 kDa regulatory subunit A alpha isoform	1.965e+07	2.22569e+07	22127900	19738670	22127900
Q14697	Neutral alpha-glucosidase AB	3.32908e+07	2.76608e+07	3.5867e+07	32281720	3.5867e+07
O75643	U5 small nuclear ribonucleoprotein 200 kDa helicase	4.81349e+07	64518010	8.50134e+07	53966500	8.50134e+07
P49902	Cytosolic purine 5-nucleotidase	3.65265e+07	2.90183e+07	70546840	72139030	70546840
P63220	40S ribosomal protein S21	7604060	9.31593e+06	1.4083e+07	7.61513e+06	1.4083e+07
P06733	Alpha-enolase	4.40273e+07	55308450	69392830	5.27014e+07	69392830
Q13428	Treacle protein	7.54706e+06	8.1064e+06	1.25912e+07	5412000	1.25912e+07
Q9NXV2	BTB/POZ domain-containing protein KCTD5	7.62444e+08	1.1317e+09	9.43768e+08	1.29417e+09	9.43768e+08
P45880	Voltage-dependent anion-selective channel protein 2	0	1.33292e+06	0	0	0
P53007	Tricarboxylate transport protein, mitochondrial	0	23048540	0	1860457330	0
P61626	Lysozyme C	0	1.08541e+06	0	0	0
P63173	60S ribosomal protein L38	1.75428e+07	1.92077e+07	3.1626e+07	1.68469e+07	3.1626e+07
P22061	Protein-L-isoaspartate(D-aspartate) O-methyltransferase	2.06562e+07	26637710	3.81764e+07	2.41209e+07	3.81764e+07
Q96DG6	Carboxymethylenebutenolidase homolog	1.8265e+07	2.00875e+07	2.37257e+07	2.50022e+07	2.37257e+07
P16403	Histone H1.2	3483880	4.16277e+06	2.43687e+06	1588100	2.43687e+06
Q9BSD7	Cancer-related nucleoside-triphosphatase	1300600	1.27167e+06	2.10901e+06	1.79886e+06	2.10901e+06
O15355	Protein phosphatase 1G	2.95414e+06	3792091	2.7877e+06	2.20992e+06	2.7877e+06
O95881	Thioredoxin domain-containing protein 12	7758430	1.79931e+07	1.52603e+07	1.08491e+07	1.52603e+07
Q9Y266	Nuclear migration protein nudC	4.68551e+06	4.34492e+06	8.32608e+06	4.29189e+06	8.32608e+06
P41227	N-alpha-acetyltransferase 10	859700	922957	3.06076e+06	720583	3.06076e+06
P41252	Isoleucine--tRNA ligase, cytoplasmic	2.09733e+06	2.26883e+06	3.49658e+06	3077680	3.49658e+06
Q04724;Q04727;Q04725;Q04726	Transducin-like enhancer protein 1;Transducin-like enhancer protein 4;Transducin-like enhancer protein 2;Transducin-like enhancer protein 3	2.91698e+06	2.84824e+06	6.26013e+06	3774220	6.26013e+06
P08238;Q58FF7;P07900	Heat shock protein HSP 90-beta;Putative heat shock protein HSP 90-beta-3;Heat shock protein HSP 90-alpha	1.04093e+08	9.244e+07	1.22311e+08	83821850	1.22311e+08
Q01105	Protein SET	0	0	4.8966e+06	0	4.8966e+06
Q13185	Chromobox protein homolog 3	4222190	3531610	5313190	4.04918e+06	5313190
Q15459	Splicing factor 3A subunit 1	1.60417e+07	16077930	1.91461e+07	1.62014e+07	1.91461e+07
Q8IWX8	Calcium homeostasis endoplasmic reticulum protein	5.30251e+06	4426050	5802520	3.75466e+06	5802520
O75717	WD repeat and HMG-box DNA-binding protein 1	9.98229e+06	7436500	12068790	7132410	12068790
O60506	Heterogeneous nuclear ribonucleoprotein Q	2442410	1.88067e+06	4.47517e+06	3.69513e+06	4.47517e+06
P06493	Cyclin-dependent kinase 1	1316020	1.10891e+06	2357390	1557470	2357390
O60573	Eukaryotic translation initiation factor 4E type 2	409500	0	701060	245117	701060
P06396;CON__Q3SX14	Gelsolin	586367	0	2.61887e+07	2.60834e+07	2.61887e+07
Q9H0U9	Testis-specific Y-encoded-like protein 1	387633	0	1749800	0	1749800
Q9UNZ2	NSFL1 cofactor p47	4223500	1.85887e+06	6.57883e+06	0	6.57883e+06
O75122;Q7Z460	CLIP-associating protein 2;CLIP-associating protein 1	499960	420537	1.6725e+06	0	1.6725e+06
Q3SY69	Mitochondrial 10-formyltetrahydrofolate dehydrogenase	2.92003e+06	3864500	8.41295e+06	3.02772e+06	8.41295e+06
P28340	DNA polymerase delta catalytic subunit	1.65681e+06	305217	1.65899e+06	756180	1.65899e+06
Q9UN86	Ras GTPase-activating protein-binding protein 2	2.11229e+06	1.40081e+06	3.10769e+06	1.46456e+06	3.10769e+06
P06730	Eukaryotic translation initiation factor 4E	1.11511e+06	0	751667	0	751667
P19387	DNA-directed RNA polymerase II subunit RPB3	1.28203e+06	0	704557	0	704557
P62263	40S ribosomal protein S14	9.77504e+06	6.69315e+06	1.48601e+07	5.64912e+06	1.48601e+07
Q13464;O75116	Rho-associated protein kinase 1;Rho-associated protein kinase 2	2.29726e+07	2.21952e+07	25643040	18256800	25643040
Q8TD19	Serine/threonine-protein kinase Nek9	3.17731e+06	2207590	4.08744e+06	2.86858e+06	4.08744e+06
Q96C36	Pyrroline-5-carboxylate reductase 2	3.53019e+06	1.14143e+06	3.12659e+06	1902210	3.12659e+06
Q8TEQ6	Gem-associated protein 5	5534620	3859570	6151940	3.99187e+06	6151940
Q9H3G5	Probable serine carboxypeptidase CPVL	1479280	301617	1.68283e+06	442690	1.68283e+06
P23396	40S ribosomal protein S3	4.82863e+07	2.38577e+07	40765250	34837550	40765250
Q9Y285	Phenylalanine--tRNA ligase alpha subunit	11472380	8000700	1.08241e+07	9078000	1.08241e+07
P78347	General transcription factor II-I	1.81699e+07	1.29314e+07	18244980	1.43049e+07	18244980
Q16875	6-phosphofructo-2-kinase/fructose-2,6-bisphosphatase 3;6-phosphofructo-2-kinase;Fructose-2,6-bisphosphatase	2.82568e+08	2.13458e+08	2.32552e+08	1.87981e+08	2.32552e+08
P25205	DNA replication licensing factor MCM3	4.64094e+07	4.16244e+07	4.21622e+07	4.37246e+07	4.21622e+07
P11940;Q13310	Polyadenylate-binding protein 1;Polyadenylate-binding protein 4	2.34337e+06	4530470	5.57953e+06	2836770	5.57953e+06
P14625;Q58FF3	Endoplasmin;Putative endoplasmin-like protein	2.34126e+06	2.62876e+06	5010510	3.07687e+06	5010510
Q9GZT3	SRA stem-loop-interacting RNA-binding protein, mitochondrial	4.55423e+06	3.87426e+06	3.63842e+06	5503010	3.63842e+06
Q14681	BTB/POZ domain-containing protein KCTD2	1.19924e+08	178886460	179815040	2.07607e+08	179815040
O14974	Protein phosphatase 1 regulatory subunit 12A	2.36966e+06	1.54906e+06	3.50948e+06	1.29951e+06	3.50948e+06
P42766	60S ribosomal protein L35	6.46873e+06	3717770	7.65487e+06	4.8005e+06	7.65487e+06
P84103	Serine/arginine-rich splicing factor 3	9176330	6.53847e+06	9636200	8.74427e+06	9636200
O43172	U4/U6 small nuclear ribonucleoprotein Prp4	7.91086e+06	3.81949e+06	7.44022e+06	3.71451e+06	7.44022e+06
Q7Z353	Highly divergent homeobox	32035730	2.65022e+07	27274940	2.90963e+07	27274940
P31943;P55795	Heterogeneous nuclear ribonucleoprotein H;Heterogeneous nuclear ribonucleoprotein H, N-terminally processed;Heterogeneous nuclear ribonucleoprotein H2	6.66709e+07	7.43587e+07	76704330	5.69066e+07	76704330
Q9Y383	Putative RNA-binding protein Luc7-like 2	8.26916e+06	4.90088e+06	8236860	4726550	8236860
Q6UB35	Monofunctional C1-tetrahydrofolate synthase, mitochondrial	7.72454e+06	5289350	1.03434e+07	3.45447e+06	1.03434e+07
P62333	26S protease regulatory subunit 10B	3.89262e+07	3.84972e+07	6.51745e+07	30168820	6.51745e+07
P22102	Trifunctional purine biosynthetic protein adenosine-3;Phosphoribosylamine--glycine ligase;Phosphoribosylformylglycinamidine cyclo-ligase;Phosphoribosylglycinamide formyltransferase	1.84186e+07	2.53698e+07	35741460	21181230	35741460
Q09028	Histone-binding protein RBBP4	5.48149e+07	61108300	6.34742e+07	4.84568e+07	6.34742e+07
P23284	Peptidyl-prolyl cis-trans isomerase B	14083440	2.03634e+07	25790480	1.24962e+07	25790480
Q9Y6A5	Transforming acidic coiled-coil-containing protein 3	7421700	6.40449e+06	1.07093e+07	5243240	1.07093e+07
O75821	Eukaryotic translation initiation factor 3 subunit G	7.36124e+07	7.37167e+07	7.75315e+07	5.93706e+07	7.75315e+07
Q96N67	Dedicator of cytokinesis protein 7	11549440	9.43795e+06	1.28789e+07	5.64573e+06	1.28789e+07
P62805	Histone H4	1.3886e+06	5.70723e+06	2.02943e+06	0	2.02943e+06
Q14011	Cold-inducible RNA-binding protein	1.9466e+07	1.55218e+07	1.83419e+07	2.03354e+07	1.83419e+07
O43143	Pre-mRNA-splicing factor ATP-dependent RNA helicase DHX15	4.23868e+06	3.87928e+06	7.98011e+06	4.30869e+06	7.98011e+06
P04259;CON__P02538;P02538;CON__P48668;P48668;CON__P13647;P13647;CON__P04259	Keratin, type II cytoskeletal 6B;Keratin, type II cytoskeletal 6A;Keratin, type II cytoskeletal 6C;Keratin, type II cytoskeletal 5	1290070	1.42217e+07	0	3.25697e+06	0
Q04637;O43432	Eukaryotic translation initiation factor 4 gamma 1;Eukaryotic translation initiation factor 4 gamma 3	7.04338e+06	5.15757e+06	11059510	5.96063e+06	11059510
Q07866;Q9H0B6	Kinesin light chain 1;Kinesin light chain 2	3448480	2706900	5.34313e+06	1927300	5.34313e+06
P02545	Prelamin-A/C;Lamin-A/C	2.4211e+06	8069530	1.60325e+06	540877	1.60325e+06
P61604	10 kDa heat shock protein, mitochondrial	6.95484e+06	1.09451e+07	1.1264e+07	9.7062e+06	1.1264e+07
P22314	Ubiquitin-like modifier-activating enzyme 1	6.58743e+06	7.17573e+06	9.20149e+06	8.3032e+06	9.20149e+06
P08238	Heat shock protein HSP 90-beta	241036820	2.28494e+08	2.90463e+08	2.13408e+08	2.90463e+08
P25787	Proteasome subunit alpha type-2	1.07075e+07	14917920	28215350	1.66902e+07	28215350
Q12874	Splicing factor 3A subunit 3	1.87594e+07	16230170	20713010	15451800	20713010
CON__P02533;P02533;CON__Q6IFX2;CON__Q04695;Q04695	Keratin, type I cytoskeletal 14;Keratin, type I cytoskeletal 17	141767	1.76787e+08	0	2321840	0
CON__Q7Z794;Q7Z794	Keratin, type II cytoskeletal 1b	228900	4.18135e+06	0	288073	0
P82933	28S ribosomal protein S9, mitochondrial	5.28554e+06	2.06287e+06	3.34615e+06	2138280	3.34615e+06
Q13435	Splicing factor 3B subunit 2	67612810	6.22567e+07	6.56661e+07	5.49786e+07	6.56661e+07
P14625	Endoplasmin	1.31765e+08	1.14657e+08	1.36506e+08	108302770	1.36506e+08
P04264;CON__P04264	Keratin, type II cytoskeletal 1	4.08021e+08	4.39392e+08	5.36461e+07	6.62749e+08	5.36461e+07
O15372	Eukaryotic translation initiation factor 3 subunit H	5.93618e+07	5.64626e+07	9.37948e+07	4.99365e+07	9.37948e+07
O75122	CLIP-associating protein 2	42478130	2.99066e+07	4.12061e+07	27867470	4.12061e+07
P53621	Coatomer subunit alpha;Xenin;Proxenin	71308110	5.55024e+07	7.62508e+07	4.87832e+07	7.62508e+07
Q13464	Rho-associated protein kinase 1	2.27232e+08	215311220	257701700	1.82664e+08	257701700
P26640	Valine--tRNA ligase	58434660	7.35114e+07	81483400	57644030	81483400
Q14566	DNA replication licensing factor MCM6	1.32981e+07	8.66826e+06	1.63852e+07	12111360	1.63852e+07
P33991	DNA replication licensing factor MCM4	30961870	3.10797e+07	3.816e+07	32762870	3.816e+07
Q86YM7	Homer protein homolog 1	1.37679e+06	305293	2.14344e+08	585603	2.14344e+08
Q9BRS2	Serine/threonine-protein kinase RIO1	5.62938e+08	474359970	5.11115e+08	4.95139e+08	5.11115e+08
P78371	T-complex protein 1 subunit beta	3.35277e+08	382974270	5.69067e+08	287462010	5.69067e+08
Q96AV8	Transcription factor E2F7	3.54581e+07	2.41259e+07	3.217e+07	2.86627e+07	3.217e+07
Q13561	Dynactin subunit 2	37907210	4.10121e+07	54292780	2.94035e+07	54292780
Q9P1Y5	Calmodulin-regulated spectrin-associated protein 3	6.49613e+07	51921980	62303940	47311710	62303940
CON__P13647;P13647	Keratin, type II cytoskeletal 5	5.84836e+06	1.43806e+08	0	11915270	0
Q93009	Ubiquitin carboxyl-terminal hydrolase 7	11609210	8974700	7.67347e+06	6.32129e+06	7.67347e+06
P55072	Transitional endoplasmic reticulum ATPase	5.38758e+08	5.48316e+08	5.98919e+08	4.57091e+08	5.98919e+08
P63244	Guanine nucleotide-binding protein subunit beta-2-like 1;Guanine nucleotide-binding protein subunit beta-2-like 1, N-terminally processed	2.61046e+06	2.98225e+06	6562110	3.24007e+06	6562110
O75150	E3 ubiquitin-protein ligase BRE1B	9.89887e+06	8.03232e+06	1.32734e+07	8.12411e+06	1.32734e+07
P49321	Nuclear autoantigenic sperm protein	2.86576e+07	29357840	5.19096e+07	27678210	5.19096e+07
P62195	26S protease regulatory subunit 8	52439790	52304480	74626860	4.95152e+07	74626860
P52732	Kinesin-like protein KIF11	2.26809e+09	2251396690	2.46503e+09	2.06429e+09	2.46503e+09
Q8N5Z5	BTB/POZ domain-containing protein KCTD17	2.27189e+08	341362490	2.84523e+08	4.26106e+08	2.84523e+08
Q8NBS9	Thioredoxin domain-containing protein 5	2298500	7127930	4717700	4371100	4717700
Q16186	Proteasomal ubiquitin receptor ADRM1	7.92598e+06	4.99273e+06	12422070	4.36469e+06	12422070
Q9UQ35	Serine/arginine repetitive matrix protein 2	1.79346e+07	16669780	2.19398e+07	1.29511e+07	2.19398e+07
P09211	Glutathione S-transferase P	4.71193e+07	64783710	1.09657e+08	7.80542e+07	1.09657e+08
P07195	L-lactate dehydrogenase B chain	9.12659e+06	1.44319e+07	21693760	1.82868e+07	21693760
P33992	DNA replication licensing factor MCM5	28914880	22950230	30601700	2.95183e+07	30601700
P62913	60S ribosomal protein L11	3.20188e+07	22801870	25237600	2.29319e+07	25237600
O60232	Sjoegren syndrome/scleroderma autoantigen 1	15786430	1.48688e+07	22851820	1.33155e+07	22851820
P84090	Enhancer of rudimentary homolog	120812500	1.44695e+08	183732500	1.28965e+08	183732500
O75688;P35813	Protein phosphatase 1B;Protein phosphatase 1A	9.01022e+08	7.36664e+08	1.05542e+09	9.47046e+08	1.05542e+09
P67936;P09493;P06753;CON__Q3SX28;P07951	Tropomyosin alpha-4 chain;Tropomyosin alpha-1 chain;Tropomyosin alpha-3 chain;Tropomyosin beta chain	23087570	2.82829e+07	25906190	2.37921e+07	25906190
Q9Y4E8	Ubiquitin carboxyl-terminal hydrolase 15	85678250	82500820	1.02279e+08	67196080	1.02279e+08
Q15208;Q9Y2H1	Serine/threonine-protein kinase 38;Serine/threonine-protein kinase 38-like	1.99624e+08	161203400	227345800	205136650	227345800
P82650	28S ribosomal protein S22, mitochondrial	9.57293e+06	7.54872e+06	9.96544e+06	6505190	9.96544e+06
P00558	Phosphoglycerate kinase 1	921783	1.73835e+06	2512900	1.06352e+06	2512900
P67775;P62714	Serine/threonine-protein phosphatase 2A catalytic subunit alpha isoform;Serine/threonine-protein phosphatase 2A catalytic subunit beta isoform	4.17373e+06	7.98761e+06	7.87177e+06	6.41537e+06	7.87177e+06
P17980	26S protease regulatory subunit 6A	35248910	42362670	5.15834e+07	3.19503e+07	5.15834e+07
A6NHR9	Structural maintenance of chromosomes flexible hinge domain-containing protein 1	8271720	7.4808e+06	5.91262e+06	3.84956e+06	5.91262e+06
Q9NP73	Putative bifunctional UDP-N-acetylglucosamine transferase and deubiquitinase ALG13	10102900	8.39413e+06	9.24711e+06	6512580	9.24711e+06
CON__P08779;P08779	Keratin, type I cytoskeletal 16	0	7.15879e+07	0	212480	0
P05109	Protein S100-A8;Protein S100-A8, N-terminally processed	1.03323e+06	4.36253e+08	0	0	0
Q9NZT1	Calmodulin-like protein 5	267540	8.71088e+07	283633	1308500	283633
CON__Q5XKE5;Q5XKE5	Keratin, type II cytoskeletal 79	0	18777300	0	0	0
P31151	Protein S100-A7	291970	1.00445e+08	0	121757	0
O75223	Gamma-glutamylcyclotransferase	1.01593e+06	26360180	0	287520	0
P31151;Q86SG5	Protein S100-A7;Protein S100-A7A	0	7.62815e+07	0	0	0
CON__P02533;P02533	Keratin, type I cytoskeletal 14	720560	18113000	0	2.60781e+06	0
P27482	Calmodulin-like protein 3	0	9847800	233860	0	233860
P14923	Junction plakoglobin	0	3967400	0	0	0
P31944	Caspase-14;Caspase-14 subunit p17, mature form;Caspase-14 subunit p10, mature form;Caspase-14 subunit p20, intermediate form;Caspase-14 subunit p8, intermediate form	0	12840600	0	0	0
P53634	Dipeptidyl peptidase 1;Dipeptidyl peptidase 1 exclusion domain chain;Dipeptidyl peptidase 1 heavy chain;Dipeptidyl peptidase 1 light chain	0	6.29657e+06	0	0	0
CON__P02538;P02538	Keratin, type II cytoskeletal 6A	363500	51426700	0	0	0
P54577	Tyrosine--tRNA ligase, cytoplasmic;Tyrosine--tRNA ligase, cytoplasmic, N-terminally processed	1.20389e+06	4.51116e+06	3.60816e+06	3.32386e+06	3.60816e+06
Q06124	Tyrosine-protein phosphatase non-receptor type 11	1.22893e+06	2.22437e+06	2.66347e+06	1.71283e+06	2.66347e+06
O14773	Tripeptidyl-peptidase 1	0	3.87404e+06	1.80302e+06	721913	1.80302e+06
Q02413	Desmoglein-1	0	4.84037e+06	497000	1.28593e+06	497000
P22626	Heterogeneous nuclear ribonucleoproteins A2/B1	1.2328e+07	1.40875e+07	14581250	1.32886e+07	14581250
CON__P02533;P02533;CON__Q04695;Q04695	Keratin, type I cytoskeletal 14;Keratin, type I cytoskeletal 17	0	4.68383e+06	0	0	0
CON__Q9C075;Q9C075	Keratin, type I cytoskeletal 23	0	2611600	0	0	0
P01857;P01860;P01861	Ig gamma-1 chain C region;Ig gamma-3 chain C region;Ig gamma-4 chain C region	0	4.71593e+06	53573.3	63076.7	53573.3
P05141;P12236;P12235	ADP/ATP translocase 2;ADP/ATP translocase 2, N-terminally processed;ADP/ATP translocase 3;ADP/ATP translocase 3, N-terminally processed;ADP/ATP translocase 1	6.90743e+06	10129500	1.34661e+07	7654550	1.34661e+07
P22735	Protein-glutamine gamma-glutamyltransferase K	0	3351700	0	0	0
P23528;Q9Y281	Cofilin-1;Cofilin-2	18246200	2.66084e+07	3.33082e+07	2.00186e+07	3.33082e+07
P29508	Serpin B3	0	5.47107e+06	0	0	0
P32320	Cytidine deaminase	0	3879800	0	0	0
Q8WVV4	Protein POF1B	0	1.04814e+06	0	0	0
Q9NVA2;Q14141	Septin-11;Septin-6	0	2.28533e+06	2.1521e+06	738467	2.1521e+06
Q9UQE7	Structural maintenance of chromosomes protein 3	3.83282e+07	3.40916e+07	4.49857e+07	3.35748e+07	4.49857e+07
P51665	26S proteasome non-ATPase regulatory subunit 7	13318080	1.30204e+07	1.69175e+07	7.96812e+06	1.69175e+07
P04259	Keratin, type II cytoskeletal 6B	1.35457e+06	1.60227e+07	0	0	0
P04259;CON__P48668;P48668;CON__P13647;P13647;CON__P04259	Keratin, type II cytoskeletal 6B;Keratin, type II cytoskeletal 6C;Keratin, type II cytoskeletal 5	337267	1.28711e+07	0	0	0
P18669;P15259;Q8N0Y7	Phosphoglycerate mutase 1;Phosphoglycerate mutase 2;Probable phosphoglycerate mutase 4	368133	2.02602e+06	847533	1.10154e+06	847533
P22392;P15531	Nucleoside diphosphate kinase B;Nucleoside diphosphate kinase A	1.94569e+06	2.08141e+06	4514000	1.60203e+06	4514000
P54136	Arginine--tRNA ligase, cytoplasmic	881553	2.33549e+06	1850730	1223220	1850730
Q14574	Desmocollin-3	920800	1127240	718620	350633	718620
Q16878	Cysteine dioxygenase type 1	1.51715e+07	1.74386e+07	20646200	1.50317e+07	20646200
Q9H9J4	Ubiquitin carboxyl-terminal hydrolase 42	564833	2189620	1298400	60953.3	1298400
Q9UNH7;Q86XE0	Sorting nexin-6;Sorting nexin-6, N-terminally processed;Sorting nexin-32	801500	2.81158e+06	0	3.82795e+07	0
P15170;Q8IYD1	Eukaryotic peptide chain release factor GTP-binding subunit ERF3A;Eukaryotic peptide chain release factor GTP-binding subunit ERF3B	0	1.56363e+06	2.87027e+06	0	2.87027e+06
P56385	ATP synthase subunit e, mitochondrial	452190	1.25297e+06	2.2242e+06	1.04703e+06	2.2242e+06
P63241;Q9GZV4;Q6IS14	Eukaryotic translation initiation factor 5A-1;Eukaryotic translation initiation factor 5A-2;Eukaryotic translation initiation factor 5A-1-like	1.20337e+06	2.39952e+06	3.28391e+06	1877470	3.28391e+06
Q9Y3R4	Sialidase-2	594667	2.69503e+06	1.87813e+06	2.03799e+06	1.87813e+06
O75150;Q5VTR2	E3 ubiquitin-protein ligase BRE1B;E3 ubiquitin-protein ligase BRE1A	2.95273e+06	2.48668e+06	3157050	3.21077e+06	3157050
P17066;P48741	Heat shock 70 kDa protein 6;Putative heat shock 70 kDa protein 7	1.97785e+07	1.69534e+07	2.38445e+07	15452500	2.38445e+07
P24666	Low molecular weight phosphotyrosine protein phosphatase	2189160	2.92222e+06	1.85528e+06	2.44045e+06	1.85528e+06
P55735	Protein SEC13 homolog	7811500	7.62787e+06	9.13533e+06	5.94337e+06	9.13533e+06
P56270;Q14119	Myc-associated zinc finger protein;Vascular endothelial zinc finger 1	2.45282e+06	2.32161e+06	2.54573e+06	1837200	2.54573e+06
Q12905	Interleukin enhancer-binding factor 2	2.64471e+06	4.65297e+06	2.19224e+06	1849280	2.19224e+06
Q15417	Calponin-3	2.7409e+06	1.99413e+06	2.22547e+06	2223400	2.22547e+06
Q92522	Histone H1x	3.18085e+06	3.54036e+06	4448340	2.53661e+06	4448340
Q9BQE3;Q71U36;Q13748;Q6PEY2	Tubulin alpha-1C chain;Tubulin alpha-1A chain;Tubulin alpha-3C/D chain;Tubulin alpha-3E chain	6766400	11021700	1.63972e+07	1.45638e+07	1.63972e+07
O14646	Chromodomain-helicase-DNA-binding protein 1	689580	1.33867e+06	1276150	978600	1276150
P04350;P68371;A6NNZ2;P07437;Q13885;Q9BVA1;Q3ZCM7	Tubulin beta-4A chain;Tubulin beta-4B chain;Tubulin beta-8 chain-like protein LOC260334;Tubulin beta chain;Tubulin beta-2A chain;Tubulin beta-2B chain;Tubulin beta-8 chain	636620	1.36252e+06	2.49443e+06	1.35361e+06	2.49443e+06
P05198	Eukaryotic translation initiation factor 2 subunit 1	1.83317e+06	2697000	1815800	1.39767e+06	1815800
P31930	Cytochrome b-c1 complex subunit 1, mitochondrial	1.51537e+06	1.7229e+06	1.08383e+06	898980	1.08383e+06
P35908;CON__P35908;P04259;CON__P02538;P02538;CON__O95678;O95678;CON__P07744;CON__Q8VED5;CON__P48668;P48668;CON__P13647;P13647;CON__Q5XKE5;Q5XKE5;CON__P04259;CON__P05787;P05787	Keratin, type II cytoskeletal 2 epidermal;Keratin, type II cytoskeletal 6B;Keratin, type II cytoskeletal 6A;Keratin, type II cytoskeletal 75;Keratin, type II cytoskeletal 6C;Keratin, type II cytoskeletal 5;Keratin, type II cytoskeletal 79;Keratin, type II cytoskeletal 8	1.41347e+06	7.11348e+06	236937	2419000	236937
P41567	Eukaryotic translation initiation factor 1	1355990	2.06083e+06	1.46933e+06	436767	1.46933e+06
P42566	Epidermal growth factor receptor substrate 15	1.10428e+06	1259860	1.12023e+06	464833	1.12023e+06
Q14103;O14979	Heterogeneous nuclear ribonucleoprotein D0;Heterogeneous nuclear ribonucleoprotein D-like	1.7783e+06	1.47861e+06	847270	1.51064e+06	847270
Q56P03	E2F-associated phosphoprotein	1.12735e+06	1.24211e+06	683633	1.1953e+06	683633
Q9BVK6	Transmembrane emp24 domain-containing protein 9	561090	985780	734133	811523	734133
Q9Y657;Q9BPZ2;Q99865;Q5JUX0	Spindlin-1;Spindlin-2B;Spindlin-2A;Spindlin-3	1718700	2.12657e+06	2509200	1.57495e+06	2509200
P01617;P01614;P06309;P06310	Ig kappa chain V-II region TEW;Ig kappa chain V-II region Cum;Ig kappa chain V-II region GM607;Ig kappa chain V-II region RPMI 6410	1465900	632640	4.30262e+07	1.10803e+06	4.30262e+07
P10644	cAMP-dependent protein kinase type I-alpha regulatory subunit;cAMP-dependent protein kinase type I-alpha regulatory subunit, N-terminally processed	337400	720987	1693020	395400	1693020
Q15170	Transcription elongation factor A protein-like 1	74690	570283	570103	2.26328e+06	570103
Q6UB35;P11586	Monofunctional C1-tetrahydrofolate synthase, mitochondrial;C-1-tetrahydrofolate synthase, cytoplasmic;Methylenetetrahydrofolate dehydrogenase;Methenyltetrahydrofolate cyclohydrolase;Formyltetrahydrofolate synthetase;C-1-tetrahydrofolate synthase, cytoplasmic, N-terminally processed	1.40257e+06	1129240	4405100	1.18563e+06	4405100
Q92945;Q96AE4;Q96I24	Far upstream element-binding protein 2;Far upstream element-binding protein 1;Far upstream element-binding protein 3	605933	1.72903e+06	3832600	2675500	3832600
Q9UL15	BAG family molecular chaperone regulator 5	527400	774400	1.51825e+07	315663	1.51825e+07
Q9P270;Q8ND83	SLAIN motif-containing protein 2;SLAIN motif-containing protein 1	942603	2.19322e+06	3481440	2.11642e+06	3481440
O14617	AP-3 complex subunit delta-1	6425480	5651850	6.79074e+06	3.85885e+06	6.79074e+06
P35580;P35579	Myosin-10;Myosin-9	5.73369e+06	6277920	5.73086e+06	4.99995e+06	5.73086e+06
P52907	F-actin-capping protein subunit alpha-1	1.29209e+07	1.79481e+07	1.83334e+07	1.45066e+07	1.83334e+07
CON__P00761;Q9BYE2;CON__P07477;P07477	Transmembrane protease serine 13;Trypsin-1;Alpha-trypsin chain 1;Alpha-trypsin chain 2	6.89767e+06	6617400	5.75537e+06	7408700	5.75537e+06
O14737	Programmed cell death protein 5	4.96175e+06	5.38223e+06	7.83074e+06	4.54569e+06	7.83074e+06
O14929	Histone acetyltransferase type B catalytic subunit	1.27029e+06	823847	1536500	476800	1536500
P07900;Q58FG0	Heat shock protein HSP 90-alpha;Putative heat shock protein HSP 90-alpha A5	5.32595e+06	5.23155e+06	6.58668e+06	4486510	6.58668e+06
P17812;Q9NRF8	CTP synthase 1;CTP synthase 2	1.3163e+06	785550	1.37401e+06	1.26117e+06	1.37401e+06
P25490	Transcriptional repressor protein YY1	1560680	682560	1.05302e+06	779863	1.05302e+06
P30837	Aldehyde dehydrogenase X, mitochondrial	1700500	1.62841e+06	1141360	1.15154e+06	1141360
P42025	Beta-centractin	3.60893e+06	4.38277e+06	5.26187e+06	4.57784e+06	5.26187e+06
P50502;Q8NFI4	Hsc70-interacting protein;Putative protein FAM10A5	1.96887e+06	3.67183e+06	3.05293e+06	3083400	3.05293e+06
P50750	Cyclin-dependent kinase 9	5.46291e+06	4.32364e+06	3.26053e+06	3908290	3.26053e+06
P58107	Epiplakin	1.03222e+06	1610500	726703	561643	726703
P60510	Serine/threonine-protein phosphatase 4 catalytic subunit	5.81882e+06	7.14947e+06	7420400	3665940	7420400
P61981;P31946	14-3-3 protein gamma;14-3-3 protein gamma, N-terminally processed;14-3-3 protein beta/alpha;14-3-3 protein beta/alpha, N-terminally processed	1.195e+07	1.13903e+07	10926260	1.08975e+07	10926260
P62158;P02585;P27482	Calmodulin;Troponin C, skeletal muscle;Calmodulin-like protein 3	3.69967e+06	7.17537e+06	5525500	2.96253e+06	5525500
P62273	40S ribosomal protein S29	3.64113e+06	3416700	5447900	1.15177e+06	5447900
P62304	Small nuclear ribonucleoprotein E	2.93752e+07	30739200	3.55729e+07	2.58727e+07	3.55729e+07
P62701;Q8TD47	40S ribosomal protein S4, X isoform;40S ribosomal protein S4, Y isoform 2	2.00103e+06	1.67247e+06	2.81387e+06	602267	2.81387e+06
P63208	S-phase kinase-associated protein 1	1570950	1.35303e+06	2323720	864300	2323720
Q13330	Metastasis-associated protein MTA1	3.64302e+06	2.81095e+06	2997480	1855570	2997480
Q13557	Calcium/calmodulin-dependent protein kinase type II subunit delta	2.04059e+06	2.92332e+06	2.61634e+06	162340	2.61634e+06
Q16586	Alpha-sarcoglycan	1.72259e+06	1183500	911600	969783	911600
Q53H96	Pyrroline-5-carboxylate reductase 3	1.68158e+06	1.82471e+06	2.97466e+06	2.49774e+06	2.97466e+06
Q6ZU80	Centrosomal protein of 128 kDa	9.44353e+06	6.48943e+06	2554100	7324500	2554100
Q71UM5	40S ribosomal protein S27-like	2.07287e+06	757120	2720100	543700	2720100
Q7L2H7	Eukaryotic translation initiation factor 3 subunit M	18942600	2.20627e+07	20160710	1.77513e+07	20160710
Q8N8S7;Q9UI08	Protein enabled homolog;Ena/VASP-like protein	1.30027e+06	2757700	3.97807e+06	2.03227e+06	3.97807e+06
Q92665	28S ribosomal protein S31, mitochondrial	4223430	3.52183e+06	3863830	2.77221e+06	3863830
Q92841;P17844	Probable ATP-dependent RNA helicase DDX17;Probable ATP-dependent RNA helicase DDX5	1170340	906900	1.37553e+06	293537	1.37553e+06
Q9H2U2	Inorganic pyrophosphatase 2, mitochondrial	2243400	2.54097e+06	2015400	1.13747e+06	2015400
Q9H814	Phosphorylated adapter RNA export protein	1.9381e+06	2.19897e+06	1.49523e+06	1.19182e+06	1.49523e+06
Q9NYL9;Q9NZR1	Tropomodulin-3;Tropomodulin-2	424577	218943	557600	361540	557600
Q9NZ01	Very-long-chain enoyl-CoA reductase	2.37566e+06	2.02891e+06	4042500	2191110	4042500
Q9Y3B4	Splicing factor 3B subunit 6	1.25073e+06	1.67188e+06	1.27821e+06	711197	1.27821e+06
O14818;Q8TAA3	Proteasome subunit alpha type-7;Proteasome subunit alpha type-7-like	1.38583e+07	15995410	23002050	1.44944e+07	23002050
P83731	60S ribosomal protein L24	20433380	21171970	2.65219e+07	17450640	2.65219e+07
P54252	Ataxin-3	1.57745e+06	2.53835e+06	2.73163e+06	2619600	2.73163e+06
Q15293	Reticulocalbin-1	2.26321e+06	1343160	1380900	950000	1380900
P49589	Cysteine--tRNA ligase, cytoplasmic	1.05473e+06	359033	1.60635e+06	357033	1.60635e+06
O60220	Mitochondrial import inner membrane translocase subunit Tim8 A	2.20839e+06	1.31917e+06	1423320	573983	1423320
P50454	Serpin H1	1.56556e+06	796980	2699670	2412310	2699670
P63241;Q9GZV4	Eukaryotic translation initiation factor 5A-1;Eukaryotic translation initiation factor 5A-2	4.01103e+06	3450800	7.23133e+06	4.93253e+06	7.23133e+06
P80297;P02795;P13640;P80294;P04731	Metallothionein-1X;Metallothionein-2;Metallothionein-1G;Metallothionein-1H;Metallothionein-1A	1.26228e+06	679313	1.77134e+06	608443	1.77134e+06
Q92598;P34932	Heat shock protein 105 kDa;Heat shock 70 kDa protein 4	5.34953e+06	2.63683e+06	6.45383e+06	2.57743e+06	6.45383e+06
Q9Y5U2	Protein TSSC4	2.08567e+06	1.96213e+06	2.97243e+06	1.44693e+06	2.97243e+06
P07437;Q13885;Q9BVA1	Tubulin beta chain;Tubulin beta-2A chain;Tubulin beta-2B chain	78372140	8.04197e+07	104024200	8.58409e+07	104024200
P09012	U1 small nuclear ribonucleoprotein A	3.56357e+06	1.97997e+06	2911260	1863300	2911260
P09132	Signal recognition particle 19 kDa protein	2.01935e+06	2.07361e+06	3.83842e+06	2.24735e+06	3.83842e+06
P0DMV9;P0DMV8;P17066	Heat shock 70 kDa protein 1B;Heat shock 70 kDa protein 1A;Heat shock 70 kDa protein 6	3.09798e+07	5.10784e+07	5.58533e+07	51538500	5.58533e+07
P18621	60S ribosomal protein L17	1.20649e+07	1.37083e+07	1.52405e+07	6.18754e+06	1.52405e+07
Q99436	Proteasome subunit beta type-7	1.09001e+07	1.38918e+07	1.50305e+07	1.2051e+07	1.50305e+07
P19338	Nucleolin	54318030	7.06577e+07	54489740	44166800	54489740
P68371;P07437;Q13885;Q9BVA1	Tubulin beta-4B chain;Tubulin beta chain;Tubulin beta-2A chain;Tubulin beta-2B chain	125706700	1.23245e+08	1.77312e+08	1.16272e+08	1.77312e+08
P04264	Keratin, type II cytoskeletal 1	4.44327e+07	2.05641e+08	3.08773e+06	7.72237e+07	3.08773e+06
P08670;P41219	Vimentin;Peripherin	4919010	3.28983e+06	5.00854e+06	2812290	5.00854e+06
P62899	60S ribosomal protein L31	10295290	9301560	13499480	8347740	13499480
Q15018	BRISC complex subunit Abro1	2.0314e+06	782067	1098240	517833	1098240
O14776	Transcription elongation regulator 1	2.19382e+06	318850	960823	1.22791e+06	960823
O60783	28S ribosomal protein S14, mitochondrial	4.83778e+06	3.481e+06	4818580	2.74616e+06	4818580
P04264;CON__P04264;CON__Q7Z794;Q7Z794;P35908;CON__P35908;CON__Q9R0H5;CON__Q6NXH9	Keratin, type II cytoskeletal 1;Keratin, type II cytoskeletal 1b;Keratin, type II cytoskeletal 2 epidermal	1.82661e+07	6571100	987563	3.62533e+07	987563
Q13136	Liprin-alpha-1	1.58427e+06	244290	710897	283723	710897
Q6PD62	RNA polymerase-associated protein CTR9 homolog	1555600	154360	1.21789e+06	1.80093e+06	1.21789e+06
P67809	Nuclease-sensitive element-binding protein 1	1.2041e+07	8.32863e+06	10978280	7.88714e+06	10978280
Q14839	Chromodomain-helicase-DNA-binding protein 4	2.07141e+07	1.32617e+07	20724750	1.5806e+07	20724750
Q16181	Septin-7	5.17945e+07	4.10929e+07	5.77178e+07	4.18246e+07	5.77178e+07
Q13123	Protein Red	3.12133e+06	622703	986593	1.81317e+06	986593
Q4V328	GRIP1-associated protein 1	2.77629e+06	1.96717e+06	357567	0	357567
Q92922	SWI/SNF complex subunit SMARCC1	1.24176e+06	323510	1274090	422333	1274090
Q9BUQ8	Probable ATP-dependent RNA helicase DDX23	5.33882e+06	4741040	5.57664e+06	3.718e+06	5.57664e+06
Q9BVA1	Tubulin beta-2B chain	6.59498e+06	4.16047e+06	8053000	5324040	8053000
CON__P02538;P02538;CON__O95678;O95678;CON__P48668;P48668;CON__P04259	Keratin, type II cytoskeletal 6A;Keratin, type II cytoskeletal 75;Keratin, type II cytoskeletal 6C	0	88929000	0	0	0
CON__P08779;P08779;CON__Q9Z2K1;CON__Q3ZAW8	Keratin, type I cytoskeletal 16	130393	17899600	0	0	0
CON__P19012;P19012	Keratin, type I cytoskeletal 15	594833	2.25913e+06	586260	165230	586260
P23528;Q9Y281;P60981	Cofilin-1;Cofilin-2;Destrin	0	3.52717e+06	6.79257e+06	3129600	6.79257e+06
Q01469	Fatty acid-binding protein, epidermal	454767	2.98434e+06	0	131517	0
Q7RTV0	PHD finger-like domain-containing protein 5A	8406440	1.01458e+07	5.42253e+06	7.40973e+06	5.42253e+06
P08195	4F2 cell-surface antigen heavy chain	997563	3.00772e+06	2.59618e+06	1.35843e+06	2.59618e+06
Q92841	Probable ATP-dependent RNA helicase DDX17	5.85933e+06	6411860	6435500	4.16796e+06	6435500
Q15393	Splicing factor 3B subunit 3	4.30419e+07	48093450	6.11882e+07	3.97247e+07	6.11882e+07
P08238;Q58FF7;P07900;Q14568;Q58FG1	Heat shock protein HSP 90-beta;Putative heat shock protein HSP 90-beta-3;Heat shock protein HSP 90-alpha;Heat shock protein HSP 90-alpha A2;Putative heat shock protein HSP 90-alpha A4	4.3963e+06	4472500	6750560	4144060	6750560
P68363;P68366;Q9H853;Q9BQE3	Tubulin alpha-1B chain;Tubulin alpha-4A chain;Putative tubulin-like protein alpha-4B;Tubulin alpha-1C chain	1.28267e+06	10698400	1.83294e+07	3257100	1.83294e+07
CON__P02538;P02538;CON__P48668;P48668	Keratin, type II cytoskeletal 6A;Keratin, type II cytoskeletal 6C	0	1.20427e+07	0	480633	0
CON__P02768-1;P02768	Serum albumin	0	1329200	0	0	0
CON__P08779;P08779;CON__P02533;P02533	Keratin, type I cytoskeletal 16;Keratin, type I cytoskeletal 14	0	8.20273e+06	0	0	0
CON__P08779;P08779;CON__Q9Z2K1;CON__Q3ZAW8;CON__P02533;P02533	Keratin, type I cytoskeletal 16;Keratin, type I cytoskeletal 14	0	1.79097e+07	0	0	0
CON__P20930;P20930	Filaggrin	0	5393800	0	0	0
CON__Q5D862;Q5D862	Filaggrin-2	0	3.13447e+06	0	367503	0
P04259;CON__P04259	Keratin, type II cytoskeletal 6B	0	1.02373e+07	0	0	0
P07195;P00338	L-lactate dehydrogenase B chain;L-lactate dehydrogenase A chain	0	1713800	669000	0	669000
P25815	Protein S100-P	0	1.65377e+06	0	0	0
P29508;P48594	Serpin B3;Serpin B4	0	2157100	0	0	0
P61313	60S ribosomal protein L15	0	900237	287827	648567	287827
Q6ZVX7	F-box only protein 50	0	5033400	0	0	0
Q96QA5	Gasdermin-A	0	747130	123760	0	123760
Q99623	Prohibitin-2	328577	975863	459183	728043	459183
Q9BTE3	Mini-chromosome maintenance complex-binding protein	1202700	1.12547e+06	1504030	1426910	1504030
P62158	Calmodulin	1.97565e+07	2.18699e+07	2.66192e+07	1.79397e+07	2.66192e+07
Q9BPZ2;Q99865	Spindlin-2B;Spindlin-2A	4.26976e+06	2916420	7513990	4340330	7513990
Q96F86	Enhancer of mRNA-decapping protein 3	1972350	1052020	2.14883e+06	400847	2.14883e+06
A1A4V9	Coiled-coil domain-containing protein C16orf93	0	1.02767e+06	0	0	0
CON__P02533;P02533;CON__Q61782	Keratin, type I cytoskeletal 14	0	1.69613e+06	0	578133	0
CON__P02533;P02533;CON__Q61782;CON__Q04695;Q04695	Keratin, type I cytoskeletal 14;Keratin, type I cytoskeletal 17	0	1150500	0	0	0
CON__P02533;P02533;CON__Q6IFX2	Keratin, type I cytoskeletal 14	183940	3.16237e+06	0	0	0
CON__P08779;P08779;CON__Q9Z2K1;CON__Q3ZAW8;CON__P35900;CON__Q9D312;P35900;CON__P02533;P02533;CON__Q6IFX2;CON__Q61782;CON__Q04695;Q04695	Keratin, type I cytoskeletal 16;Keratin, type I cytoskeletal 20;Keratin, type I cytoskeletal 14;Keratin, type I cytoskeletal 17	0	2.55887e+07	0	683733	0
CON__Q8N1N4-2;CON__Q7RTT2;Q8N1N4	Keratin, type II cytoskeletal 78	0	808733	0	0	0
O14578	Citron Rho-interacting kinase	165740	847600	237900	380267	237900
O60911	Cathepsin L2	0	1.00163e+06	0	0	0
P01834	Ig kappa chain C region	0	905500	0	0	0
P01857;P01860	Ig gamma-1 chain C region;Ig gamma-3 chain C region	0	258633	0	0	0
P05089	Arginase-1	0	1610600	0	0	0
P06396	Gelsolin	0	786433	0	0	0
P18669;Q8N0Y7	Phosphoglycerate mutase 1;Probable phosphoglycerate mutase 4	324557	1.26743e+06	785333	447033	785333
P25311	Zinc-alpha-2-glycoprotein	0	681700	0	0	0
P29373	Cellular retinoic acid-binding protein 2	0	481967	0	0	0
P34931	Heat shock 70 kDa protein 1-like	0	207530	0	105277	0
P35908;CON__P35908;P04259;CON__P02538;P02538;CON__O95678;O95678;CON__P07744;CON__P48668;P48668;CON__P13647;P13647;CON__Q5XKE5;Q5XKE5;CON__P04259	Keratin, type II cytoskeletal 2 epidermal;Keratin, type II cytoskeletal 6B;Keratin, type II cytoskeletal 6A;Keratin, type II cytoskeletal 75;Keratin, type II cytoskeletal 6C;Keratin, type II cytoskeletal 5;Keratin, type II cytoskeletal 79	366767	3.11317e+06	0	1.24067e+06	0
P37802;Q9UI15	Transgelin-2;Transgelin-3	0	488667	0	366333	0
P46778	60S ribosomal protein L21	0	378167	0	0	0
P50914	60S ribosomal protein L14	237313	770097	200067	0	200067
P51970	NADH dehydrogenase [ubiquinone] 1 alpha subcomplex subunit 8	0	237937	0	456867	0
P53999	Activated RNA polymerase II transcriptional coactivator p15	978800	956567	1.71293e+06	1185080	1.71293e+06
P68363;P68366;A6NHL2;Q9BQE3;Q71U36;Q13748;Q6PEY2	Tubulin alpha-1B chain;Tubulin alpha-4A chain;Tubulin alpha chain-like 3;Tubulin alpha-1C chain;Tubulin alpha-1A chain;Tubulin alpha-3C/D chain;Tubulin alpha-3E chain	0	386433	1.79673e+06	195663	1.79673e+06
P68363;Q9BQE3;Q71U36;Q13748	Tubulin alpha-1B chain;Tubulin alpha-1C chain;Tubulin alpha-1A chain;Tubulin alpha-3C/D chain	0	443400	0	0	0
Q01130	Serine/arginine-rich splicing factor 2	0	499733	0	378733	0
Q07954	Prolow-density lipoprotein receptor-related protein 1;Low-density lipoprotein receptor-related protein 1 85 kDa subunit;Low-density lipoprotein receptor-related protein 1 515 kDa subunit;Low-density lipoprotein receptor-related protein 1 intracellular domain	0	144460	577253	0	577253
Q13835	Plakophilin-1	0	520767	0	0	0
Q15233;P23246	Non-POU domain-containing octamer-binding protein;Splicing factor, proline- and glutamine-rich	1.39503e+06	2.18173e+06	1.83917e+06	1311400	1.83917e+06
Q16875;Q16877	6-phosphofructo-2-kinase/fructose-2,6-bisphosphatase 3;6-phosphofructo-2-kinase;Fructose-2,6-bisphosphatase;6-phosphofructo-2-kinase/fructose-2,6-bisphosphatase 4;6-phosphofructo-2-kinase;Fructose-2,6-bisphosphatase	540767	1189600	592400	908267	592400
Q5VT79;P13928	Annexin A8-like protein 2;Annexin A8	0	422633	0	0	0
Q6NZY4	Zinc finger CCHC domain-containing protein 8	0	531000	0	0	0
Q6P4Q7	Metal transporter CNNM4	0	1.26413e+07	1.98813e+07	684367	1.98813e+07
Q86U42	Polyadenylate-binding protein 2	406100	679153	113923	906733	113923
Q92947	Glutaryl-CoA dehydrogenase, mitochondrial	0	150693	0	0	0
Q99880;Q99879;Q99877;Q93079;Q8N257;Q5QNW6;Q16778;P62807;P58876;P33778;P23527;Q96A08	Histone H2B type 1-L;Histone H2B type 1-M;Histone H2B type 1-N;Histone H2B type 1-H;Histone H2B type 3-B;Histone H2B type 2-F;Histone H2B type 2-E;Histone H2B type 1-C/E/F/G/I;Histone H2B type 1-D;Histone H2B type 1-B;Histone H2B type 1-O;Histone H2B type 1-A	0	1062500	0	0	0
Q9NSE4	Isoleucine--tRNA ligase, mitochondrial	0	355933	0	0	0
Q9NZI8;O00425	Insulin-like growth factor 2 mRNA-binding protein 1;Insulin-like growth factor 2 mRNA-binding protein 3	300637	691343	477033	364333	477033
Q9UN37	Vacuolar protein sorting-associated protein 4A	0	118143	0	165237	0
Q9Y241	HIG1 domain family member 1A, mitochondrial	0	629767	501577	173997	501577
Q9Y6G3	39S ribosomal protein L42, mitochondrial	0	351833	729830	327770	729830
P13797	Plastin-3	576703	1.4725e+06	1571290	924200	1571290
P19388	DNA-directed RNA polymerases I, II, and III subunit RPABC1	1.8121e+06	2.3797e+06	2904420	1674050	2904420
P68371;P07437	Tubulin beta-4B chain;Tubulin beta chain	41412000	64398000	5.89813e+07	27307500	5.89813e+07
Q07666;Q5VWX1	KH domain-containing, RNA-binding, signal transduction-associated protein 1;KH domain-containing, RNA-binding, signal transduction-associated protein 2	3159630	3.43612e+06	3.87606e+06	2.39046e+06	3.87606e+06
Q4VCS5;Q8IY63	Angiomotin;Angiomotin-like protein 1	2.60718e+06	2.68312e+06	3.08637e+06	3142200	3.08637e+06
Q9ULX6	A-kinase anchor protein 8-like	1325850	1.70149e+06	931457	2.8007e+06	931457
CON__P02538;P02538;CON__O95678;O95678;CON__P07744;CON__Q8VED5;CON__Q5XKE5;Q5XKE5;CON__Q8N1N4-2;CON__Q7RTT2;Q8N1N4	Keratin, type II cytoskeletal 6A;Keratin, type II cytoskeletal 75;Keratin, type II cytoskeletal 79;Keratin, type II cytoskeletal 78	1.01893e+06	7.88463e+06	0	0	0
CON__P08779;P08779;CON__P19012;P19012;CON__P02533;P02533;CON__Q6IFX2	Keratin, type I cytoskeletal 16;Keratin, type I cytoskeletal 15;Keratin, type I cytoskeletal 14	480933	1.87013e+06	0	1.34193e+06	0
O00264;O15173	Membrane-associated progesterone receptor component 1;Membrane-associated progesterone receptor component 2	0	0	156437	0	156437
O00268	Transcription initiation factor TFIID subunit 4	999600	745233	249893	906353	249893
O43504	Ragulator complex protein LAMTOR5	695200	187703	587547	595667	587547
O43805	Sjoegren syndrome nuclear autoantigen 1	0	0	179733	0	179733
O60271;Q9UPT6	C-Jun-amino-terminal kinase-interacting protein 4;C-Jun-amino-terminal kinase-interacting protein 3	4.42557e+06	3.32157e+06	4776200	3025540	4776200
O60506;O43390	Heterogeneous nuclear ribonucleoprotein Q;Heterogeneous nuclear ribonucleoprotein R	9.26129e+06	1.03475e+07	1.09735e+07	8094860	1.09735e+07
O75376	Nuclear receptor corepressor 1	338200	244447	322710	0	322710
O95299	NADH dehydrogenase [ubiquinone] 1 alpha subcomplex subunit 10, mitochondrial	0	0	377667	0	377667
P00367	Glutamate dehydrogenase 1, mitochondrial	976600	520293	2.23607e+06	907067	2.23607e+06
P00558;P07205	Phosphoglycerate kinase 1;Phosphoglycerate kinase 2	1.24627e+06	1.37237e+06	1.65977e+06	2.11437e+06	1.65977e+06
P04049	RAF proto-oncogene serine/threonine-protein kinase	0	0	230250	0	230250
P04259;CON__P48668;P48668;CON__P04259	Keratin, type II cytoskeletal 6B;Keratin, type II cytoskeletal 6C	459167	3.64467e+06	0	0	0
P04350;P68371;P07437;Q13885;Q9BVA1;Q9BUF5	Tubulin beta-4A chain;Tubulin beta-4B chain;Tubulin beta chain;Tubulin beta-2A chain;Tubulin beta-2B chain;Tubulin beta-6 chain	1.56251e+07	1.36572e+07	2.13733e+07	1.40871e+07	2.13733e+07
P04350;Q9BUF5	Tubulin beta-4A chain;Tubulin beta-6 chain	0	0	214580	600647	214580
P06744	Glucose-6-phosphate isomerase	1141100	1654400	5785700	2.26351e+06	5785700
P07195;Q6ZMR3;P07864;P00338	L-lactate dehydrogenase B chain;L-lactate dehydrogenase A-like 6A;L-lactate dehydrogenase C chain;L-lactate dehydrogenase A chain	1819600	1.33243e+06	3423500	3.15793e+06	3423500
P08559;P29803	Pyruvate dehydrogenase E1 component subunit alpha, somatic form, mitochondrial;Pyruvate dehydrogenase E1 component subunit alpha, testis-specific form, mitochondrial	643033	312227	0	0	0
P09429	High mobility group protein B1	0	0	967533	128783	967533
P09884	DNA polymerase alpha catalytic subunit	0	0	88796.7	222387	88796.7
P16615;O14983	Sarcoplasmic/endoplasmic reticulum calcium ATPase 2;Sarcoplasmic/endoplasmic reticulum calcium ATPase 1	548767	414267	1.63492e+06	559800	1.63492e+06
P25490;O15391;Q96MM3	Transcriptional repressor protein YY1;Transcription factor YY2;Zinc finger protein 42 homolog	0	0	658333	768033	658333
P30520	Adenylosuccinate synthetase isozyme 2	0	0	395167	430103	395167
P35908;CON__P35908;CON__Q5XKE5;Q5XKE5	Keratin, type II cytoskeletal 2 epidermal;Keratin, type II cytoskeletal 79	663167	1696500	0	1.75393e+06	0
P35908;CON__P35908;P04259;CON__P02538;P02538;CON__P48668;P48668;CON__P04259	Keratin, type II cytoskeletal 2 epidermal;Keratin, type II cytoskeletal 6B;Keratin, type II cytoskeletal 6A;Keratin, type II cytoskeletal 6C	905700	7.00633e+07	0	6.43763e+06	0
P37802	Transgelin-2	1.09115e+06	946643	1155140	1.3306e+06	1155140
P46821;P78559	Microtubule-associated protein 1B;MAP1B heavy chain;MAP1 light chain LC1;Microtubule-associated protein 1A;MAP1A heavy chain;MAP1 light chain LC2	632267	380833	745590	291490	745590
P47914	60S ribosomal protein L29	1.12976e+06	1267510	1.23377e+06	432930	1.23377e+06
P49459	Ubiquitin-conjugating enzyme E2 A	303213	500380	231033	393833	231033
P49773	Histidine triad nucleotide-binding protein 1	0	0	637733	0	637733
P55010	Eukaryotic translation initiation factor 5	0	0	769927	0	769927
P55084	Trifunctional enzyme subunit beta, mitochondrial;3-ketoacyl-CoA thiolase	692260	1392400	559667	2.44485e+06	559667
P62424	60S ribosomal protein L7a	0	0	305143	0	305143
P62495	Eukaryotic peptide chain release factor subunit 1	630167	436000	696687	740657	696687
P62873;P62879	Guanine nucleotide-binding protein G(I)/G(S)/G(T) subunit beta-1;Guanine nucleotide-binding protein G(I)/G(S)/G(T) subunit beta-2	0	0	254783	0	254783
P63151;Q66LE6	Serine/threonine-protein phosphatase 2A 55 kDa regulatory subunit B alpha isoform;Serine/threonine-protein phosphatase 2A 55 kDa regulatory subunit B delta isoform	0	0	386600	715000	386600
Q01650	Large neutral amino acids transporter small subunit 1	0	0	1005700	0	1005700
Q02878	60S ribosomal protein L6	1.23437e+06	1.05203e+06	633200	1430200	633200
Q06830;P32119	Peroxiredoxin-1;Peroxiredoxin-2	33969000	51739000	7.37332e+07	4.02766e+07	7.37332e+07
Q13243	Serine/arginine-rich splicing factor 5	241857	323927	0	480440	0
Q13541	Eukaryotic translation initiation factor 4E-binding protein 1	199237	248193	382273	256123	382273
Q15287	RNA-binding protein with serine-rich domain 1	4.30567e+06	2.55533e+06	4.90227e+06	1.45023e+06	4.90227e+06
Q15645	Pachytene checkpoint protein 2 homolog	0	0	180670	0	180670
Q3ZCQ8	Mitochondrial import inner membrane translocase subunit TIM50	1.48336e+06	1125700	542700	980367	542700
Q5SW79;Q96L14	Centrosomal protein of 170 kDa;Cep170-like protein	0	0	112300	0	112300
Q7L576;Q96F07	Cytoplasmic FMR1-interacting protein 1;Cytoplasmic FMR1-interacting protein 2	1.30791e+06	1.40113e+06	1.62631e+06	675203	1.62631e+06
Q7L5N1	COP9 signalosome complex subunit 6	940033	1054300	1.31657e+06	851800	1.31657e+06
Q86VP6;O75155	Cullin-associated NEDD8-dissociated protein 1;Cullin-associated NEDD8-dissociated protein 2	315557	402500	1295900	0	1295900
Q8IZS5	Orofacial cleft 1 candidate gene 1 protein	0	0	105210	0	105210
Q92945;Q96AE4	Far upstream element-binding protein 2;Far upstream element-binding protein 1	479400	311310	0	144040	0
Q96G46	tRNA-dihydrouridine(47) synthase [NAD(P)(+)]-like	0	0	329747	0	329747
Q99880;Q99879;Q99877;Q93079;Q8N257;Q5QNW6;Q16778;P62807;P58876;P33778;P23527;P57053;P06899;O60814;Q96A08	Histone H2B type 1-L;Histone H2B type 1-M;Histone H2B type 1-N;Histone H2B type 1-H;Histone H2B type 3-B;Histone H2B type 2-F;Histone H2B type 2-E;Histone H2B type 1-C/E/F/G/I;Histone H2B type 1-D;Histone H2B type 1-B;Histone H2B type 1-O;Histone H2B type F-S;Histone H2B type 1-J;Histone H2B type 1-K;Histone H2B type 1-A	1.16163e+06	2.72464e+06	467633	267143	467633
Q9BW92	Threonine--tRNA ligase, mitochondrial	0	0	226533	0	226533
Q9BXJ9	N-alpha-acetyltransferase 15, NatA auxiliary subunit	1.04083e+06	962000	1.01887e+06	265163	1.01887e+06
Q9H000	Probable E3 ubiquitin-protein ligase makorin-2	0	0	123517	628667	123517
Q9H0B6	Kinesin light chain 2	3987600	3.85393e+06	5.97888e+06	4.05093e+06	5.97888e+06
Q9NUG6	p53 and DNA damage-regulated protein 1	0	0	682333	0	682333
Q9NVA2;Q14141;Q92599	Septin-11;Septin-6;Septin-8	2.2201e+06	5.94593e+06	5.31677e+06	2937600	5.31677e+06
Q9NVI7	ATPase family AAA domain-containing protein 3A	167257	88373.3	228210	0	228210
Q9UBB4	Ataxin-10	0	0	984167	605677	984167
Q9UBS4	DnaJ homolog subfamily B member 11	0	0	361333	475113	361333
Q9UEG4	Zinc finger protein 629	595480	1.30843e+06	610833	676953	610833
Q9UHD1	Cysteine and histidine-rich domain-containing protein 1	510873	402967	353533	479433	353533
Q9UJS0;O75746	Calcium-binding mitochondrial carrier protein Aralar2;Calcium-binding mitochondrial carrier protein Aralar1	0	0	356367	0	356367
Q9UJU6	Drebrin-like protein	0	0	308573	250113	308573
Q9UK76	Hematological and neurological expressed 1 protein;Hematological and neurological expressed 1 protein, N-terminally processed	0	0	529300	0	529300
Q9UKK9	ADP-sugar pyrophosphatase	2.21407e+06	3.60105e+06	3.90457e+06	2494200	3.90457e+06
Q9ULC4	Malignant T-cell-amplified sequence 1	0	0	589200	0	589200
Q9UPW6	DNA-binding protein SATB2	1913500	971467	1.82879e+06	0	1.82879e+06
Q9UQ88;P21127	Cyclin-dependent kinase 11A;Cyclin-dependent kinase 11B	367167	222913	0	0	0
Q9Y2R5	28S ribosomal protein S17, mitochondrial	0	0	544733	0	544733
Q9Y6H1;Q5T1J5	Coiled-coil-helix-coiled-coil-helix domain-containing protein 2;Putative coiled-coil-helix-coiled-coil-helix domain-containing protein CHCHD2P9, mitochondrial	1329740	1.09953e+06	811433	493600	811433
P26599	Polypyrimidine tract-binding protein 1	3.73887e+06	2.58409e+06	4.78934e+06	3.09277e+06	4.78934e+06
Q01844	RNA-binding protein EWS	2.80438e+06	2.29283e+06	4.28973e+06	3.12483e+06	4.28973e+06
Q09161	Nuclear cap-binding protein subunit 1	3.4929e+06	2155890	3.28497e+06	2.42401e+06	3.28497e+06
Q13547	Histone deacetylase 1	2589870	1.47208e+06	2333180	2.69259e+06	2333180
Q6IN85	Serine/threonine-protein phosphatase 4 regulatory subunit 3A	2859690	1.26123e+06	2043910	1.47557e+06	2043910
Q92598;P34932;O95757	Heat shock protein 105 kDa;Heat shock 70 kDa protein 4;Heat shock 70 kDa protein 4L	7393700	8.73297e+06	10269000	9.67563e+06	10269000
CON__P08779;P08779;CON__A2A4G1;CON__P19001;CON__P19012;P19012;CON__P02533;P02533;CON__Q6IFX2;CON__Q04695;Q04695	Keratin, type I cytoskeletal 16;Keratin, type I cytoskeletal 15;Keratin, type I cytoskeletal 14;Keratin, type I cytoskeletal 17	1.01067e+06	2.10583e+07	0	1466260	0
CON__P08779;P08779;CON__A2A4G1;CON__P19001;CON__Q99456;Q99456;CON__P19012;P19012;CON__P13645;P13645;CON__P02533;P02533;CON__Q04695;Q04695	Keratin, type I cytoskeletal 16;Keratin, type I cytoskeletal 12;Keratin, type I cytoskeletal 15;Keratin, type I cytoskeletal 10;Keratin, type I cytoskeletal 14;Keratin, type I cytoskeletal 17	1.15373e+06	6.44967e+06	0	1.39401e+06	0
O00148	ATP-dependent RNA helicase DDX39A	536300	0	635900	0	635900
O14545	TRAF-type zinc finger domain-containing protein 1	485510	104010	212757	179821	212757
O14980	Exportin-1	520600	0	248350	299907	248350
O15067	Phosphoribosylformylglycinamidine synthase	259543	0	215560	0	215560
O43491	Band 4.1-like protein 2	909400	0	287320	0	287320
O60684	Importin subunit alpha-7	1.35057e+06	377233	439083	1.03211e+06	439083
P08670;P17661	Vimentin;Desmin	671233	0	674300	0	674300
P11310	Medium-chain specific acyl-CoA dehydrogenase, mitochondrial	251667	0	139303	90863.3	139303
P11940;Q4VXU2	Polyadenylate-binding protein 1;Polyadenylate-binding protein 1-like	2.04567e+06	667967	2476900	2037200	2476900
P14678	Small nuclear ribonucleoprotein-associated proteins B and B	7964.33	0	12188.7	8336.33	12188.7
P16949	Stathmin	815240	101050	1095490	818777	1095490
P27635;Q96L21	60S ribosomal protein L10;60S ribosomal protein L10-like	752167	0	261783	748957	261783
P30050	60S ribosomal protein L12	363267	0	125210	0	125210
P42771	Cyclin-dependent kinase inhibitor 2A	220140	196797	1064320	963473	1064320
P62877	E3 ubiquitin-protein ligase RBX1;E3 ubiquitin-protein ligase RBX1, N-terminally processed	365633	0	197743	233583	197743
P63241;Q6IS14	Eukaryotic translation initiation factor 5A-1;Eukaryotic translation initiation factor 5A-1-like	1.15117e+06	716567	2.16523e+06	2534010	2.16523e+06
P67809;P16989	Nuclease-sensitive element-binding protein 1;Y-box-binding protein 3	537027	473833	1.02556e+06	358767	1.02556e+06
P68133;P68032;P63267;P62736	Actin, alpha skeletal muscle;Actin, alpha cardiac muscle 1;Actin, gamma-enteric smooth muscle;Actin, aortic smooth muscle	2407300	1020200	3.73177e+06	0	3.73177e+06
Q15007	Pre-mRNA-splicing regulator WTAP	283990	0	728263	152827	728263
Q15021	Condensin complex subunit 1	592233	232680	748693	283773	748693
Q15042	Rab3 GTPase-activating protein catalytic subunit	710800	0	248987	352700	248987
Q3MHD2	Protein LSM12 homolog	674050	455200	1.11947e+06	849347	1.11947e+06
Q4V348	Zinc finger protein 658B	2.04353e+06	0	226513	0	226513
Q5T653	39S ribosomal protein L2, mitochondrial	875587	600533	0	411667	0
Q8NI27	THO complex subunit 2	533267	0	207517	0	207517
Q96CS2	HAUS augmin-like complex subunit 1	430767	0	206493	0	206493
Q96CX2	BTB/POZ domain-containing protein KCTD12	518533	0	365200	0	365200
Q99426	Tubulin-folding cofactor B	383000	0	979333	0	979333
Q9BWF3	RNA-binding protein 4	357483	191440	0	0	0
Q9NQT5	Exosome complex component RRP40	224477	0	307163	364317	307163
Q9NXV2;Q14681;Q8N5Z5	BTB/POZ domain-containing protein KCTD5;BTB/POZ domain-containing protein KCTD2;BTB/POZ domain-containing protein KCTD17	484590	163190	795677	114833	795677
Q9Y247;Q14320	Protein FAM50B;Protein FAM50A	165543	0	294940	198963	294940
Q9Y4L1	Hypoxia up-regulated protein 1	627000	0	332437	459400	332437
Q9Y5Y2	Cytosolic Fe-S cluster assembly factor NUBP2	387133	0	336500	472100	336500
O94763	Unconventional prefoldin RPB5 interactor 1	1.0245e+06	544347	97876.7	0	97876.7
P04264;CON__P04264;CON__H-INV:HIT000016045;P04259;CON__P02538;P02538;CON__Q8VED5;CON__P48668;P48668;CON__P13647;P13647;CON__P04259;CON__P05787;P05787	Keratin, type II cytoskeletal 1;Keratin, type II cytoskeletal 6B;Keratin, type II cytoskeletal 6A;Keratin, type II cytoskeletal 6C;Keratin, type II cytoskeletal 5;Keratin, type II cytoskeletal 8	9428300	4.42723e+06	1.08697e+06	1.59556e+07	1.08697e+06
P62847	40S ribosomal protein S24	2.40591e+06	1.2075e+06	1.90723e+06	915933	1.90723e+06
Q00341	Vigilin	875167	997683	0	316990	0
Q9Y2S7	Polymerase delta-interacting protein 2	2.16639e+06	815400	584200	616800	584200
P06454	Prothymosin alpha;Prothymosin alpha, N-terminally processed;Thymosin alpha-1	3354420	2.88937e+06	3.84357e+06	3.29463e+06	3.84357e+06
Q9NZI8	Insulin-like growth factor 2 mRNA-binding protein 1	2.29743e+06	2039120	1.94767e+06	1.58162e+06	1.94767e+06
P50402	Emerin	2.7613e+06	2.41596e+06	2.49546e+06	2098060	2.49546e+06
O75369;P21333	Filamin-B;Filamin-A	461160	0	326953	976333	326953
P04350	Tubulin beta-4A chain	16843500	0	2.49423e+07	2.87177e+07	2.49423e+07
P17858	ATP-dependent 6-phosphofructokinase, liver type	700427	0	379333	0	379333
P46779	60S ribosomal protein L28	886627	0	526900	921567	526900
Q08378	Golgin subfamily A member 3	1.03743e+06	0	738067	0	738067
Q7Z5K2	Wings apart-like protein homolog	998733	0	139977	204517	139977
Q9P1Y5;Q5T5Y3	Calmodulin-regulated spectrin-associated protein 3;Calmodulin-regulated spectrin-associated protein 1	2.20697e+06	0	1.68823e+06	958600	1.68823e+06
Q9UGP4	LIM domain-containing protein 1	2.1678e+06	772467	1918300	1.77193e+06	1918300
Q9UKX7	Nuclear pore complex protein Nup50	575293	0	341200	0	341200
CON__P07477;P07477;Q8NHM4;P07478	Trypsin-1;Alpha-trypsin chain 1;Alpha-trypsin chain 2;Putative trypsin-6;Trypsin-2	29674500	2.72859e+07	1.95231e+07	2.06739e+06	1.95231e+07
P21912	Succinate dehydrogenase [ubiquinone] iron-sulfur subunit, mitochondrial	3652620	1573710	1490000	1624500	1490000
P26639	Threonine--tRNA ligase, cytoplasmic	1.81294e+06	8076100	5225470	7.85045e+06	5225470
Q13015	Protein AF1q	890367	266117	0	1110530	0
Q9BY77	Polymerase delta-interacting protein 3	2.47766e+06	1.31004e+06	1049600	1.65403e+06	1049600
Q9C0C9	E2/E3 hybrid ubiquitin-protein ligase UBE2O	1207600	320073	926200	1408300	926200
O60610	Protein diaphanous homolog 1	1.07677e+07	7325070	11612600	1.00346e+07	11612600
P32322	Pyrroline-5-carboxylate reductase 1, mitochondrial	6.32288e+06	2.99854e+06	4055220	3.33573e+06	4055220
P13489	Ribonuclease inhibitor	719927	0	1183500	775480	1183500
P30622	CAP-Gly domain-containing linker protein 1	8.14813e+06	7559980	1.09844e+07	5.48529e+06	1.09844e+07
P55060	Exportin-2	1703790	354367	0	1023180	0
Q02952	A-kinase anchor protein 12	753153	0	407333	0	407333
Q16877	6-phosphofructo-2-kinase/fructose-2,6-bisphosphatase 4;6-phosphofructo-2-kinase;Fructose-2,6-bisphosphatase	1549340	0	301240	715293	301240
Q9Y5K6	CD2-associated protein	1.16448e+06	0	283257	1.40947e+06	283257
Q9Y6Y8	SEC23-interacting protein	2.11394e+06	0	321400	287080	321400
Q9UNS2	COP9 signalosome complex subunit 3	5110460	2.44132e+06	1.87578e+06	2.36093e+06	1.87578e+06
P08708	40S ribosomal protein S17	1.2312e+07	1.02275e+07	7.66143e+06	9395740	7.66143e+06
Q9H0G5	Nuclear speckle splicing regulatory protein 1	2.40363e+06	2771020	3.16311e+06	1779510	3.16311e+06
P60660	Myosin light polypeptide 6	1.73312e+07	18806600	2.14885e+07	15817200	2.14885e+07
P35613	Basigin	7222910	1.70758e+07	2.44422e+07	1.69358e+07	2.44422e+07
P27348	14-3-3 protein theta	2.96032e+07	3.61151e+07	3.84528e+07	26176880	3.84528e+07
Q14103	Heterogeneous nuclear ribonucleoprotein D0	2.22311e+07	2.18419e+07	21589010	2.42494e+07	21589010
P50552	Vasodilator-stimulated phosphoprotein	2.16774e+06	3578160	4636610	2.0489e+06	4636610
Q15428	Splicing factor 3A subunit 2	1.26424e+07	15344470	2.15882e+07	1.0508e+07	2.15882e+07
Q16875;O60825	6-phosphofructo-2-kinase/fructose-2,6-bisphosphatase 3;6-phosphofructo-2-kinase;Fructose-2,6-bisphosphatase;6-phosphofructo-2-kinase/fructose-2,6-bisphosphatase 2;6-phosphofructo-2-kinase;Fructose-2,6-bisphosphatase	3.15094e+07	2.92642e+07	3.52091e+07	21743800	3.52091e+07
O43707;P35609;Q08043;P12814	Alpha-actinin-4;Alpha-actinin-2;Alpha-actinin-3;Alpha-actinin-1	3.85766e+06	4.54857e+06	6.49223e+06	2.79853e+06	6.49223e+06
O75832	26S proteasome non-ATPase regulatory subunit 10	4640300	8.05929e+06	13204250	7.38943e+06	13204250
Q9UHV9	Prefoldin subunit 2	1.65056e+07	21612800	26128330	2.23361e+07	26128330
P14174	Macrophage migration inhibitory factor	9.29507e+06	16308900	16121000	1.43927e+07	16121000
P28072	Proteasome subunit beta type-6	1.68396e+07	3.30306e+07	3.54392e+07	21206600	3.54392e+07
P33176;O60282	Kinesin-1 heavy chain;Kinesin heavy chain isoform 5C	1.30472e+07	1.26212e+07	14529840	9.50073e+06	14529840
Q08211	ATP-dependent RNA helicase A	4.50254e+06	6261600	5.65711e+06	4051940	5.65711e+06
Q16630	Cleavage and polyadenylation specificity factor subunit 6	1.15568e+07	9248560	13305650	11324280	13305650
P37108	Signal recognition particle 14 kDa protein	1.37743e+07	10897760	1.21409e+07	1.1384e+07	1.21409e+07
Q92734	Protein TFG	9428660	6.70573e+06	9.37452e+06	6.65227e+06	9.37452e+06
O95721	Synaptosomal-associated protein 29	6586570	6.05327e+06	4.97676e+06	4.73814e+06	4.97676e+06
Q9NYJ8	TGF-beta-activated kinase 1 and MAP3K7-binding protein 2	2.6269e+08	2.01095e+08	2.03157e+08	2.0191e+08	2.03157e+08
Q05639	Elongation factor 1-alpha 2	2.23894e+07	2.21748e+07	2.508e+07	1.97062e+07	2.508e+07
Q9P258	Protein RCC2	4.24136e+06	4.52956e+06	7.81447e+06	5988500	7.81447e+06
P60900	Proteasome subunit alpha type-6	4.50923e+07	7.09781e+07	8.26923e+07	6.22052e+07	8.26923e+07
P62633	Cellular nucleic acid-binding protein	82180160	71392530	91014070	6.57935e+07	91014070
P68133;P68032;P63267;P62736;P60709;P63261	Actin, alpha skeletal muscle;Actin, alpha cardiac muscle 1;Actin, gamma-enteric smooth muscle;Actin, aortic smooth muscle;Actin, cytoplasmic 1;Actin, cytoplasmic 1, N-terminally processed;Actin, cytoplasmic 2;Actin, cytoplasmic 2, N-terminally processed	1.22082e+08	1.07988e+08	1.4312e+08	102801800	1.4312e+08
Q9Y657	Spindlin-1	5.24876e+08	443585580	4.61556e+08	3.98968e+08	4.61556e+08
CON__P00761		5.62586e+09	6886262380	5.34714e+09	5.86218e+09	5.34714e+09
Q15046	Lysine--tRNA ligase	5.78856e+06	6337960	8.80358e+06	6.22146e+06	8.80358e+06
P46776	60S ribosomal protein L27a	15153550	1.06388e+07	14789740	1.03678e+07	14789740
P51649	Succinate-semialdehyde dehydrogenase, mitochondrial	104190250	6.31768e+07	5.4726e+07	6.21546e+07	5.4726e+07
P61247	40S ribosomal protein S3a	2.25054e+07	1.84922e+07	2.18664e+07	1.44679e+07	2.18664e+07
CON__Q04695;Q04695	Keratin, type I cytoskeletal 17	1.20398e+06	2.30213e+08	499287	361973	499287
P04792	Heat shock protein beta-1	978733	1.54943e+07	754267	618957	754267
P05023	Sodium/potassium-transporting ATPase subunit alpha-1	4270210	9.83254e+06	1.56457e+07	1.10949e+07	1.56457e+07
Q07021	Complement component 1 Q subcomponent-binding protein, mitochondrial	41468730	15280220	3.43947e+07	1.39268e+07	3.43947e+07
P06702	Protein S100-A9	0	8.37993e+08	699207	129943	699207
Q15750	TGF-beta-activated kinase 1 and MAP3K7-binding protein 1	7.08464e+08	7.41237e+08	8.32476e+08	7.66576e+08	8.32476e+08
P54105	Methylosome subunit pICln	5.11005e+08	6.43883e+08	5.35614e+08	554940450	5.35614e+08
P46777	60S ribosomal protein L5	1.54902e+07	9563540	1.59707e+07	1.63843e+07	1.59707e+07
P62306	Small nuclear ribonucleoprotein F	8481140	9.61886e+06	1.80611e+07	9.90043e+06	1.80611e+07
Q9Y657;Q5JUX0	Spindlin-1;Spindlin-3	30541300	24038200	2.10588e+07	2.56123e+07	2.10588e+07
Q9NTJ3	Structural maintenance of chromosomes protein 4	6.55305e+06	5.34767e+06	6.64286e+06	5.68381e+06	6.64286e+06
P27816	Microtubule-associated protein 4	29897170	29349750	39050890	26205490	39050890
P07339	Cathepsin D;Cathepsin D light chain;Cathepsin D heavy chain	78483.3	2.44765e+07	360533	0	360533
P04259;CON__P02538;P02538;CON__P48668;P48668;CON__P04259	Keratin, type II cytoskeletal 6B;Keratin, type II cytoskeletal 6A;Keratin, type II cytoskeletal 6C	1.82094e+06	1.8011e+08	610770	162453	610770
Q32MZ4	Leucine-rich repeat flightless-interacting protein 1	10746390	1.11767e+07	1.24751e+07	8589960	1.24751e+07
P07437	Tubulin beta chain	1.25682e+08	1.16669e+08	1.88086e+08	138249510	1.88086e+08
P08238;P07900	Heat shock protein HSP 90-beta;Heat shock protein HSP 90-alpha	5.29424e+07	4.61497e+07	6.14378e+07	4.36087e+07	6.14378e+07
Q15942	Zyxin	1.41596e+07	10704750	1.71284e+07	1.06243e+07	1.71284e+07
P07900	Heat shock protein HSP 90-alpha	231356770	2.1169e+08	2.88975e+08	201256170	2.88975e+08
P68104;Q5VTE0;Q05639	Elongation factor 1-alpha 1;Putative elongation factor 1-alpha-like 3;Elongation factor 1-alpha 2	2.07167e+08	2.33112e+08	2.82152e+08	1.7701e+08	2.82152e+08
P35813	Protein phosphatase 1A	1.52066e+08	1.15781e+08	1.44851e+08	114319050	1.44851e+08
P23246	Splicing factor, proline- and glutamine-rich	3.85182e+07	28211060	3.41569e+07	2.46216e+07	3.41569e+07
Q86V81	THO complex subunit 4	1.05084e+07	4.90405e+06	7.05805e+06	9.98674e+06	7.05805e+06
P12532	Creatine kinase U-type, mitochondrial	7302020	9367910	8.43284e+06	8.33643e+06	8.43284e+06
P00441	Superoxide dismutase [Cu-Zn]	4.71811e+06	1.02446e+07	9783950	3.07208e+06	9783950
P61978	Heterogeneous nuclear ribonucleoprotein K	1.70669e+08	1.82402e+08	1.99627e+08	1.81314e+08	1.99627e+08
P27708	CAD protein;Glutamine-dependent carbamoyl-phosphate synthase;Aspartate carbamoyltransferase;Dihydroorotase	38422500	4.0888e+07	48446980	34540370	48446980
P47929	Galectin-7	0	1.96885e+07	249803	0	249803
P49327	Fatty acid synthase;[Acyl-carrier-protein] S-acetyltransferase;[Acyl-carrier-protein] S-malonyltransferase;3-oxoacyl-[acyl-carrier-protein] synthase;3-oxoacyl-[acyl-carrier-protein] reductase;3-hydroxyacyl-[acyl-carrier-protein] dehydratase;Enoyl-[acyl-carrier-protein] reductase;Oleoyl-[acyl-carrier-protein] hydrolase	1.62035e+08	1.88632e+08	2.38696e+08	1.68637e+08	2.38696e+08
Q9UNM6	26S proteasome non-ATPase regulatory subunit 13	2.43009e+07	24989530	4.14839e+07	24378530	4.14839e+07
P07858	Cathepsin B;Cathepsin B light chain;Cathepsin B heavy chain	3.68467e+06	1.93558e+07	513833	2970980	513833
P14618	Pyruvate kinase PKM	41129400	4.96548e+07	5.30624e+07	3.0045e+07	5.30624e+07
		4.34667e+07	6.07667e+07	70000000	60400000	70000000
Q5T749	Keratinocyte proline-rich protein	143357	7722530	292260	113597	292260
P07355	Annexin A2	439703	1.07951e+07	188680	161687	188680
P07237	Protein disulfide-isomerase	4.24115e+06	4.30065e+06	6.74081e+06	2.60127e+06	6.74081e+06
P62937	Peptidyl-prolyl cis-trans isomerase A;Peptidyl-prolyl cis-trans isomerase A, N-terminally processed	5.88781e+07	92545400	1.12325e+08	8.00193e+07	1.12325e+08
P04350;P68371;P07437;Q13885;Q9BVA1	Tubulin beta-4A chain;Tubulin beta-4B chain;Tubulin beta chain;Tubulin beta-2A chain;Tubulin beta-2B chain	88397710	100287590	1.6243e+08	102735490	1.6243e+08
O00487	26S proteasome non-ATPase regulatory subunit 14	2100010	8402260	1.3053e+07	9.98682e+06	1.3053e+07
Q5W0B1	RING finger protein 219	1.15267e+07	1.13423e+07	1.36238e+07	8.77447e+06	1.36238e+07
P49721	Proteasome subunit beta type-2	5.93464e+06	7750140	1.23597e+07	6547980	1.23597e+07
Q5JUX0	Spindlin-3	2.48838e+07	1.57591e+07	1.76703e+07	15702270	1.76703e+07
P61254;Q9UNX3	60S ribosomal protein L26;60S ribosomal protein L26-like 1	1.56334e+07	1.63573e+07	1.98946e+07	1.52553e+07	1.98946e+07
P47756	F-actin-capping protein subunit beta	1.28599e+07	1.51384e+07	20159400	10712670	20159400
P84098	60S ribosomal protein L19	1.65561e+07	1.59554e+07	1.3962e+07	12448830	1.3962e+07
Q13642	Four and a half LIM domains protein 1	1.85894e+07	1.62476e+07	2.27389e+07	2.09266e+07	2.27389e+07
Q99733	Nucleosome assembly protein 1-like 4	2346000	1.75559e+06	4412250	2.2756e+06	4412250
Q8ND83	SLAIN motif-containing protein 1	241333	504837	1.848e+06	1.03102e+06	1.848e+06
Q96AE4	Far upstream element-binding protein 1	799267	929980	110900	816520	110900
O00193	Small acidic protein	2.52767e+06	2.15637e+06	4849400	2.71871e+06	4849400
P47813;O14602	Eukaryotic translation initiation factor 1A, X-chromosomal;Eukaryotic translation initiation factor 1A, Y-chromosomal	3.52443e+06	3856600	6356460	3933800	6356460
P51991	Heterogeneous nuclear ribonucleoprotein A3	2.60183e+06	3.52834e+06	1902700	917687	1902700
Q9Y6D9	Mitotic spindle assembly checkpoint protein MAD1	1.89887e+06	1204500	878233	356320	878233
O43390	Heterogeneous nuclear ribonucleoprotein R	1807600	754100	1850050	1.57867e+06	1850050
P46783	40S ribosomal protein S10	4.63059e+06	2.34238e+06	7209970	2.70052e+06	7209970
Q05048	Cleavage stimulation factor subunit 1	1.60825e+06	157273	1499400	586117	1499400
P52292	Importin subunit alpha-1	4.57794e+06	6.11629e+06	9.86139e+06	6.69742e+06	9.86139e+06
O60884	DnaJ homolog subfamily A member 2	1.40276e+06	7.54867e+06	1.06412e+07	7.84953e+06	1.06412e+07
Q9Y2H8	Zinc finger protein 510	0	8.09433e+06	3.84847e+06	6.79318e+06	3.84847e+06
P05141;P12236	ADP/ATP translocase 2;ADP/ATP translocase 2, N-terminally processed;ADP/ATP translocase 3;ADP/ATP translocase 3, N-terminally processed	857593	3629770	4.25356e+06	2.98851e+06	4.25356e+06
P62258	14-3-3 protein epsilon	6.24001e+07	7.94945e+07	104245850	7.64552e+07	104245850
P49411	Elongation factor Tu, mitochondrial	150640770	1.25921e+08	1.42065e+08	121617010	1.42065e+08
O60763	General vesicular transport factor p115	9235620	5.64342e+06	9.50671e+06	7159860	9.50671e+06
P62136;P36873;P62140	Serine/threonine-protein phosphatase PP1-alpha catalytic subunit;Serine/threonine-protein phosphatase PP1-gamma catalytic subunit;Serine/threonine-protein phosphatase PP1-beta catalytic subunit	1.0249e+06	1.62569e+06	951633	682323	951633
Q92599	Septin-8	4.1686e+06	3.97261e+06	6673780	3.82913e+06	6673780
Q9HAV7	GrpE protein homolog 1, mitochondrial	1.93553e+06	2.03847e+06	2.22637e+06	777543	2.22637e+06
P34897	Serine hydroxymethyltransferase, mitochondrial	5.12822e+06	3.11353e+06	4.65837e+06	1.66245e+06	4.65837e+06
O43776	Asparagine--tRNA ligase, cytoplasmic	6.6578e+06	4.54038e+06	4.7588e+06	6.12741e+06	4.7588e+06
P60891;P11908	Ribose-phosphate pyrophosphokinase 1;Ribose-phosphate pyrophosphokinase 2	130897930	1.19663e+08	1.62929e+08	149916980	1.62929e+08
O43719	HIV Tat-specific factor 1	4.8259e+07	5.53502e+07	5.41157e+07	4.1486e+07	5.41157e+07
P60709;P63261	Actin, cytoplasmic 1;Actin, cytoplasmic 1, N-terminally processed;Actin, cytoplasmic 2;Actin, cytoplasmic 2, N-terminally processed	92132530	105347900	147001600	1.10348e+08	147001600
P67870	Casein kinase II subunit beta	1.83565e+07	1.56036e+07	1.83891e+07	1.23567e+07	1.83891e+07
P31948	Stress-induced-phosphoprotein 1	3.40218e+07	3.42166e+07	46272220	37082090	46272220
P35520	Cystathionine beta-synthase	1.28114e+07	1.76005e+07	2.18537e+07	1.03497e+07	2.18537e+07
O00232	26S proteasome non-ATPase regulatory subunit 12	1.70552e+07	13609480	20506340	13540700	20506340
Q92620	Pre-mRNA-splicing factor ATP-dependent RNA helicase PRP16	6.58043e+07	4.52296e+07	5.20874e+07	4.8772e+07	5.20874e+07
P31153	S-adenosylmethionine synthase isoform type-2	18595860	1.77564e+07	21814600	2.04163e+07	21814600
Q15008	26S proteasome non-ATPase regulatory subunit 6	15824320	1.49201e+07	2.29937e+07	1.41294e+07	2.29937e+07
Q99613;B5ME19	Eukaryotic translation initiation factor 3 subunit C;Eukaryotic translation initiation factor 3 subunit C-like protein	120910350	120961480	1.41853e+08	9.88053e+07	1.41853e+08
P46821	Microtubule-associated protein 1B;MAP1B heavy chain;MAP1 light chain LC1	23051080	18214170	26042500	1.62371e+07	26042500
Q9Y6Y0	Influenza virus NS1A-binding protein	6.54767e+08	654856080	9.59342e+08	7.55312e+08	9.59342e+08
P30041	Peroxiredoxin-6	5.676e+07	66351940	5.28059e+07	55939350	5.28059e+07
P30048	Thioredoxin-dependent peroxide reductase, mitochondrial	4355290	6.61516e+06	15151330	4853850	15151330
P07814	Bifunctional glutamate/proline--tRNA ligase;Glutamate--tRNA ligase;Proline--tRNA ligase	27609900	31478920	4.18522e+07	2.28758e+07	4.18522e+07
P0DMV9;P0DMV8	Heat shock 70 kDa protein 1B;Heat shock 70 kDa protein 1A	2.17199e+08	3.02839e+08	4.02261e+08	2.94373e+08	4.02261e+08
P11908	Ribose-phosphate pyrophosphokinase 2	5.49208e+07	4.57173e+07	4.59129e+07	5.57395e+07	4.59129e+07
P28066	Proteasome subunit alpha type-5	1.8045e+07	35442500	3.58764e+07	2.74144e+07	3.58764e+07
P31947	14-3-3 protein sigma	9.27823e+06	15145500	1.70093e+07	1.01303e+07	1.70093e+07
P13674	Prolyl 4-hydroxylase subunit alpha-1	2.26323e+06	1883640	3.42472e+06	2.05854e+06	3.42472e+06
Q06830	Peroxiredoxin-1	1.27906e+08	168282650	2.44371e+08	154808800	2.44371e+08
P38646	Stress-70 protein, mitochondrial	1.93418e+08	214493120	2.68011e+08	1.93457e+08	2.68011e+08
P14678;P63162	Small nuclear ribonucleoprotein-associated proteins B and B;Small nuclear ribonucleoprotein-associated protein N	245358400	1.77625e+08	2.85768e+08	225904250	2.85768e+08
Q9GZS3	WD repeat-containing protein 61;WD repeat-containing protein 61, N-terminally processed	3.75331e+06	3167000	6045400	4.49169e+06	6045400
CON__P13645;P13645;CON__P02535-1	Keratin, type I cytoskeletal 10	15442790	2.94204e+07	2.32328e+06	8.50933e+06	2.32328e+06
Q7L0Y3	Mitochondrial ribonuclease P protein 1	1.45054e+08	5.65739e+07	4.34064e+07	54603740	4.34064e+07
P15924	Desmoplakin	4513150	26114860	3.06148e+06	3.26687e+06	3.06148e+06
CON__P13645;P13645	Keratin, type I cytoskeletal 10	5.81447e+07	4.47308e+08	6272400	4.40625e+07	6272400
P35579	Myosin-9	8.84492e+07	123520680	135056170	75645520	135056170
P25786	Proteasome subunit alpha type-1	2.35205e+07	28064230	43998970	2.92452e+07	43998970
Q9BT78	COP9 signalosome complex subunit 4	2.47103e+06	3.49907e+06	6.09616e+06	2.19218e+06	6.09616e+06
Q70IA6	MOB kinase activator 2	8.04569e+07	7.14269e+07	62283630	5.11976e+07	62283630
O43707	Alpha-actinin-4	3.33983e+07	24017980	2.97826e+07	1.47242e+07	2.97826e+07
P98175	RNA-binding protein 10	2.44871e+09	1896892860	1931434540	1.56166e+09	1931434540
P25789	Proteasome subunit alpha type-4	1.53095e+07	24147750	20458720	2.10532e+07	20458720
P68363;P68366	Tubulin alpha-1B chain;Tubulin alpha-4A chain	24577740	5.3476e+07	61590300	5.8694e+07	61590300
P27824	Calnexin	15065540	22973020	2.83151e+07	2.1228e+07	2.83151e+07
P48556	26S proteasome non-ATPase regulatory subunit 8	4.62123e+06	5.22781e+06	7209600	5.90275e+06	7209600
Q9HB71	Calcyclin-binding protein	8.82238e+06	4.69187e+06	3.56147e+06	12931790	3.56147e+06
Q13283	Ras GTPase-activating protein-binding protein 1	1.0227e+07	11956900	9440800	1.18337e+07	9440800
Q99714	3-hydroxyacyl-CoA dehydrogenase type-2	1.16233e+08	9.90495e+07	81843410	9.44406e+07	81843410
P31689	DnaJ homolog subfamily A member 1	1.14855e+07	1.25567e+07	16341350	1.20177e+07	16341350
P06748	Nucleophosmin	3.80756e+07	62237140	3.98932e+07	4.89206e+07	3.98932e+07
P48643	T-complex protein 1 subunit epsilon	510475020	6.11218e+08	771608890	4.54681e+08	771608890
P11142;P54652	Heat shock cognate 71 kDa protein;Heat shock-related 70 kDa protein 2	1.5514e+08	2.01889e+08	2.39327e+08	1.89472e+08	2.39327e+08
P68363;Q9BQE3;Q71U36;Q13748;Q6PEY2	Tubulin alpha-1B chain;Tubulin alpha-1C chain;Tubulin alpha-1A chain;Tubulin alpha-3C/D chain;Tubulin alpha-3E chain	51205660	6.45115e+07	124221600	7.04162e+07	124221600
Q9H2G2	STE20-like serine/threonine-protein kinase	600100	1019850	1.46146e+06	900940	1.46146e+06
P30101	Protein disulfide-isomerase A3	1608740	4509520	2.24435e+06	2383690	2.24435e+06
Q15274	Nicotinate-nucleotide pyrophosphorylase [carboxylating]	1.054e+07	2.10116e+07	1.81522e+07	2.12222e+07	1.81522e+07
P61981;Q04917;P31946;P27348;P31947;P62258;P63104	14-3-3 protein gamma;14-3-3 protein gamma, N-terminally processed;14-3-3 protein eta;14-3-3 protein beta/alpha;14-3-3 protein beta/alpha, N-terminally processed;14-3-3 protein theta;14-3-3 protein sigma;14-3-3 protein epsilon;14-3-3 protein zeta/delta	1.14777e+07	1.23173e+07	1.35985e+07	1.30903e+07	1.35985e+07
Q14C86	GTPase-activating protein and VPS9 domain-containing protein 1	2.66077e+06	3.05448e+06	3.18247e+06	1540900	3.18247e+06
Q9H6T3	RNA polymerase II-associated protein 3	924533	1630400	1666200	1574900	1666200
O75396	Vesicle-trafficking protein SEC22b	0	795173	165123	668697	165123
O75940	Survival of motor neuron-related-splicing factor 30	0	737433	582167	0	582167
Q00610	Clathrin heavy chain 1	0	726600	881143	668287	881143
P62826	GTP-binding nuclear protein Ran	9.18367e+06	11097700	1.96012e+07	1.18542e+07	1.96012e+07
P09661	U2 small nuclear ribonucleoprotein A	584303	1.30158e+06	980373	1.41115e+06	980373
P04075;P09972	Fructose-bisphosphate aldolase A;Fructose-bisphosphate aldolase C	0	1274500	2.37067e+06	1955600	2.37067e+06
P08238;P07900;Q14568	Heat shock protein HSP 90-beta;Heat shock protein HSP 90-alpha;Heat shock protein HSP 90-alpha A2	253057	822117	861533	0	861533
P13995	Bifunctional methylenetetrahydrofolate dehydrogenase/cyclohydrolase, mitochondrial;NAD-dependent methylenetetrahydrofolate dehydrogenase;Methenyltetrahydrofolate cyclohydrolase	178437	437827	221307	408433	221307
P63167	Dynein light chain 1, cytoplasmic	579900	587737	1508940	132863	1508940
P0DMV9;P0DMV8;P17066;P48741;P34931	Heat shock 70 kDa protein 1B;Heat shock 70 kDa protein 1A;Heat shock 70 kDa protein 6;Putative heat shock 70 kDa protein 7;Heat shock 70 kDa protein 1-like	7597100	1.08777e+07	1.54345e+07	8.43073e+06	1.54345e+07
P68133;P68032;P63267;P62736;P60709;P63261;Q562R1	Actin, alpha skeletal muscle;Actin, alpha cardiac muscle 1;Actin, gamma-enteric smooth muscle;Actin, aortic smooth muscle;Actin, cytoplasmic 1;Actin, cytoplasmic 1, N-terminally processed;Actin, cytoplasmic 2;Actin, cytoplasmic 2, N-terminally processed;Beta-actin-like protein 2	1.2061e+07	1.82512e+07	23298620	1.60115e+07	23298620
Q9H773	dCTP pyrophosphatase 1	1.08614e+06	1.89691e+06	2.05933e+06	1.02076e+06	2.05933e+06
P62280	40S ribosomal protein S11	1.18773e+07	1.65734e+07	1.93251e+07	1.25393e+07	1.93251e+07
O00148;Q13838	ATP-dependent RNA helicase DDX39A;Spliceosome RNA helicase DDX39B	962147	1.81263e+06	1.30237e+06	1830620	1.30237e+06
O43684	Mitotic checkpoint protein BUB3	914047	919923	1.0971e+06	1.59704e+06	1.0971e+06
P22392;O60361;P15531	Nucleoside diphosphate kinase B;Putative nucleoside diphosphate kinase;Nucleoside diphosphate kinase A	2659280	2.56846e+06	5.10857e+06	2180990	5.10857e+06
P35908;CON__P35908;P04259;CON__P02538;P02538;CON__O95678;O95678;CON__Q8VED5;CON__P48668;P48668;CON__P13647;P13647;CON__Q5XKE5;Q5XKE5;CON__P04259	Keratin, type II cytoskeletal 2 epidermal;Keratin, type II cytoskeletal 6B;Keratin, type II cytoskeletal 6A;Keratin, type II cytoskeletal 75;Keratin, type II cytoskeletal 6C;Keratin, type II cytoskeletal 5;Keratin, type II cytoskeletal 79	4931200	36066800	874033	1.16967e+07	874033
P56192	Methionine--tRNA ligase, cytoplasmic	1427100	1.89107e+06	1.30918e+06	903067	1.30918e+06
P61758	Prefoldin subunit 3	2.0262e+06	1.72586e+06	3368150	4.15397e+06	3368150
P61962	DDB1- and CUL4-associated factor 7	1.70657e+06	2.13383e+06	413757	2.67453e+06	413757
Q9BQ67	Glutamate-rich WD repeat-containing protein 1	1.31575e+06	766950	1.42572e+06	432467	1.42572e+06
Q9NQ92	Coordinator of PRMT5 and differentiation stimulator	52728600	42695760	5.86095e+07	4.47933e+07	5.86095e+07
P14854	Cytochrome c oxidase subunit 6B1	844837	633600	779400	656980	779400
P54819	Adenylate kinase 2, mitochondrial;Adenylate kinase 2, mitochondrial, N-terminally processed	960333	664467	1.73937e+06	1.49453e+06	1.73937e+06
P12814	Alpha-actinin-1	5.02744e+06	4.6749e+06	3880560	3.61395e+06	3880560
P14618;P30613	Pyruvate kinase PKM;Pyruvate kinase PKLR	3.18393e+06	2.55356e+06	2.40588e+06	1.96553e+06	2.40588e+06
P78527	DNA-dependent protein kinase catalytic subunit	3.15757e+06	2742980	3910110	2.7708e+06	3910110
CON__P13645;P13645;CON__Q148H6;CON__Q7Z3Y7;Q7Z3Y7;CON__Q7Z3Z0;CON__Q7Z3Y8;Q7Z3Z0;Q7Z3Y8	Keratin, type I cytoskeletal 10;Keratin, type I cytoskeletal 28;Keratin, type I cytoskeletal 25;Keratin, type I cytoskeletal 27	4.68053e+06	1.76713e+07	1.05947e+06	3.54253e+06	1.05947e+06
P82921	28S ribosomal protein S21, mitochondrial	3.53055e+06	1.8912e+06	2408040	1.5967e+06	2408040
Q7Z4H8	KDEL motif-containing protein 2	4242340	1707360	1314850	1.63841e+06	1314850
Q92552	28S ribosomal protein S27, mitochondrial	1.84212e+06	687100	1608800	946833	1608800
Q9HA64	Ketosamine-3-kinase	2.09111e+06	1.60521e+06	2677050	2282570	2677050
Q9UPN9	E3 ubiquitin-protein ligase TRIM33	1.80147e+06	616300	564663	553897	564663
Q86YP4	Transcriptional repressor p66-alpha	4409070	2.87234e+06	2.48127e+06	1.5296e+06	2.48127e+06
Q9UPQ9	Trinucleotide repeat-containing gene 6B protein	1.67476e+07	8744510	1.29938e+07	7.93401e+06	1.29938e+07
P12004	Proliferating cell nuclear antigen	26485250	30786370	35936710	3.09042e+07	35936710
Q9H3K6	BolA-like protein 2	1.70243e+08	1.84505e+08	1.71916e+08	1.30222e+08	1.71916e+08
Q96J01	THO complex subunit 3	1.94169e+07	25103940	2.9219e+07	2.41447e+07	2.9219e+07
P51571	Translocon-associated protein subunit delta	3.29112e+06	3413400	5.73887e+06	1803880	5.73887e+06
Q04917	14-3-3 protein eta	1.06822e+07	1.24862e+07	15988970	7888410	15988970
P49458	Signal recognition particle 9 kDa protein	5680020	7107340	11709500	5.63767e+06	11709500
Q3V6T2	Girdin	5.01339e+06	4.86771e+06	6.46778e+06	5030610	6.46778e+06
Q92905	COP9 signalosome complex subunit 5	2.71883e+06	4306220	5.52783e+06	3.08284e+06	5.52783e+06
P15311	Ezrin	3.84215e+06	3.0969e+06	2.66965e+06	3.72393e+06	2.66965e+06
Q14247	Src substrate cortactin	2.84741e+07	2.09002e+07	2.67418e+07	23273990	2.67418e+07
P40227;Q92526	T-complex protein 1 subunit zeta;T-complex protein 1 subunit zeta-2	21381070	2.17585e+07	35901050	1.74367e+07	35901050
P62314	Small nuclear ribonucleoprotein Sm D1	1.03235e+08	1.3234e+08	9.92656e+07	9.63242e+07	9.92656e+07
O75400	Pre-mRNA-processing factor 40 homolog A	7.66972e+06	6.42933e+06	6.40951e+06	7.64655e+06	6.40951e+06
P42025;P61163	Beta-centractin;Alpha-centractin	13614500	9094600	13226500	7538470	13226500
Q14839;Q8TDI0;Q12873	Chromodomain-helicase-DNA-binding protein 4;Chromodomain-helicase-DNA-binding protein 5;Chromodomain-helicase-DNA-binding protein 3	1.10412e+07	7.41792e+06	9.43839e+06	4978090	9.43839e+06
P46782	40S ribosomal protein S5;40S ribosomal protein S5, N-terminally processed	7542790	4513050	5.26473e+06	5.47944e+06	5.26473e+06
P0DMV9;P0DMV8;P34931	Heat shock 70 kDa protein 1B;Heat shock 70 kDa protein 1A;Heat shock 70 kDa protein 1-like	1.38267e+08	1.91667e+08	2.37532e+08	1.85334e+08	2.37532e+08
P07355;A6NMY6	Annexin A2;Putative annexin A2-like protein	1.17525e+06	28574720	2.361e+06	1.19174e+06	2.361e+06
Q99615	DnaJ homolog subfamily C member 7	2.94024e+07	3.0767e+07	2.17119e+07	2.97197e+07	2.17119e+07
P12268	Inosine-5-monophosphate dehydrogenase 2	3.28879e+07	3.11037e+07	3.07248e+07	2.40354e+07	3.07248e+07
P68133;P68032	Actin, alpha skeletal muscle;Actin, alpha cardiac muscle 1	6371790	2.09893e+07	2.81111e+07	20677840	2.81111e+07
O14744	Protein arginine N-methyltransferase 5;Protein arginine N-methyltransferase 5, N-terminally processed	7.0373e+09	7.35955e+09	7.81787e+09	6.4888e+09	7.81787e+09
Q99873	Protein arginine N-methyltransferase 1	1.15191e+07	12767500	1.17878e+07	7.9903e+06	1.17878e+07
P04181	Ornithine aminotransferase, mitochondrial;Ornithine aminotransferase, hepatic form;Ornithine aminotransferase, renal form	4805260	3.86647e+06	6.45036e+06	1.40564e+06	6.45036e+06
Q9Y490	Talin-1	9262240	4.47853e+06	4.54167e+06	3.45648e+06	4.54167e+06
O95347	Structural maintenance of chromosomes protein 2	8.75719e+06	4.73469e+06	7.93534e+06	4.54833e+06	7.93534e+06
Q96DI7	U5 small nuclear ribonucleoprotein 40 kDa protein	8.21677e+06	13852280	1.8436e+07	1.33676e+07	1.8436e+07
P55795	Heterogeneous nuclear ribonucleoprotein H2	7.98236e+06	1.03099e+07	9.56879e+06	9787670	9.56879e+06
Q13045	Protein flightless-1 homolog	7.25769e+06	5217940	6.51712e+06	4.7592e+06	6.51712e+06
Q14203	Dynactin subunit 1	3.62309e+07	34650140	4.42306e+07	2.6848e+07	4.42306e+07
Q99460	26S proteasome non-ATPase regulatory subunit 1	1.98281e+07	2.20736e+07	38671970	20911140	38671970
O60256	Phosphoribosyl pyrophosphate synthase-associated protein 2	1.94977e+08	1.50933e+08	1.75287e+08	1.85371e+08	1.75287e+08
P04406	Glyceraldehyde-3-phosphate dehydrogenase	7908620	5.79514e+07	2.95012e+07	1.5227e+07	2.95012e+07
O60343	TBC1 domain family member 4	7.52976e+06	4.98619e+06	5.76143e+06	4.02698e+06	5.76143e+06
P50991	T-complex protein 1 subunit delta	190902930	231738760	379232910	176825530	379232910
Q9Y2W1	Thyroid hormone receptor-associated protein 3	9.12421e+07	7.80197e+07	1.10973e+08	8.2138e+07	1.10973e+08
P68363;Q9BQE3;Q71U36	Tubulin alpha-1B chain;Tubulin alpha-1C chain;Tubulin alpha-1A chain	1.74052e+08	251936100	323745210	258826810	323745210
CON__P02769		2.86215e+07	3.76252e+07	24567890	2.66866e+07	24567890
P10599	Thioredoxin	144262990	1.97919e+08	203081940	1.66904e+08	203081940
P28070	Proteasome subunit beta type-4	2.85209e+06	5.68034e+06	7.05917e+06	5.46911e+06	7.05917e+06
P68363;P68366;Q9BQE3;Q71U36;Q13748	Tubulin alpha-1B chain;Tubulin alpha-4A chain;Tubulin alpha-1C chain;Tubulin alpha-1A chain;Tubulin alpha-3C/D chain	4.37641e+07	57861100	1.09344e+08	61735400	1.09344e+08
Q9UHX1	Poly(U)-binding-splicing factor PUF60	4.56804e+06	5.60278e+06	7745500	3.59675e+06	7745500
O15371	Eukaryotic translation initiation factor 3 subunit D	1.79109e+08	179365560	1.99235e+08	1.50606e+08	1.99235e+08
P28074	Proteasome subunit beta type-5	1.43968e+07	2.09085e+07	2.84681e+07	2.0567e+07	2.84681e+07
P55036	26S proteasome non-ATPase regulatory subunit 4	2.457e+07	2.62909e+07	3.08217e+07	16854350	3.08217e+07
Q04637	Eukaryotic translation initiation factor 4 gamma 1	22526290	1.92853e+07	2.34247e+07	1.77121e+07	2.34247e+07
Q16204	Coiled-coil domain-containing protein 6	1.38584e+06	1444780	1.47809e+06	1.32465e+06	1.47809e+06
O00233	26S proteasome non-ATPase regulatory subunit 9	693847	804030	2.63447e+06	1748890	2.63447e+06
O00571	ATP-dependent RNA helicase DDX3X	4.96996e+06	5.09194e+06	6.39736e+06	3.698e+06	6.39736e+06
P06753	Tropomyosin alpha-3 chain	8243200	1.42969e+07	1.30878e+07	7.00243e+06	1.30878e+07
Q13885;Q9BVA1	Tubulin beta-2A chain;Tubulin beta-2B chain	9755320	9274900	1.33296e+07	10770010	1.33296e+07
Q9Y4E1;Q641Q2	WASH complex subunit FAM21C;WASH complex subunit FAM21A	3.86627e+06	2.5836e+06	3.31648e+06	1.54176e+06	3.31648e+06
Q12931	Heat shock protein 75 kDa, mitochondrial	1.22572e+06	1.4734e+06	2480070	518783	2480070
P05455	Lupus La protein	8.7029e+06	7.67107e+06	1.15925e+07	6979980	1.15925e+07
P27635	60S ribosomal protein L10	9258830	1.19549e+07	1.24865e+07	1.07491e+07	1.24865e+07
P46060	Ran GTPase-activating protein 1	1.79146e+06	3.02523e+06	3.26373e+06	3.10409e+06	3.26373e+06
O60925	Prefoldin subunit 1	3205950	3.25652e+06	3.87439e+06	4.54134e+06	3.87439e+06
P62244	40S ribosomal protein S15a	4.7143e+06	2.48687e+06	2.67243e+06	1.83877e+06	2.67243e+06
Q8IWI9	MAX gene-associated protein	2.5503e+06	1.44465e+06	2.13957e+06	504797	2.13957e+06
P43487	Ran-specific GTPase-activating protein	7253880	9.96277e+06	1.24156e+07	6.5062e+06	1.24156e+07
P68363;P68366;Q9BQE3;Q71U36;Q13748;Q6PEY2	Tubulin alpha-1B chain;Tubulin alpha-4A chain;Tubulin alpha-1C chain;Tubulin alpha-1A chain;Tubulin alpha-3C/D chain;Tubulin alpha-3E chain	3.16691e+07	5.04048e+07	1.01835e+08	5.63709e+07	1.01835e+08
P00338	L-lactate dehydrogenase A chain	2.40048e+06	5.93416e+06	11764030	8652070	11764030
P09429;B2RPK0	High mobility group protein B1;Putative high mobility group protein B1-like 1	2652300	9.79443e+06	1.66553e+07	12773900	1.66553e+07
P16152	Carbonyl reductase [NADPH] 1	0	611147	1490400	252897	1490400
Q7Z4H7	HAUS augmin-like complex subunit 6	0	1081750	244477	1151690	244477
Q9UBN7	Histone deacetylase 6	4.18841e+06	5092180	9.31614e+06	1362360	9.31614e+06
Q15019	Septin-2	4.34668e+07	4.34829e+07	43370590	3.08342e+07	43370590
O15212	Prefoldin subunit 6	482947	1120830	1.7028e+06	1.95319e+06	1.7028e+06
O95816	BAG family molecular chaperone regulator 2	547817	1.26928e+06	795680	3.05899e+06	795680
CON__P08779;P08779;CON__Q9Z2K1;CON__Q3ZAW8;CON__A2A4G1;CON__P35900;CON__Q9D312;P35900;CON__P19012;P19012;CON__P02533;P02533;CON__Q6IFX2;CON__Q61782;CON__Q04695;Q04695	Keratin, type I cytoskeletal 16;Keratin, type I cytoskeletal 20;Keratin, type I cytoskeletal 15;Keratin, type I cytoskeletal 14;Keratin, type I cytoskeletal 17	97226.7	7612700	276180	752250	276180
P0DMV9;P0DMV8;P17066;P34931	Heat shock 70 kDa protein 1B;Heat shock 70 kDa protein 1A;Heat shock 70 kDa protein 6;Heat shock 70 kDa protein 1-like	0	592600	1821100	2.52427e+06	1821100
Q16527	Cysteine and glycine-rich protein 2	3304960	3320240	3.93148e+06	3.81512e+06	3.93148e+06
P10412;P16402;P16403	Histone H1.4;Histone H1.3;Histone H1.2	2.59463e+07	2.72516e+07	3.17634e+07	1.69406e+07	3.17634e+07
CON__P08779;P08779;CON__A2A4G1;CON__P13645;P13645;CON__P02533;P02533	Keratin, type I cytoskeletal 16;Keratin, type I cytoskeletal 10;Keratin, type I cytoskeletal 14	5.17253e+06	13446400	1445800	2.71713e+06	1445800
O95163	Elongator complex protein 1	886560	693440	650790	190120	650790
O15042	U2 snRNP-associated SURP motif-containing protein	3257700	2.09958e+06	1177850	484567	1177850
Q13151	Heterogeneous nuclear ribonucleoprotein A0	3.09007e+06	1.58993e+06	2654970	1310510	2654970
Q8TDY2	RB1-inducible coiled-coil protein 1	44881400	6.73957e+06	2302550	1.07919e+07	2302550
P63151	Serine/threonine-protein phosphatase 2A 55 kDa regulatory subunit B alpha isoform	2440000	501967	881617	1133990	881617
Q9NY27	Serine/threonine-protein phosphatase 4 regulatory subunit 2	2671150	754950	1938840	2.10253e+06	1938840
Q14315	Filamin-C	2848980	4893870	5.81715e+06	3.66731e+06	5.81715e+06
Q15369	Transcription elongation factor B polypeptide 1	1530180	3.77276e+06	4.64944e+06	2.2283e+06	4.64944e+06
P05141	ADP/ATP translocase 2;ADP/ATP translocase 2, N-terminally processed	31380240	3.69098e+07	4.15876e+07	4.80559e+07	4.15876e+07
Q16576	Histone-binding protein RBBP7	24885190	26211310	3.15757e+07	2.11664e+07	3.15757e+07
P04350;P68371;P07437	Tubulin beta-4A chain;Tubulin beta-4B chain;Tubulin beta chain	41943870	43548320	7.01761e+07	4.95532e+07	7.01761e+07
P68363;P68366;Q71U36;Q13748;Q6PEY2	Tubulin alpha-1B chain;Tubulin alpha-4A chain;Tubulin alpha-1A chain;Tubulin alpha-3C/D chain;Tubulin alpha-3E chain	39864000	6.97828e+07	8.75371e+07	69425910	8.75371e+07
P68363;P68366;A6NHL2;Q9BQE3;Q71U36;Q13748	Tubulin alpha-1B chain;Tubulin alpha-4A chain;Tubulin alpha chain-like 3;Tubulin alpha-1C chain;Tubulin alpha-1A chain;Tubulin alpha-3C/D chain	26547150	3.38676e+07	6.60381e+07	3.47382e+07	6.60381e+07
P56270	Myc-associated zinc finger protein	2.60407e+07	22459670	23814880	19467720	23814880
Q92878	DNA repair protein RAD50	8.57287e+06	7.21337e+06	5.82934e+06	2379500	5.82934e+06
none		99732570	1.43536e+08	1.1649e+08	83283010	1.1649e+08
P29401	Transketolase	1.70023e+06	2837220	4258100	2.91877e+06	4258100
Q92945	Far upstream element-binding protein 2	1.98798e+07	1.88369e+07	2.34581e+07	1.61408e+07	2.34581e+07
P52272	Heterogeneous nuclear ribonucleoprotein M	1.31481e+06	2.93972e+06	1384250	2573280	1384250
O00571;O15523	ATP-dependent RNA helicase DDX3X;ATP-dependent RNA helicase DDX3Y	7.12517e+06	7100090	6.34563e+06	4.6193e+06	6.34563e+06
Q96AY4	Tetratricopeptide repeat protein 28	2.38019e+06	1278940	1.10174e+06	722693	1.10174e+06
Q9P270	SLAIN motif-containing protein 2	31520010	2.27754e+07	2.74966e+07	2.49417e+07	2.74966e+07
P41250	Glycine--tRNA ligase	3411420	5.00454e+06	6.41545e+06	4.32361e+06	6.41545e+06
Q5SWX8	Protein odr-4 homolog	9328870	7.62469e+06	1.17502e+07	6659800	1.17502e+07
Q99729	Heterogeneous nuclear ribonucleoprotein A/B	25197180	2.26015e+07	28987280	25076640	28987280
P13010	X-ray repair cross-complementing protein 5	2.09047e+07	1.83921e+07	20986070	15210950	20986070
O43242	26S proteasome non-ATPase regulatory subunit 3	2.58748e+07	2.87438e+07	4.16856e+07	27381020	4.16856e+07
P42704	Leucine-rich PPR motif-containing protein, mitochondrial	1.48823e+07	1.35856e+07	2.09495e+07	1.32909e+07	2.09495e+07
Q16543	Hsp90 co-chaperone Cdc37;Hsp90 co-chaperone Cdc37, N-terminally processed	1.99493e+07	20452500	2.65393e+07	1.89209e+07	2.65393e+07
Q03393	6-pyruvoyl tetrahydrobiopterin synthase	4.58248e+07	5.74278e+07	8.27563e+07	6.07407e+07	8.27563e+07
P18669	Phosphoglycerate mutase 1	1.2734e+06	3.04297e+06	3624030	2254500	3624030
Q9BUF5	Tubulin beta-6 chain	5.01351e+06	6.80935e+06	5.0272e+06	1.56452e+06	5.0272e+06
P35637	RNA-binding protein FUS	3.41806e+07	40916800	4.59031e+07	3.05365e+07	4.59031e+07
Q14558	Phosphoribosyl pyrophosphate synthase-associated protein 1	8.37557e+07	7.42221e+07	7.21538e+07	7.16923e+07	7.21538e+07
Q15233	Non-POU domain-containing octamer-binding protein	7.55092e+07	7.29446e+07	8.36898e+07	6.52628e+07	8.36898e+07
P39019	40S ribosomal protein S19	1.81433e+07	1.17549e+07	1.46246e+07	35983940	1.46246e+07
Q8NBJ5	Procollagen galactosyltransferase 1	3.86693e+06	3515850	4972430	3.91564e+06	4972430
P62241	40S ribosomal protein S8	24382390	3.28732e+07	3.76283e+07	2.06044e+07	3.76283e+07
P67936	Tropomyosin alpha-4 chain	4.22458e+06	2586200	3.20932e+06	3.41716e+06	3.20932e+06
CON__Q86YZ3;Q86YZ3	Hornerin	6.24041e+06	726187	868703	56128140	868703
Q8N8S7	Protein enabled homolog	2.57507e+07	3.38559e+07	3.82645e+07	29505620	3.82645e+07
Q9BXP5	Serrate RNA effector molecule homolog	26529040	2.32379e+07	21897380	1.78605e+07	21897380
P14314	Glucosidase 2 subunit beta	2.96382e+07	2.6626e+07	3.25747e+07	18095100	3.25747e+07
O00303	Eukaryotic translation initiation factor 3 subunit F	27003690	43462400	50188390	3.48059e+07	50188390
P29692	Elongation factor 1-delta	3.71224e+08	3.57295e+08	4.20651e+08	2.98241e+08	4.20651e+08
P13639	Elongation factor 2	4.26429e+07	5.60801e+07	8.1289e+07	5.11893e+07	8.1289e+07
P60228	Eukaryotic translation initiation factor 3 subunit E	54960540	6.43003e+07	86716940	5.66247e+07	86716940
P40926	Malate dehydrogenase, mitochondrial	2755570	2.70891e+06	6.73787e+06	1.49383e+06	6.73787e+06
P09874	Poly [ADP-ribose] polymerase 1	1.9329e+07	12997020	1.64261e+07	13018530	1.64261e+07
P25788	Proteasome subunit alpha type-3	1.70242e+07	2.74058e+07	4.09631e+07	2.74356e+07	4.09631e+07
Q9Y2H1	Serine/threonine-protein kinase 38-like	3.48074e+08	2.66629e+08	3.04361e+08	2.60292e+08	3.04361e+08
Q8NC51	Plasminogen activator inhibitor 1 RNA-binding protein	37044720	4.50319e+07	4.35109e+07	3.65279e+07	4.35109e+07
P04075	Fructose-bisphosphate aldolase A	21586000	30935590	40254440	2.87412e+07	40254440
P12277	Creatine kinase B-type	15593300	1.72689e+07	2.47682e+07	2.04093e+07	2.47682e+07
P62979	Ubiquitin-40S ribosomal protein S27a;Ubiquitin;40S ribosomal protein S27a	2.53426e+07	32879310	3.0968e+07	2.54397e+07	3.0968e+07
Q16531	DNA damage-binding protein 1	50317660	5.42483e+07	61151430	4.64962e+07	61151430
Q08945	FACT complex subunit SSRP1	15359920	1.61703e+07	15852740	1.45278e+07	15852740
Q8NCE2	Myotubularin-related protein 14	106064900	7.98649e+07	6.29259e+07	8.3033e+07	6.29259e+07
Q9P2R3	Rabankyrin-5	2.30915e+08	2.29367e+08	276728650	1.92472e+08	276728650
P32119	Peroxiredoxin-2	13473590	18845900	2.51313e+07	14569640	2.51313e+07
P60891	Ribose-phosphate pyrophosphokinase 1	167166940	158002370	1.54467e+08	2.01045e+08	1.54467e+08
Q9NYF8	Bcl-2-associated transcription factor 1	4.40414e+07	4.45548e+07	7.28181e+07	4.60389e+07	7.28181e+07
Q9BUA3	Uncharacterized protein C11orf84	2.44065e+08	221878530	2.24932e+08	2.23045e+08	2.24932e+08
Q14152	Eukaryotic translation initiation factor 3 subunit A	341768920	337737940	3.96673e+08	2.56954e+08	3.96673e+08
P10809	60 kDa heat shock protein, mitochondrial	421183720	4.13016e+08	435685120	3.38734e+08	435685120
Q13263	Transcription intermediary factor 1-beta	1.37038e+08	1.24878e+08	1.55192e+08	1.16465e+08	1.55192e+08
P06576	ATP synthase subunit beta, mitochondrial	79238230	1.05127e+08	1.33577e+08	6.50461e+07	1.33577e+08
Q15208	Serine/threonine-protein kinase 38	1.10897e+09	9.03222e+08	1.00852e+09	1.05234e+09	1.00852e+09
Q9UHD8	Septin-9	1.84844e+07	23150260	2.65942e+07	2.01718e+07	2.65942e+07
P60174	Triosephosphate isomerase	1.94653e+06	4327140	6002090	5.78657e+06	6002090
O43707;P12814	Alpha-actinin-4;Alpha-actinin-1	3909328	9367255	1.04593e+07	8523940	1.04593e+07
P43686	26S protease regulatory subunit 6B	51190550	65445370	8.57407e+07	6.382e+07	8.57407e+07
Q13098	COP9 signalosome complex subunit 1	6244010	6.17951e+06	7.30724e+06	4.96791e+06	7.30724e+06
P35606	Coatomer subunit beta	1.81821e+07	2.05223e+07	23219640	15568850	23219640
O60568	Procollagen-lysine,2-oxoglutarate 5-dioxygenase 3	2.3353e+06	2054140	3050350	2.67137e+06	3050350
O75369;P21333;Q14315	Filamin-B;Filamin-A;Filamin-C	1.66311e+07	2.72921e+07	3.70088e+07	2.17301e+07	3.70088e+07
P0DMV9;P0DMV8;P11142;P54652;P34931	Heat shock 70 kDa protein 1B;Heat shock 70 kDa protein 1A;Heat shock cognate 71 kDa protein;Heat shock-related 70 kDa protein 2;Heat shock 70 kDa protein 1-like	9.17973e+06	2.32538e+07	2.12982e+07	24440320	2.12982e+07
P11177	Pyruvate dehydrogenase E1 component subunit beta, mitochondrial	0	1298400	1129760	1.22033e+06	1129760
P54886	Delta-1-pyrroline-5-carboxylate synthase;Glutamate 5-kinase;Gamma-glutamyl phosphate reductase	2.19746e+06	2125050	3120520	1172170	3120520
Q12904	Aminoacyl tRNA synthase complex-interacting multifunctional protein 1;Endothelial monocyte-activating polypeptide 2	688483	1.7376e+06	2.019e+06	995293	2.019e+06
Q9Y383;Q9NQ29	Putative RNA-binding protein Luc7-like 2;Putative RNA-binding protein Luc7-like 1	3.19313e+06	3007830	3.37905e+06	2.22994e+06	3.37905e+06
Q9Y678	Coatomer subunit gamma-1	1.69808e+07	19736500	1.996e+07	13858740	1.996e+07
Q9Y3I0	tRNA-splicing ligase RtcB homolog	3.44261e+06	5.52789e+06	5315880	4.23149e+06	5315880
P09543	2,3-cyclic-nucleotide 3-phosphodiesterase	3.0034e+06	2355010	2441850	3.05035e+06	2441850
Q05519	Serine/arginine-rich splicing factor 11	1.01523e+06	1.31964e+06	1.49444e+06	1.10557e+06	1.49444e+06
Q15366	Poly(rC)-binding protein 2	2491400	2.71882e+06	4.28132e+06	1.91017e+06	4.28132e+06
O95785	Protein Wiz	0	1011600	1160960	0	1160960
P31946;P27348;P63104	14-3-3 protein beta/alpha;14-3-3 protein beta/alpha, N-terminally processed;14-3-3 protein theta;14-3-3 protein zeta/delta	0	419323	739563	0	739563
P67775;P62714;P60510	Serine/threonine-protein phosphatase 2A catalytic subunit alpha isoform;Serine/threonine-protein phosphatase 2A catalytic subunit beta isoform;Serine/threonine-protein phosphatase 4 catalytic subunit	0	1.09637e+06	847100	669300	847100
Q00978	Interferon regulatory factor 9	0	1.91003e+06	2755600	2.60853e+06	2755600
Q08379	Golgin subfamily A member 2	0	222957	344950	155877	344950
Q9Y5M8	Signal recognition particle receptor subunit beta	0	1.23177e+06	717090	1.31488e+06	717090
O15397	Importin-8	5.82353e+06	7.83117e+06	1.31332e+07	7624900	1.31332e+07
P55209;Q99733	Nucleosome assembly protein 1-like 1;Nucleosome assembly protein 1-like 4	7.54203e+06	8504000	10102000	7952030	10102000
Q15181	Inorganic pyrophosphatase	5.48137e+06	7.13919e+06	1.08227e+07	5373550	1.08227e+07
Q6Y7W6	PERQ amino acid-rich with GYF domain-containing protein 2	3.90918e+06	3.39819e+06	4350520	3.10723e+06	4350520
Q9BQE3	Tubulin alpha-1C chain	6.18229e+06	1.27181e+07	1.93285e+07	9.3921e+06	1.93285e+07
Q99417	C-Myc-binding protein	5.28681e+07	45460220	6.39075e+07	3.24421e+07	6.39075e+07
Q9Y265	RuvB-like 1	24712410	3.2169e+07	4.02957e+07	2.80261e+07	4.02957e+07
P30876	DNA-directed RNA polymerase II subunit RPB2	5.95059e+06	4.48876e+06	5.36223e+06	5112560	5.36223e+06
P61201	COP9 signalosome complex subunit 2	5.25116e+06	4.57838e+06	7.14623e+06	3.69325e+06	7.14623e+06
Q58FF8	Putative heat shock protein HSP 90-beta 2	6.11322e+06	7031400	9.85773e+06	6.09071e+06	9.85773e+06
Q8N163	Cell cycle and apoptosis regulator protein 2	7.07727e+06	8.07005e+06	9.30949e+06	6177340	9.30949e+06
Q15654	Thyroid receptor-interacting protein 6	764367	764427	771203	1.6636e+06	771203
O75629	Protein CREG1	0	6.24333e+06	586200	0	586200
P04259;CON__P02538;P02538;CON__O95678;O95678;CON__P48668;P48668;CON__P04259	Keratin, type II cytoskeletal 6B;Keratin, type II cytoskeletal 6A;Keratin, type II cytoskeletal 75;Keratin, type II cytoskeletal 6C	0	3237600	218837	29922.3	218837
P22392;O60361	Nucleoside diphosphate kinase B;Putative nucleoside diphosphate kinase	160240	659047	802233	454810	802233
P55786;A6NEC2	Puromycin-sensitive aminopeptidase;Puromycin-sensitive aminopeptidase-like protein	0	291690	648767	322887	648767
Q13573	SNW domain-containing protein 1	0	373800	368067	1.15993e+06	368067
Q15691	Microtubule-associated protein RP/EB family member 1	675833	516210	699883	1191100	699883
Q8IYF3	Testis-expressed sequence 11 protein	0	1.60987e+06	104217	138183	104217
Q99880;Q99879;Q99877;Q93079;Q8N257;Q5QNW6;Q16778;P62807;P58876;P33778;P23527;P57053;P06899;O60814	Histone H2B type 1-L;Histone H2B type 1-M;Histone H2B type 1-N;Histone H2B type 1-H;Histone H2B type 3-B;Histone H2B type 2-F;Histone H2B type 2-E;Histone H2B type 1-C/E/F/G/I;Histone H2B type 1-D;Histone H2B type 1-B;Histone H2B type 1-O;Histone H2B type F-S;Histone H2B type 1-J;Histone H2B type 1-K	0	1.51993e+06	318377	0	318377
O00410	Importin-5	1002820	1.02257e+06	1.66521e+06	933427	1.66521e+06
P05141;Q9H0C2;P12236;P12235	ADP/ATP translocase 2;ADP/ATP translocase 2, N-terminally processed;ADP/ATP translocase 4;ADP/ATP translocase 4, N-terminally processed;ADP/ATP translocase 3;ADP/ATP translocase 3, N-terminally processed;ADP/ATP translocase 1	6.12057e+06	8.94514e+06	1.17085e+07	6.43027e+06	1.17085e+07
P36542	ATP synthase subunit gamma, mitochondrial	2421430	2.98926e+06	3.22173e+06	2.18879e+06	3.22173e+06
Q96BD8	Spindle and kinetochore-associated protein 1	3.91941e+06	3.43062e+06	4.60405e+06	4.81961e+06	4.60405e+06
Q9HC35	Echinoderm microtubule-associated protein-like 4	4.49355e+06	3.4519e+06	5.44114e+06	1.58373e+06	5.44114e+06
O14920	Inhibitor of nuclear factor kappa-B kinase subunit beta	9328000	7387000	8.46227e+06	15102000	8.46227e+06
O94991	SLIT and NTRK-like protein 5	1.83997e+06	2732520	2.62263e+06	2.47653e+06	2.62263e+06
O95239	Chromosome-associated kinesin KIF4A	811373	498220	561837	524753	561837
P00367;P49448	Glutamate dehydrogenase 1, mitochondrial;Glutamate dehydrogenase 2, mitochondrial	888537	1002900	984933	447240	984933
P06753;CON__Q3SX28;P07951	Tropomyosin alpha-3 chain;Tropomyosin beta chain	220043	422593	315907	192370	315907
P07910	Heterogeneous nuclear ribonucleoproteins C1/C2	198977	998667	369633	0	369633
P08238;P07900;Q14568;Q58FF8	Heat shock protein HSP 90-beta;Heat shock protein HSP 90-alpha;Heat shock protein HSP 90-alpha A2;Putative heat shock protein HSP 90-beta 2	4.34624e+07	2.85714e+07	54203100	2.91168e+07	54203100
P12236	ADP/ATP translocase 3;ADP/ATP translocase 3, N-terminally processed	607903	1.80087e+06	406340	0	406340
P23528	Cofilin-1	3.96553e+07	43556500	67330300	44848920	67330300
P31943;P52597	Heterogeneous nuclear ribonucleoprotein H;Heterogeneous nuclear ribonucleoprotein H, N-terminally processed;Heterogeneous nuclear ribonucleoprotein F;Heterogeneous nuclear ribonucleoprotein F, N-terminally processed	7438470	6604000	4873600	5878530	4873600
P31946	14-3-3 protein beta/alpha;14-3-3 protein beta/alpha, N-terminally processed	6172690	8.76231e+06	10195090	7.36718e+06	10195090
P42167	Lamina-associated polypeptide 2, isoforms beta/gamma;Thymopoietin;Thymopentin	309623	219330	295090	537133	295090
P50502;Q8NFI4;Q8IZP2	Hsc70-interacting protein;Putative protein FAM10A5;Putative protein FAM10A4	592497	619150	730450	814867	730450
P51858	Hepatoma-derived growth factor	1.07603e+06	763567	1145750	989667	1145750
P62753	40S ribosomal protein S6	2.29114e+07	20950780	2.94588e+07	1.89786e+07	2.94588e+07
P78347;Q86UP8;Q6EKJ0	General transcription factor II-I;General transcription factor II-I repeat domain-containing protein 2A;General transcription factor II-I repeat domain-containing protein 2B	786950	478437	456210	593653	456210
Q14141	Septin-6	5824280	4.96112e+06	5.74984e+06	2.18872e+06	5.74984e+06
Q14444	Caprin-1	3.71492e+06	3042790	3.95197e+06	3.42497e+06	3.95197e+06
Q15057	Arf-GAP with coiled-coil, ANK repeat and PH domain-containing protein 2	5.1958e+07	3.73407e+07	4.31297e+07	40691090	4.31297e+07
Q16629	Serine/arginine-rich splicing factor 7	2.21697e+06	1.39063e+06	2864300	975800	2864300
Q2TAY7	WD40 repeat-containing protein SMU1;WD40 repeat-containing protein SMU1, N-terminally processed	3808710	2598960	3.37662e+06	3.44632e+06	3.37662e+06
Q4G0J3	La-related protein 7	2.79992e+06	2.94959e+06	2.22274e+06	1.36607e+06	2.22274e+06
Q562R1	Beta-actin-like protein 2	6.44357e+06	343390	2.30543e+07	2.14567e+07	2.30543e+07
Q6P1J9	Parafibromin	4.36737e+06	3.2981e+06	4199260	3340530	4199260
Q7L014	Probable ATP-dependent RNA helicase DDX46	5308500	3.79956e+06	4166100	4215830	4166100
Q8IX18	Probable ATP-dependent RNA helicase DHX40	1384000	300673	556437	207553	556437
Q8WWM7	Ataxin-2-like protein	811300	948087	712010	193347	712010
Q92499	ATP-dependent RNA helicase DDX1	376513	686413	1.16298e+06	575080	1.16298e+06
Q96FW1	Ubiquitin thioesterase OTUB1	931363	1568400	1871100	485880	1871100
Q9BPX3	Condensin complex subunit 3	250100	272763	325023	0	325023
Q9HCK8	Chromodomain-helicase-DNA-binding protein 8	448067	222463	284127	0	284127
Q9NSB8	Homer protein homolog 2	1.64117e+06	1311230	1.76299e+06	1.4445e+06	1.76299e+06
Q9NYL9	Tropomodulin-3	3.56826e+06	2.1942e+06	3.02261e+06	3.31887e+06	3.02261e+06
Q9UBF2	Coatomer subunit gamma-2	189733	462967	271973	0	271973
O14818	Proteasome subunit alpha type-7	16795800	2.43315e+07	2.60807e+07	2.0751e+07	2.60807e+07
P52597	Heterogeneous nuclear ribonucleoprotein F;Heterogeneous nuclear ribonucleoprotein F, N-terminally processed	6061830	5.69703e+06	7522140	4.2963e+06	7522140
Q9UHB9	Signal recognition particle subunit SRP68	7459870	6.38852e+06	7400820	6.78011e+06	7400820
Q9UMS4	Pre-mRNA-processing factor 19	4.55887e+06	3.70671e+06	4.64496e+06	3.60339e+06	4.64496e+06
Q49A26	Putative oxidoreductase GLYR1	3.86653e+06	1.63628e+06	2.34611e+06	1.42112e+06	2.34611e+06
Q5H9R7	Serine/threonine-protein phosphatase 6 regulatory subunit 3	1278140	538003	792937	786983	792937
Q8IXB1	DnaJ homolog subfamily C member 10	4.87967e+06	2.90454e+06	4.5083e+06	2.82602e+06	4.5083e+06
P15170	Eukaryotic peptide chain release factor GTP-binding subunit ERF3A	968233	909767	821567	241983	821567
Q13885;Q9BVA1;Q9BUF5	Tubulin beta-2A chain;Tubulin beta-2B chain;Tubulin beta-6 chain	1.12151e+06	380367	493200	0	493200
Q5TAQ9	DDB1- and CUL4-associated factor 8	351750	272653	824733	672127	824733
Q9H857	5-nucleotidase domain-containing protein 2	973693	378767	671733	1.15473e+06	671733
Q9Y490;Q9Y4G6	Talin-1;Talin-2	986133	220970	189397	0	189397
O43617	Trafficking protein particle complex subunit 3	813267	751713	935633	598307	935633
O94915	Protein furry homolog-like	815270	1.09178e+06	1.79871e+06	8.09207e+06	1.79871e+06
P05386	60S acidic ribosomal protein P1	2.40687e+06	3.42137e+06	2.26777e+06	2.8384e+06	2.26777e+06
P08670;P04259;CON__P02538;P02538;CON__O95678;O95678;CON__P07744;CON__Q8VED5;CON__P48668;P48668;CON__P13647;P13647;CON__Q5XKE5;Q5XKE5;CON__P04259;CON__P05787;P05787;CON__H-INV:HIT000292931;CON__Q8N1N4-2;CON__Q7RTT2;Q8N1N4	Vimentin;Keratin, type II cytoskeletal 6B;Keratin, type II cytoskeletal 6A;Keratin, type II cytoskeletal 75;Keratin, type II cytoskeletal 6C;Keratin, type II cytoskeletal 5;Keratin, type II cytoskeletal 79;Keratin, type II cytoskeletal 8;Keratin, type II cytoskeletal 78	7.36953e+06	1.22475e+07	4304500	4765100	4304500
P32322;Q96C36	Pyrroline-5-carboxylate reductase 1, mitochondrial;Pyrroline-5-carboxylate reductase 2	1.40964e+06	476177	734277	1.81384e+06	734277
Q9NRN7	L-aminoadipate-semialdehyde dehydrogenase-phosphopantetheinyl transferase	423997	220190	377167	158417	377167
O14530	Thioredoxin domain-containing protein 9	3.10738e+06	3393300	3.56711e+06	2.69842e+06	3.56711e+06
P37198	Nuclear pore glycoprotein p62	3004770	1.90845e+06	3.09437e+06	900100	3.09437e+06
P60709	Actin, cytoplasmic 1;Actin, cytoplasmic 1, N-terminally processed	2.00512e+07	17254500	2.01006e+07	13895500	2.01006e+07
P60842	Eukaryotic initiation factor 4A-I	9.53692e+06	1.09486e+07	10917400	8.53985e+06	10917400
Q15637	Splicing factor 1	2.7542e+06	2.60217e+06	3640600	491267	3640600
Q92769	Histone deacetylase 2	4.82257e+06	3.8181e+06	5.33555e+06	2.71493e+06	5.33555e+06
P08865	40S ribosomal protein SA	7492600	10027910	1.05177e+07	12433900	1.05177e+07
Q14257	Reticulocalbin-2	2.58168e+07	1.91281e+07	2.64789e+07	1.94242e+07	2.64789e+07
Q01518	Adenylyl cyclase-associated protein 1	2.05465e+07	1.72394e+07	1.98074e+07	1.42875e+07	1.98074e+07
O43852	Calumenin	13225060	7.58217e+06	8.57163e+06	7.55951e+06	8.57163e+06
Q6PKG0	La-related protein 1	4282470	2.71031e+06	3.91579e+06	1578490	3.91579e+06
P49588	Alanine--tRNA ligase, cytoplasmic	761767	419403	342380	380360	342380
Q01433	AMP deaminase 2	2.14243e+06	826633	807777	1048000	807777
Q3YEC7	Rab-like protein 6	2754200	1152900	849197	952317	849197
Q13247	Serine/arginine-rich splicing factor 6	3.06234e+06	1757560	1.69719e+06	3058200	1.69719e+06
Q8N684	Cleavage and polyadenylation specificity factor subunit 7	2662970	1.38098e+06	1.50338e+06	1.50257e+06	1.50338e+06
Q96D71	RalBP1-associated Eps domain-containing protein 1	369342	110070	22006.3	836067	22006.3
Q9BT25	HAUS augmin-like complex subunit 8	1046790	441133	694667	926000	694667
Q9BTA9	WW domain-containing adapter protein with coiled-coil	1.63346e+06	560200	128927	2.28933e+06	128927
Q9BY41	Histone deacetylase 8	5.68395e+06	4044770	10611400	3.67077e+06	10611400
Q9P2J5	Leucine--tRNA ligase, cytoplasmic	2.72816e+06	2592400	3.27347e+06	1.67286e+06	3.27347e+06
Q9Y5L4	Mitochondrial import inner membrane translocase subunit Tim13	1.22066e+06	256440	310417	114677	310417
P08238;Q58FF7	Heat shock protein HSP 90-beta;Putative heat shock protein HSP 90-beta-3	62282030	50272830	57770500	4.95525e+07	57770500
Q99613	Eukaryotic translation initiation factor 3 subunit C	1.15839e+07	5454030	7.81806e+06	7.5219e+06	7.81806e+06
O15294	UDP-N-acetylglucosamine--peptide N-acetylglucosaminyltransferase 110 kDa subunit	2004020	371400	330760	243473	330760
P17844	Probable ATP-dependent RNA helicase DDX5	2098600	638263	567100	991720	567100
P46940	Ras GTPase-activating-like protein IQGAP1	2.80522e+06	743803	764660	501067	764660
P63104	14-3-3 protein zeta/delta	3.7946e+07	43236950	5.06488e+07	34359090	5.06488e+07
Q15020	Squamous cell carcinoma antigen recognized by T-cells 3	1.05414e+07	8.21489e+06	6919440	6159010	6919440
Q9BWJ5	Splicing factor 3B subunit 5	2.11685e+07	1.79025e+07	1.83855e+07	1.12277e+07	1.83855e+07
P11171	Protein 4.1	2.18793e+06	789700	795167	0	795167
O60825	6-phosphofructo-2-kinase/fructose-2,6-bisphosphatase 2;6-phosphofructo-2-kinase;Fructose-2,6-bisphosphatase	3.56465e+07	23574940	2.14847e+07	2.20395e+07	2.14847e+07
Q9UJW0	Dynactin subunit 4	5849940	2.58592e+06	3.86341e+06	2.74169e+06	3.86341e+06
P23588	Eukaryotic translation initiation factor 4B	4.2573e+09	3.35049e+09	4.75879e+09	3.18666e+09	4.75879e+09
O60749;Q13596	Sorting nexin-2;Sorting nexin-1	0	9.66087e+07	139288000	1.19973e+08	139288000
P04085	Platelet-derived growth factor subunit A	383817	1.78266e+06	2.38932e+06	1.60386e+06	2.38932e+06
P63261	Actin, cytoplasmic 2;Actin, cytoplasmic 2, N-terminally processed	2.79287e+07	2.69787e+07	2.85891e+07	21176440	2.85891e+07
Q9NR30	Nucleolar RNA helicase 2	0	4.45223e+06	5363700	4.17603e+06	5363700
Q9Y230	RuvB-like 2	3.01368e+07	34696570	4.19763e+07	3.31085e+07	4.19763e+07
Q9Y262	Eukaryotic translation initiation factor 3 subunit L	4.90738e+07	6.29472e+07	7.45783e+07	50674300	7.45783e+07
O14579	Coatomer subunit epsilon	13204570	1.90813e+07	2.02138e+07	1.17849e+07	2.02138e+07
P05387	60S acidic ribosomal protein P2	3.2033e+06	3.60153e+06	2.36498e+06	4.76112e+06	2.36498e+06
P35080	Profilin-2	1429540	2.92653e+06	5248850	2.84841e+06	5248850
P42677;Q71UM5	40S ribosomal protein S27;40S ribosomal protein S27-like	18377700	2.02764e+07	31450400	19215200	31450400
P67809;P16989;Q9Y2T7	Nuclease-sensitive element-binding protein 1;Y-box-binding protein 3;Y-box-binding protein 2	187123	826943	959173	642500	959173
Q13162	Peroxiredoxin-4	7.19603e+06	6.40013e+06	7790600	4.05427e+06	7790600
Q16659	Mitogen-activated protein kinase 6	1.90519e+06	2770220	2.19696e+06	1.06092e+06	2.19696e+06
Q6PK81	Zinc finger protein 773	135157	2.20327e+07	2.61467e+07	25247000	2.61467e+07
Q92598;O95757	Heat shock protein 105 kDa;Heat shock 70 kDa protein 4L	1.89516e+06	2793390	3.28523e+06	2.27715e+06	3.28523e+06
Q96EA4	Protein Spindly	500133	735090	905770	401653	905770
Q96S59	Ran-binding protein 9	345633	1.06788e+06	1451470	907307	1451470
Q99627	COP9 signalosome complex subunit 8	584100	1197920	1.42607e+06	1.03041e+06	1.42607e+06
Q9Y608	Leucine-rich repeat flightless-interacting protein 2	2099800	2.44607e+06	3.25274e+06	1.85937e+06	3.25274e+06
P11142;P54652;P17066	Heat shock cognate 71 kDa protein;Heat shock-related 70 kDa protein 2;Heat shock 70 kDa protein 6	1.60564e+07	25605600	33716800	2.70656e+07	33716800
P60709;Q6S8J3;P63261	Actin, cytoplasmic 1;Actin, cytoplasmic 1, N-terminally processed;POTE ankyrin domain family member E;Actin, cytoplasmic 2;Actin, cytoplasmic 2, N-terminally processed	4.85053e+06	8231400	7.41183e+06	6899420	7.41183e+06
P61163	Alpha-centractin	7.88326e+06	12705000	1.50388e+07	1.00732e+07	1.50388e+07
Q00325	Phosphate carrier protein, mitochondrial	3.5819e+06	6019700	8.90383e+06	5.32895e+06	8.90383e+06
Q14558;O60256	Phosphoribosyl pyrophosphate synthase-associated protein 1;Phosphoribosyl pyrophosphate synthase-associated protein 2	33215140	22702000	2.62413e+07	2.56137e+07	2.62413e+07
P49736	DNA replication licensing factor MCM2	26388250	25755850	34954510	2.71392e+07	34954510
P61927	60S ribosomal protein L37	7.49708e+06	7025820	9472670	6.16477e+06	9472670
P68363;P68366;A6NHL2;Q9BQE3;Q71U36	Tubulin alpha-1B chain;Tubulin alpha-4A chain;Tubulin alpha chain-like 3;Tubulin alpha-1C chain;Tubulin alpha-1A chain	3.8706e+07	5.81765e+07	99359700	5.84151e+07	99359700
P68363;P68366;Q9BQE3;Q71U36	Tubulin alpha-1B chain;Tubulin alpha-4A chain;Tubulin alpha-1C chain;Tubulin alpha-1A chain	1.3809e+07	2.21582e+07	3.7018e+07	2.15436e+07	3.7018e+07
O00743	Serine/threonine-protein phosphatase 6 catalytic subunit;Serine/threonine-protein phosphatase 6 catalytic subunit, N-terminally processed	1.06521e+06	3.24193e+06	3355800	2114800	3355800
O15541	RING finger protein 113A	1.30603e+06	1.49157e+06	1.34233e+06	826213	1.34233e+06
O75369;Q14315	Filamin-B;Filamin-C	994527	1.88783e+06	1.87573e+06	1650040	1.87573e+06
P0DMV9;P0DMV8;P11142;P54652;P17066;P34931	Heat shock 70 kDa protein 1B;Heat shock 70 kDa protein 1A;Heat shock cognate 71 kDa protein;Heat shock-related 70 kDa protein 2;Heat shock 70 kDa protein 6;Heat shock 70 kDa protein 1-like	7154100	10559800	10869600	1.03155e+07	10869600
P10412;P16402;Q02539;P22492;P16401;P16403	Histone H1.4;Histone H1.3;Histone H1.1;Histone H1t;Histone H1.5;Histone H1.2	3.97218e+06	4.58557e+06	5.37253e+06	2.13997e+06	5.37253e+06
P18669;P15259	Phosphoglycerate mutase 1;Phosphoglycerate mutase 2	901467	1.65466e+06	1.67364e+06	1443500	1.67364e+06
P23458;O60674	Tyrosine-protein kinase JAK1;Tyrosine-protein kinase JAK2	3.08903e+06	2899200	4.07077e+06	2.58637e+06	4.07077e+06
P29692;P24534	Elongation factor 1-delta;Elongation factor 1-beta	1.75602e+07	18842700	2.08806e+07	5500700	2.08806e+07
P35527	Keratin, type I cytoskeletal 9	8484100	2.75203e+06	2820310	2.62812e+07	2820310
P39687	Acidic leucine-rich nuclear phosphoprotein 32 family member A	1.37084e+06	2.2859e+06	3.27223e+06	1.83837e+06	3.27223e+06
P42167;P42166	Lamina-associated polypeptide 2, isoforms beta/gamma;Thymopoietin;Thymopentin;Lamina-associated polypeptide 2, isoform alpha;Thymopoietin;Thymopentin	704800	892390	1597650	646643	1597650
P42677	40S ribosomal protein S27	2377600	2.80823e+06	4.41757e+06	2.98117e+06	4.41757e+06
P55036;A2A3N6	26S proteasome non-ATPase regulatory subunit 4;Putative PIP5K1A and PSMD4-like protein	872687	1.12527e+06	1.43038e+06	473000	1.43038e+06
P60468	Protein transport protein Sec61 subunit beta	1.24577e+06	1.2082e+06	2.17473e+06	922500	2.17473e+06
P61964	WD repeat-containing protein 5	746903	910797	1.21168e+06	792733	1.21168e+06
P62195;Q8NB90	26S protease regulatory subunit 8;Spermatogenesis-associated protein 5	2.30307e+06	3.10593e+06	5.79793e+06	2.88327e+06	5.79793e+06
P68133;P68032;P63267;P62736;P60709;Q6S8J3;A5A3E0;P0CG38;P0CG39;P63261	Actin, alpha skeletal muscle;Actin, alpha cardiac muscle 1;Actin, gamma-enteric smooth muscle;Actin, aortic smooth muscle;Actin, cytoplasmic 1;Actin, cytoplasmic 1, N-terminally processed;POTE ankyrin domain family member E;POTE ankyrin domain family member F;POTE ankyrin domain family member I;POTE ankyrin domain family member J;Actin, cytoplasmic 2;Actin, cytoplasmic 2, N-terminally processed	3.84123e+07	3.85723e+07	5.33483e+07	26754000	5.33483e+07
Q13885	Tubulin beta-2A chain	2492900	5040400	5601000	2.92803e+06	5601000
Q15366;P57721	Poly(rC)-binding protein 2;Poly(rC)-binding protein 3	1.47252e+06	1.46277e+06	2022330	1.17973e+06	2022330
Q9NQX3	Gephyrin;Molybdopterin adenylyltransferase;Molybdopterin molybdenumtransferase	1.22553e+06	1.84747e+06	2.02718e+06	776800	2.02718e+06
CON__Q04695;Q04695;CON__Q99PS0;CON__Q9C075;Q9C075	Keratin, type I cytoskeletal 17;Keratin, type I cytoskeletal 23	0	1.79177e+06	3.94067e+06	0	3.94067e+06
O15269	Serine palmitoyltransferase 1	436267	546950	539593	314587	539593
O75607	Nucleoplasmin-3	0	693167	429233	0	429233
P12236;P12235	ADP/ATP translocase 3;ADP/ATP translocase 3, N-terminally processed;ADP/ATP translocase 1	583667	866633	721290	478967	721290
P16615;Q93084	Sarcoplasmic/endoplasmic reticulum calcium ATPase 2;Sarcoplasmic/endoplasmic reticulum calcium ATPase 3	603367	749367	810240	0	810240
P17612	cAMP-dependent protein kinase catalytic subunit alpha	1057200	844267	968327	393800	968327
P50502;Q8IZP2	Hsc70-interacting protein;Putative protein FAM10A4	617700	577370	637757	0	637757
Q9NX55	Huntingtin-interacting protein K	0	479867	583133	0	583133
O60563	Cyclin-T1	2935710	2222900	2.58875e+06	1930230	2.58875e+06
P0DMV9;P0DMV8;P11142;P54652;P17066;P48741;P34931	Heat shock 70 kDa protein 1B;Heat shock 70 kDa protein 1A;Heat shock cognate 71 kDa protein;Heat shock-related 70 kDa protein 2;Heat shock 70 kDa protein 6;Putative heat shock 70 kDa protein 7;Heat shock 70 kDa protein 1-like	4.86415e+07	50950400	7.2829e+07	51304900	7.2829e+07
P10412	Histone H1.4	6026300	6845400	7.05047e+06	5.97394e+06	7.05047e+06
P57081	tRNA (guanine-N(7)-)-methyltransferase non-catalytic subunit WDR4	1.06055e+07	8.35403e+06	28886900	1.25812e+07	28886900
P62937;F5H284	Peptidyl-prolyl cis-trans isomerase A;Peptidyl-prolyl cis-trans isomerase A, N-terminally processed;Peptidyl-prolyl cis-trans isomerase A-like 4D	7.8365e+06	1.21382e+07	1.38521e+07	1.19629e+07	1.38521e+07
P80297;P02795;P13640;CON__P67983;Q8N339;P04732	Metallothionein-1X;Metallothionein-2;Metallothionein-1G;Metallothionein-1M;Metallothionein-1E	1.75851e+06	1544380	2.62069e+06	1539780	2.62069e+06
Q9Y3D9	28S ribosomal protein S23, mitochondrial	4238300	5.65357e+06	5473500	5.06823e+06	5473500
Q06830;Q13162	Peroxiredoxin-1;Peroxiredoxin-4	5.67467e+07	9.10502e+07	1.10343e+08	8.09615e+07	1.10343e+08
CON__P02666		0	0	0	3.03103e+06	0
CON__P02668		0	0	0	1.02432e+07	0
CON__P02754		0	0	0	7.24887e+06	0
CON__P05787;P05787	Keratin, type II cytoskeletal 8	0	0	0	193723	0
CON__P05787;P05787;CON__H-INV:HIT000292931	Keratin, type II cytoskeletal 8	0	0	0	0	0
CON__P05787;P05787;CON__H-INV:HIT000292931;CON__REFSEQ:XP_092267;CON__Q9H552	Keratin, type II cytoskeletal 8	0	0	0	0	0
O00311	Cell division cycle 7-related protein kinase	0	0	0	0	0
O00629	Importin subunit alpha-3	1.34971e+06	1.27437e+06	1.57347e+06	961600	1.57347e+06
O14734	Acyl-coenzyme A thioesterase 8	0	0	0	0	0
O15084	Serine/threonine-protein phosphatase 6 regulatory ankyrin repeat subunit A	0	0	0	0	0
O15235	28S ribosomal protein S12, mitochondrial	0	0	0	183153	0
O43324	Eukaryotic translation elongation factor 1 epsilon-1	1756370	2.04966e+06	2195200	1485880	2195200
O43395	U4/U6 small nuclear ribonucleoprotein Prp3	2.74087e+06	461133	1.06613e+06	563300	1.06613e+06
O43583	Density-regulated protein	655900	508200	553500	0	553500
O43593	Lysine-specific demethylase hairless	0	0	0	0	0
O43765	Small glutamine-rich tetratricopeptide repeat-containing protein alpha	0	0	0	0	0
O43819	Protein SCO2 homolog, mitochondrial	0	0	0	0	0
O75419	Cell division control protein 45 homolog	0	0	0	0	0
O75880	Protein SCO1 homolog, mitochondrial	986043	1.12853e+06	1.02523e+06	982733	1.02523e+06
P04350;P68371;A6NNZ2;P07437;Q13885;Q9BVA1;Q9BUF5;Q3ZCM7	Tubulin beta-4A chain;Tubulin beta-4B chain;Tubulin beta-8 chain-like protein LOC260334;Tubulin beta chain;Tubulin beta-2A chain;Tubulin beta-2B chain;Tubulin beta-6 chain;Tubulin beta-8 chain	5.27317e+07	6.38637e+07	1.02249e+08	63657020	1.02249e+08
P04350;P68371;P07437;Q9BVA1;Q9BUF5	Tubulin beta-4A chain;Tubulin beta-4B chain;Tubulin beta chain;Tubulin beta-2B chain;Tubulin beta-6 chain	0	0	0	2.44753e+06	0
P04350;P68371;Q3ZCM7	Tubulin beta-4A chain;Tubulin beta-4B chain;Tubulin beta-8 chain	3.01886e+07	28415700	39381800	28867800	39381800
P05023;P13637;P50993;Q13733	Sodium/potassium-transporting ATPase subunit alpha-1;Sodium/potassium-transporting ATPase subunit alpha-3;Sodium/potassium-transporting ATPase subunit alpha-2;Sodium/potassium-transporting ATPase subunit alpha-4	4114040	3.97317e+06	5.66667e+06	3238300	5.66667e+06
P05976;P08590	Myosin light chain 1/3, skeletal muscle isoform;Myosin light chain 3	2.94463e+06	1847300	2481700	2.52177e+06	2481700
P06493;P24941;Q00526	Cyclin-dependent kinase 1;Cyclin-dependent kinase 2;Cyclin-dependent kinase 3	716190	517993	790163	232450	790163
P06733;P13929	Alpha-enolase;Beta-enolase	0	0	0	0	0
P07900;Q14568;Q58FG0	Heat shock protein HSP 90-alpha;Heat shock protein HSP 90-alpha A2;Putative heat shock protein HSP 90-alpha A5	8.00167e+06	5523900	7.97297e+06	4.94707e+06	7.97297e+06
P07910;P0DMR1;O60812;B7ZW38;B2RXH8	Heterogeneous nuclear ribonucleoproteins C1/C2;Heterogeneous nuclear ribonucleoprotein C-like 4;Heterogeneous nuclear ribonucleoprotein C-like 1;Heterogeneous nuclear ribonucleoprotein C-like 3;Heterogeneous nuclear ribonucleoprotein C-like 2	0	0	0	0	0
P08238;P14625	Heat shock protein HSP 90-beta;Endoplasmin	1.0014e+07	6.31856e+06	1.18316e+07	5.54442e+06	1.18316e+07
P08238;Q58FF7;P07900;Q58FF8	Heat shock protein HSP 90-beta;Putative heat shock protein HSP 90-beta-3;Heat shock protein HSP 90-alpha;Putative heat shock protein HSP 90-beta 2	0	0	0	0	0
P08238;Q58FF8	Heat shock protein HSP 90-beta;Putative heat shock protein HSP 90-beta 2	9.20647e+06	5.68537e+06	7.89093e+06	5.55687e+06	7.89093e+06
P08559	Pyruvate dehydrogenase E1 component subunit alpha, somatic form, mitochondrial	0	0	0	0	0
P08579	U2 small nuclear ribonucleoprotein B	4.81204e+06	4.1484e+06	4.90663e+06	1.19813e+06	4.90663e+06
P08670;P17661;Q16352;P07197	Vimentin;Desmin;Alpha-internexin;Neurofilament medium polypeptide	2.56767e+06	3344000	4619700	2.80873e+06	4619700
P0DMV9;P0DMV8;P11142	Heat shock 70 kDa protein 1B;Heat shock 70 kDa protein 1A;Heat shock cognate 71 kDa protein	7.07843e+06	6.19593e+06	9.53037e+06	6.3748e+06	9.53037e+06
P0DMV9;P0DMV8;P11142;P54652;P17066;P48741	Heat shock 70 kDa protein 1B;Heat shock 70 kDa protein 1A;Heat shock cognate 71 kDa protein;Heat shock-related 70 kDa protein 2;Heat shock 70 kDa protein 6;Putative heat shock 70 kDa protein 7	0	0	0	0	0
P0DMV9;P0DMV8;P17066;P48741	Heat shock 70 kDa protein 1B;Heat shock 70 kDa protein 1A;Heat shock 70 kDa protein 6;Putative heat shock 70 kDa protein 7	4.98748e+07	1.00658e+08	1.35657e+08	100219400	1.35657e+08
P10412;P16402	Histone H1.4;Histone H1.3	4.33393e+06	7.61367e+06	7.31077e+06	4685200	7.31077e+06
P10412;P16402;Q02539;P22492;P16403	Histone H1.4;Histone H1.3;Histone H1.1;Histone H1t;Histone H1.2	3.99821e+07	41248300	5.85587e+07	3.39262e+07	5.85587e+07
P11021;P0DMV9;P0DMV8;P11142;P54652;P34931	78 kDa glucose-regulated protein;Heat shock 70 kDa protein 1B;Heat shock 70 kDa protein 1A;Heat shock cognate 71 kDa protein;Heat shock-related 70 kDa protein 2;Heat shock 70 kDa protein 1-like	1.84483e+06	2646100	3.85403e+06	2.46607e+06	3.85403e+06
P11940;Q4VXU2;Q96DU9	Polyadenylate-binding protein 1;Polyadenylate-binding protein 1-like;Polyadenylate-binding protein 5	1.31231e+06	1.2686e+07	22197000	1.69539e+07	22197000
P12111	Collagen alpha-3(VI) chain	0	0	0	0	0
P17028	Zinc finger protein 24	781633	286447	1021300	0	1021300
[truncated: 165 more rows]
