# Supplementary figures and images for: Chlamydia interfere with an interaction between the mannose-6-phosphate receptor and sorting nexins to counteract host restriction
Source: eLife journal article supplement (doi:10.7554/elife.22709), 2017-03-02

**A**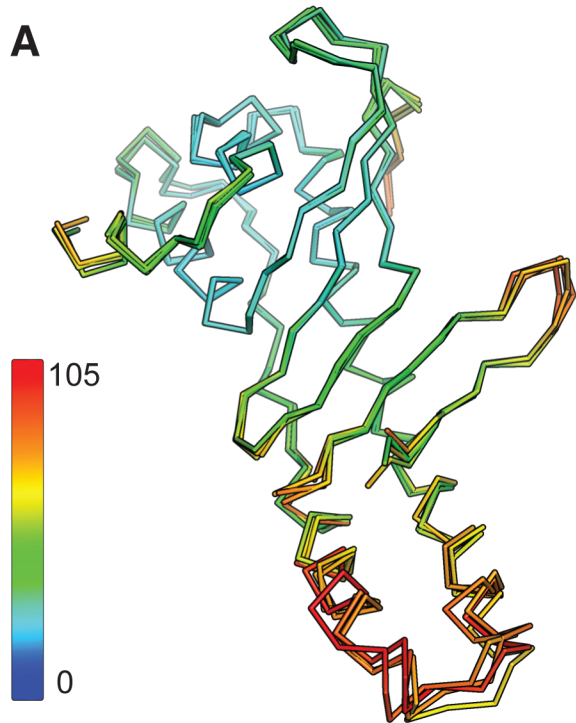**B**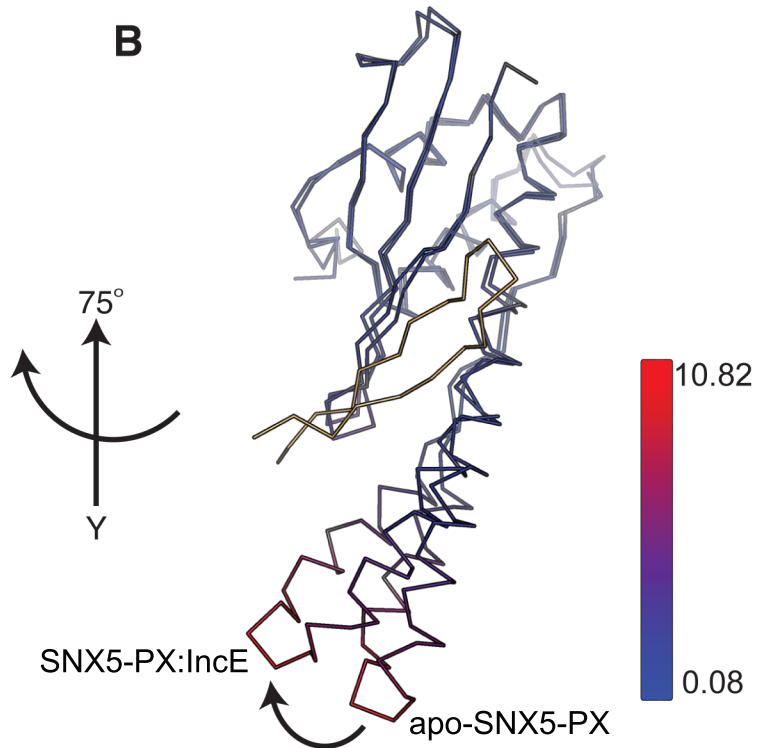

Supplement: supp [file elife_poa_e22709_Figure_1_figure_supplement_1.pdf › elife_poa_e22709_Figure_1_figure_supplement_1.pdf]

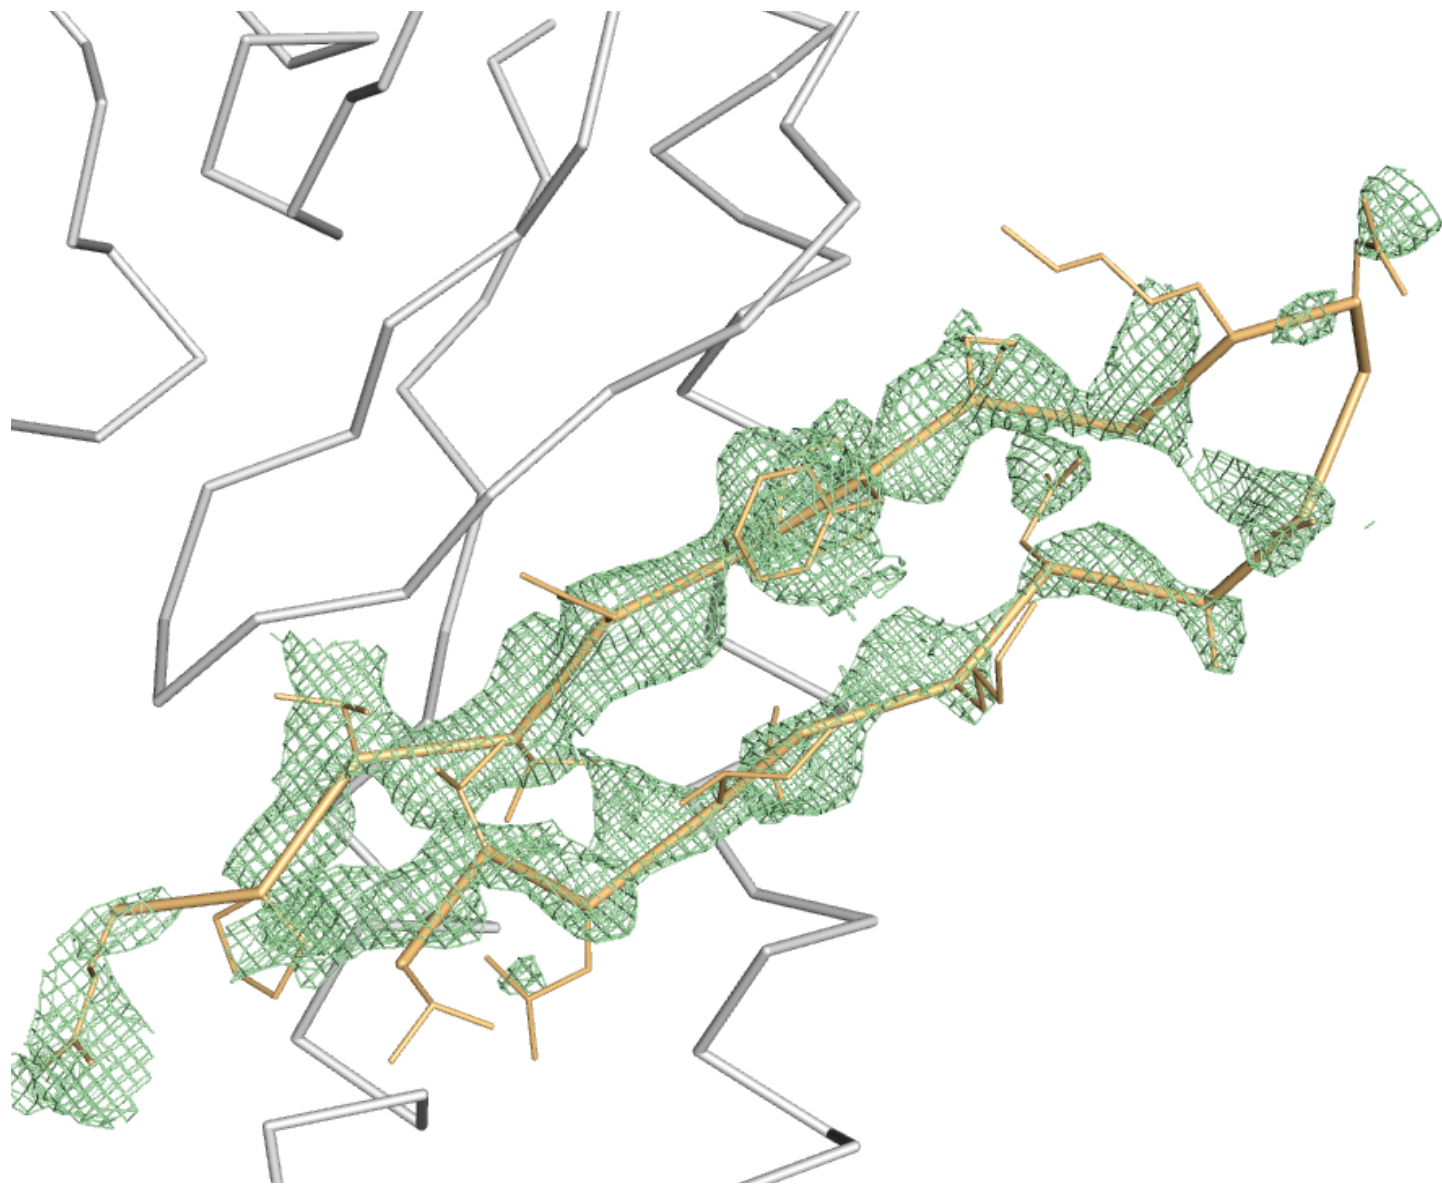

Supplement: supp [file elife_poa_e22709_Figure_1_figure_supplement_2.pdf › elife_poa_e22709_Figure_1_figure_supplement_2.pdf]

**A**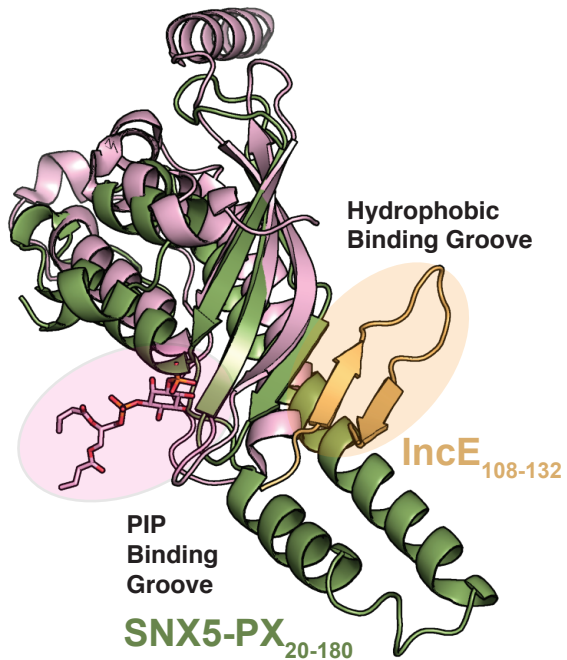**B**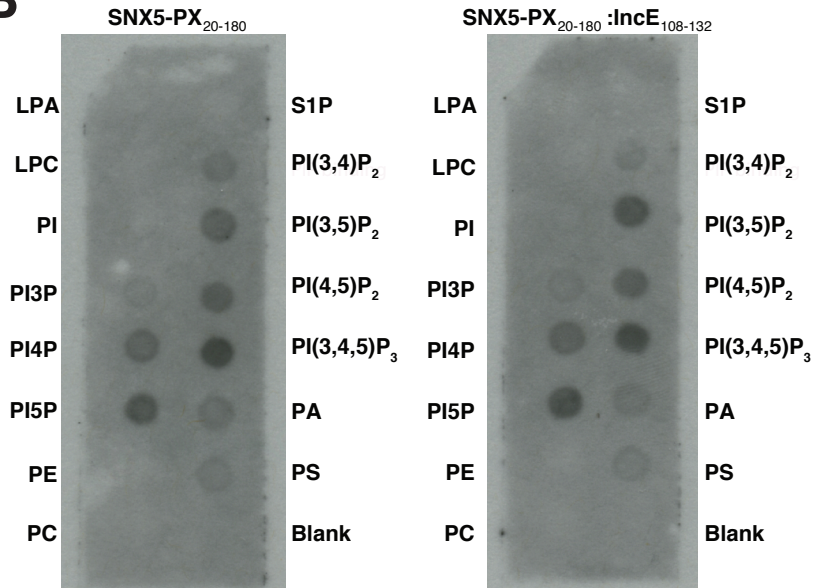

Supplement: supp [file elife_poa_e22709_Figure_1_figure_supplement_3.pdf › elife_poa_e22709_Figure_1_figure_supplement_3.pdf]

**SNX9-PX-BAR**

**BAR domain**

**IncE<sub>108-132</sub>**

**SNX5-PX<sub>20-180</sub>**

**Hydrophobic  
Binding Groove**

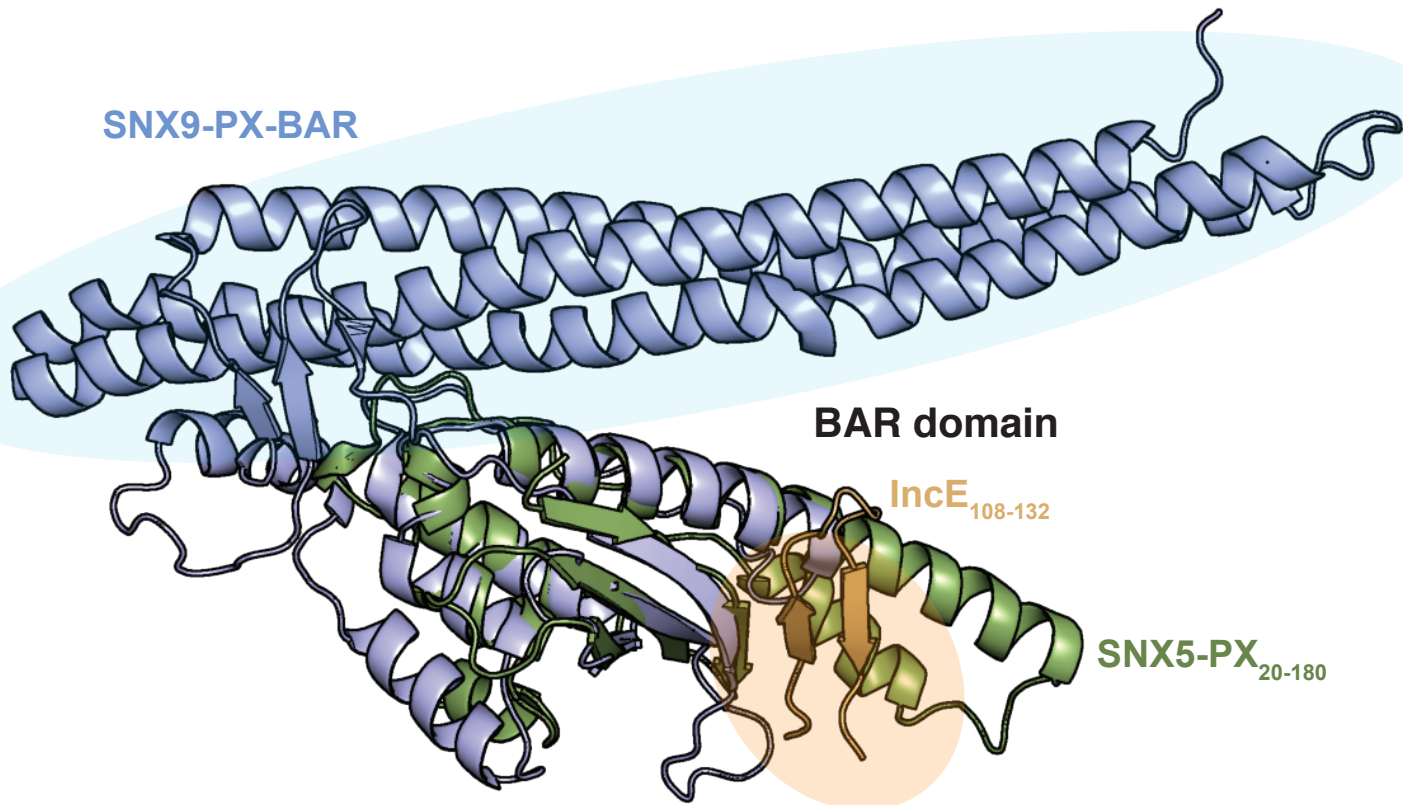

Supplement: supp [file elife_poa_e22709_Figure_1_figure_supplement_4.pdf › elife_poa_e22709_Figure_1_figure_supplement_4.pdf]

FLAG

SNX6

Merge

FLAG  
SNX5<sub>WT</sub>

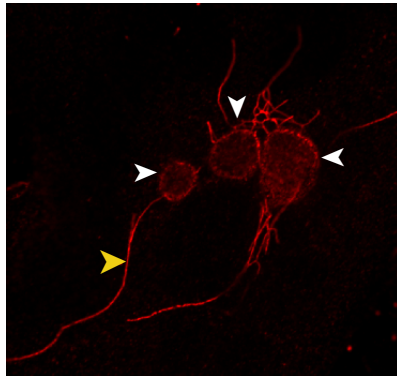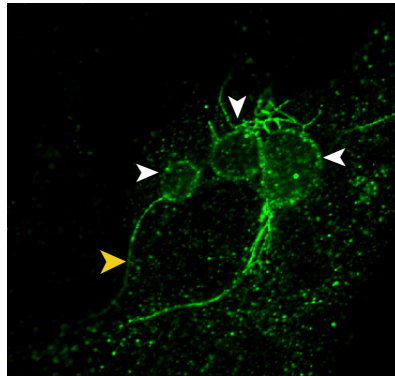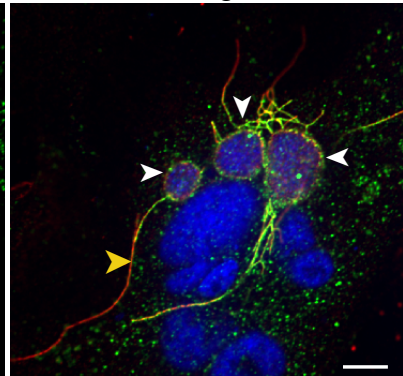

FLAG  
SNX5<sub>Y132D, F136D</sub>

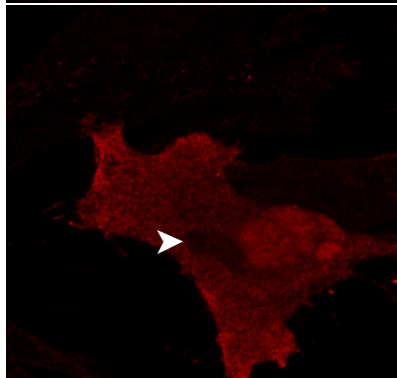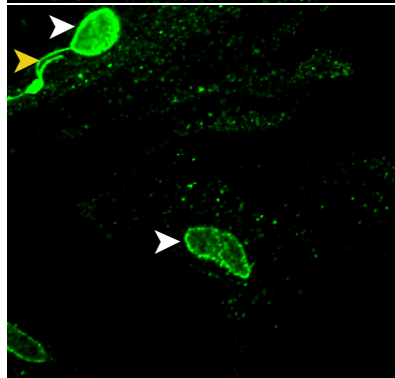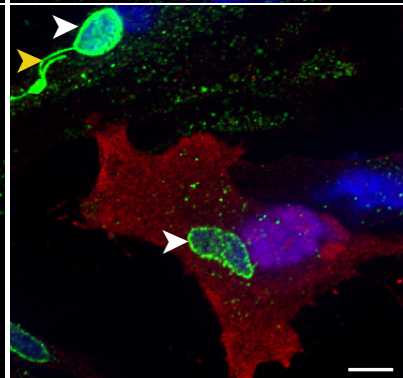

Supplement: supp [file elife_poa_e22709_Figure_2_figure_supplement_1.pdf › elife_poa_e22709_Figure_2_figure_supplement_1.pdf]
